# Supplementary material for: Tumor mutational profile of triple negative breast cancer patients in Thailand revealed distinctive genetic alteration in chromatin remodeling gene
Source: PeerJ. 2019 Feb 25;7:e6501. doi: 10.7717/peerj.6501 (PMC6394341; doi:10.7717/peerj.6501)
Supplement: Supplemental Information 1 — Each tab represented mutational data on most commonly mutated genes found in each sample of Thai TNBC cohort, designated by gene name. [file peerj-07-6501-s001.xlsx]

## Sheet: Description
	File description
	This file is a supplementary data of the article 'Tumor Mutational Profile of Triple Negative Breast Cancer Patients in Thailand Revealed Distinctive Genetic Alteration in Chromatin Remodeling Gene '
	Each tab represented mutational data on most commonly mutated genes found in each sample of Thai TNBC cohort, designated by gene name.
	Except the last tab 'TMB' was the tumor mutation burden data from each sample in the cohort.

## Sheet: TP53
Chrom	Pos	Reference	Call	PN	Gene_symbol	COSMIC_HGVSp	Drug_Gene	Drug_Gene_ApprovalStatus	Drug_Pathway	Drug_Pathway_ApprovalStatus	Drug_SourcePathway	Drug_Mechanism_of_Action	Gene_ActionableDrugClasses	Gene_ActionablePathways	Gene_ActionableTumors	ResistancexSensitivity_Variants	Gene_ActionableMutations	caller_both	caller_either	mutect_judgement	mutect_failure_reasons	varscan2_somatic_status	varscan2_somatic_p_value	varscan2_variant_p_value	COSMIC_IDs	COSMIC_count_vars	COSMIC_pscount	COSMIC_primarysites	COSMIC_count_varsInGene	COSMIC_count_lociInGene	COSMIC_count_primarysitesInGene	COSMIC_primarysitesInGene	dbNSFP_Interpro_domain	GENE_Aliases	VEP_Max_Af	VEP_Max_Impact	VEP_max_consequence	VEP_max_score
chr17	7577144	A	G	MAH_BTN-001	TP53	ENSP00000391127:p.L265P,ENSP00000398846:p.L265P,ENSP00000269305:p.L265P,ENSP00000410739:p.							Cell cycle inhibitors, p53 gene therapy, immunotherapies, Wee1 inhibitors, Chk1 inhibitors			Inactivating mutations of TP53 predict poorer prognosis and increased recurrence in some cancers such as breast and bladder cancer.	Biallelic Inactivation	0	1	KEEP			null	null	COSM11011,COSM1610829,COSM2744546,COSM3388176	45	11	breast,central_nervous_system,haematopoietic_and_lymphoid_tissue,large_intestine,liver,lung,oesophagus,ovary,pancreas,skin,small_intestine	57905	9443	41	NS,adrenal_gland,autonomic_ganglia,biliary_tract,bone,breast,central_nervous_system,cervix,endometrium,eye,fallopian_tube,gastrointestinal_tract_(site_indeterminate),genital_tract,haematopoietic_and_lymphoid_tissue,kidney,large_intestine,liver,lung,meninges,oesophagus,ovary,pancreas,paratesticular_tissues,penis,peritoneum,pituitary,placenta,pleura,prostate,salivary_gland,skin,small_intestine,soft…	p53, DNA-binding domain (1);p53-like transcription factor, DNA-binding (1);p53/RUNT-type transcription factor, DNA-binding domain (1);	LFS1,TP53,p53	0	MODERATE	missense_variant	1
chr17	7577538	C	T	MAH_BTN-003	TP53	ENSP00000410739:p.R248Q,ENSP00000391127:p.R248Q,ENSP00000398846:p.R248Q,ENSP00000269305:p.R248Q							Cell cycle inhibitors, p53 gene therapy, immunotherapies, Wee1 inhibitors, Chk1 inhibitors			Inactivating mutations of TP53 predict poorer prognosis and increased recurrence in some cancers such as breast and bladder cancer.	Biallelic Inactivation	1	1	KEEP		Somatic	0.00010135	0.00010135	COSM10662,COSM1640830,COSM3356964,COSM99020,COSM99021,COSM99602,COSM10662,COSM1640830,COSM3356964,COSM99020,COSM99021,COSM99602	3696	31	NS,adrenal_gland,biliary_tract,bone,breast,central_nervous_system,cervix,endometrium,eye,haematopoietic_and_lymphoid_tissue,kidney,large_intestine,liver,lung,oesophagus,ovary,pancreas,peritoneum,pituitary,pleura,prostate,salivary_gland,skin,small_i...,small_intestine,soft_tissue,stomach,thyroid,upper_aerodigestive_tract,urinary_tract,vulva	57905	9443	41	NS,adrenal_gland,autonomic_ganglia,biliary_tract,bone,breast,central_nervous_system,cervix,endometrium,eye,fallopian_tube,gastrointestinal_tract_(site_indeterminate),genital_tract,haematopoietic_and_lymphoid_tissue,kidney,large_intestine,liver,lung,meninges,oesophagus,ovary,pancreas,paratesticular_tissues,penis,peritoneum,pituitary,placenta,pleura,prostate,salivary_gland,skin,small_intestine,soft…	p53, DNA-binding domain (1);p53-like transcription factor, DNA-binding (1);p53/RUNT-type transcription factor, DNA-binding domain (1);	LFS1,TP53,p53	0.00023116	MODERATE	missense_variant	1
chr17	7578190	T	C	MAH_BTN-004	TP53	ENSP00000410739:p.Y220C,ENSP00000398846:p.Y220C,ENSP00000269305:p.Y220C,ENSP00000391127:p.Y220C							Cell cycle inhibitors, p53 gene therapy, immunotherapies, Wee1 inhibitors, Chk1 inhibitors			Inactivating mutations of TP53 predict poorer prognosis and increased recurrence in some cancers such as breast and bladder cancer.	Biallelic Inactivation	1	1	KEEP		Somatic	0.00028065	0.00028065	COSM10758,COSM1644277,COSM3355993,COSM99718,COSM99719,COSM99720	921	22	biliary_tract,bone,breast,central_nervous_system,endometrium,haematopoietic_and_...,haematopoietic_and_lymphoid_tissue,large_intestine,liver,lung,oesophagus,ovary,pancreas,peritoneum,prostate,salivary_gland,skin,small_intestine,soft_tissue,stomach,upper_aerodigestive_tract,urinary_tract	57905	9443	41	NS,adrenal_gland,autonomic_ganglia,biliary_tract,bone,breast,central_nervous_system,cervix,endometrium,eye,fallopian_tube,gastrointestinal_tract_(site_indeterminate),genital_tract,haematopoietic_and_lymphoid_tissue,kidney,large_intestine,liver,lung,meninges,oesophagus,ovary,pancreas,paratesticular_tissues,penis,peritoneum,pituitary,placenta,pleura,prostate,salivary_gland,skin,small_intestine,soft…	p53, DNA-binding domain (1);p53-like transcription factor, DNA-binding (1);p53/RUNT-type transcription factor, DNA-binding domain (1);	LFS1,TP53,p53	4.54339e-05	MODERATE	missense_variant	1
chr17	7578268	A	C	MAH_BTN-005	TP53	ENSP00000398846:p.L194R,ENSP00000269305:p.L194R,ENSP00000410739:p.L194R,ENSP00000391127:p.L194R							Cell cycle inhibitors, p53 gene therapy, immunotherapies, Wee1 inhibitors, Chk1 inhibitors			Inactivating mutations of TP53 predict poorer prognosis and increased recurrence in some cancers such as breast and bladder cancer.	Biallelic Inactivation	1	1	KEEP		Somatic	0.0030837	0.0030837	COSM117647,COSM117648,COSM117649,COSM117650,COSM1649391,COSM3403268,COSM44571,COSM117647,COSM117648,COSM117649,COSM117650,COSM1649391,COSM3403268,COSM44571	458	15	breast,central_nervous_system,haem...,haematopoietic_and_lymphoid_tissue,large_intestine,liver,lung,oesophagus,ovary,pancreas,salivary_gland,skin,stomach,upper_aerodigestive_tract,urinary_tract	57905	9443	41	NS,adrenal_gland,autonomic_ganglia,biliary_tract,bone,breast,central_nervous_system,cervix,endometrium,eye,fallopian_tube,gastrointestinal_tract_(site_indeterminate),genital_tract,haematopoietic_and_lymphoid_tissue,kidney,large_intestine,liver,lung,meninges,oesophagus,ovary,pancreas,paratesticular_tissues,penis,peritoneum,pituitary,placenta,pleura,prostate,salivary_gland,skin,small_intestine,soft…	p53, DNA-binding domain (1);p53-like transcription factor, DNA-binding (1);p53/RUNT-type transcription factor, DNA-binding domain (1);	LFS1,TP53,p53	0	MODERATE	missense_variant	1
chr17	7578275	G	A	MAH_BTN-006	TP53	ENSP00000410739:p.Q192*,ENSP00000398846:p.Q192*,ENSP00000269305:p.Q192*,ENSP00000391127:p.Q192*							Cell cycle inhibitors, p53 gene therapy, immunotherapies, Wee1 inhibitors, Chk1 inhibitors			Inactivating mutations of TP53 predict poorer prognosis and increased recurrence in some cancers such as breast and bladder cancer.	Biallelic Inactivation	1	1	KEEP		Somatic	1.0149e-20	1.0149e-20	COSM10733,COSM117946,COSM117947,COSM117948,COSM117949,COSM1649390,COSM3370929	269	18	biliary_tract,breast,cervix,endometrium,eye,haematopoietic_and_lymphoid_tissue,kidney,large_intestine,liver,lung,oesophagus,ovary,pancreas,skin,stomach,thyroid,upper_aerodigestive_tract,urinary_tract	57905	9443	41	NS,adrenal_gland,autonomic_ganglia,biliary_tract,bone,breast,central_nervous_system,cervix,endometrium,eye,fallopian_tube,gastrointestinal_tract_(site_indeterminate),genital_tract,haematopoietic_and_lymphoid_tissue,kidney,large_intestine,liver,lung,meninges,oesophagus,ovary,pancreas,paratesticular_tissues,penis,peritoneum,pituitary,placenta,pleura,prostate,salivary_gland,skin,small_intestine,soft…		LFS1,TP53,p53	0	HIGH	stop_gained	0
chr17	7577094	G	A	MAH_BTN-007	TP53	ENSP00000391127:p.R282W,ENSP00000398846:p.R282W,ENSP00000269305:p.R282W,ENSP00000410739:p.							Cell cycle inhibitors, p53 gene therapy, immunotherapies, Wee1 inhibitors, Chk1 inhibitors			Inactivating mutations of TP53 predict poorer prognosis and increased recurrence in some cancers such as breast and bladder cancer.	Biallelic Inactivation	1	1	KEEP		Somatic	0.0004259	0.0004259	COSM10704,COSM1636702,COSM3378339,COSM99925,COSM10704,COSM1636702,COSM3378339,COSM99925	2012	26	NS,biliary_tract,bone,breast,central_nervous_system,endometrium,haematopoietic_and_lymphoid_tissue,large_intestine,liver,lung,oesophagus,ovary,pancreas,peritoneum,prostate,salivary_gland,skin,small_intestine,soft_tissue,stomach,thymus,thyroid,upper_aerodigestive_tract,urinary_...,urinary_tract,vulva	57905	9443	41	NS,adrenal_gland,autonomic_ganglia,biliary_tract,bone,breast,central_nervous_system,cervix,endometrium,eye,fallopian_tube,gastrointestinal_tract_(site_indeterminate),genital_tract,haematopoietic_and_lymphoid_tissue,kidney,large_intestine,liver,lung,meninges,oesophagus,ovary,pancreas,paratesticular_tissues,penis,peritoneum,pituitary,placenta,pleura,prostate,salivary_gland,skin,small_intestine,soft…	p53, DNA-binding domain (1);p53-like transcription factor, DNA-binding (1);p53/RUNT-type transcription factor, DNA-binding domain (1);	LFS1,TP53,p53	0.0002	MODERATE	missense_variant	1
chr17	7578406	C	T	MAH_BTN-009	TP53	ENSP00000391127:p.R175H,ENSP00000398846:p.R175H,ENSP00000269305:p.R175H,ENSP00000410739:p.R175H							Cell cycle inhibitors, p53 gene therapy, immunotherapies, Wee1 inhibitors, Chk1 inhibitors			Inactivating mutations of TP53 predict poorer prognosis and increased recurrence in some cancers such as breast and bladder cancer.	Biallelic Inactivation	1	1	KEEP		Somatic	2.5916e-11	2.5916e-11	COSM10648,COSM1640851,COSM3355994,COSM99022,COSM99023,COSM99024,COSM99914,COSM10648,COSM1640851,COSM3355994,COSM99022,COSM99023,COSM99024,COSM99914,COSM10648,COSM1640851,COSM3355994,COSM99022,COSM99023,COSM99024,COSM99914,COSM10648,COSM1640851,COSM3355994,COSM99022,COSM99023,COSM99024,COSM99914,COSM10648,COSM1640851,COSM3355994,COSM99022,COSM99023,COSM99024,COSM99914,COSM10648,COSM1640851,COSM335…	17958	29	...,NS,adrenal_gland,biliary_tract,bone,breast,central_nervous_system,cervix,endometrium,haematopoietic_and_lymphoid_tissue,kidney,large_intestine,liver,lung,oesophagus,ovary,pancreas,penis,peritoneum,prostate,salivary_gland,skin,small_intestine,soft_tissue,stomach,thyroid,upper_aerodigestive_tract,urinary_tract,vulva	57905	9443	41	NS,adrenal_gland,autonomic_ganglia,biliary_tract,bone,breast,central_nervous_system,cervix,endometrium,eye,fallopian_tube,gastrointestinal_tract_(site_indeterminate),genital_tract,haematopoietic_and_lymphoid_tissue,kidney,large_intestine,liver,lung,meninges,oesophagus,ovary,pancreas,paratesticular_tissues,penis,peritoneum,pituitary,placenta,pleura,prostate,salivary_gland,skin,small_intestine,soft…	p53, DNA-binding domain (1);p53-like transcription factor, DNA-binding (1);p53/RUNT-type transcription factor, DNA-binding domain (1);	LFS1,TP53,p53	1.49934e-05	MODERATE	missense_variant	1
chr17	7578440	T	A	MAH_BTN-010	TP53	ENSP00000391127:p.K164*,ENSP00000410739:p.K164*,ENSP00000398846:p.K164*,ENSP00000269305:p.K164*							Cell cycle inhibitors, p53 gene therapy, immunotherapies, Wee1 inhibitors, Chk1 inhibitors			Inactivating mutations of TP53 predict poorer prognosis and increased recurrence in some cancers such as breast and bladder cancer.	Biallelic Inactivation	0	1	KEEP			null	null	COSM10750,COSM2744884,COSM380904,COSM380905,COSM380906,COSM380907,COSM4271940	29	7	breast,central_nervous_system,liver,lung,oesophagus,upper_aerodigestive_tract,urinary_tract	57905	9443	41	NS,adrenal_gland,autonomic_ganglia,biliary_tract,bone,breast,central_nervous_system,cervix,endometrium,eye,fallopian_tube,gastrointestinal_tract_(site_indeterminate),genital_tract,haematopoietic_and_lymphoid_tissue,kidney,large_intestine,liver,lung,meninges,oesophagus,ovary,pancreas,paratesticular_tissues,penis,peritoneum,pituitary,placenta,pleura,prostate,salivary_gland,skin,small_intestine,soft…		LFS1,TP53,p53	0	HIGH	stop_gained	0
chr17	7577120	C	T	MAH_BTN-011	TP53	ENSP00000398846:p.R273H,ENSP00000269305:p.R273H,ENSP00000391127:p.R273H,ENSP00000410739:p.							Cell cycle inhibitors, p53 gene therapy, immunotherapies, Wee1 inhibitors, Chk1 inhibitors			Inactivating mutations of TP53 predict poorer prognosis and increased recurrence in some cancers such as breast and bladder cancer.	Biallelic Inactivation	1	1	KEEP		Somatic	7.6888e-08	7.6888e-08	COSM10660,COSM1645335,COSM3356963,COSM99729,COSM10660,COSM1645335,COSM3356963,COSM99729	2934	27	NS,biliary_tract,bone,breast,centr...,central_nervous_system,cervix,endometrium,fallopian_tube,genital_tract,haematopoietic_and_lymphoid_tissue,large_intestine,liver,lung,oesophagus,ovary,pancreas,penis,prostate,salivary_gland,skin,soft_tissue,stomach,thymus,upper_aerodigestive_tract,urinary_tract,vulva	57905	9443	41	NS,adrenal_gland,autonomic_ganglia,biliary_tract,bone,breast,central_nervous_system,cervix,endometrium,eye,fallopian_tube,gastrointestinal_tract_(site_indeterminate),genital_tract,haematopoietic_and_lymphoid_tissue,kidney,large_intestine,liver,lung,meninges,oesophagus,ovary,pancreas,paratesticular_tissues,penis,peritoneum,pituitary,placenta,pleura,prostate,salivary_gland,skin,small_intestine,soft…	p53, DNA-binding domain (1);p53-like transcription factor, DNA-binding (1);p53/RUNT-type transcription factor, DNA-binding domain (1);	LFS1,TP53,p53	0.001	MODERATE	missense_variant	1
chr17	7578414	A	AACCTCCGTCATGTGC	MAH_BTN-012	TP53	ENSP00000391127:p.Q167QHMTEV,ENSP00000410739:p.Q167QHMTEV,ENSP00000269305:p.Q167QHMTEV,ENSP00000398846:p.Q167QHMTEV							Cell cycle inhibitors, p53 gene therapy, immunotherapies, Wee1 inhibitors, Chk1 inhibitors			Inactivating mutations of TP53 predict poorer prognosis and increased recurrence in some cancers such as breast and bladder cancer.	Biallelic Inactivation	0	1			Somatic	0.0051909	0.0051909		null	null		57905	9443	41	NS,adrenal_gland,autonomic_ganglia,biliary_tract,bone,breast,central_nervous_system,cervix,endometrium,eye,fallopian_tube,gastrointestinal_tract_(site_indeterminate),genital_tract,haematopoietic_and_lymphoid_tissue,kidney,large_intestine,liver,lung,meninges,oesophagus,ovary,pancreas,paratesticular_tissues,penis,peritoneum,pituitary,placenta,pleura,prostate,salivary_gland,skin,small_intestine,soft…		LFS1,TP53,p53	0	MODERATE	inframe_insertion	0
chr17	7578527	A	G	MAH_BTN-013	TP53	ENSP00000410739:p.C135R,ENSP00000391127:p.C135R,ENSP00000398846:p.C135R,ENSP00000269305:p.C135R							Cell cycle inhibitors, p53 gene therapy, immunotherapies, Wee1 inhibitors, Chk1 inhibitors			Inactivating mutations of TP53 predict poorer prognosis and increased recurrence in some cancers such as breast and bladder cancer.	Biallelic Inactivation	1	1	KEEP		Somatic	1.5744e-10	1.5744e-10	COSM10684,COSM2744947,COSM308318,COSM308319,COSM308320,COSM308321,COSM3820724	37	9	biliary_tract,bone,breast,haematopoietic_and_lymphoid_tissue,large_intestine,oesophagus,ovary,skin,upper_aerodigestive_tract	57905	9443	41	NS,adrenal_gland,autonomic_ganglia,biliary_tract,bone,breast,central_nervous_system,cervix,endometrium,eye,fallopian_tube,gastrointestinal_tract_(site_indeterminate),genital_tract,haematopoietic_and_lymphoid_tissue,kidney,large_intestine,liver,lung,meninges,oesophagus,ovary,pancreas,paratesticular_tissues,penis,peritoneum,pituitary,placenta,pleura,prostate,salivary_gland,skin,small_intestine,soft…	p53, DNA-binding domain (1);p53-like transcription factor, DNA-binding (1);p53/RUNT-type transcription factor, DNA-binding domain (1);	LFS1,TP53,p53	0	MODERATE	missense_variant	1
chr17	7576928	T	C	MAH_BTN-014	TP53	ENSP00000391127:p.,ENSP00000398846:p.,ENSP00000269305:p.,ENSP00000410739:p.							Cell cycle inhibitors, p53 gene therapy, immunotherapies, Wee1 inhibitors, Chk1 inhibitors			Inactivating mutations of TP53 predict poorer prognosis and increased recurrence in some cancers such as breast and bladder cancer.	Biallelic Inactivation	1	1	KEEP		Somatic	2.0555e-07	2.0555e-07	COSM121092,COSM1649347,COSM33650,COSM3388167	58	9	breast,haematopoietic_and_lymphoid_tissue,large_intestine,liver,lung,ovary,pancreas,soft_tissue,upper_aerodigestive_tract	57905	9443	41	NS,adrenal_gland,autonomic_ganglia,biliary_tract,bone,breast,central_nervous_system,cervix,endometrium,eye,fallopian_tube,gastrointestinal_tract_(site_indeterminate),genital_tract,haematopoietic_and_lymphoid_tissue,kidney,large_intestine,liver,lung,meninges,oesophagus,ovary,pancreas,paratesticular_tissues,penis,peritoneum,pituitary,placenta,pleura,prostate,salivary_gland,skin,small_intestine,soft…		LFS1,TP53,p53	0	HIGH	splice_acceptor_variant	0
chr17	7578212	G	A	MAH_BTN-015	TP53	ENSP00000391127:p.R213*,ENSP00000410739:p.R213*,ENSP00000398846:p.R213*,ENSP00000269305:p.R213*							Cell cycle inhibitors, p53 gene therapy, immunotherapies, Wee1 inhibitors, Chk1 inhibitors			Inactivating mutations of TP53 predict poorer prognosis and increased recurrence in some cancers such as breast and bladder cancer.	Biallelic Inactivation	1	1	KEEP		Somatic	3.8262e-11	3.8262e-11	COSM10654,COSM1638393,COSM3378350,COSM99615,COSM99616,COSM99617,COSM99618,COSM10654,COSM1638393,COSM3378350,COSM99615,COSM99616,COSM99617,COSM99618,COSM10654,COSM1638393,COSM3378350,COSM99615,COSM99616,COSM99617,COSM99618,COSM10654,COSM1638393,COSM3378350,COSM99615,COSM99616,COSM99617,COSM99618	5192	24	NS,biliary_tract,bone,breast,central_nervous_system,endometrium,haematopoietic_and_lymphoid_tissue,kidn...,kidney,large_intestine,liver,lung,oesophagus,ovary,pancreas,prostate,salivary_gland,skin,small_intestine,soft_tissue,stomach,thyroid,upper_aerodigestive_tract,urinary_tract	57905	9443	41	NS,adrenal_gland,autonomic_ganglia,biliary_tract,bone,breast,central_nervous_system,cervix,endometrium,eye,fallopian_tube,gastrointestinal_tract_(site_indeterminate),genital_tract,haematopoietic_and_lymphoid_tissue,kidney,large_intestine,liver,lung,meninges,oesophagus,ovary,pancreas,paratesticular_tissues,penis,peritoneum,pituitary,placenta,pleura,prostate,salivary_gland,skin,small_intestine,soft…		LFS1,TP53,p53	1.50024e-05	HIGH	stop_gained	0
chr17	7578534	C	G	MAH_BTN-016	TP53	ENSP00000269305:p.K132N,ENSP00000410739:p.K132N,ENSP00000391127:p.K132N,ENSP00000398846:p.K132N							Cell cycle inhibitors, p53 gene therapy, immunotherapies, Wee1 inhibitors, Chk1 inhibitors			Inactivating mutations of TP53 predict poorer prognosis and increased recurrence in some cancers such as breast and bladder cancer.	Biallelic Inactivation	0	1	KEEP			null	null	COSM1750373,COSM301220,COSM301221,COSM301222,COSM3726808,COSM43963	89	11	adrenal_gland,breast,cervix,haematopoietic_and_lymphoid_tissue,large_intestine,lung,oesophagus,ovary,penis,upper_aerodigestive_tract,urinary_tract	57905	9443	41	NS,adrenal_gland,autonomic_ganglia,biliary_tract,bone,breast,central_nervous_system,cervix,endometrium,eye,fallopian_tube,gastrointestinal_tract_(site_indeterminate),genital_tract,haematopoietic_and_lymphoid_tissue,kidney,large_intestine,liver,lung,meninges,oesophagus,ovary,pancreas,paratesticular_tissues,penis,peritoneum,pituitary,placenta,pleura,prostate,salivary_gland,skin,small_intestine,soft…	p53, DNA-binding domain (1);p53-like transcription factor, DNA-binding (1);p53/RUNT-type transcription factor, DNA-binding domain (1);	LFS1,TP53,p53	0	HIGH	splice_acceptor_variant	1
chr17	7578395	G	T	MAH_BTN-017	TP53	ENSP00000398846:p.H179N,ENSP00000269305:p.H179N,ENSP00000410739:p.H179N,ENSP00000391127:p.H179N							Cell cycle inhibitors, p53 gene therapy, immunotherapies, Wee1 inhibitors, Chk1 inhibitors			Inactivating mutations of TP53 predict poorer prognosis and increased recurrence in some cancers such as breast and bladder cancer.	Biallelic Inactivation	1	1	KEEP		Somatic	0.00014422	0.00014422	COSM326727,COSM326728,COSM326729,COSM326730,COSM44151,COSM4749459,COSM4749460	52	13	NS,breast,central_nervous_system,cervix,endometrium,large_intestine,liver,lung,oesophagus,skin,soft_tissue,stomach,upper_aerodigestive_tract	57905	9443	41	NS,adrenal_gland,autonomic_ganglia,biliary_tract,bone,breast,central_nervous_system,cervix,endometrium,eye,fallopian_tube,gastrointestinal_tract_(site_indeterminate),genital_tract,haematopoietic_and_lymphoid_tissue,kidney,large_intestine,liver,lung,meninges,oesophagus,ovary,pancreas,paratesticular_tissues,penis,peritoneum,pituitary,placenta,pleura,prostate,salivary_gland,skin,small_intestine,soft…	p53, DNA-binding domain (1);p53-like transcription factor, DNA-binding (1);p53/RUNT-type transcription factor, DNA-binding domain (1);	LFS1,TP53,p53	0	MODERATE	missense_variant	1
chr17	7578265	A	T	MAH_BTN-018	TP53	ENSP00000269305:p.I195N,ENSP00000410739:p.I195N,ENSP00000391127:p.I195N,ENSP00000398846:p.I195N							Cell cycle inhibitors, p53 gene therapy, immunotherapies, Wee1 inhibitors, Chk1 inhibitors			Inactivating mutations of TP53 predict poorer prognosis and increased recurrence in some cancers such as breast and bladder cancer.	Biallelic Inactivation	1	1	KEEP		Somatic	6.0478e-19	6.0478e-19	COSM1738250,COSM1738251,COSM1738252,COSM1738253,COSM1738254,COSM3403267,COSM44877	93	12	NS,biliary_tract,breast,central_nervous_system,haematopoietic_and_lymphoid_tissue,large_intestine,liver,lung,oesophagus,ovary,pancreas,stomach	57905	9443	41	NS,adrenal_gland,autonomic_ganglia,biliary_tract,bone,breast,central_nervous_system,cervix,endometrium,eye,fallopian_tube,gastrointestinal_tract_(site_indeterminate),genital_tract,haematopoietic_and_lymphoid_tissue,kidney,large_intestine,liver,lung,meninges,oesophagus,ovary,pancreas,paratesticular_tissues,penis,peritoneum,pituitary,placenta,pleura,prostate,salivary_gland,skin,small_intestine,soft…	p53, DNA-binding domain (1);p53-like transcription factor, DNA-binding (1);p53/RUNT-type transcription factor, DNA-binding domain (1);	LFS1,TP53,p53	0	MODERATE	missense_variant	1
chr17	7578406	C	T	MAH_BTN-019	TP53	ENSP00000391127:p.R175H,ENSP00000398846:p.R175H,ENSP00000269305:p.R175H,ENSP00000410739:p.R175H							Cell cycle inhibitors, p53 gene therapy, immunotherapies, Wee1 inhibitors, Chk1 inhibitors			Inactivating mutations of TP53 predict poorer prognosis and increased recurrence in some cancers such as breast and bladder cancer.	Biallelic Inactivation	1	1	KEEP		Somatic	3.1139e-32	3.1139e-32	COSM10648,COSM1640851,COSM3355994,COSM99022,COSM99023,COSM99024,COSM99914,COSM10648,COSM1640851,COSM3355994,COSM99022,COSM99023,COSM99024,COSM99914,COSM10648,COSM1640851,COSM3355994,COSM99022,COSM99023,COSM99024,COSM99914,COSM10648,COSM1640851,COSM3355994,COSM99022,COSM99023,COSM99024,COSM99914,COSM10648,COSM1640851,COSM3355994,COSM99022,COSM99023,COSM99024,COSM99914,COSM10648,COSM1640851,COSM335…	17958	29	...,NS,adrenal_gland,biliary_tract,bone,breast,central_nervous_system,cervix,endometrium,haematopoietic_and_lymphoid_tissue,kidney,large_intestine,liver,lung,oesophagus,ovary,pancreas,penis,peritoneum,prostate,salivary_gland,skin,small_intestine,soft_tissue,stomach,thyroid,upper_aerodigestive_tract,urinary_tract,vulva	57905	9443	41	NS,adrenal_gland,autonomic_ganglia,biliary_tract,bone,breast,central_nervous_system,cervix,endometrium,eye,fallopian_tube,gastrointestinal_tract_(site_indeterminate),genital_tract,haematopoietic_and_lymphoid_tissue,kidney,large_intestine,liver,lung,meninges,oesophagus,ovary,pancreas,paratesticular_tissues,penis,peritoneum,pituitary,placenta,pleura,prostate,salivary_gland,skin,small_intestine,soft…	p53, DNA-binding domain (1);p53-like transcription factor, DNA-binding (1);p53/RUNT-type transcription factor, DNA-binding domain (1);	LFS1,TP53,p53	1.49934e-05	MODERATE	missense_variant	1
chr17	7578522	TTGGCAAAACATC	T	MAH_BTN-021	TP53	ENSP00000410739:p.KMFCQ132-136K,ENSP00000391127:p.KMFCQ132-136K,ENSP00000398846:p.KMFCQ132-136K,ENSP00000269305:p.KMFCQ132-136K							Cell cycle inhibitors, p53 gene therapy, immunotherapies, Wee1 inhibitors, Chk1 inhibitors			Inactivating mutations of TP53 predict poorer prognosis and increased recurrence in some cancers such as breast and bladder cancer.	Biallelic Inactivation	0	1			Somatic	2.7475e-06	2.7475e-06		null	null		57905	9443	41	NS,adrenal_gland,autonomic_ganglia,biliary_tract,bone,breast,central_nervous_system,cervix,endometrium,eye,fallopian_tube,gastrointestinal_tract_(site_indeterminate),genital_tract,haematopoietic_and_lymphoid_tissue,kidney,large_intestine,liver,lung,meninges,oesophagus,ovary,pancreas,paratesticular_tissues,penis,peritoneum,pituitary,placenta,pleura,prostate,salivary_gland,skin,small_intestine,soft…		LFS1,TP53,p53	0	HIGH	splice_acceptor_variant	0
chr17	7578546	AG	A	MAH_BTN-022	TP53	ENSP00000410739:p.P128X,ENSP00000391127:p.P128X,ENSP00000398846:p.P128X,ENSP00000269305:p.P128X							Cell cycle inhibitors, p53 gene therapy, immunotherapies, Wee1 inhibitors, Chk1 inhibitors			Inactivating mutations of TP53 predict poorer prognosis and increased recurrence in some cancers such as breast and bladder cancer.	Biallelic Inactivation	0	1			Somatic	3.2342e-19	3.2342e-19	COSM5198771,COSM5198772,COSM5198773,COSM5198774,COSM5198775,COSM5198776,COSM44396,COSM46131	12	5	breast,large_intestine,oesophagus,ovary,upper_aerodigestive_tract	57905	9443	41	NS,adrenal_gland,autonomic_ganglia,biliary_tract,bone,breast,central_nervous_system,cervix,endometrium,eye,fallopian_tube,gastrointestinal_tract_(site_indeterminate),genital_tract,haematopoietic_and_lymphoid_tissue,kidney,large_intestine,liver,lung,meninges,oesophagus,ovary,pancreas,paratesticular_tissues,penis,peritoneum,pituitary,placenta,pleura,prostate,salivary_gland,skin,small_intestine,soft…		LFS1,TP53,p53	0	HIGH	frameshift_variant	0
chr17	7577551	CCATGCAGGAACTGTTA	C	MAH_BTN-023	TP53	ENSP00000410739:p.CNSSCM238-243X,ENSP00000269305:p.CNSSCM238-243X,ENSP00000398846:p.CNSSCM238-243X,ENSP00000391127:p.CNSSCM238-243X							Cell cycle inhibitors, p53 gene therapy, immunotherapies, Wee1 inhibitors, Chk1 inhibitors			Inactivating mutations of TP53 predict poorer prognosis and increased recurrence in some cancers such as breast and bladder cancer.	Biallelic Inactivation	0	1			Somatic	0.0047006	0.0047006		null	null		57905	9443	41	NS,adrenal_gland,autonomic_ganglia,biliary_tract,bone,breast,central_nervous_system,cervix,endometrium,eye,fallopian_tube,gastrointestinal_tract_(site_indeterminate),genital_tract,haematopoietic_and_lymphoid_tissue,kidney,large_intestine,liver,lung,meninges,oesophagus,ovary,pancreas,paratesticular_tissues,penis,peritoneum,pituitary,placenta,pleura,prostate,salivary_gland,skin,small_intestine,soft…		LFS1,TP53,p53	0	HIGH	frameshift_variant	0
chr17	7577046	C	A	MAH_BTN-025	TP53	ENSP00000269305:p.E298*,ENSP00000391127:p.E298*,ENSP00000410739:p.,ENSP00000398846:p.E298*							Cell cycle inhibitors, p53 gene therapy, immunotherapies, Wee1 inhibitors, Chk1 inhibitors			Inactivating mutations of TP53 predict poorer prognosis and increased recurrence in some cancers such as breast and bladder cancer.	Biallelic Inactivation	1	1	KEEP		Somatic	3.1303e-05	3.1303e-05	COSM10710,COSM121080,COSM1646820,COSM3723940	90	12	breast,large_intestine,liver,lung,oesophagus,ovary,pancreas,salivary_gland,skin,soft_tissue,upper_aerodigestive_tract,urinary_tract	57905	9443	41	NS,adrenal_gland,autonomic_ganglia,biliary_tract,bone,breast,central_nervous_system,cervix,endometrium,eye,fallopian_tube,gastrointestinal_tract_(site_indeterminate),genital_tract,haematopoietic_and_lymphoid_tissue,kidney,large_intestine,liver,lung,meninges,oesophagus,ovary,pancreas,paratesticular_tissues,penis,peritoneum,pituitary,placenta,pleura,prostate,salivary_gland,skin,small_intestine,soft…		LFS1,TP53,p53	0	HIGH	stop_gained	0
chr17	7577538	C	T	MAH_BTN-026	TP53	ENSP00000410739:p.R248Q,ENSP00000391127:p.R248Q,ENSP00000398846:p.R248Q,ENSP00000269305:p.R248Q							Cell cycle inhibitors, p53 gene therapy, immunotherapies, Wee1 inhibitors, Chk1 inhibitors			Inactivating mutations of TP53 predict poorer prognosis and increased recurrence in some cancers such as breast and bladder cancer.	Biallelic Inactivation	1	1	KEEP		Somatic	3.4748e-05	3.4748e-05	COSM10662,COSM1640830,COSM3356964,COSM99020,COSM99021,COSM99602,COSM10662,COSM1640830,COSM3356964,COSM99020,COSM99021,COSM99602	3696	31	NS,adrenal_gland,biliary_tract,bone,breast,central_nervous_system,cervix,endometrium,eye,haematopoietic_and_lymphoid_tissue,kidney,large_intestine,liver,lung,oesophagus,ovary,pancreas,peritoneum,pituitary,pleura,prostate,salivary_gland,skin,small_i...,small_intestine,soft_tissue,stomach,thyroid,upper_aerodigestive_tract,urinary_tract,vulva	57905	9443	41	NS,adrenal_gland,autonomic_ganglia,biliary_tract,bone,breast,central_nervous_system,cervix,endometrium,eye,fallopian_tube,gastrointestinal_tract_(site_indeterminate),genital_tract,haematopoietic_and_lymphoid_tissue,kidney,large_intestine,liver,lung,meninges,oesophagus,ovary,pancreas,paratesticular_tissues,penis,peritoneum,pituitary,placenta,pleura,prostate,salivary_gland,skin,small_intestine,soft…	p53, DNA-binding domain (1);p53-like transcription factor, DNA-binding (1);p53/RUNT-type transcription factor, DNA-binding domain (1);	LFS1,TP53,p53	0.00023116	MODERATE	missense_variant	1
chr17	7578431	G	GT	MAH_BTN-027	TP53	ENSP00000269305:p.S166SX,ENSP00000398846:p.S166SX,ENSP00000410739:p.S166SX,ENSP00000391127:p.S166SX							Cell cycle inhibitors, p53 gene therapy, immunotherapies, Wee1 inhibitors, Chk1 inhibitors			Inactivating mutations of TP53 predict poorer prognosis and increased recurrence in some cancers such as breast and bladder cancer.	Biallelic Inactivation	0	1			Somatic	3.2956e-08	3.2956e-08	COSM69214	1	1	ovary	57905	9443	41	NS,adrenal_gland,autonomic_ganglia,biliary_tract,bone,breast,central_nervous_system,cervix,endometrium,eye,fallopian_tube,gastrointestinal_tract_(site_indeterminate),genital_tract,haematopoietic_and_lymphoid_tissue,kidney,large_intestine,liver,lung,meninges,oesophagus,ovary,pancreas,paratesticular_tissues,penis,peritoneum,pituitary,placenta,pleura,prostate,salivary_gland,skin,small_intestine,soft…		LFS1,TP53,p53	0	HIGH	frameshift_variant	0
chr17	7578184	G	A	MAH_BTN-028	TP53	ENSP00000410739:p.P222L,ENSP00000391127:p.P222L,ENSP00000398846:p.P222L,ENSP00000269305:p.P222L							Cell cycle inhibitors, p53 gene therapy, immunotherapies, Wee1 inhibitors, Chk1 inhibitors			Inactivating mutations of TP53 predict poorer prognosis and increased recurrence in some cancers such as breast and bladder cancer.	Biallelic Inactivation	0	1	KEEP			null	null	COSM44606,COSM44606	8	3	central_nervous_system,haematopoietic_and_lymphoid_tissue,skin	57905	9443	41	NS,adrenal_gland,autonomic_ganglia,biliary_tract,bone,breast,central_nervous_system,cervix,endometrium,eye,fallopian_tube,gastrointestinal_tract_(site_indeterminate),genital_tract,haematopoietic_and_lymphoid_tissue,kidney,large_intestine,liver,lung,meninges,oesophagus,ovary,pancreas,paratesticular_tissues,penis,peritoneum,pituitary,placenta,pleura,prostate,salivary_gland,skin,small_intestine,soft…	p53, DNA-binding domain (1);p53-like transcription factor, DNA-binding (1);p53/RUNT-type transcription factor, DNA-binding domain (1);	LFS1,TP53,p53	0.0002	MODERATE	missense_variant	0.926
chr17	7578212	G	A	MAH_BTN-028	TP53	ENSP00000391127:p.R213*,ENSP00000410739:p.R213*,ENSP00000398846:p.R213*,ENSP00000269305:p.R213*							Cell cycle inhibitors, p53 gene therapy, immunotherapies, Wee1 inhibitors, Chk1 inhibitors			Inactivating mutations of TP53 predict poorer prognosis and increased recurrence in some cancers such as breast and bladder cancer.	Biallelic Inactivation	1	1	KEEP		Somatic	0.0061774	0.0061774	COSM10654,COSM1638393,COSM3378350,COSM99615,COSM99616,COSM99617,COSM99618,COSM10654,COSM1638393,COSM3378350,COSM99615,COSM99616,COSM99617,COSM99618,COSM10654,COSM1638393,COSM3378350,COSM99615,COSM99616,COSM99617,COSM99618,COSM10654,COSM1638393,COSM3378350,COSM99615,COSM99616,COSM99617,COSM99618	5192	24	NS,biliary_tract,bone,breast,central_nervous_system,endometrium,haematopoietic_and_lymphoid_tissue,kidn...,kidney,large_intestine,liver,lung,oesophagus,ovary,pancreas,prostate,salivary_gland,skin,small_intestine,soft_tissue,stomach,thyroid,upper_aerodigestive_tract,urinary_tract	57905	9443	41	NS,adrenal_gland,autonomic_ganglia,biliary_tract,bone,breast,central_nervous_system,cervix,endometrium,eye,fallopian_tube,gastrointestinal_tract_(site_indeterminate),genital_tract,haematopoietic_and_lymphoid_tissue,kidney,large_intestine,liver,lung,meninges,oesophagus,ovary,pancreas,paratesticular_tissues,penis,peritoneum,pituitary,placenta,pleura,prostate,salivary_gland,skin,small_intestine,soft…		LFS1,TP53,p53	1.50024e-05	HIGH	stop_gained	0
chr17	7578268	A	G	MAH_BTN-028	TP53	ENSP00000269305:p.L194P,ENSP00000391127:p.L194P,ENSP00000410739:p.L194P,ENSP00000398846:p.L194P							Cell cycle inhibitors, p53 gene therapy, immunotherapies, Wee1 inhibitors, Chk1 inhibitors			Inactivating mutations of TP53 predict poorer prognosis and increased recurrence in some cancers such as breast and bladder cancer.	Biallelic Inactivation	1	1	KEEP		Somatic	0.00026733	0.00026733	COSM3675531,COSM3675532,COSM437525,COSM437526,COSM437527,COSM437528,COSM43827	23	6	NS,breast,large_intestine,oesophagus,soft_tissue,stomach	57905	9443	41	NS,adrenal_gland,autonomic_ganglia,biliary_tract,bone,breast,central_nervous_system,cervix,endometrium,eye,fallopian_tube,gastrointestinal_tract_(site_indeterminate),genital_tract,haematopoietic_and_lymphoid_tissue,kidney,large_intestine,liver,lung,meninges,oesophagus,ovary,pancreas,paratesticular_tissues,penis,peritoneum,pituitary,placenta,pleura,prostate,salivary_gland,skin,small_intestine,soft…	p53, DNA-binding domain (1);p53-like transcription factor, DNA-binding (1);p53/RUNT-type transcription factor, DNA-binding domain (1);	LFS1,TP53,p53	0	MODERATE	missense_variant	1
chr17	7578506	GGCA	G	MAH_BTN-031	TP53	ENSP00000410739:p.TC140-141T,ENSP00000269305:p.TC140-141T,ENSP00000398846:p.TC140-141T,ENSP00000391127:p.TC140-141T							Cell cycle inhibitors, p53 gene therapy, immunotherapies, Wee1 inhibitors, Chk1 inhibitors			Inactivating mutations of TP53 predict poorer prognosis and increased recurrence in some cancers such as breast and bladder cancer.	Biallelic Inactivation	0	1			Somatic	1.0233e-14	1.0233e-14		null	null		57905	9443	41	NS,adrenal_gland,autonomic_ganglia,biliary_tract,bone,breast,central_nervous_system,cervix,endometrium,eye,fallopian_tube,gastrointestinal_tract_(site_indeterminate),genital_tract,haematopoietic_and_lymphoid_tissue,kidney,large_intestine,liver,lung,meninges,oesophagus,ovary,pancreas,paratesticular_tissues,penis,peritoneum,pituitary,placenta,pleura,prostate,salivary_gland,skin,small_intestine,soft…		LFS1,TP53,p53	0	MODERATE	inframe_deletion	0
chr17	7573991	C	A	MAH_BTN-033	TP53	ENSP00000410739:p.,ENSP00000391127:p.,ENSP00000398846:p.,ENSP00000269305:p.E346*							Cell cycle inhibitors, p53 gene therapy, immunotherapies, Wee1 inhibitors, Chk1 inhibitors			Inactivating mutations of TP53 predict poorer prognosis and increased recurrence in some cancers such as breast and bladder cancer.	Biallelic Inactivation	1	1	KEEP		Somatic	1.1508e-08	1.1508e-08	COSM1522201,COSM44083	6	3	adrenal_gland,pancreas,urinary_tract	57905	9443	41	NS,adrenal_gland,autonomic_ganglia,biliary_tract,bone,breast,central_nervous_system,cervix,endometrium,eye,fallopian_tube,gastrointestinal_tract_(site_indeterminate),genital_tract,haematopoietic_and_lymphoid_tissue,kidney,large_intestine,liver,lung,meninges,oesophagus,ovary,pancreas,paratesticular_tissues,penis,peritoneum,pituitary,placenta,pleura,prostate,salivary_gland,skin,small_intestine,soft…		LFS1,TP53,p53	0	HIGH	stop_gained	0
chr17	7572989	C	A	MAH_BTN-039	TP53	ENSP00000410739:p.,ENSP00000269305:p.G374C,ENSP00000391127:p.,ENSP00000398846:p.							Cell cycle inhibitors, p53 gene therapy, immunotherapies, Wee1 inhibitors, Chk1 inhibitors			Inactivating mutations of TP53 predict poorer prognosis and increased recurrence in some cancers such as breast and bladder cancer.	Biallelic Inactivation	1	1	KEEP		Somatic	6.6006e-07	6.6006e-07	COSM4984777,COSM4984778	2	1	oesophagus	57905	9443	41	NS,adrenal_gland,autonomic_ganglia,biliary_tract,bone,breast,central_nervous_system,cervix,endometrium,eye,fallopian_tube,gastrointestinal_tract_(site_indeterminate),genital_tract,haematopoietic_and_lymphoid_tissue,kidney,large_intestine,liver,lung,meninges,oesophagus,ovary,pancreas,paratesticular_tissues,penis,peritoneum,pituitary,placenta,pleura,prostate,salivary_gland,skin,small_intestine,soft…		LFS1,TP53,p53	1.49849e-05	MODERATE	missense_variant	0.992
chr17	7579529	C	T	MAH_BTN-039	TP53	ENSP00000269305:p.W53*,ENSP00000398846:p.W53*,ENSP00000391127:p.W53*,ENSP00000410739:p.W53*							Cell cycle inhibitors, p53 gene therapy, immunotherapies, Wee1 inhibitors, Chk1 inhibitors			Inactivating mutations of TP53 predict poorer prognosis and increased recurrence in some cancers such as breast and bladder cancer.	Biallelic Inactivation	1	1	KEEP		Somatic	0.00091169	0.00091169	COSM3388235,COSM3388236,COSM399760,COSM399761,COSM44760	63	11	biliary_tract,breast,central_nervous_system,liver,lung,oesophagus,ovary,pancreas,salivary_gland,skin,upper_aerodigestive_tract	57905	9443	41	NS,adrenal_gland,autonomic_ganglia,biliary_tract,bone,breast,central_nervous_system,cervix,endometrium,eye,fallopian_tube,gastrointestinal_tract_(site_indeterminate),genital_tract,haematopoietic_and_lymphoid_tissue,kidney,large_intestine,liver,lung,meninges,oesophagus,ovary,pancreas,paratesticular_tissues,penis,peritoneum,pituitary,placenta,pleura,prostate,salivary_gland,skin,small_intestine,soft…		LFS1,TP53,p53	0	HIGH	stop_gained	0
chr17	7577499	C	G	MAH_BTN-040	TP53	ENSP00000398846:p.S261T,ENSP00000269305:p.S261T,ENSP00000391127:p.S261T,ENSP00000410739:p.R261T							Cell cycle inhibitors, p53 gene therapy, immunotherapies, Wee1 inhibitors, Chk1 inhibitors			Inactivating mutations of TP53 predict poorer prognosis and increased recurrence in some cancers such as breast and bladder cancer.	Biallelic Inactivation	0	1	KEEP			null	null	COSM1236173,COSM1236174,COSM19471	5	1	haematopoietic_and_lymphoid_tissue	57905	9443	41	NS,adrenal_gland,autonomic_ganglia,biliary_tract,bone,breast,central_nervous_system,cervix,endometrium,eye,fallopian_tube,gastrointestinal_tract_(site_indeterminate),genital_tract,haematopoietic_and_lymphoid_tissue,kidney,large_intestine,liver,lung,meninges,oesophagus,ovary,pancreas,paratesticular_tissues,penis,peritoneum,pituitary,placenta,pleura,prostate,salivary_gland,skin,small_intestine,soft…	p53, DNA-binding domain (1);p53-like transcription factor, DNA-binding (1);p53/RUNT-type transcription factor, DNA-binding domain (1);	LFS1,TP53,p53	0	MODERATE	missense_variant	0.998
chr17	7578370	C	T	MAH_BTN-041	TP53	ENSP00000391127:p.,ENSP00000410739:p.,ENSP00000398846:p.,ENSP00000269305:p.							Cell cycle inhibitors, p53 gene therapy, immunotherapies, Wee1 inhibitors, Chk1 inhibitors			Inactivating mutations of TP53 predict poorer prognosis and increased recurrence in some cancers such as breast and bladder cancer.	Biallelic Inactivation	1	1	KEEP		Somatic	5.8079e-10	5.8079e-10	COSM131534,COSM131535,COSM131536,COSM131537,COSM2744800,COSM3388354,COSM6901	132	13	NS,bone,breast,haematopoietic_and_lymphoid_tissue,large_intestine,liver,oesophagus,ovary,pancreas,skin,soft_tissue,stomach,upper_aerodigestive_tract	57905	9443	41	NS,adrenal_gland,autonomic_ganglia,biliary_tract,bone,breast,central_nervous_system,cervix,endometrium,eye,fallopian_tube,gastrointestinal_tract_(site_indeterminate),genital_tract,haematopoietic_and_lymphoid_tissue,kidney,large_intestine,liver,lung,meninges,oesophagus,ovary,pancreas,paratesticular_tissues,penis,peritoneum,pituitary,placenta,pleura,prostate,salivary_gland,skin,small_intestine,soft…		LFS1,TP53,p53	0	HIGH	splice_donor_variant	0
chr17	7578212	G	A	MAH_BTN-043	TP53	ENSP00000391127:p.R213*,ENSP00000410739:p.R213*,ENSP00000398846:p.R213*,ENSP00000269305:p.R213*							Cell cycle inhibitors, p53 gene therapy, immunotherapies, Wee1 inhibitors, Chk1 inhibitors			Inactivating mutations of TP53 predict poorer prognosis and increased recurrence in some cancers such as breast and bladder cancer.	Biallelic Inactivation	1	1	KEEP		Somatic	2.781e-14	2.781e-14	COSM10654,COSM1638393,COSM3378350,COSM99615,COSM99616,COSM99617,COSM99618,COSM10654,COSM1638393,COSM3378350,COSM99615,COSM99616,COSM99617,COSM99618,COSM10654,COSM1638393,COSM3378350,COSM99615,COSM99616,COSM99617,COSM99618,COSM10654,COSM1638393,COSM3378350,COSM99615,COSM99616,COSM99617,COSM99618	5192	24	NS,biliary_tract,bone,breast,central_nervous_system,endometrium,haematopoietic_and_lymphoid_tissue,kidn...,kidney,large_intestine,liver,lung,oesophagus,ovary,pancreas,prostate,salivary_gland,skin,small_intestine,soft_tissue,stomach,thyroid,upper_aerodigestive_tract,urinary_tract	57905	9443	41	NS,adrenal_gland,autonomic_ganglia,biliary_tract,bone,breast,central_nervous_system,cervix,endometrium,eye,fallopian_tube,gastrointestinal_tract_(site_indeterminate),genital_tract,haematopoietic_and_lymphoid_tissue,kidney,large_intestine,liver,lung,meninges,oesophagus,ovary,pancreas,paratesticular_tissues,penis,peritoneum,pituitary,placenta,pleura,prostate,salivary_gland,skin,small_intestine,soft…		LFS1,TP53,p53	1.50024e-05	HIGH	stop_gained	0
chr17	7579378	G	T	MAH_BTN-044	TP53	ENSP00000398846:p.Y103*,ENSP00000269305:p.Y103*,ENSP00000410739:p.Y103*,ENSP00000391127:p.Y103*							Cell cycle inhibitors, p53 gene therapy, immunotherapies, Wee1 inhibitors, Chk1 inhibitors			Inactivating mutations of TP53 predict poorer prognosis and increased recurrence in some cancers such as breast and bladder cancer.	Biallelic Inactivation	0	1	KEEP			null	null	COSM1646882,COSM45307,COSM4749462,COSM707858,COSM707859	20	6	breast,endometrium,lung,oesophagus,salivary_gland,stomach	57905	9443	41	NS,adrenal_gland,autonomic_ganglia,biliary_tract,bone,breast,central_nervous_system,cervix,endometrium,eye,fallopian_tube,gastrointestinal_tract_(site_indeterminate),genital_tract,haematopoietic_and_lymphoid_tissue,kidney,large_intestine,liver,lung,meninges,oesophagus,ovary,pancreas,paratesticular_tissues,penis,peritoneum,pituitary,placenta,pleura,prostate,salivary_gland,skin,small_intestine,soft…		LFS1,TP53,p53	0	HIGH	stop_gained	0
chr17	7578406	C	T	MAH_BTN-046	TP53	ENSP00000391127:p.R175H,ENSP00000398846:p.R175H,ENSP00000269305:p.R175H,ENSP00000410739:p.R175H							Cell cycle inhibitors, p53 gene therapy, immunotherapies, Wee1 inhibitors, Chk1 inhibitors			Inactivating mutations of TP53 predict poorer prognosis and increased recurrence in some cancers such as breast and bladder cancer.	Biallelic Inactivation	1	1	KEEP		Somatic	4.5386e-12	4.5386e-12	COSM10648,COSM1640851,COSM3355994,COSM99022,COSM99023,COSM99024,COSM99914,COSM10648,COSM1640851,COSM3355994,COSM99022,COSM99023,COSM99024,COSM99914,COSM10648,COSM1640851,COSM3355994,COSM99022,COSM99023,COSM99024,COSM99914,COSM10648,COSM1640851,COSM3355994,COSM99022,COSM99023,COSM99024,COSM99914,COSM10648,COSM1640851,COSM3355994,COSM99022,COSM99023,COSM99024,COSM99914,COSM10648,COSM1640851,COSM335…	17958	29	...,NS,adrenal_gland,biliary_tract,bone,breast,central_nervous_system,cervix,endometrium,haematopoietic_and_lymphoid_tissue,kidney,large_intestine,liver,lung,oesophagus,ovary,pancreas,penis,peritoneum,prostate,salivary_gland,skin,small_intestine,soft_tissue,stomach,thyroid,upper_aerodigestive_tract,urinary_tract,vulva	57905	9443	41	NS,adrenal_gland,autonomic_ganglia,biliary_tract,bone,breast,central_nervous_system,cervix,endometrium,eye,fallopian_tube,gastrointestinal_tract_(site_indeterminate),genital_tract,haematopoietic_and_lymphoid_tissue,kidney,large_intestine,liver,lung,meninges,oesophagus,ovary,pancreas,paratesticular_tissues,penis,peritoneum,pituitary,placenta,pleura,prostate,salivary_gland,skin,small_intestine,soft…	p53, DNA-binding domain (1);p53-like transcription factor, DNA-binding (1);p53/RUNT-type transcription factor, DNA-binding domain (1);	LFS1,TP53,p53	1.49934e-05	MODERATE	missense_variant	1
chr17	7577568	C	T	MAH_BTN-047	TP53	ENSP00000269305:p.C238Y,ENSP00000410739:p.C238Y,ENSP00000391127:p.C238Y,ENSP00000398846:p.C238Y							Cell cycle inhibitors, p53 gene therapy, immunotherapies, Wee1 inhibitors, Chk1 inhibitors			Inactivating mutations of TP53 predict poorer prognosis and increased recurrence in some cancers such as breast and bladder cancer.	Biallelic Inactivation	1	1	KEEP		Somatic	5.5097e-10	5.5097e-10	COSM11059,COSM1649400,COSM179811,COSM179812,COSM179813,COSM3388191	234	14	bone,breast,central_nervous_system,endometrium,haematopoietic_and_lymphoid_tissue,large_intestine,lung,oesophagus,ovary,pancreas,skin,soft_tissue,stomach,upper_aerodigestive_tract	57905	9443	41	NS,adrenal_gland,autonomic_ganglia,biliary_tract,bone,breast,central_nervous_system,cervix,endometrium,eye,fallopian_tube,gastrointestinal_tract_(site_indeterminate),genital_tract,haematopoietic_and_lymphoid_tissue,kidney,large_intestine,liver,lung,meninges,oesophagus,ovary,pancreas,paratesticular_tissues,penis,peritoneum,pituitary,placenta,pleura,prostate,salivary_gland,skin,small_intestine,soft…	p53, DNA-binding domain (1);p53-like transcription factor, DNA-binding (1);p53/RUNT-type transcription factor, DNA-binding domain (1);	LFS1,TP53,p53	2.99688e-05	MODERATE	missense_variant	1
chr17	7576852	C	A	MAH_BTN-048	TP53	ENSP00000269305:p.,ENSP00000410739:p.,ENSP00000391127:p.,ENSP00000398846:p.							Cell cycle inhibitors, p53 gene therapy, immunotherapies, Wee1 inhibitors, Chk1 inhibitors			Inactivating mutations of TP53 predict poorer prognosis and increased recurrence in some cancers such as breast and bladder cancer.	Biallelic Inactivation	0	1	KEEP			null	null	COSM2744450,COSM323936,COSM4271709,COSM6918	31	8	biliary_tract,breast,haematopoietic_and_lymphoid_tissue,large_intestine,lung,oesophagus,ovary,pancreas	57905	9443	41	NS,adrenal_gland,autonomic_ganglia,biliary_tract,bone,breast,central_nervous_system,cervix,endometrium,eye,fallopian_tube,gastrointestinal_tract_(site_indeterminate),genital_tract,haematopoietic_and_lymphoid_tissue,kidney,large_intestine,liver,lung,meninges,oesophagus,ovary,pancreas,paratesticular_tissues,penis,peritoneum,pituitary,placenta,pleura,prostate,salivary_gland,skin,small_intestine,soft…		LFS1,TP53,p53	0	HIGH	splice_donor_variant	0
chr17	7577609	C	T	MAH_BTN-049	TP53	ENSP00000410739:p.,ENSP00000391127:p.,ENSP00000398846:p.,ENSP00000269305:p.							Cell cycle inhibitors, p53 gene therapy, immunotherapies, Wee1 inhibitors, Chk1 inhibitors			Inactivating mutations of TP53 predict poorer prognosis and increased recurrence in some cancers such as breast and bladder cancer.	Biallelic Inactivation	1	1	KEEP		Somatic	4.2836e-05	4.2836e-05	COSM131547,COSM131548,COSM131549,COSM1725566,COSM3378445,COSM43751	59	10	biliary_tract,breast,central_nervous_system,haematopoietic_and_lymphoid_tissue,liver,oesophagus,ovary,pancreas,skin,upper_aerodigestive_tract	57905	9443	41	NS,adrenal_gland,autonomic_ganglia,biliary_tract,bone,breast,central_nervous_system,cervix,endometrium,eye,fallopian_tube,gastrointestinal_tract_(site_indeterminate),genital_tract,haematopoietic_and_lymphoid_tissue,kidney,large_intestine,liver,lung,meninges,oesophagus,ovary,pancreas,paratesticular_tissues,penis,peritoneum,pituitary,placenta,pleura,prostate,salivary_gland,skin,small_intestine,soft…		LFS1,TP53,p53	0	HIGH	splice_acceptor_variant	0
chr17	7578525	G	T	MAH_BTN-050	TP53	ENSP00000410739:p.C135*,ENSP00000391127:p.C135*,ENSP00000398846:p.C135*,ENSP00000269305:p.C135*							Cell cycle inhibitors, p53 gene therapy, immunotherapies, Wee1 inhibitors, Chk1 inhibitors			Inactivating mutations of TP53 predict poorer prognosis and increased recurrence in some cancers such as breast and bladder cancer.	Biallelic Inactivation	1	1	KEEP		Somatic	3.3217e-07	3.3217e-07	COSM44319,COSM4888145,COSM4888146,COSM4888147,COSM4888148,COSM4888149,COSM4888150	36	8	large_intestine,liver,lung,prostate,skin,upper_aerodigestive_tract,urinary_tract,vulva	57905	9443	41	NS,adrenal_gland,autonomic_ganglia,biliary_tract,bone,breast,central_nervous_system,cervix,endometrium,eye,fallopian_tube,gastrointestinal_tract_(site_indeterminate),genital_tract,haematopoietic_and_lymphoid_tissue,kidney,large_intestine,liver,lung,meninges,oesophagus,ovary,pancreas,paratesticular_tissues,penis,peritoneum,pituitary,placenta,pleura,prostate,salivary_gland,skin,small_intestine,soft…		LFS1,TP53,p53	0	HIGH	stop_gained	0
chr17	7577568	C	A	MAH_BTN-051	TP53	ENSP00000398846:p.C238F,ENSP00000269305:p.C238F,ENSP00000410739:p.C238F,ENSP00000391127:p.C238F							Cell cycle inhibitors, p53 gene therapy, immunotherapies, Wee1 inhibitors, Chk1 inhibitors			Inactivating mutations of TP53 predict poorer prognosis and increased recurrence in some cancers such as breast and bladder cancer.	Biallelic Inactivation	1	1	KEEP		Somatic	2.0235e-14	2.0235e-14	COSM2744631,COSM3403263,COSM43778,COSM99624,COSM99625,COSM99626	154	19	biliary_tract,breast,central_nervous_system,cervix,endometrium,haematopoietic_and_lymphoid_tissue,large_intestine,liver,lung,meninges,oesophagus,ovary,prostate,salivary_gland,skin,soft_tissue,stomach,upper_aerodigestive_tract,urinary_tract	57905	9443	41	NS,adrenal_gland,autonomic_ganglia,biliary_tract,bone,breast,central_nervous_system,cervix,endometrium,eye,fallopian_tube,gastrointestinal_tract_(site_indeterminate),genital_tract,haematopoietic_and_lymphoid_tissue,kidney,large_intestine,liver,lung,meninges,oesophagus,ovary,pancreas,paratesticular_tissues,penis,peritoneum,pituitary,placenta,pleura,prostate,salivary_gland,skin,small_intestine,soft…	p53, DNA-binding domain (1);p53-like transcription factor, DNA-binding (1);p53/RUNT-type transcription factor, DNA-binding domain (1);	LFS1,TP53,p53	0	MODERATE	missense_variant	1
chr17	7578291	T	C	MAH_BTN-052	TP53	ENSP00000391127:p.,ENSP00000410739:p.,ENSP00000269305:p.,ENSP00000398846:p.							Cell cycle inhibitors, p53 gene therapy, immunotherapies, Wee1 inhibitors, Chk1 inhibitors			Inactivating mutations of TP53 predict poorer prognosis and increased recurrence in some cancers such as breast and bladder cancer.	Biallelic Inactivation	1	1	KEEP		Somatic	1.1256e-21	1.1256e-21	COSM1679503,COSM1679504,COSM1679505,COSM1679506,COSM1679507,COSM18657,COSM3773307	38	8	central_nervous_system,kidney,liver,lung,oesophagus,ovary,pancreas,thyroid	57905	9443	41	NS,adrenal_gland,autonomic_ganglia,biliary_tract,bone,breast,central_nervous_system,cervix,endometrium,eye,fallopian_tube,gastrointestinal_tract_(site_indeterminate),genital_tract,haematopoietic_and_lymphoid_tissue,kidney,large_intestine,liver,lung,meninges,oesophagus,ovary,pancreas,paratesticular_tissues,penis,peritoneum,pituitary,placenta,pleura,prostate,salivary_gland,skin,small_intestine,soft…		LFS1,TP53,p53	0	HIGH	splice_acceptor_variant	0
chr17	7578263	G	A	MAH_BTN-053	TP53	ENSP00000410739:p.R196*,ENSP00000391127:p.R196*,ENSP00000398846:p.R196*,ENSP00000269305:p.R196*							Cell cycle inhibitors, p53 gene therapy, immunotherapies, Wee1 inhibitors, Chk1 inhibitors			Inactivating mutations of TP53 predict poorer prognosis and increased recurrence in some cancers such as breast and bladder cancer.	Biallelic Inactivation	1	1	KEEP		Somatic	1.7361e-15	1.7361e-15	COSM10705,COSM1640847,COSM3378446,COSM99665,COSM99666,COSM99667,COSM99668	906	20	NS,biliary_tract,breast,central_nervous_system,cervix,endometrium,haematopoietic_and_lymphoid_tissue,kidney,large_intestine,liver,lung,oesophagus,ova...,ovary,pancreas,skin,soft_tissue,stomach,upper_aerodigestive_tract,urinary_tract	57905	9443	41	NS,adrenal_gland,autonomic_ganglia,biliary_tract,bone,breast,central_nervous_system,cervix,endometrium,eye,fallopian_tube,gastrointestinal_tract_(site_indeterminate),genital_tract,haematopoietic_and_lymphoid_tissue,kidney,large_intestine,liver,lung,meninges,oesophagus,ovary,pancreas,paratesticular_tissues,penis,peritoneum,pituitary,placenta,pleura,prostate,salivary_gland,skin,small_intestine,soft…		LFS1,TP53,p53	1.49876e-05	HIGH	stop_gained	0
chr17	7578534	CTTG	C	MAH_BTN-058	TP53	ENSP00000398846:p.LN130-131L,ENSP00000391127:p.LN130-131L,ENSP00000410739:p.LN130-131L,ENSP00000269305:p.LN130-131L							Cell cycle inhibitors, p53 gene therapy, immunotherapies, Wee1 inhibitors, Chk1 inhibitors			Inactivating mutations of TP53 predict poorer prognosis and increased recurrence in some cancers such as breast and bladder cancer.	Biallelic Inactivation	0	1			Somatic	2.1727e-19	2.1727e-19	COSM1290767,COSM1290768,COSM1290769,COSM44589,COSM4735424,COSM4735425,COSM44212,COSM4968986,COSM4968987,COSM4968988,COSM4968989,COSM4968990,COSM4968991	34	10	breast,central_nervous_system,endometrium,haematopoietic_and_lymphoid_tissue,kidney,large_intestine,liver,lung,oesophagus,ovary	57905	9443	41	NS,adrenal_gland,autonomic_ganglia,biliary_tract,bone,breast,central_nervous_system,cervix,endometrium,eye,fallopian_tube,gastrointestinal_tract_(site_indeterminate),genital_tract,haematopoietic_and_lymphoid_tissue,kidney,large_intestine,liver,lung,meninges,oesophagus,ovary,pancreas,paratesticular_tissues,penis,peritoneum,pituitary,placenta,pleura,prostate,salivary_gland,skin,small_intestine,soft…		LFS1,TP53,p53	0	MODERATE	inframe_deletion	0
chr17	7579470	CG	C	MAH_BTN-059	TP53	ENSP00000398846:p.P71X,ENSP00000391127:p.P71X,ENSP00000410739:p.P71X,ENSP00000269305:p.P71X							Cell cycle inhibitors, p53 gene therapy, immunotherapies, Wee1 inhibitors, Chk1 inhibitors			Inactivating mutations of TP53 predict poorer prognosis and increased recurrence in some cancers such as breast and bladder cancer.	Biallelic Inactivation	0	1			Somatic	0.00012413	0.00012413	COSM1268331,COSM1268332,COSM18569,COSM2745091,COSM4336302,COSM5731057,COSM44256,COSM46307	51	8	breast,endometrium,haematopoietic_and_lymphoid_tissue,large_intestine,lung,prostate,soft_tissue,stomach	57905	9443	41	NS,adrenal_gland,autonomic_ganglia,biliary_tract,bone,breast,central_nervous_system,cervix,endometrium,eye,fallopian_tube,gastrointestinal_tract_(site_indeterminate),genital_tract,haematopoietic_and_lymphoid_tissue,kidney,large_intestine,liver,lung,meninges,oesophagus,ovary,pancreas,paratesticular_tissues,penis,peritoneum,pituitary,placenta,pleura,prostate,salivary_gland,skin,small_intestine,soft…		LFS1,TP53,p53	0	HIGH	frameshift_variant	0
chr17	7578272	G	T	MAH_BTN-060	TP53	ENSP00000410739:p.H193N,ENSP00000391127:p.H193N,ENSP00000398846:p.H193N,ENSP00000269305:p.H193N							Cell cycle inhibitors, p53 gene therapy, immunotherapies, Wee1 inhibitors, Chk1 inhibitors			Inactivating mutations of TP53 predict poorer prognosis and increased recurrence in some cancers such as breast and bladder cancer.	Biallelic Inactivation	1	1	KEEP		Somatic	1.6451e-08	1.6451e-08	COSM3958821,COSM3958822,COSM3958823,COSM3958824,COSM3958825,COSM3958826,COSM43935	26	6	biliary_tract,haematopoietic_and_lymphoid_tissue,large_intestine,lung,oesophagus,stomach	57905	9443	41	NS,adrenal_gland,autonomic_ganglia,biliary_tract,bone,breast,central_nervous_system,cervix,endometrium,eye,fallopian_tube,gastrointestinal_tract_(site_indeterminate),genital_tract,haematopoietic_and_lymphoid_tissue,kidney,large_intestine,liver,lung,meninges,oesophagus,ovary,pancreas,paratesticular_tissues,penis,peritoneum,pituitary,placenta,pleura,prostate,salivary_gland,skin,small_intestine,soft…	p53, DNA-binding domain (1);p53-like transcription factor, DNA-binding (1);p53/RUNT-type transcription factor, DNA-binding domain (1);	LFS1,TP53,p53	0	MODERATE	missense_variant	1
chr17	7577141	C	T	MAH_BTN-061	TP53	ENSP00000391127:p.G266E,ENSP00000398846:p.G266E,ENSP00000269305:p.G266E,ENSP00000410739:p.							Cell cycle inhibitors, p53 gene therapy, immunotherapies, Wee1 inhibitors, Chk1 inhibitors			Inactivating mutations of TP53 predict poorer prognosis and increased recurrence in some cancers such as breast and bladder cancer.	Biallelic Inactivation	1	1	KEEP		Somatic	2.1506e-05	2.1506e-05	COSM10867,COSM1679491,COSM216410,COSM3388174	157	23	NS,biliary_tract,breast,central_nervous_system,cervix,endometrium,genital_tract,haematopoietic_and_lymphoid_tissue,large_intestine,liver,lung,oesophagus,ovary,pancreas,prostate,skin,small_intestine,soft_tissue,stomach,thyroid,upper_aerodigestive_tract,urinary_tract,vulva	57905	9443	41	NS,adrenal_gland,autonomic_ganglia,biliary_tract,bone,breast,central_nervous_system,cervix,endometrium,eye,fallopian_tube,gastrointestinal_tract_(site_indeterminate),genital_tract,haematopoietic_and_lymphoid_tissue,kidney,large_intestine,liver,lung,meninges,oesophagus,ovary,pancreas,paratesticular_tissues,penis,peritoneum,pituitary,placenta,pleura,prostate,salivary_gland,skin,small_intestine,soft…	p53, DNA-binding domain (1);p53-like transcription factor, DNA-binding (1);p53/RUNT-type transcription factor, DNA-binding domain (1);	LFS1,TP53,p53	0	MODERATE	missense_variant	1
chr17	7576855	G	A	MAH_BTN-062	TP53	ENSP00000398846:p.Q331*,ENSP00000269305:p.Q331*,ENSP00000391127:p.Q331*,ENSP00000410739:p.							Cell cycle inhibitors, p53 gene therapy, immunotherapies, Wee1 inhibitors, Chk1 inhibitors			Inactivating mutations of TP53 predict poorer prognosis and increased recurrence in some cancers such as breast and bladder cancer.	Biallelic Inactivation	1	1	KEEP		Somatic	3.9837e-09	3.9837e-09	COSM11354,COSM1649348,COSM289612,COSM3522688	136	15	biliary_tract,breast,endometrium,haematopoietic_and_lymphoid_tissue,large_intestine,liver,lung,oesophagus,ovary,pancreas,pleura,skin,stomach,upper_aerodigestive_tract,urinary_tract	57905	9443	41	NS,adrenal_gland,autonomic_ganglia,biliary_tract,bone,breast,central_nervous_system,cervix,endometrium,eye,fallopian_tube,gastrointestinal_tract_(site_indeterminate),genital_tract,haematopoietic_and_lymphoid_tissue,kidney,large_intestine,liver,lung,meninges,oesophagus,ovary,pancreas,paratesticular_tissues,penis,peritoneum,pituitary,placenta,pleura,prostate,salivary_gland,skin,small_intestine,soft…		LFS1,TP53,p53	0	HIGH	stop_gained	0
chr17	7578203	C	T	MAH_BTN-064	TP53	ENSP00000410739:p.V216M,ENSP00000391127:p.V216M,ENSP00000398846:p.V216M,ENSP00000269305:p.V216M							Cell cycle inhibitors, p53 gene therapy, immunotherapies, Wee1 inhibitors, Chk1 inhibitors			Inactivating mutations of TP53 predict poorer prognosis and increased recurrence in some cancers such as breast and bladder cancer.	Biallelic Inactivation	1	1	KEEP		Somatic	0.00028966	0.00028966	COSM10667,COSM120095,COSM120096,COSM120097,COSM120098,COSM1644280,COSM3388195,COSM10667,COSM120095,COSM120096,COSM120097,COSM120098,COSM1644280,COSM3388195	552	17	...,bone,breast,central_nervous_system,endometrium,haematopoietic_and_lymphoid_tissue,large_intestine,liver,lung,oesophagus,ovary,pancreas,salivary_gland,soft_tissue,stomach,upper_aerodigestive_tract,vulva	57905	9443	41	NS,adrenal_gland,autonomic_ganglia,biliary_tract,bone,breast,central_nervous_system,cervix,endometrium,eye,fallopian_tube,gastrointestinal_tract_(site_indeterminate),genital_tract,haematopoietic_and_lymphoid_tissue,kidney,large_intestine,liver,lung,meninges,oesophagus,ovary,pancreas,paratesticular_tissues,penis,peritoneum,pituitary,placenta,pleura,prostate,salivary_gland,skin,small_intestine,soft…	p53, DNA-binding domain (1);p53-like transcription factor, DNA-binding (1);p53/RUNT-type transcription factor, DNA-binding domain (1);	LFS1,TP53,p53	0	MODERATE	missense_variant	1
chr17	7577105	G	C	MAH_BTN-065	TP53	ENSP00000398846:p.P278R,ENSP00000269305:p.P278R,ENSP00000391127:p.P278R,ENSP00000410739:p.							Cell cycle inhibitors, p53 gene therapy, immunotherapies, Wee1 inhibitors, Chk1 inhibitors			Inactivating mutations of TP53 predict poorer prognosis and increased recurrence in some cancers such as breast and bladder cancer.	Biallelic Inactivation	1	1	KEEP		Somatic	4.0229e-32	4.0229e-32	COSM10887,COSM1646811,COSM300205,COSM3773296	57	10	breast,haematopoietic_and_lymphoid_tissue,large_intestine,lung,oesophagus,ovary,pancreas,skin,stomach,upper_aerodigestive_tract	57905	9443	41	NS,adrenal_gland,autonomic_ganglia,biliary_tract,bone,breast,central_nervous_system,cervix,endometrium,eye,fallopian_tube,gastrointestinal_tract_(site_indeterminate),genital_tract,haematopoietic_and_lymphoid_tissue,kidney,large_intestine,liver,lung,meninges,oesophagus,ovary,pancreas,paratesticular_tissues,penis,peritoneum,pituitary,placenta,pleura,prostate,salivary_gland,skin,small_intestine,soft…	p53, DNA-binding domain (1);p53-like transcription factor, DNA-binding (1);p53/RUNT-type transcription factor, DNA-binding domain (1);	LFS1,TP53,p53	0	MODERATE	missense_variant	1
chr17	7578406	C	T	MAH_BTN-066	TP53	ENSP00000391127:p.R175H,ENSP00000398846:p.R175H,ENSP00000269305:p.R175H,ENSP00000410739:p.R175H							Cell cycle inhibitors, p53 gene therapy, immunotherapies, Wee1 inhibitors, Chk1 inhibitors			Inactivating mutations of TP53 predict poorer prognosis and increased recurrence in some cancers such as breast and bladder cancer.	Biallelic Inactivation	1	1	KEEP		Somatic	7.3051e-25	7.3051e-25	COSM10648,COSM1640851,COSM3355994,COSM99022,COSM99023,COSM99024,COSM99914,COSM10648,COSM1640851,COSM3355994,COSM99022,COSM99023,COSM99024,COSM99914,COSM10648,COSM1640851,COSM3355994,COSM99022,COSM99023,COSM99024,COSM99914,COSM10648,COSM1640851,COSM3355994,COSM99022,COSM99023,COSM99024,COSM99914,COSM10648,COSM1640851,COSM3355994,COSM99022,COSM99023,COSM99024,COSM99914,COSM10648,COSM1640851,COSM335…	17958	29	...,NS,adrenal_gland,biliary_tract,bone,breast,central_nervous_system,cervix,endometrium,haematopoietic_and_lymphoid_tissue,kidney,large_intestine,liver,lung,oesophagus,ovary,pancreas,penis,peritoneum,prostate,salivary_gland,skin,small_intestine,soft_tissue,stomach,thyroid,upper_aerodigestive_tract,urinary_tract,vulva	57905	9443	41	NS,adrenal_gland,autonomic_ganglia,biliary_tract,bone,breast,central_nervous_system,cervix,endometrium,eye,fallopian_tube,gastrointestinal_tract_(site_indeterminate),genital_tract,haematopoietic_and_lymphoid_tissue,kidney,large_intestine,liver,lung,meninges,oesophagus,ovary,pancreas,paratesticular_tissues,penis,peritoneum,pituitary,placenta,pleura,prostate,salivary_gland,skin,small_intestine,soft…	p53, DNA-binding domain (1);p53-like transcription factor, DNA-binding (1);p53/RUNT-type transcription factor, DNA-binding domain (1);	LFS1,TP53,p53	1.49934e-05	MODERATE	missense_variant	1
chr17	7578406	C	T	MAH_BTN-069	TP53	ENSP00000391127:p.R175H,ENSP00000398846:p.R175H,ENSP00000269305:p.R175H,ENSP00000410739:p.R175H							Cell cycle inhibitors, p53 gene therapy, immunotherapies, Wee1 inhibitors, Chk1 inhibitors			Inactivating mutations of TP53 predict poorer prognosis and increased recurrence in some cancers such as breast and bladder cancer.	Biallelic Inactivation	1	1	KEEP		Somatic	2.1273e-14	2.1273e-14	COSM10648,COSM1640851,COSM3355994,COSM99022,COSM99023,COSM99024,COSM99914,COSM10648,COSM1640851,COSM3355994,COSM99022,COSM99023,COSM99024,COSM99914,COSM10648,COSM1640851,COSM3355994,COSM99022,COSM99023,COSM99024,COSM99914,COSM10648,COSM1640851,COSM3355994,COSM99022,COSM99023,COSM99024,COSM99914,COSM10648,COSM1640851,COSM3355994,COSM99022,COSM99023,COSM99024,COSM99914,COSM10648,COSM1640851,COSM335…	17958	29	...,NS,adrenal_gland,biliary_tract,bone,breast,central_nervous_system,cervix,endometrium,haematopoietic_and_lymphoid_tissue,kidney,large_intestine,liver,lung,oesophagus,ovary,pancreas,penis,peritoneum,prostate,salivary_gland,skin,small_intestine,soft_tissue,stomach,thyroid,upper_aerodigestive_tract,urinary_tract,vulva	57905	9443	41	NS,adrenal_gland,autonomic_ganglia,biliary_tract,bone,breast,central_nervous_system,cervix,endometrium,eye,fallopian_tube,gastrointestinal_tract_(site_indeterminate),genital_tract,haematopoietic_and_lymphoid_tissue,kidney,large_intestine,liver,lung,meninges,oesophagus,ovary,pancreas,paratesticular_tissues,penis,peritoneum,pituitary,placenta,pleura,prostate,salivary_gland,skin,small_intestine,soft…	p53, DNA-binding domain (1);p53-like transcription factor, DNA-binding (1);p53/RUNT-type transcription factor, DNA-binding domain (1);	LFS1,TP53,p53	1.49934e-05	MODERATE	missense_variant	1
chr17	7578212	G	A	MAH_BTN-070	TP53	ENSP00000391127:p.R213*,ENSP00000410739:p.R213*,ENSP00000398846:p.R213*,ENSP00000269305:p.R213*							Cell cycle inhibitors, p53 gene therapy, immunotherapies, Wee1 inhibitors, Chk1 inhibitors			Inactivating mutations of TP53 predict poorer prognosis and increased recurrence in some cancers such as breast and bladder cancer.	Biallelic Inactivation	1	1	KEEP		Somatic	4.0826e-18	4.0826e-18	COSM10654,COSM1638393,COSM3378350,COSM99615,COSM99616,COSM99617,COSM99618,COSM10654,COSM1638393,COSM3378350,COSM99615,COSM99616,COSM99617,COSM99618,COSM10654,COSM1638393,COSM3378350,COSM99615,COSM99616,COSM99617,COSM99618,COSM10654,COSM1638393,COSM3378350,COSM99615,COSM99616,COSM99617,COSM99618	5192	24	NS,biliary_tract,bone,breast,central_nervous_system,endometrium,haematopoietic_and_lymphoid_tissue,kidn...,kidney,large_intestine,liver,lung,oesophagus,ovary,pancreas,prostate,salivary_gland,skin,small_intestine,soft_tissue,stomach,thyroid,upper_aerodigestive_tract,urinary_tract	57905	9443	41	NS,adrenal_gland,autonomic_ganglia,biliary_tract,bone,breast,central_nervous_system,cervix,endometrium,eye,fallopian_tube,gastrointestinal_tract_(site_indeterminate),genital_tract,haematopoietic_and_lymphoid_tissue,kidney,large_intestine,liver,lung,meninges,oesophagus,ovary,pancreas,paratesticular_tissues,penis,peritoneum,pituitary,placenta,pleura,prostate,salivary_gland,skin,small_intestine,soft…		LFS1,TP53,p53	1.50024e-05	HIGH	stop_gained	0
chr17	7578268	A	C	MAH_BTN-073	TP53	ENSP00000398846:p.L194R,ENSP00000269305:p.L194R,ENSP00000410739:p.L194R,ENSP00000391127:p.L194R							Cell cycle inhibitors, p53 gene therapy, immunotherapies, Wee1 inhibitors, Chk1 inhibitors			Inactivating mutations of TP53 predict poorer prognosis and increased recurrence in some cancers such as breast and bladder cancer.	Biallelic Inactivation	1	1	KEEP		Somatic	0.00074518	0.00074518	COSM117647,COSM117648,COSM117649,COSM117650,COSM1649391,COSM3403268,COSM44571,COSM117647,COSM117648,COSM117649,COSM117650,COSM1649391,COSM3403268,COSM44571	458	15	breast,central_nervous_system,haem...,haematopoietic_and_lymphoid_tissue,large_intestine,liver,lung,oesophagus,ovary,pancreas,salivary_gland,skin,stomach,upper_aerodigestive_tract,urinary_tract	57905	9443	41	NS,adrenal_gland,autonomic_ganglia,biliary_tract,bone,breast,central_nervous_system,cervix,endometrium,eye,fallopian_tube,gastrointestinal_tract_(site_indeterminate),genital_tract,haematopoietic_and_lymphoid_tissue,kidney,large_intestine,liver,lung,meninges,oesophagus,ovary,pancreas,paratesticular_tissues,penis,peritoneum,pituitary,placenta,pleura,prostate,salivary_gland,skin,small_intestine,soft…	p53, DNA-binding domain (1);p53-like transcription factor, DNA-binding (1);p53/RUNT-type transcription factor, DNA-binding domain (1);	LFS1,TP53,p53	0	MODERATE	missense_variant	1
chr17	7578290	C	T	MAH_BTN-074	TP53	ENSP00000398846:p.,ENSP00000269305:p.,ENSP00000391127:p.,ENSP00000410739:p.							Cell cycle inhibitors, p53 gene therapy, immunotherapies, Wee1 inhibitors, Chk1 inhibitors			Inactivating mutations of TP53 predict poorer prognosis and increased recurrence in some cancers such as breast and bladder cancer.	Biallelic Inactivation	1	1	KEEP		Somatic	4.4022e-25	4.4022e-25	COSM127200,COSM127201,COSM127202,COSM127203,COSM1649388,COSM4139869,COSM43753	107	13	breast,central_nervous_system,endometrium,genital_tract,haematopoietic_and_lymphoid_tissue,large_intestine,lung,oesophagus,ovary,pancreas,skin,upper_aerodigestive_tract,urinary_tract	57905	9443	41	NS,adrenal_gland,autonomic_ganglia,biliary_tract,bone,breast,central_nervous_system,cervix,endometrium,eye,fallopian_tube,gastrointestinal_tract_(site_indeterminate),genital_tract,haematopoietic_and_lymphoid_tissue,kidney,large_intestine,liver,lung,meninges,oesophagus,ovary,pancreas,paratesticular_tissues,penis,peritoneum,pituitary,placenta,pleura,prostate,salivary_gland,skin,small_intestine,soft…		LFS1,TP53,p53	0	HIGH	splice_acceptor_variant	0
chr17	7579538	A	AT	MAH_BTN-075	TP53	ENSP00000410739:p.-49-50X,ENSP00000391127:p.-49-50X,ENSP00000269305:p.-49-50X,ENSP00000398846:p.-49-50X							Cell cycle inhibitors, p53 gene therapy, immunotherapies, Wee1 inhibitors, Chk1 inhibitors			Inactivating mutations of TP53 predict poorer prognosis and increased recurrence in some cancers such as breast and bladder cancer.	Biallelic Inactivation	0	1			Somatic	1.9819e-11	1.9819e-11		null	null		57905	9443	41	NS,adrenal_gland,autonomic_ganglia,biliary_tract,bone,breast,central_nervous_system,cervix,endometrium,eye,fallopian_tube,gastrointestinal_tract_(site_indeterminate),genital_tract,haematopoietic_and_lymphoid_tissue,kidney,large_intestine,liver,lung,meninges,oesophagus,ovary,pancreas,paratesticular_tissues,penis,peritoneum,pituitary,placenta,pleura,prostate,salivary_gland,skin,small_intestine,soft…		LFS1,TP53,p53	0	HIGH	frameshift_variant	0
chr17	7577022	G	A	MAH_BTN-076	TP53	ENSP00000398846:p.R306*,ENSP00000269305:p.R306*,ENSP00000391127:p.R306*,ENSP00000410739:p.							Cell cycle inhibitors, p53 gene therapy, immunotherapies, Wee1 inhibitors, Chk1 inhibitors			Inactivating mutations of TP53 predict poorer prognosis and increased recurrence in some cancers such as breast and bladder cancer.	Biallelic Inactivation	1	1	KEEP		Somatic	7.195e-14	7.195e-14	COSM10663,COSM1640820,COSM3388168,COSM99947	412	20	NS,adrenal_gland,biliary_tract,bone,breast,central_nervous_system,endometrium,haematopoietic_and_lymphoid_tissue,kidney,large_intestine,liver,lung,oesophagus,ovary,pancreas,small_intestine,stomach,upper_aerodigestive_tract,urinary_tract,vulva	57905	9443	41	NS,adrenal_gland,autonomic_ganglia,biliary_tract,bone,breast,central_nervous_system,cervix,endometrium,eye,fallopian_tube,gastrointestinal_tract_(site_indeterminate),genital_tract,haematopoietic_and_lymphoid_tissue,kidney,large_intestine,liver,lung,meninges,oesophagus,ovary,pancreas,paratesticular_tissues,penis,peritoneum,pituitary,placenta,pleura,prostate,salivary_gland,skin,small_intestine,soft…		LFS1,TP53,p53	0	HIGH	stop_gained	0
chr17	7577079	CT	C	MAH_BTN-077	TP53	ENSP00000398846:p.E286X,ENSP00000269305:p.E286X,ENSP00000410739:p.,ENSP00000391127:p.E286X							Cell cycle inhibitors, p53 gene therapy, immunotherapies, Wee1 inhibitors, Chk1 inhibitors			Inactivating mutations of TP53 predict poorer prognosis and increased recurrence in some cancers such as breast and bladder cancer.	Biallelic Inactivation	0	1			Somatic	2.3293e-08	2.3293e-08		null	null		57905	9443	41	NS,adrenal_gland,autonomic_ganglia,biliary_tract,bone,breast,central_nervous_system,cervix,endometrium,eye,fallopian_tube,gastrointestinal_tract_(site_indeterminate),genital_tract,haematopoietic_and_lymphoid_tissue,kidney,large_intestine,liver,lung,meninges,oesophagus,ovary,pancreas,paratesticular_tissues,penis,peritoneum,pituitary,placenta,pleura,prostate,salivary_gland,skin,small_intestine,soft…		LFS1,TP53,p53	0	HIGH	frameshift_variant	0
chr17	7577564	GT	G	MAH_BTN-078	TP53	ENSP00000410739:p.N239X,ENSP00000391127:p.N239X,ENSP00000398846:p.N239X,ENSP00000269305:p.N239X							Cell cycle inhibitors, p53 gene therapy, immunotherapies, Wee1 inhibitors, Chk1 inhibitors			Inactivating mutations of TP53 predict poorer prognosis and increased recurrence in some cancers such as breast and bladder cancer.	Biallelic Inactivation	0	1			Somatic	2.3338e-15	2.3338e-15	COSM44183	2	2	central_nervous_system,oesophagus	57905	9443	41	NS,adrenal_gland,autonomic_ganglia,biliary_tract,bone,breast,central_nervous_system,cervix,endometrium,eye,fallopian_tube,gastrointestinal_tract_(site_indeterminate),genital_tract,haematopoietic_and_lymphoid_tissue,kidney,large_intestine,liver,lung,meninges,oesophagus,ovary,pancreas,paratesticular_tissues,penis,peritoneum,pituitary,placenta,pleura,prostate,salivary_gland,skin,small_intestine,soft…		LFS1,TP53,p53	0	HIGH	frameshift_variant	0
chr17	7577120	C	T	MAH_BTN-080	TP53	ENSP00000398846:p.R273H,ENSP00000269305:p.R273H,ENSP00000391127:p.R273H,ENSP00000410739:p.							Cell cycle inhibitors, p53 gene therapy, immunotherapies, Wee1 inhibitors, Chk1 inhibitors			Inactivating mutations of TP53 predict poorer prognosis and increased recurrence in some cancers such as breast and bladder cancer.	Biallelic Inactivation	1	1	KEEP		Somatic	2.7295e-10	2.7295e-10	COSM10660,COSM1645335,COSM3356963,COSM99729,COSM10660,COSM1645335,COSM3356963,COSM99729	2934	27	NS,biliary_tract,bone,breast,centr...,central_nervous_system,cervix,endometrium,fallopian_tube,genital_tract,haematopoietic_and_lymphoid_tissue,large_intestine,liver,lung,oesophagus,ovary,pancreas,penis,prostate,salivary_gland,skin,soft_tissue,stomach,thymus,upper_aerodigestive_tract,urinary_tract,vulva	57905	9443	41	NS,adrenal_gland,autonomic_ganglia,biliary_tract,bone,breast,central_nervous_system,cervix,endometrium,eye,fallopian_tube,gastrointestinal_tract_(site_indeterminate),genital_tract,haematopoietic_and_lymphoid_tissue,kidney,large_intestine,liver,lung,meninges,oesophagus,ovary,pancreas,paratesticular_tissues,penis,peritoneum,pituitary,placenta,pleura,prostate,salivary_gland,skin,small_intestine,soft…	p53, DNA-binding domain (1);p53-like transcription factor, DNA-binding (1);p53/RUNT-type transcription factor, DNA-binding domain (1);	LFS1,TP53,p53	0.001	MODERATE	missense_variant	1
chr17	7578406	C	T	MAH_BTN-081	TP53	ENSP00000391127:p.R175H,ENSP00000398846:p.R175H,ENSP00000269305:p.R175H,ENSP00000410739:p.R175H							Cell cycle inhibitors, p53 gene therapy, immunotherapies, Wee1 inhibitors, Chk1 inhibitors			Inactivating mutations of TP53 predict poorer prognosis and increased recurrence in some cancers such as breast and bladder cancer.	Biallelic Inactivation	1	1	KEEP		Somatic	9.8512e-06	9.8512e-06	COSM10648,COSM1640851,COSM3355994,COSM99022,COSM99023,COSM99024,COSM99914,COSM10648,COSM1640851,COSM3355994,COSM99022,COSM99023,COSM99024,COSM99914,COSM10648,COSM1640851,COSM3355994,COSM99022,COSM99023,COSM99024,COSM99914,COSM10648,COSM1640851,COSM3355994,COSM99022,COSM99023,COSM99024,COSM99914,COSM10648,COSM1640851,COSM3355994,COSM99022,COSM99023,COSM99024,COSM99914,COSM10648,COSM1640851,COSM335…	17958	29	...,NS,adrenal_gland,biliary_tract,bone,breast,central_nervous_system,cervix,endometrium,haematopoietic_and_lymphoid_tissue,kidney,large_intestine,liver,lung,oesophagus,ovary,pancreas,penis,peritoneum,prostate,salivary_gland,skin,small_intestine,soft_tissue,stomach,thyroid,upper_aerodigestive_tract,urinary_tract,vulva	57905	9443	41	NS,adrenal_gland,autonomic_ganglia,biliary_tract,bone,breast,central_nervous_system,cervix,endometrium,eye,fallopian_tube,gastrointestinal_tract_(site_indeterminate),genital_tract,haematopoietic_and_lymphoid_tissue,kidney,large_intestine,liver,lung,meninges,oesophagus,ovary,pancreas,paratesticular_tissues,penis,peritoneum,pituitary,placenta,pleura,prostate,salivary_gland,skin,small_intestine,soft…	p53, DNA-binding domain (1);p53-like transcription factor, DNA-binding (1);p53/RUNT-type transcription factor, DNA-binding domain (1);	LFS1,TP53,p53	1.49934e-05	MODERATE	missense_variant	1
chr17	7578265	A	G	MAH_BTN-088	TP53	ENSP00000391127:p.I195T,ENSP00000398846:p.I195T,ENSP00000269305:p.I195T,ENSP00000410739:p.I195T							Cell cycle inhibitors, p53 gene therapy, immunotherapies, Wee1 inhibitors, Chk1 inhibitors			Inactivating mutations of TP53 predict poorer prognosis and increased recurrence in some cancers such as breast and bladder cancer.	Biallelic Inactivation	1	1	KEEP		Somatic	9.33e-16	9.33e-16	COSM11089,COSM116921,COSM116922,COSM116923,COSM116924,COSM1645297,COSM3421936	345	17	biliary_tract,breast,central_nervous_s...,central_nervous_system,endometrium,haematopoietic_and_lymphoid_tissue,large_intestine,liver,lung,oesophagus,ovary,pancreas,prostate,small_intestine,stomach,upper_aerodigestive_tract,urinary_tract	57905	9443	41	NS,adrenal_gland,autonomic_ganglia,biliary_tract,bone,breast,central_nervous_system,cervix,endometrium,eye,fallopian_tube,gastrointestinal_tract_(site_indeterminate),genital_tract,haematopoietic_and_lymphoid_tissue,kidney,large_intestine,liver,lung,meninges,oesophagus,ovary,pancreas,paratesticular_tissues,penis,peritoneum,pituitary,placenta,pleura,prostate,salivary_gland,skin,small_intestine,soft…	p53, DNA-binding domain (1);p53-like transcription factor, DNA-binding (1);p53/RUNT-type transcription factor, DNA-binding domain (1);	LFS1,TP53,p53	0	MODERATE	missense_variant	1
chr17	7579536	C	A	MAH_BTN-091	TP53	ENSP00000410739:p.E51*,ENSP00000269305:p.E51*,ENSP00000398846:p.E51*,ENSP00000391127:p.E51*							Cell cycle inhibitors, p53 gene therapy, immunotherapies, Wee1 inhibitors, Chk1 inhibitors			Inactivating mutations of TP53 predict poorer prognosis and increased recurrence in some cancers such as breast and bladder cancer.	Biallelic Inactivation	1	1	KEEP		Somatic	8.7276e-05	8.7276e-05	COSM1564161,COSM1564162,COSM1731913,COSM3820733,COSM44907	31	7	breast,endometrium,haematopoietic_and_lymphoid_tissue,large_intestine,ovary,skin,upper_aerodigestive_tract	57905	9443	41	NS,adrenal_gland,autonomic_ganglia,biliary_tract,bone,breast,central_nervous_system,cervix,endometrium,eye,fallopian_tube,gastrointestinal_tract_(site_indeterminate),genital_tract,haematopoietic_and_lymphoid_tissue,kidney,large_intestine,liver,lung,meninges,oesophagus,ovary,pancreas,paratesticular_tissues,penis,peritoneum,pituitary,placenta,pleura,prostate,salivary_gland,skin,small_intestine,soft…		LFS1,TP53,p53	0	HIGH	stop_gained	0
chr17	7574002	CG	C	MAH_R17017905LU01	TP53	ENSP00000391127:p.,ENSP00000398846:p.,ENSP00000269305:p.R342X,ENSP00000410739:p.							Cell cycle inhibitors, p53 gene therapy, immunotherapies, Wee1 inhibitors, Chk1 inhibitors			Inactivating mutations of TP53 predict poorer prognosis and increased recurrence in some cancers such as breast and bladder cancer.	Biallelic Inactivation	0	1			Somatic	1.9178999721702894E-8	1.9178999721702894E-8	COSM128665,COSM18597,COSM241992,COSM43795	25	9	adrenal_gland,breast,central_nervous_system,haematopoietic_and_lymphoid_tissue,liver,ovary,pleura,prostate,upper_aerodigestive_tract	59531	9524	41	NS,adrenal_gland,autonomic_ganglia,biliary_tract,bone,breast,central_nervous_system,cervix,endometrium,eye,fallopian_tube,gastrointestinal_tract_(site_indeterminate),genital_tract,haematopoietic_and_lymphoid_tissue,kidney,large_intestine,liver,lung,meninges,oesophagus,ovary,pancreas,paratesticular_tissues,penis,peritoneum,pituitary,placenta,pleura,prostate,salivary_gland,skin,small_intestine,soft…		TP53,p53,LFS1	0.0	HIGH	frameshift_variant	0.0
chr17	7576630	A	C	MAH_R17017890LU01	TP53	ENSP00000269305:p.,ENSP00000391127:p.C341G,ENSP00000410739:p.,ENSP00000398846:p.							Cell cycle inhibitors, p53 gene therapy, immunotherapies, Wee1 inhibitors, Chk1 inhibitors			Inactivating mutations of TP53 predict poorer prognosis and increased recurrence in some cancers such as breast and bladder cancer.	Biallelic Inactivation	1	1	KEEP		Somatic	5.0778999061140695E-11	5.0778999061140695E-11		null	null		59531	9524	41	NS,adrenal_gland,autonomic_ganglia,biliary_tract,bone,breast,central_nervous_system,cervix,endometrium,eye,fallopian_tube,gastrointestinal_tract_(site_indeterminate),genital_tract,haematopoietic_and_lymphoid_tissue,kidney,large_intestine,liver,lung,meninges,oesophagus,ovary,pancreas,paratesticular_tissues,penis,peritoneum,pituitary,placenta,pleura,prostate,salivary_gland,skin,small_intestine,soft…		TP53,p53,LFS1	0.0023394799791276455	MODERATE	missense_variant	1.0
chr17	7577053	AGGCTCCCC	A	MAH_R17017913LU01	TP53	ENSP00000410739:p.,ENSP00000398846:p.GEP293-295X,ENSP00000391127:p.GEP293-295X,ENSP00000269305:p.GEP293-295X							Cell cycle inhibitors, p53 gene therapy, immunotherapies, Wee1 inhibitors, Chk1 inhibitors			Inactivating mutations of TP53 predict poorer prognosis and increased recurrence in some cancers such as breast and bladder cancer.	Biallelic Inactivation	0	1			Somatic	1.4500999441224849E-6	1.4500999441224849E-6		null	null		59531	9524	41	NS,adrenal_gland,autonomic_ganglia,biliary_tract,bone,breast,central_nervous_system,cervix,endometrium,eye,fallopian_tube,gastrointestinal_tract_(site_indeterminate),genital_tract,haematopoietic_and_lymphoid_tissue,kidney,large_intestine,liver,lung,meninges,oesophagus,ovary,pancreas,paratesticular_tissues,penis,peritoneum,pituitary,placenta,pleura,prostate,salivary_gland,skin,small_intestine,soft…		TP53,p53,LFS1	0.0	HIGH	frameshift_variant	0.0
chr17	7577094	G	A	MAH_R17017903LU01	TP53	ENSP00000391127:p.R282W,ENSP00000398846:p.R282W,ENSP00000269305:p.R282W,ENSP00000410739:p.							Cell cycle inhibitors, p53 gene therapy, immunotherapies, Wee1 inhibitors, Chk1 inhibitors			Inactivating mutations of TP53 predict poorer prognosis and increased recurrence in some cancers such as breast and bladder cancer.	Biallelic Inactivation	1	1	KEEP		Somatic	5.542799906561706E-16	5.542799906561706E-16	COSM10704,COSM1636702,COSM3378339,COSM99925,COSM10704,COSM1636702,COSM3378339,COSM99925	2058	25	NS,biliary_tract,bone,breast,central_nervo...,central_nervous_system,endometrium,haematopoietic_and_lymphoid_tissue,large_intestine,liver,lung,oesophagus,ovary,pancreas,peritoneum,prostate,salivary_gland,skin,small_intestine,stomach,thymus,thyroid,upper_aerodigestive_tract,urinary_tract,vulva	59531	9524	41	NS,adrenal_gland,autonomic_ganglia,biliary_tract,bone,breast,central_nervous_system,cervix,endometrium,eye,fallopian_tube,gastrointestinal_tract_(site_indeterminate),genital_tract,haematopoietic_and_lymphoid_tissue,kidney,large_intestine,liver,lung,meninges,oesophagus,ovary,pancreas,paratesticular_tissues,penis,peritoneum,pituitary,placenta,pleura,prostate,salivary_gland,skin,small_intestine,soft…	p53, DNA-binding domain (1);p53-like transcription factor, DNA-binding (1);p53/RUNT-type transcription factor, DNA-binding domain (1);	TP53,p53,LFS1	1.9999999494757503E-4	MODERATE	missense_variant	1.0
chr17	7577094	G	A	MAH_R17017905LU01	TP53	ENSP00000391127:p.R282W,ENSP00000398846:p.R282W,ENSP00000269305:p.R282W,ENSP00000410739:p.							Cell cycle inhibitors, p53 gene therapy, immunotherapies, Wee1 inhibitors, Chk1 inhibitors			Inactivating mutations of TP53 predict poorer prognosis and increased recurrence in some cancers such as breast and bladder cancer.	Biallelic Inactivation	0	1	KEEP			null	null	COSM10704,COSM1636702,COSM3378339,COSM99925,COSM10704,COSM1636702,COSM3378339,COSM99925	2058	25	NS,biliary_tract,bone,breast,central_nervo...,central_nervous_system,endometrium,haematopoietic_and_lymphoid_tissue,large_intestine,liver,lung,oesophagus,ovary,pancreas,peritoneum,prostate,salivary_gland,skin,small_intestine,stomach,thymus,thyroid,upper_aerodigestive_tract,urinary_tract,vulva	59531	9524	41	NS,adrenal_gland,autonomic_ganglia,biliary_tract,bone,breast,central_nervous_system,cervix,endometrium,eye,fallopian_tube,gastrointestinal_tract_(site_indeterminate),genital_tract,haematopoietic_and_lymphoid_tissue,kidney,large_intestine,liver,lung,meninges,oesophagus,ovary,pancreas,paratesticular_tissues,penis,peritoneum,pituitary,placenta,pleura,prostate,salivary_gland,skin,small_intestine,soft…	p53, DNA-binding domain (1);p53-like transcription factor, DNA-binding (1);p53/RUNT-type transcription factor, DNA-binding domain (1);	TP53,p53,LFS1	1.9999999494757503E-4	MODERATE	missense_variant	1.0
chr17	7577099	C	G	MAH_R17017916LU01	TP53	ENSP00000398846:p.R280T,ENSP00000269305:p.R280T,ENSP00000391127:p.R280T,ENSP00000410739:p.							Cell cycle inhibitors, p53 gene therapy, immunotherapies, Wee1 inhibitors, Chk1 inhibitors			Inactivating mutations of TP53 predict poorer prognosis and increased recurrence in some cancers such as breast and bladder cancer.	Biallelic Inactivation	1	1	KEEP		Somatic	5.190899901208468E-5	5.190899901208468E-5	COSM10724,COSM1649340,COSM254987,COSM3733332	113	16	biliary_tract,breast,central_nervous_system,endometrium,haematopoietic_and_lymphoid_tissue,large_intestine,lung,oesophagus,prostate,salivary_gland,skin,small_intestine,stomach,upper_aerodigestive_tract,urinary_tract,vagina	59531	9524	41	NS,adrenal_gland,autonomic_ganglia,biliary_tract,bone,breast,central_nervous_system,cervix,endometrium,eye,fallopian_tube,gastrointestinal_tract_(site_indeterminate),genital_tract,haematopoietic_and_lymphoid_tissue,kidney,large_intestine,liver,lung,meninges,oesophagus,ovary,pancreas,paratesticular_tissues,penis,peritoneum,pituitary,placenta,pleura,prostate,salivary_gland,skin,small_intestine,soft…	p53, DNA-binding domain (1);p53-like transcription factor, DNA-binding (1);p53/RUNT-type transcription factor, DNA-binding domain (1);	TP53,p53,LFS1	0.0	MODERATE	missense_variant	1.0
chr17	7577121	G	A	MAH_R17017906LU01	TP53	ENSP00000391127:p.R273C,ENSP00000398846:p.R273C,ENSP00000269305:p.R273C,ENSP00000410739:p.							Cell cycle inhibitors, p53 gene therapy, immunotherapies, Wee1 inhibitors, Chk1 inhibitors			Inactivating mutations of TP53 predict poorer prognosis and increased recurrence in some cancers such as breast and bladder cancer.	Biallelic Inactivation	1	1	KEEP		Somatic	5.7693998911645394E-8	5.7693998911645394E-8	COSM10659,COSM1645518,COSM3355991,COSM99933,COSM10659,COSM1645518,COSM3355991,COSM99933	2672	30	adrenal_gland,biliary_tract,bone,breast,central_nervous_system,cervix,endometrium,eye,genital_tract,haematopoietic_and_lymphoid_tissue,kidney,large_intestine,liver,lung,oesophagus,ovary,pancreas,penis,peritoneum,pleura,prostate,salivary_gland,skin,small_intes...,small_intestine,stomach,thyroid,upper_aerodigestive_tract,urinary_tract,vulva	59531	9524	41	NS,adrenal_gland,autonomic_ganglia,biliary_tract,bone,breast,central_nervous_system,cervix,endometrium,eye,fallopian_tube,gastrointestinal_tract_(site_indeterminate),genital_tract,haematopoietic_and_lymphoid_tissue,kidney,large_intestine,liver,lung,meninges,oesophagus,ovary,pancreas,paratesticular_tissues,penis,peritoneum,pituitary,placenta,pleura,prostate,salivary_gland,skin,small_intestine,soft…	p53, DNA-binding domain (1);p53-like transcription factor, DNA-binding (1);p53/RUNT-type transcription factor, DNA-binding domain (1);	TP53,p53,LFS1	5.805179898743518E-5	MODERATE	missense_variant	1.0
chr17	7577121	G	A	MAH_R17017899LU01	TP53	ENSP00000391127:p.R273C,ENSP00000398846:p.R273C,ENSP00000269305:p.R273C,ENSP00000410739:p.							Cell cycle inhibitors, p53 gene therapy, immunotherapies, Wee1 inhibitors, Chk1 inhibitors			Inactivating mutations of TP53 predict poorer prognosis and increased recurrence in some cancers such as breast and bladder cancer.	Biallelic Inactivation	1	1	KEEP		Somatic	3.2298000860464526E-6	3.2298000860464526E-6	COSM10659,COSM1645518,COSM3355991,COSM99933,COSM10659,COSM1645518,COSM3355991,COSM99933	2672	30	adrenal_gland,biliary_tract,bone,breast,central_nervous_system,cervix,endometrium,eye,genital_tract,haematopoietic_and_lymphoid_tissue,kidney,large_intestine,liver,lung,oesophagus,ovary,pancreas,penis,peritoneum,pleura,prostate,salivary_gland,skin,small_intes...,small_intestine,stomach,thyroid,upper_aerodigestive_tract,urinary_tract,vulva	59531	9524	41	NS,adrenal_gland,autonomic_ganglia,biliary_tract,bone,breast,central_nervous_system,cervix,endometrium,eye,fallopian_tube,gastrointestinal_tract_(site_indeterminate),genital_tract,haematopoietic_and_lymphoid_tissue,kidney,large_intestine,liver,lung,meninges,oesophagus,ovary,pancreas,paratesticular_tissues,penis,peritoneum,pituitary,placenta,pleura,prostate,salivary_gland,skin,small_intestine,soft…	p53, DNA-binding domain (1);p53-like transcription factor, DNA-binding (1);p53/RUNT-type transcription factor, DNA-binding domain (1);	TP53,p53,LFS1	5.805179898743518E-5	MODERATE	missense_variant	1.0
chr17	7577123	A	C	MAH_R17017920LU01	TP53	ENSP00000398846:p.V272G,ENSP00000269305:p.V272G,ENSP00000391127:p.V272G,ENSP00000410739:p.							Cell cycle inhibitors, p53 gene therapy, immunotherapies, Wee1 inhibitors, Chk1 inhibitors			Inactivating mutations of TP53 predict poorer prognosis and increased recurrence in some cancers such as breast and bladder cancer.	Biallelic Inactivation	1	1	KEEP		Somatic	3.985099901910871E-4	3.985099901910871E-4	COSM3773298,COSM3773299,COSM44870,COSM562337	14	6	NS,endometrium,lung,ovary,pancreas,skin	59531	9524	41	NS,adrenal_gland,autonomic_ganglia,biliary_tract,bone,breast,central_nervous_system,cervix,endometrium,eye,fallopian_tube,gastrointestinal_tract_(site_indeterminate),genital_tract,haematopoietic_and_lymphoid_tissue,kidney,large_intestine,liver,lung,meninges,oesophagus,ovary,pancreas,paratesticular_tissues,penis,peritoneum,pituitary,placenta,pleura,prostate,salivary_gland,skin,small_intestine,soft…	p53, DNA-binding domain (1);p53-like transcription factor, DNA-binding (1);p53/RUNT-type transcription factor, DNA-binding domain (1);	TP53,p53,LFS1	0.0	MODERATE	missense_variant	1.0
chr17	7577534	C	A	MAH_R17017904LU01	TP53	ENSP00000410739:p.R249S,ENSP00000391127:p.R249S,ENSP00000398846:p.R249S,ENSP00000269305:p.R249S							Cell cycle inhibitors, p53 gene therapy, immunotherapies, Wee1 inhibitors, Chk1 inhibitors			Inactivating mutations of TP53 predict poorer prognosis and increased recurrence in some cancers such as breast and bladder cancer.	Biallelic Inactivation	1	1	KEEP		Somatic	1.919700075986297E-12	1.919700075986297E-12	COSM10817,COSM131478,COSM131479,COSM1646861,COSM3717634	735	21	biliary_tract,breast,central_nervous_system,cervix,endometrium,haematopoietic_and_lymphoid_tissue,kidney,large_intestine,liver,lung,oesophagus,ovary,pancreas,pleura,prostate,salivary_gland,skin,stomach,upper_aerodigestive_tract,urinary_tract,vulva	59531	9524	41	NS,adrenal_gland,autonomic_ganglia,biliary_tract,bone,breast,central_nervous_system,cervix,endometrium,eye,fallopian_tube,gastrointestinal_tract_(site_indeterminate),genital_tract,haematopoietic_and_lymphoid_tissue,kidney,large_intestine,liver,lung,meninges,oesophagus,ovary,pancreas,paratesticular_tissues,penis,peritoneum,pituitary,placenta,pleura,prostate,salivary_gland,skin,small_intestine,soft…	p53, DNA-binding domain (1);p53-like transcription factor, DNA-binding (1);p53/RUNT-type transcription factor, DNA-binding domain (1);	TP53,p53,LFS1	0.0	MODERATE	missense_variant	1.0
chr17	7577538	C	T	MAH_R17017898LU01	TP53	ENSP00000410739:p.R248Q,ENSP00000391127:p.R248Q,ENSP00000398846:p.R248Q,ENSP00000269305:p.R248Q							Cell cycle inhibitors, p53 gene therapy, immunotherapies, Wee1 inhibitors, Chk1 inhibitors			Inactivating mutations of TP53 predict poorer prognosis and increased recurrence in some cancers such as breast and bladder cancer.	Biallelic Inactivation	1	1	KEEP		Somatic	0.005485500209033489	0.005485500209033489	COSM10662,COSM1640830,COSM3356964,COSM99020,COSM99021,COSM99602,COSM10662,COSM1640830,COSM3356964,COSM99020,COSM99021,COSM99602,COSM10662,COSM1640830,COSM3356964,COSM99020,COSM99021,COSM99602	5571	32	NS,adrenal_gland,biliary_tract,bone,breast,central_nervous_system,cervix,endometrium,eye,genital_tract,haematopoietic_and_lymphoid_tissue,kidney,large_intestine,liver,lung,oesophagus,ovary,pancreas,peritoneum,pituitary,pleura,prostate,s...,salivary_gland,skin,small_intestine,soft_tissue,stomach,thyroid,upper_aerodigestive_tract,urinary_tract,vulva	59531	9524	41	NS,adrenal_gland,autonomic_ganglia,biliary_tract,bone,breast,central_nervous_system,cervix,endometrium,eye,fallopian_tube,gastrointestinal_tract_(site_indeterminate),genital_tract,haematopoietic_and_lymphoid_tissue,kidney,large_intestine,liver,lung,meninges,oesophagus,ovary,pancreas,paratesticular_tissues,penis,peritoneum,pituitary,placenta,pleura,prostate,salivary_gland,skin,small_intestine,soft…	p53, DNA-binding domain (1);p53-like transcription factor, DNA-binding (1);p53/RUNT-type transcription factor, DNA-binding domain (1);	TP53,p53,LFS1	9.999999747378752E-5	MODERATE	missense_variant	1.0
chr17	7577538	C	T	MAH_R17017912LU01	TP53	ENSP00000410739:p.R248Q,ENSP00000391127:p.R248Q,ENSP00000398846:p.R248Q,ENSP00000269305:p.R248Q							Cell cycle inhibitors, p53 gene therapy, immunotherapies, Wee1 inhibitors, Chk1 inhibitors			Inactivating mutations of TP53 predict poorer prognosis and increased recurrence in some cancers such as breast and bladder cancer.	Biallelic Inactivation	1	1	KEEP		Somatic	1.651400023672256E-11	1.651400023672256E-11	COSM10662,COSM1640830,COSM3356964,COSM99020,COSM99021,COSM99602,COSM10662,COSM1640830,COSM3356964,COSM99020,COSM99021,COSM99602,COSM10662,COSM1640830,COSM3356964,COSM99020,COSM99021,COSM99602	5571	32	NS,adrenal_gland,biliary_tract,bone,breast,central_nervous_system,cervix,endometrium,eye,genital_tract,haematopoietic_and_lymphoid_tissue,kidney,large_intestine,liver,lung,oesophagus,ovary,pancreas,peritoneum,pituitary,pleura,prostate,s...,salivary_gland,skin,small_intestine,soft_tissue,stomach,thyroid,upper_aerodigestive_tract,urinary_tract,vulva	59531	9524	41	NS,adrenal_gland,autonomic_ganglia,biliary_tract,bone,breast,central_nervous_system,cervix,endometrium,eye,fallopian_tube,gastrointestinal_tract_(site_indeterminate),genital_tract,haematopoietic_and_lymphoid_tissue,kidney,large_intestine,liver,lung,meninges,oesophagus,ovary,pancreas,paratesticular_tissues,penis,peritoneum,pituitary,placenta,pleura,prostate,salivary_gland,skin,small_intestine,soft…	p53, DNA-binding domain (1);p53-like transcription factor, DNA-binding (1);p53/RUNT-type transcription factor, DNA-binding domain (1);	TP53,p53,LFS1	9.999999747378752E-5	MODERATE	missense_variant	1.0
chr17	7577538	C	T	MAH_R17017900LU01	TP53	ENSP00000410739:p.R248Q,ENSP00000391127:p.R248Q,ENSP00000398846:p.R248Q,ENSP00000269305:p.R248Q							Cell cycle inhibitors, p53 gene therapy, immunotherapies, Wee1 inhibitors, Chk1 inhibitors			Inactivating mutations of TP53 predict poorer prognosis and increased recurrence in some cancers such as breast and bladder cancer.	Biallelic Inactivation	1	1	KEEP		Somatic	6.179999909363687E-4	6.179999909363687E-4	COSM10662,COSM1640830,COSM3356964,COSM99020,COSM99021,COSM99602,COSM10662,COSM1640830,COSM3356964,COSM99020,COSM99021,COSM99602,COSM10662,COSM1640830,COSM3356964,COSM99020,COSM99021,COSM99602	5571	32	NS,adrenal_gland,biliary_tract,bone,breast,central_nervous_system,cervix,endometrium,eye,genital_tract,haematopoietic_and_lymphoid_tissue,kidney,large_intestine,liver,lung,oesophagus,ovary,pancreas,peritoneum,pituitary,pleura,prostate,s...,salivary_gland,skin,small_intestine,soft_tissue,stomach,thyroid,upper_aerodigestive_tract,urinary_tract,vulva	59531	9524	41	NS,adrenal_gland,autonomic_ganglia,biliary_tract,bone,breast,central_nervous_system,cervix,endometrium,eye,fallopian_tube,gastrointestinal_tract_(site_indeterminate),genital_tract,haematopoietic_and_lymphoid_tissue,kidney,large_intestine,liver,lung,meninges,oesophagus,ovary,pancreas,paratesticular_tissues,penis,peritoneum,pituitary,placenta,pleura,prostate,salivary_gland,skin,small_intestine,soft…	p53, DNA-binding domain (1);p53-like transcription factor, DNA-binding (1);p53/RUNT-type transcription factor, DNA-binding domain (1);	TP53,p53,LFS1	9.999999747378752E-5	MODERATE	missense_variant	1.0
chr17	7577539	G	A	MAH_R17017895LU01	TP53	ENSP00000398846:p.R248W,ENSP00000269305:p.R248W,ENSP00000410739:p.R248W,ENSP00000391127:p.R248W							Cell cycle inhibitors, p53 gene therapy, immunotherapies, Wee1 inhibitors, Chk1 inhibitors			Inactivating mutations of TP53 predict poorer prognosis and increased recurrence in some cancers such as breast and bladder cancer.	Biallelic Inactivation	1	1	KEEP		Somatic	0.0029037001077085733	0.0029037001077085733	COSM10656,COSM120005,COSM120006,COSM120007,COSM1640831,COSM3388183	1492	27	NS,biliary_tract,bone,breast,central_nervous_system,cervix,e...,endometrium,haematopoietic_and_lymphoid_tissue,kidney,large_intestine,liver,lung,oesophagus,ovary,pancreas,penis,pleura,prostate,skin,soft_tissue,stomach,thymus,thyroid,upper_aerodigestive_tract,urinary_tract,vulva	59531	9524	41	NS,adrenal_gland,autonomic_ganglia,biliary_tract,bone,breast,central_nervous_system,cervix,endometrium,eye,fallopian_tube,gastrointestinal_tract_(site_indeterminate),genital_tract,haematopoietic_and_lymphoid_tissue,kidney,large_intestine,liver,lung,meninges,oesophagus,ovary,pancreas,paratesticular_tissues,penis,peritoneum,pituitary,placenta,pleura,prostate,salivary_gland,skin,small_intestine,soft…	p53, DNA-binding domain (1);p53-like transcription factor, DNA-binding (1);p53/RUNT-type transcription factor, DNA-binding domain (1);	TP53,p53,LFS1	8.952230928116478E-6	MODERATE	missense_variant	1.0
chr17	7577557	A	C	MAH_R17017908LU01	TP53	ENSP00000398846:p.C242G,ENSP00000269305:p.C242G,ENSP00000391127:p.C242G,ENSP00000410739:p.C242G							Cell cycle inhibitors, p53 gene therapy, immunotherapies, Wee1 inhibitors, Chk1 inhibitors			Inactivating mutations of TP53 predict poorer prognosis and increased recurrence in some cancers such as breast and bladder cancer.	Biallelic Inactivation	1	1	KEEP		Somatic	1.1750999692594633E-4	1.1750999692594633E-4	COSM3717643,COSM3717644,COSM3717645,COSM3717646,COSM3717647,COSM44135,COSM3717643,COSM3717644,COSM3717645,COSM3717646,COSM3717647,COSM44135	90	7	biliary_tract,breast,liver,lung,pancreas,prostate,skin	59531	9524	41	NS,adrenal_gland,autonomic_ganglia,biliary_tract,bone,breast,central_nervous_system,cervix,endometrium,eye,fallopian_tube,gastrointestinal_tract_(site_indeterminate),genital_tract,haematopoietic_and_lymphoid_tissue,kidney,large_intestine,liver,lung,meninges,oesophagus,ovary,pancreas,paratesticular_tissues,penis,peritoneum,pituitary,placenta,pleura,prostate,salivary_gland,skin,small_intestine,soft…	p53, DNA-binding domain (1);p53-like transcription factor, DNA-binding (1);p53/RUNT-type transcription factor, DNA-binding domain (1);	TP53,p53,LFS1	0.0	MODERATE	missense_variant	1.0
chr17	7577557	A	C	MAH_R17017907LU01	TP53	ENSP00000398846:p.C242G,ENSP00000269305:p.C242G,ENSP00000391127:p.C242G,ENSP00000410739:p.C242G							Cell cycle inhibitors, p53 gene therapy, immunotherapies, Wee1 inhibitors, Chk1 inhibitors			Inactivating mutations of TP53 predict poorer prognosis and increased recurrence in some cancers such as breast and bladder cancer.	Biallelic Inactivation	1	1	KEEP		Somatic	6.586799790493647E-13	6.586799790493647E-13	COSM3717643,COSM3717644,COSM3717645,COSM3717646,COSM3717647,COSM44135,COSM3717643,COSM3717644,COSM3717645,COSM3717646,COSM3717647,COSM44135	90	7	biliary_tract,breast,liver,lung,pancreas,prostate,skin	59531	9524	41	NS,adrenal_gland,autonomic_ganglia,biliary_tract,bone,breast,central_nervous_system,cervix,endometrium,eye,fallopian_tube,gastrointestinal_tract_(site_indeterminate),genital_tract,haematopoietic_and_lymphoid_tissue,kidney,large_intestine,liver,lung,meninges,oesophagus,ovary,pancreas,paratesticular_tissues,penis,peritoneum,pituitary,placenta,pleura,prostate,salivary_gland,skin,small_intestine,soft…	p53, DNA-binding domain (1);p53-like transcription factor, DNA-binding (1);p53/RUNT-type transcription factor, DNA-binding domain (1);	TP53,p53,LFS1	0.0	MODERATE	missense_variant	1.0
chr17	7577559	GA	G	MAH_R17017918LU01	TP53	ENSP00000410739:p.S240X,ENSP00000391127:p.S240X,ENSP00000398846:p.S240X,ENSP00000269305:p.S240X							Cell cycle inhibitors, p53 gene therapy, immunotherapies, Wee1 inhibitors, Chk1 inhibitors			Inactivating mutations of TP53 predict poorer prognosis and increased recurrence in some cancers such as breast and bladder cancer.	Biallelic Inactivation	0	1			Somatic	5.191399736759195E-7	5.191399736759195E-7	COSM43645	9	7	breast,haematopoietic_and_lymphoid_tissue,large_intestine,lung,pancreas,stomach,urinary_tract	59531	9524	41	NS,adrenal_gland,autonomic_ganglia,biliary_tract,bone,breast,central_nervous_system,cervix,endometrium,eye,fallopian_tube,gastrointestinal_tract_(site_indeterminate),genital_tract,haematopoietic_and_lymphoid_tissue,kidney,large_intestine,liver,lung,meninges,oesophagus,ovary,pancreas,paratesticular_tissues,penis,peritoneum,pituitary,placenta,pleura,prostate,salivary_gland,skin,small_intestine,soft…		TP53,p53,LFS1	0.0	HIGH	frameshift_variant	0.0
chr17	7578165	TGCAAACCAGACCTCAGGCG	T	MAH_R17017910LU01	TP53	ENSP00000410739:p.221-?,ENSP00000391127:p.221-?,ENSP00000398846:p.221-?,ENSP00000269305:p.221-?							Cell cycle inhibitors, p53 gene therapy, immunotherapies, Wee1 inhibitors, Chk1 inhibitors			Inactivating mutations of TP53 predict poorer prognosis and increased recurrence in some cancers such as breast and bladder cancer.	Biallelic Inactivation	0	1			Somatic	5.240499740466475E-4	5.240499740466475E-4		null	null		59531	9524	41	NS,adrenal_gland,autonomic_ganglia,biliary_tract,bone,breast,central_nervous_system,cervix,endometrium,eye,fallopian_tube,gastrointestinal_tract_(site_indeterminate),genital_tract,haematopoietic_and_lymphoid_tissue,kidney,large_intestine,liver,lung,meninges,oesophagus,ovary,pancreas,paratesticular_tissues,penis,peritoneum,pituitary,placenta,pleura,prostate,salivary_gland,skin,small_intestine,soft…		TP53,p53,LFS1	0.0	HIGH	splice_donor_variant	0.0
chr17	7578190	T	C	MAH_R17017896LU01	TP53	ENSP00000410739:p.Y220C,ENSP00000398846:p.Y220C,ENSP00000269305:p.Y220C,ENSP00000391127:p.Y220C							Cell cycle inhibitors, p53 gene therapy, immunotherapies, Wee1 inhibitors, Chk1 inhibitors			Inactivating mutations of TP53 predict poorer prognosis and increased recurrence in some cancers such as breast and bladder cancer.	Biallelic Inactivation	1	1	KEEP		Somatic	6.694299941045756E-7	6.694299941045756E-7	COSM10758,COSM1644277,COSM3355993,COSM99718,COSM99719,COSM99720,COSM10758,COSM1644277,COSM3355993,COSM99718,COSM99719,COSM99720,COSM10758,COSM1644277,COSM3355993,COSM99718,COSM99719,COSM99720	2820	22	biliary_tract,bone,breast,central_nervous_system,endometrium,haematopoietic_and_lymphoid_tissue,large_intestine,live...,liver,lung,oesophagus,ovary,pancreas,peritoneum,prostate,salivary_gland,skin,small_intestine,soft_tissue,stomach,upper_aerodigestive_tract,urinary_tract	59531	9524	41	NS,adrenal_gland,autonomic_ganglia,biliary_tract,bone,breast,central_nervous_system,cervix,endometrium,eye,fallopian_tube,gastrointestinal_tract_(site_indeterminate),genital_tract,haematopoietic_and_lymphoid_tissue,kidney,large_intestine,liver,lung,meninges,oesophagus,ovary,pancreas,paratesticular_tissues,penis,peritoneum,pituitary,placenta,pleura,prostate,salivary_gland,skin,small_intestine,soft…	p53, DNA-binding domain (1);p53-like transcription factor, DNA-binding (1);p53/RUNT-type transcription factor, DNA-binding domain (1);	TP53,p53,LFS1	1.7909600501297973E-5	MODERATE	missense_variant	1.0
chr17	7578190	T	C	MAH_R17017921LU01	TP53	ENSP00000410739:p.Y220C,ENSP00000398846:p.Y220C,ENSP00000269305:p.Y220C,ENSP00000391127:p.Y220C							Cell cycle inhibitors, p53 gene therapy, immunotherapies, Wee1 inhibitors, Chk1 inhibitors			Inactivating mutations of TP53 predict poorer prognosis and increased recurrence in some cancers such as breast and bladder cancer.	Biallelic Inactivation	1	1	KEEP		Somatic	2.5734000246302458E-6	2.5734000246302458E-6	COSM10758,COSM1644277,COSM3355993,COSM99718,COSM99719,COSM99720,COSM10758,COSM1644277,COSM3355993,COSM99718,COSM99719,COSM99720,COSM10758,COSM1644277,COSM3355993,COSM99718,COSM99719,COSM99720	2820	22	biliary_tract,bone,breast,central_nervous_system,endometrium,haematopoietic_and_lymphoid_tissue,large_intestine,live...,liver,lung,oesophagus,ovary,pancreas,peritoneum,prostate,salivary_gland,skin,small_intestine,soft_tissue,stomach,upper_aerodigestive_tract,urinary_tract	59531	9524	41	NS,adrenal_gland,autonomic_ganglia,biliary_tract,bone,breast,central_nervous_system,cervix,endometrium,eye,fallopian_tube,gastrointestinal_tract_(site_indeterminate),genital_tract,haematopoietic_and_lymphoid_tissue,kidney,large_intestine,liver,lung,meninges,oesophagus,ovary,pancreas,paratesticular_tissues,penis,peritoneum,pituitary,placenta,pleura,prostate,salivary_gland,skin,small_intestine,soft…	p53, DNA-binding domain (1);p53-like transcription factor, DNA-binding (1);p53/RUNT-type transcription factor, DNA-binding domain (1);	TP53,p53,LFS1	1.7909600501297973E-5	MODERATE	missense_variant	1.0
chr17	7578190	T	C	MAH_R17017893LU01	TP53	ENSP00000410739:p.Y220C,ENSP00000398846:p.Y220C,ENSP00000269305:p.Y220C,ENSP00000391127:p.Y220C							Cell cycle inhibitors, p53 gene therapy, immunotherapies, Wee1 inhibitors, Chk1 inhibitors			Inactivating mutations of TP53 predict poorer prognosis and increased recurrence in some cancers such as breast and bladder cancer.	Biallelic Inactivation	1	1	KEEP		Somatic	7.486299864467583E-7	7.486299864467583E-7	COSM10758,COSM1644277,COSM3355993,COSM99718,COSM99719,COSM99720,COSM10758,COSM1644277,COSM3355993,COSM99718,COSM99719,COSM99720,COSM10758,COSM1644277,COSM3355993,COSM99718,COSM99719,COSM99720	2820	22	biliary_tract,bone,breast,central_nervous_system,endometrium,haematopoietic_and_lymphoid_tissue,large_intestine,live...,liver,lung,oesophagus,ovary,pancreas,peritoneum,prostate,salivary_gland,skin,small_intestine,soft_tissue,stomach,upper_aerodigestive_tract,urinary_tract	59531	9524	41	NS,adrenal_gland,autonomic_ganglia,biliary_tract,bone,breast,central_nervous_system,cervix,endometrium,eye,fallopian_tube,gastrointestinal_tract_(site_indeterminate),genital_tract,haematopoietic_and_lymphoid_tissue,kidney,large_intestine,liver,lung,meninges,oesophagus,ovary,pancreas,paratesticular_tissues,penis,peritoneum,pituitary,placenta,pleura,prostate,salivary_gland,skin,small_intestine,soft…	p53, DNA-binding domain (1);p53-like transcription factor, DNA-binding (1);p53/RUNT-type transcription factor, DNA-binding domain (1);	TP53,p53,LFS1	1.7909600501297973E-5	MODERATE	missense_variant	1.0
chr17	7578204	A	T	MAH_R17017888LU01	TP53	ENSP00000398846:p.S215R,ENSP00000269305:p.S215R,ENSP00000410739:p.S215R,ENSP00000391127:p.S215R							Cell cycle inhibitors, p53 gene therapy, immunotherapies, Wee1 inhibitors, Chk1 inhibitors			Inactivating mutations of TP53 predict poorer prognosis and increased recurrence in some cancers such as breast and bladder cancer.	Biallelic Inactivation	1	1	KEEP		Somatic	0.001514200004749	0.001514200004749	COSM1268353,COSM1268354,COSM1268355,COSM1268356,COSM3701297,COSM3701298,COSM45122	27	6	liver,lung,oesophagus,ovary,prostate,stomach	59531	9524	41	NS,adrenal_gland,autonomic_ganglia,biliary_tract,bone,breast,central_nervous_system,cervix,endometrium,eye,fallopian_tube,gastrointestinal_tract_(site_indeterminate),genital_tract,haematopoietic_and_lymphoid_tissue,kidney,large_intestine,liver,lung,meninges,oesophagus,ovary,pancreas,paratesticular_tissues,penis,peritoneum,pituitary,placenta,pleura,prostate,salivary_gland,skin,small_intestine,soft…	p53, DNA-binding domain (1);p53-like transcription factor, DNA-binding (1);p53/RUNT-type transcription factor, DNA-binding domain (1);	TP53,p53,LFS1	0.0	MODERATE	missense_variant	1.0
chr17	7578212	G	A	MAH_R17017894LU01	TP53	ENSP00000391127:p.R213*,ENSP00000410739:p.R213*,ENSP00000398846:p.R213*,ENSP00000269305:p.R213*							Cell cycle inhibitors, p53 gene therapy, immunotherapies, Wee1 inhibitors, Chk1 inhibitors			Inactivating mutations of TP53 predict poorer prognosis and increased recurrence in some cancers such as breast and bladder cancer.	Biallelic Inactivation	1	1	KEEP		Somatic	0.0015753000043332577	0.0015753000043332577	COSM10654,COSM1638393,COSM3378350,COSM99615,COSM99616,COSM99617,COSM99618	1345	24	NS,biliary_tract,bone,breast,central_nervous_system,endometrium,haematopoietic_and_lymphoid_tissue,kidn...,kidney,large_intestine,liver,lung,oesophagus,ovary,pancreas,prostate,salivary_gland,skin,small_intestine,soft_tissue,stomach,thyroid,upper_aerodigestive_tract,urinary_tract	59531	9524	41	NS,adrenal_gland,autonomic_ganglia,biliary_tract,bone,breast,central_nervous_system,cervix,endometrium,eye,fallopian_tube,gastrointestinal_tract_(site_indeterminate),genital_tract,haematopoietic_and_lymphoid_tissue,kidney,large_intestine,liver,lung,meninges,oesophagus,ovary,pancreas,paratesticular_tissues,penis,peritoneum,pituitary,placenta,pleura,prostate,salivary_gland,skin,small_intestine,soft…		TP53,p53,LFS1	0.0	HIGH	stop_gained	0.0
chr17	7578404	A	T	MAH_R17017917LU01	TP53	ENSP00000410739:p.C176S,ENSP00000391127:p.C176S,ENSP00000398846:p.C176S,ENSP00000269305:p.C176S							Cell cycle inhibitors, p53 gene therapy, immunotherapies, Wee1 inhibitors, Chk1 inhibitors			Inactivating mutations of TP53 predict poorer prognosis and increased recurrence in some cancers such as breast and bladder cancer.	Biallelic Inactivation	1	1	KEEP		Somatic	8.086400157480966E-6	8.086400157480966E-6	COSM1324781,COSM1324782,COSM1324783,COSM1324784,COSM2744845,COSM3378353,COSM44146	50	10	breast,endometrium,haematopoietic_and_lymphoid_tissue,large_intestine,liver,lung,oesophagus,ovary,pancreas,prostate	59531	9524	41	NS,adrenal_gland,autonomic_ganglia,biliary_tract,bone,breast,central_nervous_system,cervix,endometrium,eye,fallopian_tube,gastrointestinal_tract_(site_indeterminate),genital_tract,haematopoietic_and_lymphoid_tissue,kidney,large_intestine,liver,lung,meninges,oesophagus,ovary,pancreas,paratesticular_tissues,penis,peritoneum,pituitary,placenta,pleura,prostate,salivary_gland,skin,small_intestine,soft…	p53, DNA-binding domain (1);p53-like transcription factor, DNA-binding (1);p53/RUNT-type transcription factor, DNA-binding domain (1);	TP53,p53,LFS1	0.0	MODERATE	missense_variant	0.9490000009536743
chr17	7578406	C	T	MAH_R17017914LU01	TP53	ENSP00000391127:p.R175H,ENSP00000398846:p.R175H,ENSP00000269305:p.R175H,ENSP00000410739:p.R175H							Cell cycle inhibitors, p53 gene therapy, immunotherapies, Wee1 inhibitors, Chk1 inhibitors			Inactivating mutations of TP53 predict poorer prognosis and increased recurrence in some cancers such as breast and bladder cancer.	Biallelic Inactivation	1	1	KEEP		Somatic	3.7856999165249844E-14	3.7856999165249844E-14	COSM10648,COSM1640851,COSM3355994,COSM99022,COSM99023,COSM99024,COSM99914,COSM10648,COSM1640851,COSM3355994,COSM99022,COSM99023,COSM99024,COSM99914,COSM10648,COSM1640851,COSM3355994,COSM99022,COSM99023,COSM99024,COSM99914,COSM10648,COSM1640851,COSM3355994,COSM99022,COSM99023,COSM99024,COSM99914	12272	29	...,NS,adrenal_gland,biliary_tract,bone,breast,central_nervous_system,cervix,endometrium,haematopoietic_and_lymphoid_tissue,kidney,large_intestine,liver,lung,oesophagus,ovary,pancreas,penis,peritoneum,prostate,salivary_gland,skin,small_intestine,soft_tissue,stomach,thyroid,upper_aerodigestive_tract,urinary_tract,vulva	59531	9524	41	NS,adrenal_gland,autonomic_ganglia,biliary_tract,bone,breast,central_nervous_system,cervix,endometrium,eye,fallopian_tube,gastrointestinal_tract_(site_indeterminate),genital_tract,haematopoietic_and_lymphoid_tissue,kidney,large_intestine,liver,lung,meninges,oesophagus,ovary,pancreas,paratesticular_tissues,penis,peritoneum,pituitary,placenta,pleura,prostate,salivary_gland,skin,small_intestine,soft…	p53, DNA-binding domain (1);p53-like transcription factor, DNA-binding (1);p53/RUNT-type transcription factor, DNA-binding domain (1);	TP53,p53,LFS1	8.96459005161887E-6	MODERATE	missense_variant	1.0
chr17	7578406	C	T	MAH_R17017909LU01	TP53	ENSP00000391127:p.R175H,ENSP00000398846:p.R175H,ENSP00000269305:p.R175H,ENSP00000410739:p.R175H							Cell cycle inhibitors, p53 gene therapy, immunotherapies, Wee1 inhibitors, Chk1 inhibitors			Inactivating mutations of TP53 predict poorer prognosis and increased recurrence in some cancers such as breast and bladder cancer.	Biallelic Inactivation	1	1	KEEP		Somatic	4.2614001358742826E-6	4.2614001358742826E-6	COSM10648,COSM1640851,COSM3355994,COSM99022,COSM99023,COSM99024,COSM99914,COSM10648,COSM1640851,COSM3355994,COSM99022,COSM99023,COSM99024,COSM99914,COSM10648,COSM1640851,COSM3355994,COSM99022,COSM99023,COSM99024,COSM99914,COSM10648,COSM1640851,COSM3355994,COSM99022,COSM99023,COSM99024,COSM99914	12272	29	...,NS,adrenal_gland,biliary_tract,bone,breast,central_nervous_system,cervix,endometrium,haematopoietic_and_lymphoid_tissue,kidney,large_intestine,liver,lung,oesophagus,ovary,pancreas,penis,peritoneum,prostate,salivary_gland,skin,small_intestine,soft_tissue,stomach,thyroid,upper_aerodigestive_tract,urinary_tract,vulva	59531	9524	41	NS,adrenal_gland,autonomic_ganglia,biliary_tract,bone,breast,central_nervous_system,cervix,endometrium,eye,fallopian_tube,gastrointestinal_tract_(site_indeterminate),genital_tract,haematopoietic_and_lymphoid_tissue,kidney,large_intestine,liver,lung,meninges,oesophagus,ovary,pancreas,paratesticular_tissues,penis,peritoneum,pituitary,placenta,pleura,prostate,salivary_gland,skin,small_intestine,soft…	p53, DNA-binding domain (1);p53-like transcription factor, DNA-binding (1);p53/RUNT-type transcription factor, DNA-binding domain (1);	TP53,p53,LFS1	8.96459005161887E-6	MODERATE	missense_variant	1.0
chr17	7578406	C	T	MAH_R17017915LU01	TP53	ENSP00000391127:p.R175H,ENSP00000398846:p.R175H,ENSP00000269305:p.R175H,ENSP00000410739:p.R175H							Cell cycle inhibitors, p53 gene therapy, immunotherapies, Wee1 inhibitors, Chk1 inhibitors			Inactivating mutations of TP53 predict poorer prognosis and increased recurrence in some cancers such as breast and bladder cancer.	Biallelic Inactivation	1	1	KEEP		Somatic	2.2247000742936507E-5	2.2247000742936507E-5	COSM10648,COSM1640851,COSM3355994,COSM99022,COSM99023,COSM99024,COSM99914,COSM10648,COSM1640851,COSM3355994,COSM99022,COSM99023,COSM99024,COSM99914,COSM10648,COSM1640851,COSM3355994,COSM99022,COSM99023,COSM99024,COSM99914,COSM10648,COSM1640851,COSM3355994,COSM99022,COSM99023,COSM99024,COSM99914	12272	29	...,NS,adrenal_gland,biliary_tract,bone,breast,central_nervous_system,cervix,endometrium,haematopoietic_and_lymphoid_tissue,kidney,large_intestine,liver,lung,oesophagus,ovary,pancreas,penis,peritoneum,prostate,salivary_gland,skin,small_intestine,soft_tissue,stomach,thyroid,upper_aerodigestive_tract,urinary_tract,vulva	59531	9524	41	NS,adrenal_gland,autonomic_ganglia,biliary_tract,bone,breast,central_nervous_system,cervix,endometrium,eye,fallopian_tube,gastrointestinal_tract_(site_indeterminate),genital_tract,haematopoietic_and_lymphoid_tissue,kidney,large_intestine,liver,lung,meninges,oesophagus,ovary,pancreas,paratesticular_tissues,penis,peritoneum,pituitary,placenta,pleura,prostate,salivary_gland,skin,small_intestine,soft…	p53, DNA-binding domain (1);p53-like transcription factor, DNA-binding (1);p53/RUNT-type transcription factor, DNA-binding domain (1);	TP53,p53,LFS1	8.96459005161887E-6	MODERATE	missense_variant	1.0
chr17	7578406	C	T	MAH_R17017890LU01	TP53	ENSP00000391127:p.R175H,ENSP00000398846:p.R175H,ENSP00000269305:p.R175H,ENSP00000410739:p.R175H							Cell cycle inhibitors, p53 gene therapy, immunotherapies, Wee1 inhibitors, Chk1 inhibitors			Inactivating mutations of TP53 predict poorer prognosis and increased recurrence in some cancers such as breast and bladder cancer.	Biallelic Inactivation	0	1	KEEP			null	null	COSM10648,COSM1640851,COSM3355994,COSM99022,COSM99023,COSM99024,COSM99914,COSM10648,COSM1640851,COSM3355994,COSM99022,COSM99023,COSM99024,COSM99914,COSM10648,COSM1640851,COSM3355994,COSM99022,COSM99023,COSM99024,COSM99914,COSM10648,COSM1640851,COSM3355994,COSM99022,COSM99023,COSM99024,COSM99914	12272	29	...,NS,adrenal_gland,biliary_tract,bone,breast,central_nervous_system,cervix,endometrium,haematopoietic_and_lymphoid_tissue,kidney,large_intestine,liver,lung,oesophagus,ovary,pancreas,penis,peritoneum,prostate,salivary_gland,skin,small_intestine,soft_tissue,stomach,thyroid,upper_aerodigestive_tract,urinary_tract,vulva	59531	9524	41	NS,adrenal_gland,autonomic_ganglia,biliary_tract,bone,breast,central_nervous_system,cervix,endometrium,eye,fallopian_tube,gastrointestinal_tract_(site_indeterminate),genital_tract,haematopoietic_and_lymphoid_tissue,kidney,large_intestine,liver,lung,meninges,oesophagus,ovary,pancreas,paratesticular_tissues,penis,peritoneum,pituitary,placenta,pleura,prostate,salivary_gland,skin,small_intestine,soft…	p53, DNA-binding domain (1);p53-like transcription factor, DNA-binding (1);p53/RUNT-type transcription factor, DNA-binding domain (1);	TP53,p53,LFS1	8.96459005161887E-6	MODERATE	missense_variant	1.0
chr17	7578500	G	A	MAH_R17017902LU01	TP53	ENSP00000410739:p.Q144*,ENSP00000391127:p.Q144*,ENSP00000398846:p.Q144*,ENSP00000269305:p.Q144*							Cell cycle inhibitors, p53 gene therapy, immunotherapies, Wee1 inhibitors, Chk1 inhibitors			Inactivating mutations of TP53 predict poorer prognosis and increased recurrence in some cancers such as breast and bladder cancer.	Biallelic Inactivation	1	1	KEEP		Somatic	5.478900106936635E-7	5.478900106936635E-7	COSM11245,COSM2744941,COSM318145,COSM318146,COSM318147,COSM318148,COSM3820722	126	14	adrenal_gland,breast,central_nervous_system,endometrium,haematopoietic_and_lymphoid_tissue,large_intestine,lung,oesophagus,ovary,prostate,soft_tissue,stomach,upper_aerodigestive_tract,urinary_tract	59531	9524	41	NS,adrenal_gland,autonomic_ganglia,biliary_tract,bone,breast,central_nervous_system,cervix,endometrium,eye,fallopian_tube,gastrointestinal_tract_(site_indeterminate),genital_tract,haematopoietic_and_lymphoid_tissue,kidney,large_intestine,liver,lung,meninges,oesophagus,ovary,pancreas,paratesticular_tissues,penis,peritoneum,pituitary,placenta,pleura,prostate,salivary_gland,skin,small_intestine,soft…		TP53,p53,LFS1	0.0	HIGH	stop_gained	0.0
chr17	7579366	G	T	MAH_R17017901LU01	TP53	ENSP00000398846:p.Y107*,ENSP00000269305:p.Y107*,ENSP00000410739:p.Y107*,ENSP00000391127:p.Y107*							Cell cycle inhibitors, p53 gene therapy, immunotherapies, Wee1 inhibitors, Chk1 inhibitors			Inactivating mutations of TP53 predict poorer prognosis and increased recurrence in some cancers such as breast and bladder cancer.	Biallelic Inactivation	1	1	KEEP		Somatic	7.26529979147017E-5	7.26529979147017E-5	COSM213589,COSM213590,COSM4487691,COSM4487692,COSM45040	15	4	breast,lung,skin,upper_aerodigestive_tract	59531	9524	41	NS,adrenal_gland,autonomic_ganglia,biliary_tract,bone,breast,central_nervous_system,cervix,endometrium,eye,fallopian_tube,gastrointestinal_tract_(site_indeterminate),genital_tract,haematopoietic_and_lymphoid_tissue,kidney,large_intestine,liver,lung,meninges,oesophagus,ovary,pancreas,paratesticular_tissues,penis,peritoneum,pituitary,placenta,pleura,prostate,salivary_gland,skin,small_intestine,soft…		TP53,p53,LFS1	0.0	HIGH	stop_gained	0.0
chr17	7579470	C	CG	MAH_R17017911LU01	TP53	ENSP00000391127:p.-70-71X,ENSP00000410739:p.-70-71X,ENSP00000269305:p.-70-71X,ENSP00000398846:p.-70-71X							Cell cycle inhibitors, p53 gene therapy, immunotherapies, Wee1 inhibitors, Chk1 inhibitors			Inactivating mutations of TP53 predict poorer prognosis and increased recurrence in some cancers such as breast and bladder cancer.	Biallelic Inactivation	0	1			Somatic	0.002287500072270632	0.002287500072270632	COSM128714,COSM128715,COSM128716,COSM2745090,COSM4336301	34	5	biliary_tract,breast,lung,skin,upper_aerodigestive_tract	59531	9524	41	NS,adrenal_gland,autonomic_ganglia,biliary_tract,bone,breast,central_nervous_system,cervix,endometrium,eye,fallopian_tube,gastrointestinal_tract_(site_indeterminate),genital_tract,haematopoietic_and_lymphoid_tissue,kidney,large_intestine,liver,lung,meninges,oesophagus,ovary,pancreas,paratesticular_tissues,penis,peritoneum,pituitary,placenta,pleura,prostate,salivary_gland,skin,small_intestine,soft…		TP53,p53,LFS1	0.0	HIGH	frameshift_variant	0.0

## Sheet: KMT2C
Chrom	Pos	Reference	Call	PN	Gene_symbol	COSMIC_HGVSp	Drug_Gene	Drug_Gene_ApprovalStatus	Drug_Pathway	Drug_Pathway_ApprovalStatus	Drug_SourcePathway	Drug_Mechanism_of_Action	Gene_ActionableDrugClasses	Gene_ActionablePathways	Gene_ActionableTumors	ResistancexSensitivity_Variants	Gene_ActionableMutations	caller_both	caller_either	mutect_judgement	mutect_failure_reasons	varscan2_somatic_status	varscan2_somatic_p_value	varscan2_variant_p_value	COSMIC_IDs	COSMIC_count_vars	COSMIC_pscount	COSMIC_primarysites	COSMIC_count_varsInGene	COSMIC_count_lociInGene	COSMIC_count_primarysitesInGene	COSMIC_primarysitesInGene	dbNSFP_Interpro_domain	GENE_Aliases	VEP_Max_Af	VEP_Max_Impact	VEP_max_consequence	VEP_max_score
chr7	151962126	C	T	MAH_BTN-001	KMT2C	ENSP00000347325:p.C394Y,ENSP00000262189:p.C394Y												0	1	REJECT		Somatic	0.0037317	0.0037317	COSM3304541,COSM3304542,COSM3304541,COSM3304542,COSM3304541,COSM3304542,COSM3304541,COSM3304542	8	1	oesophagus	5298	3010	29	NS,adrenal_gland,autonomic_ganglia,biliary_tract,bone,breast,central_nervous_system,cervix,endometrium,eye,genital_tract,haematopoietic_and_lymphoid_tissue,kidney,large_intestine,liver,lung,oesophagus,ovary,pancreas,prostate,salivary_gland,skin,small_intestine,soft_tissue,stomach,thymus,thyroid,upper_aerodigestive_tract,urinary_tract	Zinc finger, PHD-finger (2);Zinc finger, RING/FYVE/PHD-type (1);Zinc finger, RING-type (1);Zinc finger, PHD-type (1);Zinc finger, FYVE/PHD-type (1);	HALR,KIAA1506,KMT2C,MLL3	0.00444444	MODERATE	missense_variant	0.999
chr7	151962294	G	A	MAH_BTN-001	KMT2C	ENSP00000262189:p.S338L,ENSP00000347325:p.S338L												0	1	REJECT		Somatic	0.0009056	0.0009056		null	null		5298	3010	29	NS,adrenal_gland,autonomic_ganglia,biliary_tract,bone,breast,central_nervous_system,cervix,endometrium,eye,genital_tract,haematopoietic_and_lymphoid_tissue,kidney,large_intestine,liver,lung,oesophagus,ovary,pancreas,prostate,salivary_gland,skin,small_intestine,soft_tissue,stomach,thymus,thyroid,upper_aerodigestive_tract,urinary_tract	Zinc finger, RING/FYVE/PHD-type (1);Protein kinase C-like, phorbol ester/diacylglycerol binding (1);Zinc finger, FYVE/PHD-type (1);	HALR,KIAA1506,KMT2C,MLL3	0.00501303	MODERATE	missense_variant	0.999
chr7	151962296	T	C	MAH_BTN-001	KMT2C	ENSP00000347325:p.,ENSP00000262189:p.												0	1			Somatic	0.00044318	0.00044318		null	null		5298	3010	29	NS,adrenal_gland,autonomic_ganglia,biliary_tract,bone,breast,central_nervous_system,cervix,endometrium,eye,genital_tract,haematopoietic_and_lymphoid_tissue,kidney,large_intestine,liver,lung,oesophagus,ovary,pancreas,prostate,salivary_gland,skin,small_intestine,soft_tissue,stomach,thymus,thyroid,upper_aerodigestive_tract,urinary_tract		HALR,KIAA1506,KMT2C,MLL3	0.00419832	HIGH	splice_acceptor_variant	0
chr7	151878150	CA	C	MAH_BTN-003	KMT2C	ENSP00000262189:p.L2265X,ENSP00000347325:p.L2265X												0	1			Somatic	0.00033447	0.00033447		null	null		5298	3010	29	NS,adrenal_gland,autonomic_ganglia,biliary_tract,bone,breast,central_nervous_system,cervix,endometrium,eye,genital_tract,haematopoietic_and_lymphoid_tissue,kidney,large_intestine,liver,lung,oesophagus,ovary,pancreas,prostate,salivary_gland,skin,small_intestine,soft_tissue,stomach,thymus,thyroid,upper_aerodigestive_tract,urinary_tract		HALR,KIAA1506,KMT2C,MLL3	0	HIGH	frameshift_variant	0
chr7	151845766	G	A	MAH_BTN-004	KMT2C	ENSP00000347325:p.P4473S,ENSP00000262189:p.P4416S												1	1	KEEP		Somatic	1.16e-09	1.16e-09		null	null		5298	3010	29	NS,adrenal_gland,autonomic_ganglia,biliary_tract,bone,breast,central_nervous_system,cervix,endometrium,eye,genital_tract,haematopoietic_and_lymphoid_tissue,kidney,large_intestine,liver,lung,oesophagus,ovary,pancreas,prostate,salivary_gland,skin,small_intestine,soft_tissue,stomach,thymus,thyroid,upper_aerodigestive_tract,urinary_tract		HALR,KIAA1506,KMT2C,MLL3	0.0046307	MODERATE	missense_variant	0.904
chr7	151859842	GTTC	G	MAH_BTN-004	KMT2C	ENSP00000262189:p.RT3606-3607T,ENSP00000347325:p.RT3606-3607T												0	1			Somatic	0.0006345	0.0006345		null	null		5298	3010	29	NS,adrenal_gland,autonomic_ganglia,biliary_tract,bone,breast,central_nervous_system,cervix,endometrium,eye,genital_tract,haematopoietic_and_lymphoid_tissue,kidney,large_intestine,liver,lung,oesophagus,ovary,pancreas,prostate,salivary_gland,skin,small_intestine,soft_tissue,stomach,thymus,thyroid,upper_aerodigestive_tract,urinary_tract		HALR,KIAA1506,KMT2C,MLL3	0	MODERATE	inframe_deletion	0
chr7	151962294	G	A	MAH_BTN-004	KMT2C	ENSP00000262189:p.S338L,ENSP00000347325:p.S338L												0	1			Somatic	0.0036698	0.0036698		null	null		5298	3010	29	NS,adrenal_gland,autonomic_ganglia,biliary_tract,bone,breast,central_nervous_system,cervix,endometrium,eye,genital_tract,haematopoietic_and_lymphoid_tissue,kidney,large_intestine,liver,lung,oesophagus,ovary,pancreas,prostate,salivary_gland,skin,small_intestine,soft_tissue,stomach,thymus,thyroid,upper_aerodigestive_tract,urinary_tract	Zinc finger, RING/FYVE/PHD-type (1);Protein kinase C-like, phorbol ester/diacylglycerol binding (1);Zinc finger, FYVE/PHD-type (1);	HALR,KIAA1506,KMT2C,MLL3	0.00501303	MODERATE	missense_variant	0.999
chr7	151962296	T	C	MAH_BTN-004	KMT2C	ENSP00000347325:p.,ENSP00000262189:p.												0	1			Somatic	0.0017954	0.0017954		null	null		5298	3010	29	NS,adrenal_gland,autonomic_ganglia,biliary_tract,bone,breast,central_nervous_system,cervix,endometrium,eye,genital_tract,haematopoietic_and_lymphoid_tissue,kidney,large_intestine,liver,lung,oesophagus,ovary,pancreas,prostate,salivary_gland,skin,small_intestine,soft_tissue,stomach,thymus,thyroid,upper_aerodigestive_tract,urinary_tract		HALR,KIAA1506,KMT2C,MLL3	0.00419832	HIGH	splice_acceptor_variant	0
chr7	151962294	G	A	MAH_BTN-008	KMT2C	ENSP00000262189:p.S338L,ENSP00000347325:p.S338L												0	1	REJECT		Somatic	2.1729e-12	2.1729e-12		null	null		5298	3010	29	NS,adrenal_gland,autonomic_ganglia,biliary_tract,bone,breast,central_nervous_system,cervix,endometrium,eye,genital_tract,haematopoietic_and_lymphoid_tissue,kidney,large_intestine,liver,lung,oesophagus,ovary,pancreas,prostate,salivary_gland,skin,small_intestine,soft_tissue,stomach,thymus,thyroid,upper_aerodigestive_tract,urinary_tract	Zinc finger, RING/FYVE/PHD-type (1);Protein kinase C-like, phorbol ester/diacylglycerol binding (1);Zinc finger, FYVE/PHD-type (1);	HALR,KIAA1506,KMT2C,MLL3	0.00501303	MODERATE	missense_variant	0.999
chr7	151962296	T	C	MAH_BTN-008	KMT2C	ENSP00000347325:p.,ENSP00000262189:p.												0	1			Somatic	4.394e-12	4.394e-12		null	null		5298	3010	29	NS,adrenal_gland,autonomic_ganglia,biliary_tract,bone,breast,central_nervous_system,cervix,endometrium,eye,genital_tract,haematopoietic_and_lymphoid_tissue,kidney,large_intestine,liver,lung,oesophagus,ovary,pancreas,prostate,salivary_gland,skin,small_intestine,soft_tissue,stomach,thymus,thyroid,upper_aerodigestive_tract,urinary_tract		HALR,KIAA1506,KMT2C,MLL3	0.00419832	HIGH	splice_acceptor_variant	0
chr7	151878545	G	A	MAH_BTN-009	KMT2C	ENSP00000262189:p.P2134S,ENSP00000347325:p.P2134S												1	1	KEEP		Somatic	3.2589e-05	3.2589e-05		null	null		5298	3010	29	NS,adrenal_gland,autonomic_ganglia,biliary_tract,bone,breast,central_nervous_system,cervix,endometrium,eye,genital_tract,haematopoietic_and_lymphoid_tissue,kidney,large_intestine,liver,lung,oesophagus,ovary,pancreas,prostate,salivary_gland,skin,small_intestine,soft_tissue,stomach,thymus,thyroid,upper_aerodigestive_tract,urinary_tract		HALR,KIAA1506,KMT2C,MLL3	0.000151194	MODERATE	missense_variant	0.988
chr7	151962153	C	A	MAH_BTN-010	KMT2C	ENSP00000262189:p.C385F,ENSP00000347325:p.C385F												1	1	KEEP		Somatic	0.00011078	0.00011078		null	null		5298	3010	29	NS,adrenal_gland,autonomic_ganglia,biliary_tract,bone,breast,central_nervous_system,cervix,endometrium,eye,genital_tract,haematopoietic_and_lymphoid_tissue,kidney,large_intestine,liver,lung,oesophagus,ovary,pancreas,prostate,salivary_gland,skin,small_intestine,soft_tissue,stomach,thymus,thyroid,upper_aerodigestive_tract,urinary_tract	Zinc finger, PHD-finger (1);Zinc finger, RING/FYVE/PHD-type (1);Zinc finger, RING-type (2);Zinc finger, PHD-type (1);Protein kinase C-like, phorbol ester/diacylglycerol binding (1);Zinc finger, FYVE/PHD-type (1);	HALR,KIAA1506,KMT2C,MLL3	0	MODERATE	missense_variant	0.998
chr7	151962294	G	A	MAH_BTN-010	KMT2C	ENSP00000262189:p.S338L,ENSP00000347325:p.S338L												0	1			Somatic	0.0037146	0.0037146		null	null		5298	3010	29	NS,adrenal_gland,autonomic_ganglia,biliary_tract,bone,breast,central_nervous_system,cervix,endometrium,eye,genital_tract,haematopoietic_and_lymphoid_tissue,kidney,large_intestine,liver,lung,oesophagus,ovary,pancreas,prostate,salivary_gland,skin,small_intestine,soft_tissue,stomach,thymus,thyroid,upper_aerodigestive_tract,urinary_tract	Zinc finger, RING/FYVE/PHD-type (1);Protein kinase C-like, phorbol ester/diacylglycerol binding (1);Zinc finger, FYVE/PHD-type (1);	HALR,KIAA1506,KMT2C,MLL3	0.00501303	MODERATE	missense_variant	0.999
chr7	151945044	C	A	MAH_BTN-011	KMT2C	ENSP00000347325:p.M825I,ENSP00000262189:p.M825I												1	1	KEEP		Somatic	2.0666e-05	2.0666e-05		null	null		5298	3010	29	NS,adrenal_gland,autonomic_ganglia,biliary_tract,bone,breast,central_nervous_system,cervix,endometrium,eye,genital_tract,haematopoietic_and_lymphoid_tissue,kidney,large_intestine,liver,lung,oesophagus,ovary,pancreas,prostate,salivary_gland,skin,small_intestine,soft_tissue,stomach,thymus,thyroid,upper_aerodigestive_tract,urinary_tract		HALR,KIAA1506,KMT2C,MLL3	6.05694e-05	MODERATE	missense_variant	0.993
chr7	151962294	G	A	MAH_BTN-019	KMT2C	ENSP00000262189:p.S338L,ENSP00000347325:p.S338L												0	1			Somatic	0.0073643	0.0073643		null	null		5298	3010	29	NS,adrenal_gland,autonomic_ganglia,biliary_tract,bone,breast,central_nervous_system,cervix,endometrium,eye,genital_tract,haematopoietic_and_lymphoid_tissue,kidney,large_intestine,liver,lung,oesophagus,ovary,pancreas,prostate,salivary_gland,skin,small_intestine,soft_tissue,stomach,thymus,thyroid,upper_aerodigestive_tract,urinary_tract	Zinc finger, RING/FYVE/PHD-type (1);Protein kinase C-like, phorbol ester/diacylglycerol binding (1);Zinc finger, FYVE/PHD-type (1);	HALR,KIAA1506,KMT2C,MLL3	0.00501303	MODERATE	missense_variant	0.999
chr7	151962296	T	C	MAH_BTN-019	KMT2C	ENSP00000347325:p.,ENSP00000262189:p.												0	1			Somatic	0.0073439	0.0073439		null	null		5298	3010	29	NS,adrenal_gland,autonomic_ganglia,biliary_tract,bone,breast,central_nervous_system,cervix,endometrium,eye,genital_tract,haematopoietic_and_lymphoid_tissue,kidney,large_intestine,liver,lung,oesophagus,ovary,pancreas,prostate,salivary_gland,skin,small_intestine,soft_tissue,stomach,thymus,thyroid,upper_aerodigestive_tract,urinary_tract		HALR,KIAA1506,KMT2C,MLL3	0.00419832	HIGH	splice_acceptor_variant	0
chr7	151859929	T	C	MAH_BTN-021	KMT2C	ENSP00000262189:p.H3578R,ENSP00000347325:p.H3578R												1	1	KEEP		Somatic	3.594e-10	3.594e-10		null	null		5298	3010	29	NS,adrenal_gland,autonomic_ganglia,biliary_tract,bone,breast,central_nervous_system,cervix,endometrium,eye,genital_tract,haematopoietic_and_lymphoid_tissue,kidney,large_intestine,liver,lung,oesophagus,ovary,pancreas,prostate,salivary_gland,skin,small_intestine,soft_tissue,stomach,thymus,thyroid,upper_aerodigestive_tract,urinary_tract		HALR,KIAA1506,KMT2C,MLL3	0.000346821	MODERATE	missense_variant	0.22
chr7	151962294	G	A	MAH_BTN-022	KMT2C	ENSP00000262189:p.S338L,ENSP00000347325:p.S338L												0	1			Somatic	0.0036758	0.0036758		null	null		5298	3010	29	NS,adrenal_gland,autonomic_ganglia,biliary_tract,bone,breast,central_nervous_system,cervix,endometrium,eye,genital_tract,haematopoietic_and_lymphoid_tissue,kidney,large_intestine,liver,lung,oesophagus,ovary,pancreas,prostate,salivary_gland,skin,small_intestine,soft_tissue,stomach,thymus,thyroid,upper_aerodigestive_tract,urinary_tract	Zinc finger, RING/FYVE/PHD-type (1);Protein kinase C-like, phorbol ester/diacylglycerol binding (1);Zinc finger, FYVE/PHD-type (1);	HALR,KIAA1506,KMT2C,MLL3	0.00501303	MODERATE	missense_variant	0.999
chr7	151962296	T	C	MAH_BTN-022	KMT2C	ENSP00000347325:p.,ENSP00000262189:p.												0	1			Somatic	0.0074447	0.0074447		null	null		5298	3010	29	NS,adrenal_gland,autonomic_ganglia,biliary_tract,bone,breast,central_nervous_system,cervix,endometrium,eye,genital_tract,haematopoietic_and_lymphoid_tissue,kidney,large_intestine,liver,lung,oesophagus,ovary,pancreas,prostate,salivary_gland,skin,small_intestine,soft_tissue,stomach,thymus,thyroid,upper_aerodigestive_tract,urinary_tract		HALR,KIAA1506,KMT2C,MLL3	0.00419832	HIGH	splice_acceptor_variant	0
chr7	151945311	C	G	MAH_BTN-024	KMT2C	ENSP00000347325:p.L736F,ENSP00000262189:p.L736F												1	1	KEEP		Somatic	1.4473e-29	1.4473e-29		null	null		5298	3010	29	NS,adrenal_gland,autonomic_ganglia,biliary_tract,bone,breast,central_nervous_system,cervix,endometrium,eye,genital_tract,haematopoietic_and_lymphoid_tissue,kidney,large_intestine,liver,lung,oesophagus,ovary,pancreas,prostate,salivary_gland,skin,small_intestine,soft_tissue,stomach,thymus,thyroid,upper_aerodigestive_tract,urinary_tract		HALR,KIAA1506,KMT2C,MLL3	0.00060562	MODERATE	missense_variant	0
chr7	151962294	G	A	MAH_BTN-025	KMT2C	ENSP00000262189:p.S338L,ENSP00000347325:p.S338L												0	1			Somatic	0.0036657	0.0036657		null	null		5298	3010	29	NS,adrenal_gland,autonomic_ganglia,biliary_tract,bone,breast,central_nervous_system,cervix,endometrium,eye,genital_tract,haematopoietic_and_lymphoid_tissue,kidney,large_intestine,liver,lung,oesophagus,ovary,pancreas,prostate,salivary_gland,skin,small_intestine,soft_tissue,stomach,thymus,thyroid,upper_aerodigestive_tract,urinary_tract	Zinc finger, RING/FYVE/PHD-type (1);Protein kinase C-like, phorbol ester/diacylglycerol binding (1);Zinc finger, FYVE/PHD-type (1);	HALR,KIAA1506,KMT2C,MLL3	0.00501303	MODERATE	missense_variant	0.999
chr7	151962296	T	C	MAH_BTN-025	KMT2C	ENSP00000347325:p.,ENSP00000262189:p.												0	1			Somatic	0.0074256	0.0074256		null	null		5298	3010	29	NS,adrenal_gland,autonomic_ganglia,biliary_tract,bone,breast,central_nervous_system,cervix,endometrium,eye,genital_tract,haematopoietic_and_lymphoid_tissue,kidney,large_intestine,liver,lung,oesophagus,ovary,pancreas,prostate,salivary_gland,skin,small_intestine,soft_tissue,stomach,thymus,thyroid,upper_aerodigestive_tract,urinary_tract		HALR,KIAA1506,KMT2C,MLL3	0.00419832	HIGH	splice_acceptor_variant	0
chr7	151877043	G	T	MAH_BTN-026	KMT2C	ENSP00000262189:p.P2440T,ENSP00000347325:p.P2440T												1	1	KEEP		Somatic	5.8245e-09	5.8245e-09		null	null		5298	3010	29	NS,adrenal_gland,autonomic_ganglia,biliary_tract,bone,breast,central_nervous_system,cervix,endometrium,eye,genital_tract,haematopoietic_and_lymphoid_tissue,kidney,large_intestine,liver,lung,oesophagus,ovary,pancreas,prostate,salivary_gland,skin,small_intestine,soft_tissue,stomach,thymus,thyroid,upper_aerodigestive_tract,urinary_tract		HALR,KIAA1506,KMT2C,MLL3	0.0002	MODERATE	missense_variant	1
chr7	151962294	G	A	MAH_BTN-032	KMT2C	ENSP00000262189:p.S338L,ENSP00000347325:p.S338L												0	1			Somatic	0.0036047	0.0036047		null	null		5298	3010	29	NS,adrenal_gland,autonomic_ganglia,biliary_tract,bone,breast,central_nervous_system,cervix,endometrium,eye,genital_tract,haematopoietic_and_lymphoid_tissue,kidney,large_intestine,liver,lung,oesophagus,ovary,pancreas,prostate,salivary_gland,skin,small_intestine,soft_tissue,stomach,thymus,thyroid,upper_aerodigestive_tract,urinary_tract	Zinc finger, RING/FYVE/PHD-type (1);Protein kinase C-like, phorbol ester/diacylglycerol binding (1);Zinc finger, FYVE/PHD-type (1);	HALR,KIAA1506,KMT2C,MLL3	0.00501303	MODERATE	missense_variant	0.999
chr7	151962296	T	C	MAH_BTN-032	KMT2C	ENSP00000347325:p.,ENSP00000262189:p.												0	1			Somatic	0.0073272	0.0073272		null	null		5298	3010	29	NS,adrenal_gland,autonomic_ganglia,biliary_tract,bone,breast,central_nervous_system,cervix,endometrium,eye,genital_tract,haematopoietic_and_lymphoid_tissue,kidney,large_intestine,liver,lung,oesophagus,ovary,pancreas,prostate,salivary_gland,skin,small_intestine,soft_tissue,stomach,thymus,thyroid,upper_aerodigestive_tract,urinary_tract		HALR,KIAA1506,KMT2C,MLL3	0.00419832	HIGH	splice_acceptor_variant	0
chr7	151962294	G	A	MAH_BTN-035	KMT2C	ENSP00000262189:p.S338L,ENSP00000347325:p.S338L												0	1			Somatic	0.0075153	0.0075153		null	null		5298	3010	29	NS,adrenal_gland,autonomic_ganglia,biliary_tract,bone,breast,central_nervous_system,cervix,endometrium,eye,genital_tract,haematopoietic_and_lymphoid_tissue,kidney,large_intestine,liver,lung,oesophagus,ovary,pancreas,prostate,salivary_gland,skin,small_intestine,soft_tissue,stomach,thymus,thyroid,upper_aerodigestive_tract,urinary_tract	Zinc finger, RING/FYVE/PHD-type (1);Protein kinase C-like, phorbol ester/diacylglycerol binding (1);Zinc finger, FYVE/PHD-type (1);	HALR,KIAA1506,KMT2C,MLL3	0.00501303	MODERATE	missense_variant	0.999
chr7	151962296	T	C	MAH_BTN-035	KMT2C	ENSP00000347325:p.,ENSP00000262189:p.												0	1			Somatic	0.0075006	0.0075006		null	null		5298	3010	29	NS,adrenal_gland,autonomic_ganglia,biliary_tract,bone,breast,central_nervous_system,cervix,endometrium,eye,genital_tract,haematopoietic_and_lymphoid_tissue,kidney,large_intestine,liver,lung,oesophagus,ovary,pancreas,prostate,salivary_gland,skin,small_intestine,soft_tissue,stomach,thymus,thyroid,upper_aerodigestive_tract,urinary_tract		HALR,KIAA1506,KMT2C,MLL3	0.00419832	HIGH	splice_acceptor_variant	0
chr7	151970810	A	G	MAH_BTN-035	KMT2C	ENSP00000347325:p.I331T,ENSP00000262189:p.I331T												1	1	KEEP		Somatic	0.0035996	0.0035996		null	null		5298	3010	29	NS,adrenal_gland,autonomic_ganglia,biliary_tract,bone,breast,central_nervous_system,cervix,endometrium,eye,genital_tract,haematopoietic_and_lymphoid_tissue,kidney,large_intestine,liver,lung,oesophagus,ovary,pancreas,prostate,salivary_gland,skin,small_intestine,soft_tissue,stomach,thymus,thyroid,upper_aerodigestive_tract,urinary_tract	Zinc finger, PHD-type (1);Protein kinase C-like, phorbol ester/diacylglycerol binding (1);Zinc finger, FYVE/PHD-type (1);	HALR,KIAA1506,KMT2C,MLL3	0	MODERATE	missense_variant	0.817
chr7	151842355	T	C	MAH_BTN-042	KMT2C	ENSP00000347325:p.N4743S,ENSP00000262189:p.N4686S												1	1	KEEP		Somatic	2.8346e-27	2.8346e-27		null	null		5298	3010	29	NS,adrenal_gland,autonomic_ganglia,biliary_tract,bone,breast,central_nervous_system,cervix,endometrium,eye,genital_tract,haematopoietic_and_lymphoid_tissue,kidney,large_intestine,liver,lung,oesophagus,ovary,pancreas,prostate,salivary_gland,skin,small_intestine,soft_tissue,stomach,thymus,thyroid,upper_aerodigestive_tract,urinary_tract	FY-rich, C-terminal (1);FY-rich, C-terminal subgroup (1);	HALR,KIAA1506,KMT2C,MLL3	0.00685871	MODERATE	missense_variant	0.939
chr7	151970789	C	T	MAH_BTN-042	KMT2C	ENSP00000347325:p.,ENSP00000262189:p.												0	1	REJECT		Somatic	4.49e-05	4.49e-05		null	null		5298	3010	29	NS,adrenal_gland,autonomic_ganglia,biliary_tract,bone,breast,central_nervous_system,cervix,endometrium,eye,genital_tract,haematopoietic_and_lymphoid_tissue,kidney,large_intestine,liver,lung,oesophagus,ovary,pancreas,prostate,salivary_gland,skin,small_intestine,soft_tissue,stomach,thymus,thyroid,upper_aerodigestive_tract,urinary_tract		HALR,KIAA1506,KMT2C,MLL3	0.000192456	HIGH	splice_donor_variant	0
chr7	151962294	G	A	MAH_BTN-043	KMT2C	ENSP00000262189:p.S338L,ENSP00000347325:p.S338L												0	1	REJECT		Somatic	3.9776e-08	3.9776e-08		null	null		5298	3010	29	NS,adrenal_gland,autonomic_ganglia,biliary_tract,bone,breast,central_nervous_system,cervix,endometrium,eye,genital_tract,haematopoietic_and_lymphoid_tissue,kidney,large_intestine,liver,lung,oesophagus,ovary,pancreas,prostate,salivary_gland,skin,small_intestine,soft_tissue,stomach,thymus,thyroid,upper_aerodigestive_tract,urinary_tract	Zinc finger, RING/FYVE/PHD-type (1);Protein kinase C-like, phorbol ester/diacylglycerol binding (1);Zinc finger, FYVE/PHD-type (1);	HALR,KIAA1506,KMT2C,MLL3	0.00501303	MODERATE	missense_variant	0.999
chr7	151962296	T	C	MAH_BTN-043	KMT2C	ENSP00000347325:p.,ENSP00000262189:p.												0	1			Somatic	3.4299e-07	3.4299e-07		null	null		5298	3010	29	NS,adrenal_gland,autonomic_ganglia,biliary_tract,bone,breast,central_nervous_system,cervix,endometrium,eye,genital_tract,haematopoietic_and_lymphoid_tissue,kidney,large_intestine,liver,lung,oesophagus,ovary,pancreas,prostate,salivary_gland,skin,small_intestine,soft_tissue,stomach,thymus,thyroid,upper_aerodigestive_tract,urinary_tract		HALR,KIAA1506,KMT2C,MLL3	0.00419832	HIGH	splice_acceptor_variant	0
chr7	151849870	G	A	MAH_BTN-044	KMT2C	ENSP00000347325:p.P4206L,ENSP00000262189:p.P4149L												1	1	KEEP		Somatic	1.1096e-09	1.1096e-09		null	null		5298	3010	29	NS,adrenal_gland,autonomic_ganglia,biliary_tract,bone,breast,central_nervous_system,cervix,endometrium,eye,genital_tract,haematopoietic_and_lymphoid_tissue,kidney,large_intestine,liver,lung,oesophagus,ovary,pancreas,prostate,salivary_gland,skin,small_intestine,soft_tissue,stomach,thymus,thyroid,upper_aerodigestive_tract,urinary_tract		HALR,KIAA1506,KMT2C,MLL3	0	MODERATE	missense_variant	0.959
chr7	151880170	C	G	MAH_BTN-044	KMT2C	ENSP00000262189:p.R1718S,ENSP00000347325:p.R1718S												1	1	KEEP		Somatic	8.5266e-05	8.5266e-05		null	null		5298	3010	29	NS,adrenal_gland,autonomic_ganglia,biliary_tract,bone,breast,central_nervous_system,cervix,endometrium,eye,genital_tract,haematopoietic_and_lymphoid_tissue,kidney,large_intestine,liver,lung,oesophagus,ovary,pancreas,prostate,salivary_gland,skin,small_intestine,soft_tissue,stomach,thymus,thyroid,upper_aerodigestive_tract,urinary_tract		HALR,KIAA1506,KMT2C,MLL3	0	MODERATE	missense_variant	0.999
chr7	151962294	G	A	MAH_BTN-044	KMT2C	ENSP00000262189:p.S338L,ENSP00000347325:p.S338L												0	1	REJECT		Somatic	1.8668e-08	1.8668e-08		null	null		5298	3010	29	NS,adrenal_gland,autonomic_ganglia,biliary_tract,bone,breast,central_nervous_system,cervix,endometrium,eye,genital_tract,haematopoietic_and_lymphoid_tissue,kidney,large_intestine,liver,lung,oesophagus,ovary,pancreas,prostate,salivary_gland,skin,small_intestine,soft_tissue,stomach,thymus,thyroid,upper_aerodigestive_tract,urinary_tract	Zinc finger, RING/FYVE/PHD-type (1);Protein kinase C-like, phorbol ester/diacylglycerol binding (1);Zinc finger, FYVE/PHD-type (1);	HALR,KIAA1506,KMT2C,MLL3	0.00501303	MODERATE	missense_variant	0.999
chr7	151962296	T	C	MAH_BTN-044	KMT2C	ENSP00000347325:p.,ENSP00000262189:p.												0	1			Somatic	3.847e-08	3.847e-08		null	null		5298	3010	29	NS,adrenal_gland,autonomic_ganglia,biliary_tract,bone,breast,central_nervous_system,cervix,endometrium,eye,genital_tract,haematopoietic_and_lymphoid_tissue,kidney,large_intestine,liver,lung,oesophagus,ovary,pancreas,prostate,salivary_gland,skin,small_intestine,soft_tissue,stomach,thymus,thyroid,upper_aerodigestive_tract,urinary_tract		HALR,KIAA1506,KMT2C,MLL3	0.00419832	HIGH	splice_acceptor_variant	0
chr7	151962294	G	A	MAH_BTN-047	KMT2C	ENSP00000262189:p.S338L,ENSP00000347325:p.S338L												0	1			Somatic	7.6913e-08	7.6913e-08		null	null		5298	3010	29	NS,adrenal_gland,autonomic_ganglia,biliary_tract,bone,breast,central_nervous_system,cervix,endometrium,eye,genital_tract,haematopoietic_and_lymphoid_tissue,kidney,large_intestine,liver,lung,oesophagus,ovary,pancreas,prostate,salivary_gland,skin,small_intestine,soft_tissue,stomach,thymus,thyroid,upper_aerodigestive_tract,urinary_tract	Zinc finger, RING/FYVE/PHD-type (1);Protein kinase C-like, phorbol ester/diacylglycerol binding (1);Zinc finger, FYVE/PHD-type (1);	HALR,KIAA1506,KMT2C,MLL3	0.00501303	MODERATE	missense_variant	0.999
chr7	151962296	T	C	MAH_BTN-047	KMT2C	ENSP00000347325:p.,ENSP00000262189:p.												0	1			Somatic	6.8108e-07	6.8108e-07		null	null		5298	3010	29	NS,adrenal_gland,autonomic_ganglia,biliary_tract,bone,breast,central_nervous_system,cervix,endometrium,eye,genital_tract,haematopoietic_and_lymphoid_tissue,kidney,large_intestine,liver,lung,oesophagus,ovary,pancreas,prostate,salivary_gland,skin,small_intestine,soft_tissue,stomach,thymus,thyroid,upper_aerodigestive_tract,urinary_tract		HALR,KIAA1506,KMT2C,MLL3	0.00419832	HIGH	splice_acceptor_variant	0
chr7	151962153	C	A	MAH_BTN-052	KMT2C	ENSP00000262189:p.C385F,ENSP00000347325:p.C385F												1	1	KEEP		Somatic	1.2632e-09	1.2632e-09		null	null		5298	3010	29	NS,adrenal_gland,autonomic_ganglia,biliary_tract,bone,breast,central_nervous_system,cervix,endometrium,eye,genital_tract,haematopoietic_and_lymphoid_tissue,kidney,large_intestine,liver,lung,oesophagus,ovary,pancreas,prostate,salivary_gland,skin,small_intestine,soft_tissue,stomach,thymus,thyroid,upper_aerodigestive_tract,urinary_tract	Zinc finger, PHD-finger (1);Zinc finger, RING/FYVE/PHD-type (1);Zinc finger, RING-type (2);Zinc finger, PHD-type (1);Protein kinase C-like, phorbol ester/diacylglycerol binding (1);Zinc finger, FYVE/PHD-type (1);	HALR,KIAA1506,KMT2C,MLL3	0	MODERATE	missense_variant	0.998
chr7	151962294	G	A	MAH_BTN-053	KMT2C	ENSP00000262189:p.S338L,ENSP00000347325:p.S338L												0	1	REJECT		Somatic	0.0036895	0.0036895		null	null		5298	3010	29	NS,adrenal_gland,autonomic_ganglia,biliary_tract,bone,breast,central_nervous_system,cervix,endometrium,eye,genital_tract,haematopoietic_and_lymphoid_tissue,kidney,large_intestine,liver,lung,oesophagus,ovary,pancreas,prostate,salivary_gland,skin,small_intestine,soft_tissue,stomach,thymus,thyroid,upper_aerodigestive_tract,urinary_tract	Zinc finger, RING/FYVE/PHD-type (1);Protein kinase C-like, phorbol ester/diacylglycerol binding (1);Zinc finger, FYVE/PHD-type (1);	HALR,KIAA1506,KMT2C,MLL3	0.00501303	MODERATE	missense_variant	0.999
chr7	151845766	G	A	MAH_BTN-054	KMT2C	ENSP00000347325:p.P4473S,ENSP00000262189:p.P4416S												1	1	KEEP		Somatic	1.0249e-11	1.0249e-11		null	null		5298	3010	29	NS,adrenal_gland,autonomic_ganglia,biliary_tract,bone,breast,central_nervous_system,cervix,endometrium,eye,genital_tract,haematopoietic_and_lymphoid_tissue,kidney,large_intestine,liver,lung,oesophagus,ovary,pancreas,prostate,salivary_gland,skin,small_intestine,soft_tissue,stomach,thymus,thyroid,upper_aerodigestive_tract,urinary_tract		HALR,KIAA1506,KMT2C,MLL3	0.0046307	MODERATE	missense_variant	0.904
chr7	151962159	C	T	MAH_BTN-054	KMT2C	ENSP00000347325:p.W383*,ENSP00000262189:p.W383*												1	1	KEEP		Somatic	1.772e-07	1.772e-07		null	null		5298	3010	29	NS,adrenal_gland,autonomic_ganglia,biliary_tract,bone,breast,central_nervous_system,cervix,endometrium,eye,genital_tract,haematopoietic_and_lymphoid_tissue,kidney,large_intestine,liver,lung,oesophagus,ovary,pancreas,prostate,salivary_gland,skin,small_intestine,soft_tissue,stomach,thymus,thyroid,upper_aerodigestive_tract,urinary_tract		HALR,KIAA1506,KMT2C,MLL3	0	HIGH	stop_gained	0
chr7	151962153	C	A	MAH_BTN-055	KMT2C	ENSP00000262189:p.C385F,ENSP00000347325:p.C385F												1	1	KEEP		Somatic	1.853e-07	1.853e-07		null	null		5298	3010	29	NS,adrenal_gland,autonomic_ganglia,biliary_tract,bone,breast,central_nervous_system,cervix,endometrium,eye,genital_tract,haematopoietic_and_lymphoid_tissue,kidney,large_intestine,liver,lung,oesophagus,ovary,pancreas,prostate,salivary_gland,skin,small_intestine,soft_tissue,stomach,thymus,thyroid,upper_aerodigestive_tract,urinary_tract	Zinc finger, PHD-finger (1);Zinc finger, RING/FYVE/PHD-type (1);Zinc finger, RING-type (2);Zinc finger, PHD-type (1);Protein kinase C-like, phorbol ester/diacylglycerol binding (1);Zinc finger, FYVE/PHD-type (1);	HALR,KIAA1506,KMT2C,MLL3	0	MODERATE	missense_variant	0.998
chr7	151962294	G	A	MAH_BTN-055	KMT2C	ENSP00000262189:p.S338L,ENSP00000347325:p.S338L												0	1			Somatic	0.0018347	0.0018347		null	null		5298	3010	29	NS,adrenal_gland,autonomic_ganglia,biliary_tract,bone,breast,central_nervous_system,cervix,endometrium,eye,genital_tract,haematopoietic_and_lymphoid_tissue,kidney,large_intestine,liver,lung,oesophagus,ovary,pancreas,prostate,salivary_gland,skin,small_intestine,soft_tissue,stomach,thymus,thyroid,upper_aerodigestive_tract,urinary_tract	Zinc finger, RING/FYVE/PHD-type (1);Protein kinase C-like, phorbol ester/diacylglycerol binding (1);Zinc finger, FYVE/PHD-type (1);	HALR,KIAA1506,KMT2C,MLL3	0.00501303	MODERATE	missense_variant	0.999
chr7	151962296	T	C	MAH_BTN-055	KMT2C	ENSP00000347325:p.,ENSP00000262189:p.												0	1			Somatic	0.0018293	0.0018293		null	null		5298	3010	29	NS,adrenal_gland,autonomic_ganglia,biliary_tract,bone,breast,central_nervous_system,cervix,endometrium,eye,genital_tract,haematopoietic_and_lymphoid_tissue,kidney,large_intestine,liver,lung,oesophagus,ovary,pancreas,prostate,salivary_gland,skin,small_intestine,soft_tissue,stomach,thymus,thyroid,upper_aerodigestive_tract,urinary_tract		HALR,KIAA1506,KMT2C,MLL3	0.00419832	HIGH	splice_acceptor_variant	0
chr7	151878685	T	C	MAH_BTN-056	KMT2C	ENSP00000262189:p.H2087R,ENSP00000347325:p.H2087R												1	1	KEEP		Somatic	2.9054e-07	2.9054e-07		null	null		5298	3010	29	NS,adrenal_gland,autonomic_ganglia,biliary_tract,bone,breast,central_nervous_system,cervix,endometrium,eye,genital_tract,haematopoietic_and_lymphoid_tissue,kidney,large_intestine,liver,lung,oesophagus,ovary,pancreas,prostate,salivary_gland,skin,small_intestine,soft_tissue,stomach,thymus,thyroid,upper_aerodigestive_tract,urinary_tract		HALR,KIAA1506,KMT2C,MLL3	0	MODERATE	missense_variant	0.974
chr7	151878863	G	A	MAH_BTN-056	KMT2C	ENSP00000262189:p.R2028*,ENSP00000347325:p.R2028*												0	1	KEEP			null	null	COSM1087587,COSM1087588	9	4	breast,endometrium,haematopoietic_and_lymphoid_tissue,stomach	5298	3010	29	NS,adrenal_gland,autonomic_ganglia,biliary_tract,bone,breast,central_nervous_system,cervix,endometrium,eye,genital_tract,haematopoietic_and_lymphoid_tissue,kidney,large_intestine,liver,lung,oesophagus,ovary,pancreas,prostate,salivary_gland,skin,small_intestine,soft_tissue,stomach,thymus,thyroid,upper_aerodigestive_tract,urinary_tract		HALR,KIAA1506,KMT2C,MLL3	0	HIGH	stop_gained	0
chr7	151860806	G	A	MAH_BTN-059	KMT2C	ENSP00000262189:p.P3286S,ENSP00000347325:p.P3286S												1	1	KEEP		Somatic	2.7227e-11	2.7227e-11		null	null		5298	3010	29	NS,adrenal_gland,autonomic_ganglia,biliary_tract,bone,breast,central_nervous_system,cervix,endometrium,eye,genital_tract,haematopoietic_and_lymphoid_tissue,kidney,large_intestine,liver,lung,oesophagus,ovary,pancreas,prostate,salivary_gland,skin,small_intestine,soft_tissue,stomach,thymus,thyroid,upper_aerodigestive_tract,urinary_tract		HALR,KIAA1506,KMT2C,MLL3	0.000115553	MODERATE	missense_variant	0.029
chr7	151874727	T	C	MAH_BTN-061	KMT2C	ENSP00000262189:p.H2604R,ENSP00000347325:p.H2604R												1	1	KEEP		Somatic	1.041e-21	1.041e-21		null	null		5298	3010	29	NS,adrenal_gland,autonomic_ganglia,biliary_tract,bone,breast,central_nervous_system,cervix,endometrium,eye,genital_tract,haematopoietic_and_lymphoid_tissue,kidney,large_intestine,liver,lung,oesophagus,ovary,pancreas,prostate,salivary_gland,skin,small_intestine,soft_tissue,stomach,thymus,thyroid,upper_aerodigestive_tract,urinary_tract		HALR,KIAA1506,KMT2C,MLL3	0.000231107	MODERATE	missense_variant	0.667
chr7	151962294	G	A	MAH_BTN-064	KMT2C	ENSP00000262189:p.S338L,ENSP00000347325:p.S338L												0	1			Somatic	0.0075647	0.0075647		null	null		5298	3010	29	NS,adrenal_gland,autonomic_ganglia,biliary_tract,bone,breast,central_nervous_system,cervix,endometrium,eye,genital_tract,haematopoietic_and_lymphoid_tissue,kidney,large_intestine,liver,lung,oesophagus,ovary,pancreas,prostate,salivary_gland,skin,small_intestine,soft_tissue,stomach,thymus,thyroid,upper_aerodigestive_tract,urinary_tract	Zinc finger, RING/FYVE/PHD-type (1);Protein kinase C-like, phorbol ester/diacylglycerol binding (1);Zinc finger, FYVE/PHD-type (1);	HALR,KIAA1506,KMT2C,MLL3	0.00501303	MODERATE	missense_variant	0.999
chr7	151962296	T	C	MAH_BTN-064	KMT2C	ENSP00000347325:p.,ENSP00000262189:p.												0	1			Somatic	0.0075409	0.0075409		null	null		5298	3010	29	NS,adrenal_gland,autonomic_ganglia,biliary_tract,bone,breast,central_nervous_system,cervix,endometrium,eye,genital_tract,haematopoietic_and_lymphoid_tissue,kidney,large_intestine,liver,lung,oesophagus,ovary,pancreas,prostate,salivary_gland,skin,small_intestine,soft_tissue,stomach,thymus,thyroid,upper_aerodigestive_tract,urinary_tract		HALR,KIAA1506,KMT2C,MLL3	0.00419832	HIGH	splice_acceptor_variant	0
chr7	151962126	C	T	MAH_BTN-069	KMT2C	ENSP00000347325:p.C394Y,ENSP00000262189:p.C394Y												0	1	REJECT		Somatic	1.2696e-11	1.2696e-11	COSM3304541,COSM3304542,COSM3304541,COSM3304542,COSM3304541,COSM3304542,COSM3304541,COSM3304542	8	1	oesophagus	5298	3010	29	NS,adrenal_gland,autonomic_ganglia,biliary_tract,bone,breast,central_nervous_system,cervix,endometrium,eye,genital_tract,haematopoietic_and_lymphoid_tissue,kidney,large_intestine,liver,lung,oesophagus,ovary,pancreas,prostate,salivary_gland,skin,small_intestine,soft_tissue,stomach,thymus,thyroid,upper_aerodigestive_tract,urinary_tract	Zinc finger, PHD-finger (2);Zinc finger, RING/FYVE/PHD-type (1);Zinc finger, RING-type (1);Zinc finger, PHD-type (1);Zinc finger, FYVE/PHD-type (1);	HALR,KIAA1506,KMT2C,MLL3	0.00444444	MODERATE	missense_variant	0.999
chr7	151962294	G	A	MAH_BTN-069	KMT2C	ENSP00000262189:p.S338L,ENSP00000347325:p.S338L												0	1	REJECT		Somatic	1.5879e-07	1.5879e-07		null	null		5298	3010	29	NS,adrenal_gland,autonomic_ganglia,biliary_tract,bone,breast,central_nervous_system,cervix,endometrium,eye,genital_tract,haematopoietic_and_lymphoid_tissue,kidney,large_intestine,liver,lung,oesophagus,ovary,pancreas,prostate,salivary_gland,skin,small_intestine,soft_tissue,stomach,thymus,thyroid,upper_aerodigestive_tract,urinary_tract	Zinc finger, RING/FYVE/PHD-type (1);Protein kinase C-like, phorbol ester/diacylglycerol binding (1);Zinc finger, FYVE/PHD-type (1);	HALR,KIAA1506,KMT2C,MLL3	0.00501303	MODERATE	missense_variant	0.999
chr7	151962296	T	C	MAH_BTN-069	KMT2C	ENSP00000347325:p.,ENSP00000262189:p.												0	1			Somatic	2.8525e-06	2.8525e-06		null	null		5298	3010	29	NS,adrenal_gland,autonomic_ganglia,biliary_tract,bone,breast,central_nervous_system,cervix,endometrium,eye,genital_tract,haematopoietic_and_lymphoid_tissue,kidney,large_intestine,liver,lung,oesophagus,ovary,pancreas,prostate,salivary_gland,skin,small_intestine,soft_tissue,stomach,thymus,thyroid,upper_aerodigestive_tract,urinary_tract		HALR,KIAA1506,KMT2C,MLL3	0.00419832	HIGH	splice_acceptor_variant	0
chr7	151833979	C	T	MAH_BTN-074	KMT2C	ENSP00000347325:p.D4949N,ENSP00000262189:p.D4892N												1	1	KEEP		Somatic	1.8267e-08	1.8267e-08		null	null		5298	3010	29	NS,adrenal_gland,autonomic_ganglia,biliary_tract,bone,breast,central_nervous_system,cervix,endometrium,eye,genital_tract,haematopoietic_and_lymphoid_tissue,kidney,large_intestine,liver,lung,oesophagus,ovary,pancreas,prostate,salivary_gland,skin,small_intestine,soft_tissue,stomach,thymus,thyroid,upper_aerodigestive_tract,urinary_tract	SET domain (1);	HALR,KIAA1506,KMT2C,MLL3	0	MODERATE	missense_variant	1
chr7	151851093	A	C	MAH_BTN-075	KMT2C	ENSP00000347325:p.,ENSP00000262189:p.												1	1	KEEP		Somatic	7.1675e-09	7.1675e-09		null	null		5298	3010	29	NS,adrenal_gland,autonomic_ganglia,biliary_tract,bone,breast,central_nervous_system,cervix,endometrium,eye,genital_tract,haematopoietic_and_lymphoid_tissue,kidney,large_intestine,liver,lung,oesophagus,ovary,pancreas,prostate,salivary_gland,skin,small_intestine,soft_tissue,stomach,thymus,thyroid,upper_aerodigestive_tract,urinary_tract		HALR,KIAA1506,KMT2C,MLL3	0	HIGH	splice_donor_variant	0
chr7	151945100	AGG	A	MAH_BTN-076	KMT2C	ENSP00000262189:p.S806X,ENSP00000347325:p.S806X												0	1			Somatic	0.0036204	0.0036204		null	null		5298	3010	29	NS,adrenal_gland,autonomic_ganglia,biliary_tract,bone,breast,central_nervous_system,cervix,endometrium,eye,genital_tract,haematopoietic_and_lymphoid_tissue,kidney,large_intestine,liver,lung,oesophagus,ovary,pancreas,prostate,salivary_gland,skin,small_intestine,soft_tissue,stomach,thymus,thyroid,upper_aerodigestive_tract,urinary_tract		HALR,KIAA1506,KMT2C,MLL3	0.000121124	HIGH	frameshift_variant	0
chr7	151945257	G	C	MAH_BTN-077	KMT2C	ENSP00000347325:p.Y754*,ENSP00000262189:p.Y754*												1	1	KEEP		Somatic	0.0069761	0.0069761		null	null		5298	3010	29	NS,adrenal_gland,autonomic_ganglia,biliary_tract,bone,breast,central_nervous_system,cervix,endometrium,eye,genital_tract,haematopoietic_and_lymphoid_tissue,kidney,large_intestine,liver,lung,oesophagus,ovary,pancreas,prostate,salivary_gland,skin,small_intestine,soft_tissue,stomach,thymus,thyroid,upper_aerodigestive_tract,urinary_tract		HALR,KIAA1506,KMT2C,MLL3	0	HIGH	stop_gained	0
chr7	151962294	G	A	MAH_BTN-079	KMT2C	ENSP00000262189:p.S338L,ENSP00000347325:p.S338L												0	1			Somatic	0.00087833	0.00087833		null	null		5298	3010	29	NS,adrenal_gland,autonomic_ganglia,biliary_tract,bone,breast,central_nervous_system,cervix,endometrium,eye,genital_tract,haematopoietic_and_lymphoid_tissue,kidney,large_intestine,liver,lung,oesophagus,ovary,pancreas,prostate,salivary_gland,skin,small_intestine,soft_tissue,stomach,thymus,thyroid,upper_aerodigestive_tract,urinary_tract	Zinc finger, RING/FYVE/PHD-type (1);Protein kinase C-like, phorbol ester/diacylglycerol binding (1);Zinc finger, FYVE/PHD-type (1);	HALR,KIAA1506,KMT2C,MLL3	0.00501303	MODERATE	missense_variant	0.999
chr7	151962296	T	C	MAH_BTN-079	KMT2C	ENSP00000347325:p.,ENSP00000262189:p.												0	1			Somatic	0.0017864	0.0017864		null	null		5298	3010	29	NS,adrenal_gland,autonomic_ganglia,biliary_tract,bone,breast,central_nervous_system,cervix,endometrium,eye,genital_tract,haematopoietic_and_lymphoid_tissue,kidney,large_intestine,liver,lung,oesophagus,ovary,pancreas,prostate,salivary_gland,skin,small_intestine,soft_tissue,stomach,thymus,thyroid,upper_aerodigestive_tract,urinary_tract		HALR,KIAA1506,KMT2C,MLL3	0.00419832	HIGH	splice_acceptor_variant	0
chr7	152012391	T	TC	MAH_BTN-079	KMT2C	ENSP00000262189:p.E141GX,ENSP00000347325:p.E141GX												0	1			Somatic	6.7394e-05	6.7394e-05		null	null		5298	3010	29	NS,adrenal_gland,autonomic_ganglia,biliary_tract,bone,breast,central_nervous_system,cervix,endometrium,eye,genital_tract,haematopoietic_and_lymphoid_tissue,kidney,large_intestine,liver,lung,oesophagus,ovary,pancreas,prostate,salivary_gland,skin,small_intestine,soft_tissue,stomach,thymus,thyroid,upper_aerodigestive_tract,urinary_tract		HALR,KIAA1506,KMT2C,MLL3	0	HIGH	frameshift_variant	0
chr7	151962294	G	A	MAH_BTN-080	KMT2C	ENSP00000262189:p.S338L,ENSP00000347325:p.S338L												0	1	REJECT		Somatic	0.00045788	0.00045788		null	null		5298	3010	29	NS,adrenal_gland,autonomic_ganglia,biliary_tract,bone,breast,central_nervous_system,cervix,endometrium,eye,genital_tract,haematopoietic_and_lymphoid_tissue,kidney,large_intestine,liver,lung,oesophagus,ovary,pancreas,prostate,salivary_gland,skin,small_intestine,soft_tissue,stomach,thymus,thyroid,upper_aerodigestive_tract,urinary_tract	Zinc finger, RING/FYVE/PHD-type (1);Protein kinase C-like, phorbol ester/diacylglycerol binding (1);Zinc finger, FYVE/PHD-type (1);	HALR,KIAA1506,KMT2C,MLL3	0.00501303	MODERATE	missense_variant	0.999
chr7	151962296	T	C	MAH_BTN-080	KMT2C	ENSP00000347325:p.,ENSP00000262189:p.												0	1			Somatic	0.0076167	0.0076167		null	null		5298	3010	29	NS,adrenal_gland,autonomic_ganglia,biliary_tract,bone,breast,central_nervous_system,cervix,endometrium,eye,genital_tract,haematopoietic_and_lymphoid_tissue,kidney,large_intestine,liver,lung,oesophagus,ovary,pancreas,prostate,salivary_gland,skin,small_intestine,soft_tissue,stomach,thymus,thyroid,upper_aerodigestive_tract,urinary_tract		HALR,KIAA1506,KMT2C,MLL3	0.00419832	HIGH	splice_acceptor_variant	0
chr7	151878610	G	T	MAH_BTN-081	KMT2C	ENSP00000262189:p.P2112H,ENSP00000347325:p.P2112H												1	1	KEEP		Somatic	0.00038387	0.00038387		null	null		5298	3010	29	NS,adrenal_gland,autonomic_ganglia,biliary_tract,bone,breast,central_nervous_system,cervix,endometrium,eye,genital_tract,haematopoietic_and_lymphoid_tissue,kidney,large_intestine,liver,lung,oesophagus,ovary,pancreas,prostate,salivary_gland,skin,small_intestine,soft_tissue,stomach,thymus,thyroid,upper_aerodigestive_tract,urinary_tract		HALR,KIAA1506,KMT2C,MLL3	0	MODERATE	missense_variant	0.969
chr7	151962294	G	A	MAH_BTN-081	KMT2C	ENSP00000262189:p.S338L,ENSP00000347325:p.S338L												0	1			Somatic	0.0037139	0.0037139		null	null		5298	3010	29	NS,adrenal_gland,autonomic_ganglia,biliary_tract,bone,breast,central_nervous_system,cervix,endometrium,eye,genital_tract,haematopoietic_and_lymphoid_tissue,kidney,large_intestine,liver,lung,oesophagus,ovary,pancreas,prostate,salivary_gland,skin,small_intestine,soft_tissue,stomach,thymus,thyroid,upper_aerodigestive_tract,urinary_tract	Zinc finger, RING/FYVE/PHD-type (1);Protein kinase C-like, phorbol ester/diacylglycerol binding (1);Zinc finger, FYVE/PHD-type (1);	HALR,KIAA1506,KMT2C,MLL3	0.00501303	MODERATE	missense_variant	0.999
chr7	151962296	T	C	MAH_BTN-081	KMT2C	ENSP00000347325:p.,ENSP00000262189:p.												0	1			Somatic	0.0036986	0.0036986		null	null		5298	3010	29	NS,adrenal_gland,autonomic_ganglia,biliary_tract,bone,breast,central_nervous_system,cervix,endometrium,eye,genital_tract,haematopoietic_and_lymphoid_tissue,kidney,large_intestine,liver,lung,oesophagus,ovary,pancreas,prostate,salivary_gland,skin,small_intestine,soft_tissue,stomach,thymus,thyroid,upper_aerodigestive_tract,urinary_tract		HALR,KIAA1506,KMT2C,MLL3	0.00419832	HIGH	splice_acceptor_variant	0
chr7	151962126	C	T	MAH_BTN-082	KMT2C	ENSP00000347325:p.C394Y,ENSP00000262189:p.C394Y												0	1	REJECT		Somatic	1.2644e-05	1.2644e-05	COSM3304541,COSM3304542,COSM3304541,COSM3304542,COSM3304541,COSM3304542,COSM3304541,COSM3304542	8	1	oesophagus	5298	3010	29	NS,adrenal_gland,autonomic_ganglia,biliary_tract,bone,breast,central_nervous_system,cervix,endometrium,eye,genital_tract,haematopoietic_and_lymphoid_tissue,kidney,large_intestine,liver,lung,oesophagus,ovary,pancreas,prostate,salivary_gland,skin,small_intestine,soft_tissue,stomach,thymus,thyroid,upper_aerodigestive_tract,urinary_tract	Zinc finger, PHD-finger (2);Zinc finger, RING/FYVE/PHD-type (1);Zinc finger, RING-type (1);Zinc finger, PHD-type (1);Zinc finger, FYVE/PHD-type (1);	HALR,KIAA1506,KMT2C,MLL3	0.00444444	MODERATE	missense_variant	0.999
chr7	151962294	G	A	MAH_BTN-083	KMT2C	ENSP00000262189:p.S338L,ENSP00000347325:p.S338L												0	1			Somatic	0.00091529	0.00091529		null	null		5298	3010	29	NS,adrenal_gland,autonomic_ganglia,biliary_tract,bone,breast,central_nervous_system,cervix,endometrium,eye,genital_tract,haematopoietic_and_lymphoid_tissue,kidney,large_intestine,liver,lung,oesophagus,ovary,pancreas,prostate,salivary_gland,skin,small_intestine,soft_tissue,stomach,thymus,thyroid,upper_aerodigestive_tract,urinary_tract	Zinc finger, RING/FYVE/PHD-type (1);Protein kinase C-like, phorbol ester/diacylglycerol binding (1);Zinc finger, FYVE/PHD-type (1);	HALR,KIAA1506,KMT2C,MLL3	0.00501303	MODERATE	missense_variant	0.999
chr7	151962296	T	C	MAH_BTN-083	KMT2C	ENSP00000347325:p.,ENSP00000262189:p.												0	1			Somatic	0.0018452	0.0018452		null	null		5298	3010	29	NS,adrenal_gland,autonomic_ganglia,biliary_tract,bone,breast,central_nervous_system,cervix,endometrium,eye,genital_tract,haematopoietic_and_lymphoid_tissue,kidney,large_intestine,liver,lung,oesophagus,ovary,pancreas,prostate,salivary_gland,skin,small_intestine,soft_tissue,stomach,thymus,thyroid,upper_aerodigestive_tract,urinary_tract		HALR,KIAA1506,KMT2C,MLL3	0.00419832	HIGH	splice_acceptor_variant	0
chr7	151891108	G	T	MAH_BTN-084	KMT2C	ENSP00000262189:p.P1549Q,ENSP00000347325:p.P1549Q												0	1	KEEP			null	null		null	null		5298	3010	29	NS,adrenal_gland,autonomic_ganglia,biliary_tract,bone,breast,central_nervous_system,cervix,endometrium,eye,genital_tract,haematopoietic_and_lymphoid_tissue,kidney,large_intestine,liver,lung,oesophagus,ovary,pancreas,prostate,salivary_gland,skin,small_intestine,soft_tissue,stomach,thymus,thyroid,upper_aerodigestive_tract,urinary_tract		HALR,KIAA1506,KMT2C,MLL3	0	MODERATE	missense_variant	0.993
chr7	151896459	A	G	MAH_BTN-084	KMT2C	ENSP00000262189:p.L1393P,ENSP00000347325:p.L1393P												1	1	KEEP		Somatic	3.158e-10	3.158e-10		null	null		5298	3010	29	NS,adrenal_gland,autonomic_ganglia,biliary_tract,bone,breast,central_nervous_system,cervix,endometrium,eye,genital_tract,haematopoietic_and_lymphoid_tissue,kidney,large_intestine,liver,lung,oesophagus,ovary,pancreas,prostate,salivary_gland,skin,small_intestine,soft_tissue,stomach,thymus,thyroid,upper_aerodigestive_tract,urinary_tract		HALR,KIAA1506,KMT2C,MLL3	0	MODERATE	missense_variant	0.998
chr7	151879625	C	A	MAH_BTN-085	KMT2C	ENSP00000262189:p.E1774*,ENSP00000347325:p.E1774*												1	1	KEEP		Somatic	7.1369e-05	7.1369e-05		null	null		5298	3010	29	NS,adrenal_gland,autonomic_ganglia,biliary_tract,bone,breast,central_nervous_system,cervix,endometrium,eye,genital_tract,haematopoietic_and_lymphoid_tissue,kidney,large_intestine,liver,lung,oesophagus,ovary,pancreas,prostate,salivary_gland,skin,small_intestine,soft_tissue,stomach,thymus,thyroid,upper_aerodigestive_tract,urinary_tract		HALR,KIAA1506,KMT2C,MLL3	0	HIGH	stop_gained	0
chr7	152027735	C	T	MAH_BTN-086	KMT2C	ENSP00000347325:p.E114K,ENSP00000262189:p.E114K												1	1	KEEP		Somatic	5.5023e-08	5.5023e-08	COSM421523,COSM421524	2	1	urinary_tract	5298	3010	29	NS,adrenal_gland,autonomic_ganglia,biliary_tract,bone,breast,central_nervous_system,cervix,endometrium,eye,genital_tract,haematopoietic_and_lymphoid_tissue,kidney,large_intestine,liver,lung,oesophagus,ovary,pancreas,prostate,salivary_gland,skin,small_intestine,soft_tissue,stomach,thymus,thyroid,upper_aerodigestive_tract,urinary_tract		HALR,KIAA1506,KMT2C,MLL3	0	MODERATE	missense_variant	0.437
chr7	151962126	C	T	MAH_BTN-089	KMT2C	ENSP00000347325:p.C394Y,ENSP00000262189:p.C394Y												0	1	REJECT		Somatic	1.8215e-08	1.8215e-08	COSM3304541,COSM3304542,COSM3304541,COSM3304542,COSM3304541,COSM3304542,COSM3304541,COSM3304542	8	1	oesophagus	5298	3010	29	NS,adrenal_gland,autonomic_ganglia,biliary_tract,bone,breast,central_nervous_system,cervix,endometrium,eye,genital_tract,haematopoietic_and_lymphoid_tissue,kidney,large_intestine,liver,lung,oesophagus,ovary,pancreas,prostate,salivary_gland,skin,small_intestine,soft_tissue,stomach,thymus,thyroid,upper_aerodigestive_tract,urinary_tract	Zinc finger, PHD-finger (2);Zinc finger, RING/FYVE/PHD-type (1);Zinc finger, RING-type (1);Zinc finger, PHD-type (1);Zinc finger, FYVE/PHD-type (1);	HALR,KIAA1506,KMT2C,MLL3	0.00444444	MODERATE	missense_variant	0.999
chr7	151860200	T	C	MAH_BTN-091	KMT2C	ENSP00000262189:p.I3488V,ENSP00000347325:p.I3488V												1	1	KEEP		Somatic	4.8185e-09	4.8185e-09		null	null		5298	3010	29	NS,adrenal_gland,autonomic_ganglia,biliary_tract,bone,breast,central_nervous_system,cervix,endometrium,eye,genital_tract,haematopoietic_and_lymphoid_tissue,kidney,large_intestine,liver,lung,oesophagus,ovary,pancreas,prostate,salivary_gland,skin,small_intestine,soft_tissue,stomach,thymus,thyroid,upper_aerodigestive_tract,urinary_tract		HALR,KIAA1506,KMT2C,MLL3	0	MODERATE	missense_variant	0.005
chr7	151874709	C	T	MAH_BTN-092	KMT2C	ENSP00000262189:p.R2610Q,ENSP00000347325:p.R2610Q												1	1	KEEP		Somatic	1.3624e-26	1.3624e-26	COSM1581241,COSM1581242,COSM1581241,COSM1581242,COSM1581241,COSM1581242,COSM1581241,COSM1581242,COSM1581241,COSM1581242,COSM1581241,COSM1581242	60	2	haematopoietic_and_lymphoid_tissue,upper_aerodigestive_tract	5298	3010	29	NS,adrenal_gland,autonomic_ganglia,biliary_tract,bone,breast,central_nervous_system,cervix,endometrium,eye,genital_tract,haematopoietic_and_lymphoid_tissue,kidney,large_intestine,liver,lung,oesophagus,ovary,pancreas,prostate,salivary_gland,skin,small_intestine,soft_tissue,stomach,thymus,thyroid,upper_aerodigestive_tract,urinary_tract		HALR,KIAA1506,KMT2C,MLL3	0.00591716	MODERATE	missense_variant	0.072
chr7	151877980	A	G	MAH_BTN-092	KMT2C	ENSP00000347325:p.V2322A,ENSP00000262189:p.V2322A												1	1	KEEP		Somatic	5.693e-13	5.693e-13	COSM1581245,COSM1581246	10	2	haematopoietic_and_lymphoid_tissue,large_intestine	5298	3010	29	NS,adrenal_gland,autonomic_ganglia,biliary_tract,bone,breast,central_nervous_system,cervix,endometrium,eye,genital_tract,haematopoietic_and_lymphoid_tissue,kidney,large_intestine,liver,lung,oesophagus,ovary,pancreas,prostate,salivary_gland,skin,small_intestine,soft_tissue,stomach,thymus,thyroid,upper_aerodigestive_tract,urinary_tract		HALR,KIAA1506,KMT2C,MLL3	0.00591716	MODERATE	missense_variant	0.001
chr7	151962294	G	A	MAH_BTN-092	KMT2C	ENSP00000262189:p.S338L,ENSP00000347325:p.S338L												0	1			Somatic	3.0085e-06	3.0085e-06		null	null		5298	3010	29	NS,adrenal_gland,autonomic_ganglia,biliary_tract,bone,breast,central_nervous_system,cervix,endometrium,eye,genital_tract,haematopoietic_and_lymphoid_tissue,kidney,large_intestine,liver,lung,oesophagus,ovary,pancreas,prostate,salivary_gland,skin,small_intestine,soft_tissue,stomach,thymus,thyroid,upper_aerodigestive_tract,urinary_tract	Zinc finger, RING/FYVE/PHD-type (1);Protein kinase C-like, phorbol ester/diacylglycerol binding (1);Zinc finger, FYVE/PHD-type (1);	HALR,KIAA1506,KMT2C,MLL3	0.00501303	MODERATE	missense_variant	0.999
chr7	151962296	T	C	MAH_BTN-092	KMT2C	ENSP00000347325:p.,ENSP00000262189:p.												0	1			Somatic	6.1341e-06	6.1341e-06		null	null		5298	3010	29	NS,adrenal_gland,autonomic_ganglia,biliary_tract,bone,breast,central_nervous_system,cervix,endometrium,eye,genital_tract,haematopoietic_and_lymphoid_tissue,kidney,large_intestine,liver,lung,oesophagus,ovary,pancreas,prostate,salivary_gland,skin,small_intestine,soft_tissue,stomach,thymus,thyroid,upper_aerodigestive_tract,urinary_tract		HALR,KIAA1506,KMT2C,MLL3	0.00419832	HIGH	splice_acceptor_variant	0
chr7	151877980	A	G	MAH_R17017888LU01	KMT2C	ENSP00000347325:p.V2322A,ENSP00000262189:p.V2322A												1	1	KEEP		Somatic	8.540900431341925E-9	8.540900431341925E-9	COSM1581245,COSM1581246,COSM1581245,COSM1581246,COSM1581245,COSM1581246,COSM1581245,COSM1581246	40	2	haematopoietic_and_lymphoid_tissue,large_intestine	5619	3174	29	NS,adrenal_gland,autonomic_ganglia,biliary_tract,bone,breast,central_nervous_system,cervix,endometrium,eye,genital_tract,haematopoietic_and_lymphoid_tissue,kidney,large_intestine,liver,lung,oesophagus,ovary,pancreas,prostate,salivary_gland,skin,small_intestine,soft_tissue,stomach,thymus,thyroid,upper_aerodigestive_tract,urinary_tract		KMT2C,MLL3,KIAA1506,HALR	0.00678174989297986	MODERATE	missense_variant	0.0010000000474974513
chr7	151970859	C	T	MAH_R17017889LU01	KMT2C	ENSP00000262189:p.G315S,ENSP00000347325:p.G315S												0	1	REJECT		Somatic	6.033299996488495E-6	6.033299996488495E-6	COSM1179668,COSM1179669,COSM1179668,COSM1179669,COSM1179668,COSM1179669,COSM1179668,COSM1179669,COSM1179668,COSM1179669,COSM1179668,COSM1179669,COSM1179668,COSM1179669,COSM1179668,COSM1179669,COSM1179668,COSM1179669,COSM1179668,COSM1179669,COSM1179668,COSM1179669,COSM1179668,COSM1179669,COSM1179668,COSM1179669,COSM1179668,COSM1179669,COSM1179668,COSM1179669,COSM1179668,COSM1179669,COSM1179668,COS…	1040	10	biliary_tract,central_nervous_system,haematopoietic_and_lymphoid_tissue,large_intestine,liver,ovary,prostate,skin,soft...,soft_tissue	5619	3174	29	NS,adrenal_gland,autonomic_ganglia,biliary_tract,bone,breast,central_nervous_system,cervix,endometrium,eye,genital_tract,haematopoietic_and_lymphoid_tissue,kidney,large_intestine,liver,lung,oesophagus,ovary,pancreas,prostate,salivary_gland,skin,small_intestine,soft_tissue,stomach,thymus,thyroid,upper_aerodigestive_tract,urinary_tract	Zinc finger, PHD-type (1);	KMT2C,MLL3,KIAA1506,HALR	0.0	MODERATE	missense_variant	1.0
chr7	151945060	G	A	MAH_R17017890LU01	KMT2C	ENSP00000347325:p.T820I,ENSP00000262189:p.T820I												0	1	REJECT		Somatic	0.0037446001078933477	0.0037446001078933477	COSM4606481,COSM4606482,COSM4606481,COSM4606482,COSM4606481,COSM4606482,COSM4606481,COSM4606482,COSM4606481,COSM4606482,COSM4606481,COSM4606482,COSM4606481,COSM4606482,COSM4606481,COSM4606482,COSM4606481,COSM4606482,COSM4606481,COSM4606482,COSM4606481,COSM4606482,COSM4606481,COSM4606482,COSM4606481,COSM4606482,COSM4606481,COSM4606482,COSM4606481,COSM4606482,COSM4606481,COSM4606482,COSM4606481,COS…	114	4	haematopoietic_and_lymphoid_tis...,haematopoietic_and_lymphoid_tissue,large_intestine,liver	5619	3174	29	NS,adrenal_gland,autonomic_ganglia,biliary_tract,bone,breast,central_nervous_system,cervix,endometrium,eye,genital_tract,haematopoietic_and_lymphoid_tissue,kidney,large_intestine,liver,lung,oesophagus,ovary,pancreas,prostate,salivary_gland,skin,small_intestine,soft_tissue,stomach,thymus,thyroid,upper_aerodigestive_tract,urinary_tract		KMT2C,MLL3,KIAA1506,HALR	0.009999999776482582	MODERATE	missense_variant	0.9610000252723694
chr7	151962294	G	A	MAH_R17017890LU01	KMT2C	ENSP00000262189:p.S338L,ENSP00000347325:p.S338L												0	1	REJECT		Somatic	4.4010000419802964E-4	4.4010000419802964E-4	COSM6056929,COSM6056930,COSM6056929,COSM6056930,COSM6056929,COSM6056930,COSM6056929,COSM6056930,COSM6056929,COSM6056930,COSM6056929,COSM6056930,COSM6056929,COSM6056930,COSM6056929,COSM6056930,COSM6056929,COSM6056930,COSM6056929,COSM6056930,COSM6056929,COSM6056930,COSM6056929,COSM6056930,COSM6056929,COSM6056930,COSM6056929,COSM6056930,COSM6056929,COSM6056930,COSM6056929,COSM6056930,COSM6056929,COS…	36	1	large_intestine	5619	3174	29	NS,adrenal_gland,autonomic_ganglia,biliary_tract,bone,breast,central_nervous_system,cervix,endometrium,eye,genital_tract,haematopoietic_and_lymphoid_tissue,kidney,large_intestine,liver,lung,oesophagus,ovary,pancreas,prostate,salivary_gland,skin,small_intestine,soft_tissue,stomach,thymus,thyroid,upper_aerodigestive_tract,urinary_tract	Zinc finger, RING/FYVE/PHD-type (1);Protein kinase C-like, phorbol ester/diacylglycerol binding (1);Zinc finger, FYVE/PHD-type (1);	KMT2C,MLL3,KIAA1506,HALR	0.0	MODERATE	missense_variant	0.9990000128746033
chr7	151962296	T	C	MAH_R17017890LU01	KMT2C	ENSP00000347325:p.,ENSP00000262189:p.												0	1	REJECT		Somatic	4.3755999649874866E-4	4.3755999649874866E-4	COSM6056931,COSM6056932,COSM6056931,COSM6056932,COSM6056931,COSM6056932,COSM6056931,COSM6056932,COSM6056931,COSM6056932,COSM6056931,COSM6056932,COSM6056931,COSM6056932,COSM6056931,COSM6056932,COSM6056931,COSM6056932,COSM6056931,COSM6056932,COSM6056931,COSM6056932,COSM6056931,COSM6056932,COSM6056931,COSM6056932,COSM6056931,COSM6056932,COSM6056931,COSM6056932,COSM6056931,COSM6056932,COSM6056931,COS…	34	1	large_intestine	5619	3174	29	NS,adrenal_gland,autonomic_ganglia,biliary_tract,bone,breast,central_nervous_system,cervix,endometrium,eye,genital_tract,haematopoietic_and_lymphoid_tissue,kidney,large_intestine,liver,lung,oesophagus,ovary,pancreas,prostate,salivary_gland,skin,small_intestine,soft_tissue,stomach,thymus,thyroid,upper_aerodigestive_tract,urinary_tract		KMT2C,MLL3,KIAA1506,HALR	0.0	HIGH	splice_acceptor_variant	0.0
chr7	151970859	C	T	MAH_R17017890LU01	KMT2C	ENSP00000262189:p.G315S,ENSP00000347325:p.G315S												0	1	REJECT		Somatic	5.030000102124177E-5	5.030000102124177E-5	COSM1179668,COSM1179669,COSM1179668,COSM1179669,COSM1179668,COSM1179669,COSM1179668,COSM1179669,COSM1179668,COSM1179669,COSM1179668,COSM1179669,COSM1179668,COSM1179669,COSM1179668,COSM1179669,COSM1179668,COSM1179669,COSM1179668,COSM1179669,COSM1179668,COSM1179669,COSM1179668,COSM1179669,COSM1179668,COSM1179669,COSM1179668,COSM1179669,COSM1179668,COSM1179669,COSM1179668,COSM1179669,COSM1179668,COS…	1040	10	biliary_tract,central_nervous_system,haematopoietic_and_lymphoid_tissue,large_intestine,liver,ovary,prostate,skin,soft...,soft_tissue	5619	3174	29	NS,adrenal_gland,autonomic_ganglia,biliary_tract,bone,breast,central_nervous_system,cervix,endometrium,eye,genital_tract,haematopoietic_and_lymphoid_tissue,kidney,large_intestine,liver,lung,oesophagus,ovary,pancreas,prostate,salivary_gland,skin,small_intestine,soft_tissue,stomach,thymus,thyroid,upper_aerodigestive_tract,urinary_tract	Zinc finger, PHD-type (1);	KMT2C,MLL3,KIAA1506,HALR	0.0	MODERATE	missense_variant	1.0
chr7	151945060	G	A	MAH_R17017892LU01	KMT2C	ENSP00000347325:p.T820I,ENSP00000262189:p.T820I												0	1	REJECT		Somatic	0.0037422000896185637	0.0037422000896185637	COSM4606481,COSM4606482,COSM4606481,COSM4606482,COSM4606481,COSM4606482,COSM4606481,COSM4606482,COSM4606481,COSM4606482,COSM4606481,COSM4606482,COSM4606481,COSM4606482,COSM4606481,COSM4606482,COSM4606481,COSM4606482,COSM4606481,COSM4606482,COSM4606481,COSM4606482,COSM4606481,COSM4606482,COSM4606481,COSM4606482,COSM4606481,COSM4606482,COSM4606481,COSM4606482,COSM4606481,COSM4606482,COSM4606481,COS…	114	4	haematopoietic_and_lymphoid_tis...,haematopoietic_and_lymphoid_tissue,large_intestine,liver	5619	3174	29	NS,adrenal_gland,autonomic_ganglia,biliary_tract,bone,breast,central_nervous_system,cervix,endometrium,eye,genital_tract,haematopoietic_and_lymphoid_tissue,kidney,large_intestine,liver,lung,oesophagus,ovary,pancreas,prostate,salivary_gland,skin,small_intestine,soft_tissue,stomach,thymus,thyroid,upper_aerodigestive_tract,urinary_tract		KMT2C,MLL3,KIAA1506,HALR	0.009999999776482582	MODERATE	missense_variant	0.9610000252723694
chr7	151945060	G	A	MAH_R17017895LU01	KMT2C	ENSP00000347325:p.T820I,ENSP00000262189:p.T820I												0	1	REJECT		Somatic	4.4574998901225626E-4	4.4574998901225626E-4	COSM4606481,COSM4606482,COSM4606481,COSM4606482,COSM4606481,COSM4606482,COSM4606481,COSM4606482,COSM4606481,COSM4606482,COSM4606481,COSM4606482,COSM4606481,COSM4606482,COSM4606481,COSM4606482,COSM4606481,COSM4606482,COSM4606481,COSM4606482,COSM4606481,COSM4606482,COSM4606481,COSM4606482,COSM4606481,COSM4606482,COSM4606481,COSM4606482,COSM4606481,COSM4606482,COSM4606481,COSM4606482,COSM4606481,COS…	114	4	haematopoietic_and_lymphoid_tis...,haematopoietic_and_lymphoid_tissue,large_intestine,liver	5619	3174	29	NS,adrenal_gland,autonomic_ganglia,biliary_tract,bone,breast,central_nervous_system,cervix,endometrium,eye,genital_tract,haematopoietic_and_lymphoid_tissue,kidney,large_intestine,liver,lung,oesophagus,ovary,pancreas,prostate,salivary_gland,skin,small_intestine,soft_tissue,stomach,thymus,thyroid,upper_aerodigestive_tract,urinary_tract		KMT2C,MLL3,KIAA1506,HALR	0.009999999776482582	MODERATE	missense_variant	0.9610000252723694
chr7	151962294	G	A	MAH_R17017896LU01	KMT2C	ENSP00000262189:p.S338L,ENSP00000347325:p.S338L												0	1	REJECT		Somatic	3.255099954913021E-6	3.255099954913021E-6	COSM6056929,COSM6056930,COSM6056929,COSM6056930,COSM6056929,COSM6056930,COSM6056929,COSM6056930,COSM6056929,COSM6056930,COSM6056929,COSM6056930,COSM6056929,COSM6056930,COSM6056929,COSM6056930,COSM6056929,COSM6056930,COSM6056929,COSM6056930,COSM6056929,COSM6056930,COSM6056929,COSM6056930,COSM6056929,COSM6056930,COSM6056929,COSM6056930,COSM6056929,COSM6056930,COSM6056929,COSM6056930,COSM6056929,COS…	36	1	large_intestine	5619	3174	29	NS,adrenal_gland,autonomic_ganglia,biliary_tract,bone,breast,central_nervous_system,cervix,endometrium,eye,genital_tract,haematopoietic_and_lymphoid_tissue,kidney,large_intestine,liver,lung,oesophagus,ovary,pancreas,prostate,salivary_gland,skin,small_intestine,soft_tissue,stomach,thymus,thyroid,upper_aerodigestive_tract,urinary_tract	Zinc finger, RING/FYVE/PHD-type (1);Protein kinase C-like, phorbol ester/diacylglycerol binding (1);Zinc finger, FYVE/PHD-type (1);	KMT2C,MLL3,KIAA1506,HALR	0.0	MODERATE	missense_variant	0.9990000128746033
chr7	151962296	T	C	MAH_R17017896LU01	KMT2C	ENSP00000347325:p.,ENSP00000262189:p.												0	1	REJECT		Somatic	3.2317000204784563E-6	3.2317000204784563E-6	COSM6056931,COSM6056932,COSM6056931,COSM6056932,COSM6056931,COSM6056932,COSM6056931,COSM6056932,COSM6056931,COSM6056932,COSM6056931,COSM6056932,COSM6056931,COSM6056932,COSM6056931,COSM6056932,COSM6056931,COSM6056932,COSM6056931,COSM6056932,COSM6056931,COSM6056932,COSM6056931,COSM6056932,COSM6056931,COSM6056932,COSM6056931,COSM6056932,COSM6056931,COSM6056932,COSM6056931,COSM6056932,COSM6056931,COS…	34	1	large_intestine	5619	3174	29	NS,adrenal_gland,autonomic_ganglia,biliary_tract,bone,breast,central_nervous_system,cervix,endometrium,eye,genital_tract,haematopoietic_and_lymphoid_tissue,kidney,large_intestine,liver,lung,oesophagus,ovary,pancreas,prostate,salivary_gland,skin,small_intestine,soft_tissue,stomach,thymus,thyroid,upper_aerodigestive_tract,urinary_tract		KMT2C,MLL3,KIAA1506,HALR	0.0	HIGH	splice_acceptor_variant	0.0
chr7	151970859	C	T	MAH_R17017896LU01	KMT2C	ENSP00000262189:p.G315S,ENSP00000347325:p.G315S												0	1	REJECT		Somatic	1.4936999832571018E-6	1.4936999832571018E-6	COSM1179668,COSM1179669,COSM1179668,COSM1179669,COSM1179668,COSM1179669,COSM1179668,COSM1179669,COSM1179668,COSM1179669,COSM1179668,COSM1179669,COSM1179668,COSM1179669,COSM1179668,COSM1179669,COSM1179668,COSM1179669,COSM1179668,COSM1179669,COSM1179668,COSM1179669,COSM1179668,COSM1179669,COSM1179668,COSM1179669,COSM1179668,COSM1179669,COSM1179668,COSM1179669,COSM1179668,COSM1179669,COSM1179668,COS…	1040	10	biliary_tract,central_nervous_system,haematopoietic_and_lymphoid_tissue,large_intestine,liver,ovary,prostate,skin,soft...,soft_tissue	5619	3174	29	NS,adrenal_gland,autonomic_ganglia,biliary_tract,bone,breast,central_nervous_system,cervix,endometrium,eye,genital_tract,haematopoietic_and_lymphoid_tissue,kidney,large_intestine,liver,lung,oesophagus,ovary,pancreas,prostate,salivary_gland,skin,small_intestine,soft_tissue,stomach,thymus,thyroid,upper_aerodigestive_tract,urinary_tract	Zinc finger, PHD-type (1);	KMT2C,MLL3,KIAA1506,HALR	0.0	MODERATE	missense_variant	1.0
chr7	151962294	G	A	MAH_R17017897LU01	KMT2C	ENSP00000262189:p.S338L,ENSP00000347325:p.S338L												0	1	REJECT		Somatic	4.5416998909786344E-4	4.5416998909786344E-4	COSM6056929,COSM6056930,COSM6056929,COSM6056930,COSM6056929,COSM6056930,COSM6056929,COSM6056930,COSM6056929,COSM6056930,COSM6056929,COSM6056930,COSM6056929,COSM6056930,COSM6056929,COSM6056930,COSM6056929,COSM6056930,COSM6056929,COSM6056930,COSM6056929,COSM6056930,COSM6056929,COSM6056930,COSM6056929,COSM6056930,COSM6056929,COSM6056930,COSM6056929,COSM6056930,COSM6056929,COSM6056930,COSM6056929,COS…	36	1	large_intestine	5619	3174	29	NS,adrenal_gland,autonomic_ganglia,biliary_tract,bone,breast,central_nervous_system,cervix,endometrium,eye,genital_tract,haematopoietic_and_lymphoid_tissue,kidney,large_intestine,liver,lung,oesophagus,ovary,pancreas,prostate,salivary_gland,skin,small_intestine,soft_tissue,stomach,thymus,thyroid,upper_aerodigestive_tract,urinary_tract	Zinc finger, RING/FYVE/PHD-type (1);Protein kinase C-like, phorbol ester/diacylglycerol binding (1);Zinc finger, FYVE/PHD-type (1);	KMT2C,MLL3,KIAA1506,HALR	0.0	MODERATE	missense_variant	0.9990000128746033
chr7	151962296	T	C	MAH_R17017897LU01	KMT2C	ENSP00000347325:p.,ENSP00000262189:p.												0	1	REJECT		Somatic	4.5243999920785427E-4	4.5243999920785427E-4	COSM6056931,COSM6056932,COSM6056931,COSM6056932,COSM6056931,COSM6056932,COSM6056931,COSM6056932,COSM6056931,COSM6056932,COSM6056931,COSM6056932,COSM6056931,COSM6056932,COSM6056931,COSM6056932,COSM6056931,COSM6056932,COSM6056931,COSM6056932,COSM6056931,COSM6056932,COSM6056931,COSM6056932,COSM6056931,COSM6056932,COSM6056931,COSM6056932,COSM6056931,COSM6056932,COSM6056931,COSM6056932,COSM6056931,COS…	34	1	large_intestine	5619	3174	29	NS,adrenal_gland,autonomic_ganglia,biliary_tract,bone,breast,central_nervous_system,cervix,endometrium,eye,genital_tract,haematopoietic_and_lymphoid_tissue,kidney,large_intestine,liver,lung,oesophagus,ovary,pancreas,prostate,salivary_gland,skin,small_intestine,soft_tissue,stomach,thymus,thyroid,upper_aerodigestive_tract,urinary_tract		KMT2C,MLL3,KIAA1506,HALR	0.0	HIGH	splice_acceptor_variant	0.0
chr7	151970859	C	T	MAH_R17017897LU01	KMT2C	ENSP00000262189:p.G315S,ENSP00000347325:p.G315S												0	1	REJECT		Somatic	4.4348000665195286E-4	4.4348000665195286E-4	COSM1179668,COSM1179669,COSM1179668,COSM1179669,COSM1179668,COSM1179669,COSM1179668,COSM1179669,COSM1179668,COSM1179669,COSM1179668,COSM1179669,COSM1179668,COSM1179669,COSM1179668,COSM1179669,COSM1179668,COSM1179669,COSM1179668,COSM1179669,COSM1179668,COSM1179669,COSM1179668,COSM1179669,COSM1179668,COSM1179669,COSM1179668,COSM1179669,COSM1179668,COSM1179669,COSM1179668,COSM1179669,COSM1179668,COS…	1040	10	biliary_tract,central_nervous_system,haematopoietic_and_lymphoid_tissue,large_intestine,liver,ovary,prostate,skin,soft...,soft_tissue	5619	3174	29	NS,adrenal_gland,autonomic_ganglia,biliary_tract,bone,breast,central_nervous_system,cervix,endometrium,eye,genital_tract,haematopoietic_and_lymphoid_tissue,kidney,large_intestine,liver,lung,oesophagus,ovary,pancreas,prostate,salivary_gland,skin,small_intestine,soft_tissue,stomach,thymus,thyroid,upper_aerodigestive_tract,urinary_tract	Zinc finger, PHD-type (1);	KMT2C,MLL3,KIAA1506,HALR	0.0	MODERATE	missense_variant	1.0
chr7	151962294	G	A	MAH_R17017898LU01	KMT2C	ENSP00000262189:p.S338L,ENSP00000347325:p.S338L												0	1	REJECT		Somatic	1.327700010733679E-5	1.327700010733679E-5	COSM6056929,COSM6056930,COSM6056929,COSM6056930,COSM6056929,COSM6056930,COSM6056929,COSM6056930,COSM6056929,COSM6056930,COSM6056929,COSM6056930,COSM6056929,COSM6056930,COSM6056929,COSM6056930,COSM6056929,COSM6056930,COSM6056929,COSM6056930,COSM6056929,COSM6056930,COSM6056929,COSM6056930,COSM6056929,COSM6056930,COSM6056929,COSM6056930,COSM6056929,COSM6056930,COSM6056929,COSM6056930,COSM6056929,COS…	36	1	large_intestine	5619	3174	29	NS,adrenal_gland,autonomic_ganglia,biliary_tract,bone,breast,central_nervous_system,cervix,endometrium,eye,genital_tract,haematopoietic_and_lymphoid_tissue,kidney,large_intestine,liver,lung,oesophagus,ovary,pancreas,prostate,salivary_gland,skin,small_intestine,soft_tissue,stomach,thymus,thyroid,upper_aerodigestive_tract,urinary_tract	Zinc finger, RING/FYVE/PHD-type (1);Protein kinase C-like, phorbol ester/diacylglycerol binding (1);Zinc finger, FYVE/PHD-type (1);	KMT2C,MLL3,KIAA1506,HALR	0.0	MODERATE	missense_variant	0.9990000128746033
chr7	151962296	T	C	MAH_R17017898LU01	KMT2C	ENSP00000347325:p.,ENSP00000262189:p.												0	1	REJECT		Somatic	2.681399928405881E-5	2.681399928405881E-5	COSM6056931,COSM6056932,COSM6056931,COSM6056932,COSM6056931,COSM6056932,COSM6056931,COSM6056932,COSM6056931,COSM6056932,COSM6056931,COSM6056932,COSM6056931,COSM6056932,COSM6056931,COSM6056932,COSM6056931,COSM6056932,COSM6056931,COSM6056932,COSM6056931,COSM6056932,COSM6056931,COSM6056932,COSM6056931,COSM6056932,COSM6056931,COSM6056932,COSM6056931,COSM6056932,COSM6056931,COSM6056932,COSM6056931,COS…	34	1	large_intestine	5619	3174	29	NS,adrenal_gland,autonomic_ganglia,biliary_tract,bone,breast,central_nervous_system,cervix,endometrium,eye,genital_tract,haematopoietic_and_lymphoid_tissue,kidney,large_intestine,liver,lung,oesophagus,ovary,pancreas,prostate,salivary_gland,skin,small_intestine,soft_tissue,stomach,thymus,thyroid,upper_aerodigestive_tract,urinary_tract		KMT2C,MLL3,KIAA1506,HALR	0.0	HIGH	splice_acceptor_variant	0.0
chr7	151945060	G	A	MAH_R17017900LU01	KMT2C	ENSP00000347325:p.T820I,ENSP00000262189:p.T820I												0	1	REJECT		Somatic	0.007663600146770477	0.007663600146770477	COSM4606481,COSM4606482,COSM4606481,COSM4606482,COSM4606481,COSM4606482,COSM4606481,COSM4606482,COSM4606481,COSM4606482,COSM4606481,COSM4606482,COSM4606481,COSM4606482,COSM4606481,COSM4606482,COSM4606481,COSM4606482,COSM4606481,COSM4606482,COSM4606481,COSM4606482,COSM4606481,COSM4606482,COSM4606481,COSM4606482,COSM4606481,COSM4606482,COSM4606481,COSM4606482,COSM4606481,COSM4606482,COSM4606481,COS…	114	4	haematopoietic_and_lymphoid_tis...,haematopoietic_and_lymphoid_tissue,large_intestine,liver	5619	3174	29	NS,adrenal_gland,autonomic_ganglia,biliary_tract,bone,breast,central_nervous_system,cervix,endometrium,eye,genital_tract,haematopoietic_and_lymphoid_tissue,kidney,large_intestine,liver,lung,oesophagus,ovary,pancreas,prostate,salivary_gland,skin,small_intestine,soft_tissue,stomach,thymus,thyroid,upper_aerodigestive_tract,urinary_tract		KMT2C,MLL3,KIAA1506,HALR	0.009999999776482582	MODERATE	missense_variant	0.9610000252723694
chr7	151962294	G	A	MAH_R17017900LU01	KMT2C	ENSP00000262189:p.S338L,ENSP00000347325:p.S338L												0	1	REJECT		Somatic	4.28520010586908E-8	4.28520010586908E-8	COSM6056929,COSM6056930,COSM6056929,COSM6056930,COSM6056929,COSM6056930,COSM6056929,COSM6056930,COSM6056929,COSM6056930,COSM6056929,COSM6056930,COSM6056929,COSM6056930,COSM6056929,COSM6056930,COSM6056929,COSM6056930,COSM6056929,COSM6056930,COSM6056929,COSM6056930,COSM6056929,COSM6056930,COSM6056929,COSM6056930,COSM6056929,COSM6056930,COSM6056929,COSM6056930,COSM6056929,COSM6056930,COSM6056929,COS…	36	1	large_intestine	5619	3174	29	NS,adrenal_gland,autonomic_ganglia,biliary_tract,bone,breast,central_nervous_system,cervix,endometrium,eye,genital_tract,haematopoietic_and_lymphoid_tissue,kidney,large_intestine,liver,lung,oesophagus,ovary,pancreas,prostate,salivary_gland,skin,small_intestine,soft_tissue,stomach,thymus,thyroid,upper_aerodigestive_tract,urinary_tract	Zinc finger, RING/FYVE/PHD-type (1);Protein kinase C-like, phorbol ester/diacylglycerol binding (1);Zinc finger, FYVE/PHD-type (1);	KMT2C,MLL3,KIAA1506,HALR	0.0	MODERATE	missense_variant	0.9990000128746033
chr7	151962296	T	C	MAH_R17017900LU01	KMT2C	ENSP00000347325:p.,ENSP00000262189:p.												0	1	REJECT		Somatic	4.196200009687345E-8	4.196200009687345E-8	COSM6056931,COSM6056932,COSM6056931,COSM6056932,COSM6056931,COSM6056932,COSM6056931,COSM6056932,COSM6056931,COSM6056932,COSM6056931,COSM6056932,COSM6056931,COSM6056932,COSM6056931,COSM6056932,COSM6056931,COSM6056932,COSM6056931,COSM6056932,COSM6056931,COSM6056932,COSM6056931,COSM6056932,COSM6056931,COSM6056932,COSM6056931,COSM6056932,COSM6056931,COSM6056932,COSM6056931,COSM6056932,COSM6056931,COS…	34	1	large_intestine	5619	3174	29	NS,adrenal_gland,autonomic_ganglia,biliary_tract,bone,breast,central_nervous_system,cervix,endometrium,eye,genital_tract,haematopoietic_and_lymphoid_tissue,kidney,large_intestine,liver,lung,oesophagus,ovary,pancreas,prostate,salivary_gland,skin,small_intestine,soft_tissue,stomach,thymus,thyroid,upper_aerodigestive_tract,urinary_tract		KMT2C,MLL3,KIAA1506,HALR	0.0	HIGH	splice_acceptor_variant	0.0
chr7	151970859	C	T	MAH_R17017900LU01	KMT2C	ENSP00000262189:p.G315S,ENSP00000347325:p.G315S												0	1	REJECT		Somatic	1.636999940046735E-7	1.636999940046735E-7	COSM1179668,COSM1179669,COSM1179668,COSM1179669,COSM1179668,COSM1179669,COSM1179668,COSM1179669,COSM1179668,COSM1179669,COSM1179668,COSM1179669,COSM1179668,COSM1179669,COSM1179668,COSM1179669,COSM1179668,COSM1179669,COSM1179668,COSM1179669,COSM1179668,COSM1179669,COSM1179668,COSM1179669,COSM1179668,COSM1179669,COSM1179668,COSM1179669,COSM1179668,COSM1179669,COSM1179668,COSM1179669,COSM1179668,COS…	1040	10	biliary_tract,central_nervous_system,haematopoietic_and_lymphoid_tissue,large_intestine,liver,ovary,prostate,skin,soft...,soft_tissue	5619	3174	29	NS,adrenal_gland,autonomic_ganglia,biliary_tract,bone,breast,central_nervous_system,cervix,endometrium,eye,genital_tract,haematopoietic_and_lymphoid_tissue,kidney,large_intestine,liver,lung,oesophagus,ovary,pancreas,prostate,salivary_gland,skin,small_intestine,soft_tissue,stomach,thymus,thyroid,upper_aerodigestive_tract,urinary_tract	Zinc finger, PHD-type (1);	KMT2C,MLL3,KIAA1506,HALR	0.0	MODERATE	missense_variant	1.0
chr7	151962153	C	A	MAH_R17017901LU01	KMT2C	ENSP00000262189:p.C385F,ENSP00000347325:p.C385F												1	1	KEEP		Somatic	3.812799934090519E-25	3.812799934090519E-25		null	null		5619	3174	29	NS,adrenal_gland,autonomic_ganglia,biliary_tract,bone,breast,central_nervous_system,cervix,endometrium,eye,genital_tract,haematopoietic_and_lymphoid_tissue,kidney,large_intestine,liver,lung,oesophagus,ovary,pancreas,prostate,salivary_gland,skin,small_intestine,soft_tissue,stomach,thymus,thyroid,upper_aerodigestive_tract,urinary_tract	Zinc finger, PHD-finger (1);Zinc finger, RING/FYVE/PHD-type (1);Zinc finger, RING-type (2);Zinc finger, PHD-type (1);Protein kinase C-like, phorbol ester/diacylglycerol binding (1);Zinc finger, FYVE/PHD-type (1);	KMT2C,MLL3,KIAA1506,HALR	0.0	MODERATE	missense_variant	0.9980000257492065
chr7	151962294	G	A	MAH_R17017901LU01	KMT2C	ENSP00000262189:p.S338L,ENSP00000347325:p.S338L												0	1	REJECT		Somatic	4.165699962754843E-8	4.165699962754843E-8	COSM6056929,COSM6056930,COSM6056929,COSM6056930,COSM6056929,COSM6056930,COSM6056929,COSM6056930,COSM6056929,COSM6056930,COSM6056929,COSM6056930,COSM6056929,COSM6056930,COSM6056929,COSM6056930,COSM6056929,COSM6056930,COSM6056929,COSM6056930,COSM6056929,COSM6056930,COSM6056929,COSM6056930,COSM6056929,COSM6056930,COSM6056929,COSM6056930,COSM6056929,COSM6056930,COSM6056929,COSM6056930,COSM6056929,COS…	36	1	large_intestine	5619	3174	29	NS,adrenal_gland,autonomic_ganglia,biliary_tract,bone,breast,central_nervous_system,cervix,endometrium,eye,genital_tract,haematopoietic_and_lymphoid_tissue,kidney,large_intestine,liver,lung,oesophagus,ovary,pancreas,prostate,salivary_gland,skin,small_intestine,soft_tissue,stomach,thymus,thyroid,upper_aerodigestive_tract,urinary_tract	Zinc finger, RING/FYVE/PHD-type (1);Protein kinase C-like, phorbol ester/diacylglycerol binding (1);Zinc finger, FYVE/PHD-type (1);	KMT2C,MLL3,KIAA1506,HALR	0.0	MODERATE	missense_variant	0.9990000128746033
chr7	151962296	T	C	MAH_R17017901LU01	KMT2C	ENSP00000347325:p.,ENSP00000262189:p.												0	1	REJECT		Somatic	1.5115999758563703E-6	1.5115999758563703E-6	COSM6056931,COSM6056932,COSM6056931,COSM6056932,COSM6056931,COSM6056932,COSM6056931,COSM6056932,COSM6056931,COSM6056932,COSM6056931,COSM6056932,COSM6056931,COSM6056932,COSM6056931,COSM6056932,COSM6056931,COSM6056932,COSM6056931,COSM6056932,COSM6056931,COSM6056932,COSM6056931,COSM6056932,COSM6056931,COSM6056932,COSM6056931,COSM6056932,COSM6056931,COSM6056932,COSM6056931,COSM6056932,COSM6056931,COS…	34	1	large_intestine	5619	3174	29	NS,adrenal_gland,autonomic_ganglia,biliary_tract,bone,breast,central_nervous_system,cervix,endometrium,eye,genital_tract,haematopoietic_and_lymphoid_tissue,kidney,large_intestine,liver,lung,oesophagus,ovary,pancreas,prostate,salivary_gland,skin,small_intestine,soft_tissue,stomach,thymus,thyroid,upper_aerodigestive_tract,urinary_tract		KMT2C,MLL3,KIAA1506,HALR	0.0	HIGH	splice_acceptor_variant	0.0
chr7	151970859	C	T	MAH_R17017901LU01	KMT2C	ENSP00000262189:p.G315S,ENSP00000347325:p.G315S												0	1	REJECT		Somatic	9.017299744300544E-4	9.017299744300544E-4	COSM1179668,COSM1179669,COSM1179668,COSM1179669,COSM1179668,COSM1179669,COSM1179668,COSM1179669,COSM1179668,COSM1179669,COSM1179668,COSM1179669,COSM1179668,COSM1179669,COSM1179668,COSM1179669,COSM1179668,COSM1179669,COSM1179668,COSM1179669,COSM1179668,COSM1179669,COSM1179668,COSM1179669,COSM1179668,COSM1179669,COSM1179668,COSM1179669,COSM1179668,COSM1179669,COSM1179668,COSM1179669,COSM1179668,COS…	1040	10	biliary_tract,central_nervous_system,haematopoietic_and_lymphoid_tissue,large_intestine,liver,ovary,prostate,skin,soft...,soft_tissue	5619	3174	29	NS,adrenal_gland,autonomic_ganglia,biliary_tract,bone,breast,central_nervous_system,cervix,endometrium,eye,genital_tract,haematopoietic_and_lymphoid_tissue,kidney,large_intestine,liver,lung,oesophagus,ovary,pancreas,prostate,salivary_gland,skin,small_intestine,soft_tissue,stomach,thymus,thyroid,upper_aerodigestive_tract,urinary_tract	Zinc finger, PHD-type (1);	KMT2C,MLL3,KIAA1506,HALR	0.0	MODERATE	missense_variant	1.0
chr7	151877980	A	G	MAH_R17017902LU01	KMT2C	ENSP00000347325:p.V2322A,ENSP00000262189:p.V2322A												1	1	KEEP		Somatic	1.550199995395418E-15	1.550199995395418E-15	COSM1581245,COSM1581246,COSM1581245,COSM1581246,COSM1581245,COSM1581246,COSM1581245,COSM1581246	40	2	haematopoietic_and_lymphoid_tissue,large_intestine	5619	3174	29	NS,adrenal_gland,autonomic_ganglia,biliary_tract,bone,breast,central_nervous_system,cervix,endometrium,eye,genital_tract,haematopoietic_and_lymphoid_tissue,kidney,large_intestine,liver,lung,oesophagus,ovary,pancreas,prostate,salivary_gland,skin,small_intestine,soft_tissue,stomach,thymus,thyroid,upper_aerodigestive_tract,urinary_tract		KMT2C,MLL3,KIAA1506,HALR	0.00678174989297986	MODERATE	missense_variant	0.0010000000474974513
chr7	151945060	G	A	MAH_R17017902LU01	KMT2C	ENSP00000347325:p.T820I,ENSP00000262189:p.T820I												0	1	REJECT		Somatic	0.0018832000205293298	0.0018832000205293298	COSM4606481,COSM4606482,COSM4606481,COSM4606482,COSM4606481,COSM4606482,COSM4606481,COSM4606482,COSM4606481,COSM4606482,COSM4606481,COSM4606482,COSM4606481,COSM4606482,COSM4606481,COSM4606482,COSM4606481,COSM4606482,COSM4606481,COSM4606482,COSM4606481,COSM4606482,COSM4606481,COSM4606482,COSM4606481,COSM4606482,COSM4606481,COSM4606482,COSM4606481,COSM4606482,COSM4606481,COSM4606482,COSM4606481,COS…	114	4	haematopoietic_and_lymphoid_tis...,haematopoietic_and_lymphoid_tissue,large_intestine,liver	5619	3174	29	NS,adrenal_gland,autonomic_ganglia,biliary_tract,bone,breast,central_nervous_system,cervix,endometrium,eye,genital_tract,haematopoietic_and_lymphoid_tissue,kidney,large_intestine,liver,lung,oesophagus,ovary,pancreas,prostate,salivary_gland,skin,small_intestine,soft_tissue,stomach,thymus,thyroid,upper_aerodigestive_tract,urinary_tract		KMT2C,MLL3,KIAA1506,HALR	0.009999999776482582	MODERATE	missense_variant	0.9610000252723694
chr7	151945325	G	A	MAH_R17017902LU01	KMT2C	ENSP00000347325:p.L732F,ENSP00000262189:p.L732F												1	1	KEEP		Somatic	1.441600034814543E-30	1.441600034814543E-30	COSM6109527,COSM6109528	2	1	lung	5619	3174	29	NS,adrenal_gland,autonomic_ganglia,biliary_tract,bone,breast,central_nervous_system,cervix,endometrium,eye,genital_tract,haematopoietic_and_lymphoid_tissue,kidney,large_intestine,liver,lung,oesophagus,ovary,pancreas,prostate,salivary_gland,skin,small_intestine,soft_tissue,stomach,thymus,thyroid,upper_aerodigestive_tract,urinary_tract		KMT2C,MLL3,KIAA1506,HALR	0.002612330252304673	MODERATE	missense_variant	0.0010000000474974513
chr7	151962294	G	A	MAH_R17017902LU01	KMT2C	ENSP00000262189:p.S338L,ENSP00000347325:p.S338L												0	1	REJECT		Somatic	2.2359000286087394E-4	2.2359000286087394E-4	COSM6056929,COSM6056930,COSM6056929,COSM6056930,COSM6056929,COSM6056930,COSM6056929,COSM6056930,COSM6056929,COSM6056930,COSM6056929,COSM6056930,COSM6056929,COSM6056930,COSM6056929,COSM6056930,COSM6056929,COSM6056930,COSM6056929,COSM6056930,COSM6056929,COSM6056930,COSM6056929,COSM6056930,COSM6056929,COSM6056930,COSM6056929,COSM6056930,COSM6056929,COSM6056930,COSM6056929,COSM6056930,COSM6056929,COS…	36	1	large_intestine	5619	3174	29	NS,adrenal_gland,autonomic_ganglia,biliary_tract,bone,breast,central_nervous_system,cervix,endometrium,eye,genital_tract,haematopoietic_and_lymphoid_tissue,kidney,large_intestine,liver,lung,oesophagus,ovary,pancreas,prostate,salivary_gland,skin,small_intestine,soft_tissue,stomach,thymus,thyroid,upper_aerodigestive_tract,urinary_tract	Zinc finger, RING/FYVE/PHD-type (1);Protein kinase C-like, phorbol ester/diacylglycerol binding (1);Zinc finger, FYVE/PHD-type (1);	KMT2C,MLL3,KIAA1506,HALR	0.0	MODERATE	missense_variant	0.9990000128746033
chr7	151962296	T	C	MAH_R17017902LU01	KMT2C	ENSP00000347325:p.,ENSP00000262189:p.												0	1	REJECT		Somatic	0.0037557000759989023	0.0037557000759989023	COSM6056931,COSM6056932,COSM6056931,COSM6056932,COSM6056931,COSM6056932,COSM6056931,COSM6056932,COSM6056931,COSM6056932,COSM6056931,COSM6056932,COSM6056931,COSM6056932,COSM6056931,COSM6056932,COSM6056931,COSM6056932,COSM6056931,COSM6056932,COSM6056931,COSM6056932,COSM6056931,COSM6056932,COSM6056931,COSM6056932,COSM6056931,COSM6056932,COSM6056931,COSM6056932,COSM6056931,COSM6056932,COSM6056931,COS…	34	1	large_intestine	5619	3174	29	NS,adrenal_gland,autonomic_ganglia,biliary_tract,bone,breast,central_nervous_system,cervix,endometrium,eye,genital_tract,haematopoietic_and_lymphoid_tissue,kidney,large_intestine,liver,lung,oesophagus,ovary,pancreas,prostate,salivary_gland,skin,small_intestine,soft_tissue,stomach,thymus,thyroid,upper_aerodigestive_tract,urinary_tract		KMT2C,MLL3,KIAA1506,HALR	0.0	HIGH	splice_acceptor_variant	0.0
chr7	151970859	C	T	MAH_R17017902LU01	KMT2C	ENSP00000262189:p.G315S,ENSP00000347325:p.G315S												0	1	REJECT		Somatic	1.7480999758845428E-7	1.7480999758845428E-7	COSM1179668,COSM1179669,COSM1179668,COSM1179669,COSM1179668,COSM1179669,COSM1179668,COSM1179669,COSM1179668,COSM1179669,COSM1179668,COSM1179669,COSM1179668,COSM1179669,COSM1179668,COSM1179669,COSM1179668,COSM1179669,COSM1179668,COSM1179669,COSM1179668,COSM1179669,COSM1179668,COSM1179669,COSM1179668,COSM1179669,COSM1179668,COSM1179669,COSM1179668,COSM1179669,COSM1179668,COSM1179669,COSM1179668,COS…	1040	10	biliary_tract,central_nervous_system,haematopoietic_and_lymphoid_tissue,large_intestine,liver,ovary,prostate,skin,soft...,soft_tissue	5619	3174	29	NS,adrenal_gland,autonomic_ganglia,biliary_tract,bone,breast,central_nervous_system,cervix,endometrium,eye,genital_tract,haematopoietic_and_lymphoid_tissue,kidney,large_intestine,liver,lung,oesophagus,ovary,pancreas,prostate,salivary_gland,skin,small_intestine,soft_tissue,stomach,thymus,thyroid,upper_aerodigestive_tract,urinary_tract	Zinc finger, PHD-type (1);	KMT2C,MLL3,KIAA1506,HALR	0.0	MODERATE	missense_variant	1.0
chr7	151962294	G	A	MAH_R17017903LU01	KMT2C	ENSP00000262189:p.S338L,ENSP00000347325:p.S338L												0	1	REJECT		Somatic	2.0293999813958408E-9	2.0293999813958408E-9	COSM6056929,COSM6056930,COSM6056929,COSM6056930,COSM6056929,COSM6056930,COSM6056929,COSM6056930,COSM6056929,COSM6056930,COSM6056929,COSM6056930,COSM6056929,COSM6056930,COSM6056929,COSM6056930,COSM6056929,COSM6056930,COSM6056929,COSM6056930,COSM6056929,COSM6056930,COSM6056929,COSM6056930,COSM6056929,COSM6056930,COSM6056929,COSM6056930,COSM6056929,COSM6056930,COSM6056929,COSM6056930,COSM6056929,COS…	36	1	large_intestine	5619	3174	29	NS,adrenal_gland,autonomic_ganglia,biliary_tract,bone,breast,central_nervous_system,cervix,endometrium,eye,genital_tract,haematopoietic_and_lymphoid_tissue,kidney,large_intestine,liver,lung,oesophagus,ovary,pancreas,prostate,salivary_gland,skin,small_intestine,soft_tissue,stomach,thymus,thyroid,upper_aerodigestive_tract,urinary_tract	Zinc finger, RING/FYVE/PHD-type (1);Protein kinase C-like, phorbol ester/diacylglycerol binding (1);Zinc finger, FYVE/PHD-type (1);	KMT2C,MLL3,KIAA1506,HALR	0.0	MODERATE	missense_variant	0.9990000128746033
chr7	151962296	T	C	MAH_R17017903LU01	KMT2C	ENSP00000347325:p.,ENSP00000262189:p.												0	1	REJECT		Somatic	8.560300024385015E-9	8.560300024385015E-9	COSM6056931,COSM6056932,COSM6056931,COSM6056932,COSM6056931,COSM6056932,COSM6056931,COSM6056932,COSM6056931,COSM6056932,COSM6056931,COSM6056932,COSM6056931,COSM6056932,COSM6056931,COSM6056932,COSM6056931,COSM6056932,COSM6056931,COSM6056932,COSM6056931,COSM6056932,COSM6056931,COSM6056932,COSM6056931,COSM6056932,COSM6056931,COSM6056932,COSM6056931,COSM6056932,COSM6056931,COSM6056932,COSM6056931,COS…	34	1	large_intestine	5619	3174	29	NS,adrenal_gland,autonomic_ganglia,biliary_tract,bone,breast,central_nervous_system,cervix,endometrium,eye,genital_tract,haematopoietic_and_lymphoid_tissue,kidney,large_intestine,liver,lung,oesophagus,ovary,pancreas,prostate,salivary_gland,skin,small_intestine,soft_tissue,stomach,thymus,thyroid,upper_aerodigestive_tract,urinary_tract		KMT2C,MLL3,KIAA1506,HALR	0.0	HIGH	splice_acceptor_variant	0.0
chr7	151970859	C	T	MAH_R17017903LU01	KMT2C	ENSP00000262189:p.G315S,ENSP00000347325:p.G315S												0	1	REJECT		Somatic	1.690800033316009E-8	1.690800033316009E-8	COSM1179668,COSM1179669,COSM1179668,COSM1179669,COSM1179668,COSM1179669,COSM1179668,COSM1179669,COSM1179668,COSM1179669,COSM1179668,COSM1179669,COSM1179668,COSM1179669,COSM1179668,COSM1179669,COSM1179668,COSM1179669,COSM1179668,COSM1179669,COSM1179668,COSM1179669,COSM1179668,COSM1179669,COSM1179668,COSM1179669,COSM1179668,COSM1179669,COSM1179668,COSM1179669,COSM1179668,COSM1179669,COSM1179668,COS…	1040	10	biliary_tract,central_nervous_system,haematopoietic_and_lymphoid_tissue,large_intestine,liver,ovary,prostate,skin,soft...,soft_tissue	5619	3174	29	NS,adrenal_gland,autonomic_ganglia,biliary_tract,bone,breast,central_nervous_system,cervix,endometrium,eye,genital_tract,haematopoietic_and_lymphoid_tissue,kidney,large_intestine,liver,lung,oesophagus,ovary,pancreas,prostate,salivary_gland,skin,small_intestine,soft_tissue,stomach,thymus,thyroid,upper_aerodigestive_tract,urinary_tract	Zinc finger, PHD-type (1);	KMT2C,MLL3,KIAA1506,HALR	0.0	MODERATE	missense_variant	1.0
chr7	151842355	T	C	MAH_R17017904LU01	KMT2C	ENSP00000347325:p.N4743S,ENSP00000262189:p.N4686S												1	1	KEEP		Somatic	4.4675001475980025E-8	4.4675001475980025E-8		null	null		5619	3174	29	NS,adrenal_gland,autonomic_ganglia,biliary_tract,bone,breast,central_nervous_system,cervix,endometrium,eye,genital_tract,haematopoietic_and_lymphoid_tissue,kidney,large_intestine,liver,lung,oesophagus,ovary,pancreas,prostate,salivary_gland,skin,small_intestine,soft_tissue,stomach,thymus,thyroid,upper_aerodigestive_tract,urinary_tract	FY-rich, C-terminal (1);FY-rich, C-terminal subgroup (1);	KMT2C,MLL3,KIAA1506,HALR	0.009864360094070435	MODERATE	missense_variant	0.9390000104904175
chr7	151962294	G	A	MAH_R17017905LU01	KMT2C	ENSP00000262189:p.S338L,ENSP00000347325:p.S338L												0	1	REJECT		Somatic	0.003777399891987443	0.003777399891987443	COSM6056929,COSM6056930,COSM6056929,COSM6056930,COSM6056929,COSM6056930,COSM6056929,COSM6056930,COSM6056929,COSM6056930,COSM6056929,COSM6056930,COSM6056929,COSM6056930,COSM6056929,COSM6056930,COSM6056929,COSM6056930,COSM6056929,COSM6056930,COSM6056929,COSM6056930,COSM6056929,COSM6056930,COSM6056929,COSM6056930,COSM6056929,COSM6056930,COSM6056929,COSM6056930,COSM6056929,COSM6056930,COSM6056929,COS…	36	1	large_intestine	5619	3174	29	NS,adrenal_gland,autonomic_ganglia,biliary_tract,bone,breast,central_nervous_system,cervix,endometrium,eye,genital_tract,haematopoietic_and_lymphoid_tissue,kidney,large_intestine,liver,lung,oesophagus,ovary,pancreas,prostate,salivary_gland,skin,small_intestine,soft_tissue,stomach,thymus,thyroid,upper_aerodigestive_tract,urinary_tract	Zinc finger, RING/FYVE/PHD-type (1);Protein kinase C-like, phorbol ester/diacylglycerol binding (1);Zinc finger, FYVE/PHD-type (1);	KMT2C,MLL3,KIAA1506,HALR	0.0	MODERATE	missense_variant	0.9990000128746033
chr7	151962296	T	C	MAH_R17017905LU01	KMT2C	ENSP00000347325:p.,ENSP00000262189:p.												0	1	REJECT		Somatic	0.00761000020429492	0.00761000020429492	COSM6056931,COSM6056932,COSM6056931,COSM6056932,COSM6056931,COSM6056932,COSM6056931,COSM6056932,COSM6056931,COSM6056932,COSM6056931,COSM6056932,COSM6056931,COSM6056932,COSM6056931,COSM6056932,COSM6056931,COSM6056932,COSM6056931,COSM6056932,COSM6056931,COSM6056932,COSM6056931,COSM6056932,COSM6056931,COSM6056932,COSM6056931,COSM6056932,COSM6056931,COSM6056932,COSM6056931,COSM6056932,COSM6056931,COS…	34	1	large_intestine	5619	3174	29	NS,adrenal_gland,autonomic_ganglia,biliary_tract,bone,breast,central_nervous_system,cervix,endometrium,eye,genital_tract,haematopoietic_and_lymphoid_tissue,kidney,large_intestine,liver,lung,oesophagus,ovary,pancreas,prostate,salivary_gland,skin,small_intestine,soft_tissue,stomach,thymus,thyroid,upper_aerodigestive_tract,urinary_tract		KMT2C,MLL3,KIAA1506,HALR	0.0	HIGH	splice_acceptor_variant	0.0
chr7	151970859	C	T	MAH_R17017905LU01	KMT2C	ENSP00000262189:p.G315S,ENSP00000347325:p.G315S												0	1	REJECT		Somatic	0.0037396999541670084	0.0037396999541670084	COSM1179668,COSM1179669,COSM1179668,COSM1179669,COSM1179668,COSM1179669,COSM1179668,COSM1179669,COSM1179668,COSM1179669,COSM1179668,COSM1179669,COSM1179668,COSM1179669,COSM1179668,COSM1179669,COSM1179668,COSM1179669,COSM1179668,COSM1179669,COSM1179668,COSM1179669,COSM1179668,COSM1179669,COSM1179668,COSM1179669,COSM1179668,COSM1179669,COSM1179668,COSM1179669,COSM1179668,COSM1179669,COSM1179668,COS…	1040	10	biliary_tract,central_nervous_system,haematopoietic_and_lymphoid_tissue,large_intestine,liver,ovary,prostate,skin,soft...,soft_tissue	5619	3174	29	NS,adrenal_gland,autonomic_ganglia,biliary_tract,bone,breast,central_nervous_system,cervix,endometrium,eye,genital_tract,haematopoietic_and_lymphoid_tissue,kidney,large_intestine,liver,lung,oesophagus,ovary,pancreas,prostate,salivary_gland,skin,small_intestine,soft_tissue,stomach,thymus,thyroid,upper_aerodigestive_tract,urinary_tract	Zinc finger, PHD-type (1);	KMT2C,MLL3,KIAA1506,HALR	0.0	MODERATE	missense_variant	1.0
chr7	151849946	T	C	MAH_R17017906LU01	KMT2C	ENSP00000347325:p.M4181V,ENSP00000262189:p.M4124V												1	1	KEEP		Somatic	0.0	0.0		null	null		5619	3174	29	NS,adrenal_gland,autonomic_ganglia,biliary_tract,bone,breast,central_nervous_system,cervix,endometrium,eye,genital_tract,haematopoietic_and_lymphoid_tissue,kidney,large_intestine,liver,lung,oesophagus,ovary,pancreas,prostate,salivary_gland,skin,small_intestine,soft_tissue,stomach,thymus,thyroid,upper_aerodigestive_tract,urinary_tract		KMT2C,MLL3,KIAA1506,HALR	1.739332074066624E-4	MODERATE	missense_variant	0.0010000000474974513
chr7	151970859	C	T	MAH_R17017906LU01	KMT2C	ENSP00000262189:p.G315S,ENSP00000347325:p.G315S												0	1	REJECT		Somatic	0.003470000112429261	0.003470000112429261	COSM1179668,COSM1179669,COSM1179668,COSM1179669,COSM1179668,COSM1179669,COSM1179668,COSM1179669,COSM1179668,COSM1179669,COSM1179668,COSM1179669,COSM1179668,COSM1179669,COSM1179668,COSM1179669,COSM1179668,COSM1179669,COSM1179668,COSM1179669,COSM1179668,COSM1179669,COSM1179668,COSM1179669,COSM1179668,COSM1179669,COSM1179668,COSM1179669,COSM1179668,COSM1179669,COSM1179668,COSM1179669,COSM1179668,COS…	1040	10	biliary_tract,central_nervous_system,haematopoietic_and_lymphoid_tissue,large_intestine,liver,ovary,prostate,skin,soft...,soft_tissue	5619	3174	29	NS,adrenal_gland,autonomic_ganglia,biliary_tract,bone,breast,central_nervous_system,cervix,endometrium,eye,genital_tract,haematopoietic_and_lymphoid_tissue,kidney,large_intestine,liver,lung,oesophagus,ovary,pancreas,prostate,salivary_gland,skin,small_intestine,soft_tissue,stomach,thymus,thyroid,upper_aerodigestive_tract,urinary_tract	Zinc finger, PHD-type (1);	KMT2C,MLL3,KIAA1506,HALR	0.0	MODERATE	missense_variant	1.0
chr7	151877980	A	G	MAH_R17017907LU01	KMT2C	ENSP00000347325:p.V2322A,ENSP00000262189:p.V2322A												1	1	KEEP		Somatic	1.2136999849587937E-8	1.2136999849587937E-8	COSM1581245,COSM1581246,COSM1581245,COSM1581246,COSM1581245,COSM1581246,COSM1581245,COSM1581246	40	2	haematopoietic_and_lymphoid_tissue,large_intestine	5619	3174	29	NS,adrenal_gland,autonomic_ganglia,biliary_tract,bone,breast,central_nervous_system,cervix,endometrium,eye,genital_tract,haematopoietic_and_lymphoid_tissue,kidney,large_intestine,liver,lung,oesophagus,ovary,pancreas,prostate,salivary_gland,skin,small_intestine,soft_tissue,stomach,thymus,thyroid,upper_aerodigestive_tract,urinary_tract		KMT2C,MLL3,KIAA1506,HALR	0.00678174989297986	MODERATE	missense_variant	0.0010000000474974513
chr7	151962294	G	A	MAH_R17017907LU01	KMT2C	ENSP00000262189:p.S338L,ENSP00000347325:p.S338L												0	1	REJECT		Somatic	1.2757999684254173E-5	1.2757999684254173E-5	COSM6056929,COSM6056930,COSM6056929,COSM6056930,COSM6056929,COSM6056930,COSM6056929,COSM6056930,COSM6056929,COSM6056930,COSM6056929,COSM6056930,COSM6056929,COSM6056930,COSM6056929,COSM6056930,COSM6056929,COSM6056930,COSM6056929,COSM6056930,COSM6056929,COSM6056930,COSM6056929,COSM6056930,COSM6056929,COSM6056930,COSM6056929,COSM6056930,COSM6056929,COSM6056930,COSM6056929,COSM6056930,COSM6056929,COS…	36	1	large_intestine	5619	3174	29	NS,adrenal_gland,autonomic_ganglia,biliary_tract,bone,breast,central_nervous_system,cervix,endometrium,eye,genital_tract,haematopoietic_and_lymphoid_tissue,kidney,large_intestine,liver,lung,oesophagus,ovary,pancreas,prostate,salivary_gland,skin,small_intestine,soft_tissue,stomach,thymus,thyroid,upper_aerodigestive_tract,urinary_tract	Zinc finger, RING/FYVE/PHD-type (1);Protein kinase C-like, phorbol ester/diacylglycerol binding (1);Zinc finger, FYVE/PHD-type (1);	KMT2C,MLL3,KIAA1506,HALR	0.0	MODERATE	missense_variant	0.9990000128746033
chr7	151962296	T	C	MAH_R17017907LU01	KMT2C	ENSP00000347325:p.,ENSP00000262189:p.												0	1	REJECT		Somatic	5.290400076773949E-5	5.290400076773949E-5	COSM6056931,COSM6056932,COSM6056931,COSM6056932,COSM6056931,COSM6056932,COSM6056931,COSM6056932,COSM6056931,COSM6056932,COSM6056931,COSM6056932,COSM6056931,COSM6056932,COSM6056931,COSM6056932,COSM6056931,COSM6056932,COSM6056931,COSM6056932,COSM6056931,COSM6056932,COSM6056931,COSM6056932,COSM6056931,COSM6056932,COSM6056931,COSM6056932,COSM6056931,COSM6056932,COSM6056931,COSM6056932,COSM6056931,COS…	34	1	large_intestine	5619	3174	29	NS,adrenal_gland,autonomic_ganglia,biliary_tract,bone,breast,central_nervous_system,cervix,endometrium,eye,genital_tract,haematopoietic_and_lymphoid_tissue,kidney,large_intestine,liver,lung,oesophagus,ovary,pancreas,prostate,salivary_gland,skin,small_intestine,soft_tissue,stomach,thymus,thyroid,upper_aerodigestive_tract,urinary_tract		KMT2C,MLL3,KIAA1506,HALR	0.0	HIGH	splice_acceptor_variant	0.0
chr7	151970859	C	T	MAH_R17017907LU01	KMT2C	ENSP00000262189:p.G315S,ENSP00000347325:p.G315S												0	1	REJECT		Somatic	1.0574999760137871E-4	1.0574999760137871E-4	COSM1179668,COSM1179669,COSM1179668,COSM1179669,COSM1179668,COSM1179669,COSM1179668,COSM1179669,COSM1179668,COSM1179669,COSM1179668,COSM1179669,COSM1179668,COSM1179669,COSM1179668,COSM1179669,COSM1179668,COSM1179669,COSM1179668,COSM1179669,COSM1179668,COSM1179669,COSM1179668,COSM1179669,COSM1179668,COSM1179669,COSM1179668,COSM1179669,COSM1179668,COSM1179669,COSM1179668,COSM1179669,COSM1179668,COS…	1040	10	biliary_tract,central_nervous_system,haematopoietic_and_lymphoid_tissue,large_intestine,liver,ovary,prostate,skin,soft...,soft_tissue	5619	3174	29	NS,adrenal_gland,autonomic_ganglia,biliary_tract,bone,breast,central_nervous_system,cervix,endometrium,eye,genital_tract,haematopoietic_and_lymphoid_tissue,kidney,large_intestine,liver,lung,oesophagus,ovary,pancreas,prostate,salivary_gland,skin,small_intestine,soft_tissue,stomach,thymus,thyroid,upper_aerodigestive_tract,urinary_tract	Zinc finger, PHD-type (1);	KMT2C,MLL3,KIAA1506,HALR	0.0	MODERATE	missense_variant	1.0
chr7	151877980	A	G	MAH_R17017908LU01	KMT2C	ENSP00000347325:p.V2322A,ENSP00000262189:p.V2322A												1	1	KEEP		Somatic	4.6015002226340584E-6	4.6015002226340584E-6	COSM1581245,COSM1581246,COSM1581245,COSM1581246,COSM1581245,COSM1581246,COSM1581245,COSM1581246	40	2	haematopoietic_and_lymphoid_tissue,large_intestine	5619	3174	29	NS,adrenal_gland,autonomic_ganglia,biliary_tract,bone,breast,central_nervous_system,cervix,endometrium,eye,genital_tract,haematopoietic_and_lymphoid_tissue,kidney,large_intestine,liver,lung,oesophagus,ovary,pancreas,prostate,salivary_gland,skin,small_intestine,soft_tissue,stomach,thymus,thyroid,upper_aerodigestive_tract,urinary_tract		KMT2C,MLL3,KIAA1506,HALR	0.00678174989297986	MODERATE	missense_variant	0.0010000000474974513
chr7	151962294	G	A	MAH_R17017908LU01	KMT2C	ENSP00000262189:p.S338L,ENSP00000347325:p.S338L												0	1	REJECT		Somatic	0.0036806000862270594	0.0036806000862270594	COSM6056929,COSM6056930,COSM6056929,COSM6056930,COSM6056929,COSM6056930,COSM6056929,COSM6056930,COSM6056929,COSM6056930,COSM6056929,COSM6056930,COSM6056929,COSM6056930,COSM6056929,COSM6056930,COSM6056929,COSM6056930,COSM6056929,COSM6056930,COSM6056929,COSM6056930,COSM6056929,COSM6056930,COSM6056929,COSM6056930,COSM6056929,COSM6056930,COSM6056929,COSM6056930,COSM6056929,COSM6056930,COSM6056929,COS…	36	1	large_intestine	5619	3174	29	NS,adrenal_gland,autonomic_ganglia,biliary_tract,bone,breast,central_nervous_system,cervix,endometrium,eye,genital_tract,haematopoietic_and_lymphoid_tissue,kidney,large_intestine,liver,lung,oesophagus,ovary,pancreas,prostate,salivary_gland,skin,small_intestine,soft_tissue,stomach,thymus,thyroid,upper_aerodigestive_tract,urinary_tract	Zinc finger, RING/FYVE/PHD-type (1);Protein kinase C-like, phorbol ester/diacylglycerol binding (1);Zinc finger, FYVE/PHD-type (1);	KMT2C,MLL3,KIAA1506,HALR	0.0	MODERATE	missense_variant	0.9990000128746033
chr7	151962296	T	C	MAH_R17017908LU01	KMT2C	ENSP00000347325:p.,ENSP00000262189:p.												0	1			Somatic	0.007432799786329269	0.007432799786329269	COSM6056931,COSM6056932,COSM6056931,COSM6056932,COSM6056931,COSM6056932,COSM6056931,COSM6056932,COSM6056931,COSM6056932,COSM6056931,COSM6056932,COSM6056931,COSM6056932,COSM6056931,COSM6056932,COSM6056931,COSM6056932,COSM6056931,COSM6056932,COSM6056931,COSM6056932,COSM6056931,COSM6056932,COSM6056931,COSM6056932,COSM6056931,COSM6056932,COSM6056931,COSM6056932,COSM6056931,COSM6056932,COSM6056931,COS…	34	1	large_intestine	5619	3174	29	NS,adrenal_gland,autonomic_ganglia,biliary_tract,bone,breast,central_nervous_system,cervix,endometrium,eye,genital_tract,haematopoietic_and_lymphoid_tissue,kidney,large_intestine,liver,lung,oesophagus,ovary,pancreas,prostate,salivary_gland,skin,small_intestine,soft_tissue,stomach,thymus,thyroid,upper_aerodigestive_tract,urinary_tract		KMT2C,MLL3,KIAA1506,HALR	0.0	HIGH	splice_acceptor_variant	0.0
chr7	151970859	C	T	MAH_R17017908LU01	KMT2C	ENSP00000262189:p.G315S,ENSP00000347325:p.G315S												0	1	REJECT		Somatic	0.007387599907815456	0.007387599907815456	COSM1179668,COSM1179669,COSM1179668,COSM1179669,COSM1179668,COSM1179669,COSM1179668,COSM1179669,COSM1179668,COSM1179669,COSM1179668,COSM1179669,COSM1179668,COSM1179669,COSM1179668,COSM1179669,COSM1179668,COSM1179669,COSM1179668,COSM1179669,COSM1179668,COSM1179669,COSM1179668,COSM1179669,COSM1179668,COSM1179669,COSM1179668,COSM1179669,COSM1179668,COSM1179669,COSM1179668,COSM1179669,COSM1179668,COS…	1040	10	biliary_tract,central_nervous_system,haematopoietic_and_lymphoid_tissue,large_intestine,liver,ovary,prostate,skin,soft...,soft_tissue	5619	3174	29	NS,adrenal_gland,autonomic_ganglia,biliary_tract,bone,breast,central_nervous_system,cervix,endometrium,eye,genital_tract,haematopoietic_and_lymphoid_tissue,kidney,large_intestine,liver,lung,oesophagus,ovary,pancreas,prostate,salivary_gland,skin,small_intestine,soft_tissue,stomach,thymus,thyroid,upper_aerodigestive_tract,urinary_tract	Zinc finger, PHD-type (1);	KMT2C,MLL3,KIAA1506,HALR	0.0	MODERATE	missense_variant	1.0
chr7	151962294	G	A	MAH_R17017910LU01	KMT2C	ENSP00000262189:p.S338L,ENSP00000347325:p.S338L												0	1	REJECT		Somatic	6.692100100735843E-7	6.692100100735843E-7	COSM6056929,COSM6056930,COSM6056929,COSM6056930,COSM6056929,COSM6056930,COSM6056929,COSM6056930,COSM6056929,COSM6056930,COSM6056929,COSM6056930,COSM6056929,COSM6056930,COSM6056929,COSM6056930,COSM6056929,COSM6056930,COSM6056929,COSM6056930,COSM6056929,COSM6056930,COSM6056929,COSM6056930,COSM6056929,COSM6056930,COSM6056929,COSM6056930,COSM6056929,COSM6056930,COSM6056929,COSM6056930,COSM6056929,COS…	36	1	large_intestine	5619	3174	29	NS,adrenal_gland,autonomic_ganglia,biliary_tract,bone,breast,central_nervous_system,cervix,endometrium,eye,genital_tract,haematopoietic_and_lymphoid_tissue,kidney,large_intestine,liver,lung,oesophagus,ovary,pancreas,prostate,salivary_gland,skin,small_intestine,soft_tissue,stomach,thymus,thyroid,upper_aerodigestive_tract,urinary_tract	Zinc finger, RING/FYVE/PHD-type (1);Protein kinase C-like, phorbol ester/diacylglycerol binding (1);Zinc finger, FYVE/PHD-type (1);	KMT2C,MLL3,KIAA1506,HALR	0.0	MODERATE	missense_variant	0.9990000128746033
chr7	151962296	T	C	MAH_R17017910LU01	KMT2C	ENSP00000347325:p.,ENSP00000262189:p.												0	1	REJECT		Somatic	1.195900040329434E-5	1.195900040329434E-5	COSM6056931,COSM6056932,COSM6056931,COSM6056932,COSM6056931,COSM6056932,COSM6056931,COSM6056932,COSM6056931,COSM6056932,COSM6056931,COSM6056932,COSM6056931,COSM6056932,COSM6056931,COSM6056932,COSM6056931,COSM6056932,COSM6056931,COSM6056932,COSM6056931,COSM6056932,COSM6056931,COSM6056932,COSM6056931,COSM6056932,COSM6056931,COSM6056932,COSM6056931,COSM6056932,COSM6056931,COSM6056932,COSM6056931,COS…	34	1	large_intestine	5619	3174	29	NS,adrenal_gland,autonomic_ganglia,biliary_tract,bone,breast,central_nervous_system,cervix,endometrium,eye,genital_tract,haematopoietic_and_lymphoid_tissue,kidney,large_intestine,liver,lung,oesophagus,ovary,pancreas,prostate,salivary_gland,skin,small_intestine,soft_tissue,stomach,thymus,thyroid,upper_aerodigestive_tract,urinary_tract		KMT2C,MLL3,KIAA1506,HALR	0.0	HIGH	splice_acceptor_variant	0.0
chr7	151970859	C	T	MAH_R17017910LU01	KMT2C	ENSP00000262189:p.G315S,ENSP00000347325:p.G315S												0	1	REJECT		Somatic	1.5448999590716994E-7	1.5448999590716994E-7	COSM1179668,COSM1179669,COSM1179668,COSM1179669,COSM1179668,COSM1179669,COSM1179668,COSM1179669,COSM1179668,COSM1179669,COSM1179668,COSM1179669,COSM1179668,COSM1179669,COSM1179668,COSM1179669,COSM1179668,COSM1179669,COSM1179668,COSM1179669,COSM1179668,COSM1179669,COSM1179668,COSM1179669,COSM1179668,COSM1179669,COSM1179668,COSM1179669,COSM1179668,COSM1179669,COSM1179668,COSM1179669,COSM1179668,COS…	1040	10	biliary_tract,central_nervous_system,haematopoietic_and_lymphoid_tissue,large_intestine,liver,ovary,prostate,skin,soft...,soft_tissue	5619	3174	29	NS,adrenal_gland,autonomic_ganglia,biliary_tract,bone,breast,central_nervous_system,cervix,endometrium,eye,genital_tract,haematopoietic_and_lymphoid_tissue,kidney,large_intestine,liver,lung,oesophagus,ovary,pancreas,prostate,salivary_gland,skin,small_intestine,soft_tissue,stomach,thymus,thyroid,upper_aerodigestive_tract,urinary_tract	Zinc finger, PHD-type (1);	KMT2C,MLL3,KIAA1506,HALR	0.0	MODERATE	missense_variant	1.0
chr7	151945060	G	A	MAH_R17017911LU01	KMT2C	ENSP00000347325:p.T820I,ENSP00000262189:p.T820I												0	1	REJECT		Somatic	0.0037422000896185637	0.0037422000896185637	COSM4606481,COSM4606482,COSM4606481,COSM4606482,COSM4606481,COSM4606482,COSM4606481,COSM4606482,COSM4606481,COSM4606482,COSM4606481,COSM4606482,COSM4606481,COSM4606482,COSM4606481,COSM4606482,COSM4606481,COSM4606482,COSM4606481,COSM4606482,COSM4606481,COSM4606482,COSM4606481,COSM4606482,COSM4606481,COSM4606482,COSM4606481,COSM4606482,COSM4606481,COSM4606482,COSM4606481,COSM4606482,COSM4606481,COS…	114	4	haematopoietic_and_lymphoid_tis...,haematopoietic_and_lymphoid_tissue,large_intestine,liver	5619	3174	29	NS,adrenal_gland,autonomic_ganglia,biliary_tract,bone,breast,central_nervous_system,cervix,endometrium,eye,genital_tract,haematopoietic_and_lymphoid_tissue,kidney,large_intestine,liver,lung,oesophagus,ovary,pancreas,prostate,salivary_gland,skin,small_intestine,soft_tissue,stomach,thymus,thyroid,upper_aerodigestive_tract,urinary_tract		KMT2C,MLL3,KIAA1506,HALR	0.009999999776482582	MODERATE	missense_variant	0.9610000252723694
chr7	151962294	G	A	MAH_R17017911LU01	KMT2C	ENSP00000262189:p.S338L,ENSP00000347325:p.S338L												0	1	REJECT		Somatic	0.0037283001001924276	0.0037283001001924276	COSM6056929,COSM6056930,COSM6056929,COSM6056930,COSM6056929,COSM6056930,COSM6056929,COSM6056930,COSM6056929,COSM6056930,COSM6056929,COSM6056930,COSM6056929,COSM6056930,COSM6056929,COSM6056930,COSM6056929,COSM6056930,COSM6056929,COSM6056930,COSM6056929,COSM6056930,COSM6056929,COSM6056930,COSM6056929,COSM6056930,COSM6056929,COSM6056930,COSM6056929,COSM6056930,COSM6056929,COSM6056930,COSM6056929,COS…	36	1	large_intestine	5619	3174	29	NS,adrenal_gland,autonomic_ganglia,biliary_tract,bone,breast,central_nervous_system,cervix,endometrium,eye,genital_tract,haematopoietic_and_lymphoid_tissue,kidney,large_intestine,liver,lung,oesophagus,ovary,pancreas,prostate,salivary_gland,skin,small_intestine,soft_tissue,stomach,thymus,thyroid,upper_aerodigestive_tract,urinary_tract	Zinc finger, RING/FYVE/PHD-type (1);Protein kinase C-like, phorbol ester/diacylglycerol binding (1);Zinc finger, FYVE/PHD-type (1);	KMT2C,MLL3,KIAA1506,HALR	0.0	MODERATE	missense_variant	0.9990000128746033
chr7	151962296	T	C	MAH_R17017911LU01	KMT2C	ENSP00000347325:p.,ENSP00000262189:p.												0	1			Somatic	0.0037146001122891903	0.0037146001122891903	COSM6056931,COSM6056932,COSM6056931,COSM6056932,COSM6056931,COSM6056932,COSM6056931,COSM6056932,COSM6056931,COSM6056932,COSM6056931,COSM6056932,COSM6056931,COSM6056932,COSM6056931,COSM6056932,COSM6056931,COSM6056932,COSM6056931,COSM6056932,COSM6056931,COSM6056932,COSM6056931,COSM6056932,COSM6056931,COSM6056932,COSM6056931,COSM6056932,COSM6056931,COSM6056932,COSM6056931,COSM6056932,COSM6056931,COS…	34	1	large_intestine	5619	3174	29	NS,adrenal_gland,autonomic_ganglia,biliary_tract,bone,breast,central_nervous_system,cervix,endometrium,eye,genital_tract,haematopoietic_and_lymphoid_tissue,kidney,large_intestine,liver,lung,oesophagus,ovary,pancreas,prostate,salivary_gland,skin,small_intestine,soft_tissue,stomach,thymus,thyroid,upper_aerodigestive_tract,urinary_tract		KMT2C,MLL3,KIAA1506,HALR	0.0	HIGH	splice_acceptor_variant	0.0
chr7	151962294	G	A	MAH_R17017913LU01	KMT2C	ENSP00000262189:p.S338L,ENSP00000347325:p.S338L												0	1	REJECT		Somatic	0.0017532999627292156	0.0017532999627292156	COSM6056929,COSM6056930,COSM6056929,COSM6056930,COSM6056929,COSM6056930,COSM6056929,COSM6056930,COSM6056929,COSM6056930,COSM6056929,COSM6056930,COSM6056929,COSM6056930,COSM6056929,COSM6056930,COSM6056929,COSM6056930,COSM6056929,COSM6056930,COSM6056929,COSM6056930,COSM6056929,COSM6056930,COSM6056929,COSM6056930,COSM6056929,COSM6056930,COSM6056929,COSM6056930,COSM6056929,COSM6056930,COSM6056929,COS…	36	1	large_intestine	5619	3174	29	NS,adrenal_gland,autonomic_ganglia,biliary_tract,bone,breast,central_nervous_system,cervix,endometrium,eye,genital_tract,haematopoietic_and_lymphoid_tissue,kidney,large_intestine,liver,lung,oesophagus,ovary,pancreas,prostate,salivary_gland,skin,small_intestine,soft_tissue,stomach,thymus,thyroid,upper_aerodigestive_tract,urinary_tract	Zinc finger, RING/FYVE/PHD-type (1);Protein kinase C-like, phorbol ester/diacylglycerol binding (1);Zinc finger, FYVE/PHD-type (1);	KMT2C,MLL3,KIAA1506,HALR	0.0	MODERATE	missense_variant	0.9990000128746033
chr7	151962296	T	C	MAH_R17017913LU01	KMT2C	ENSP00000347325:p.,ENSP00000262189:p.												0	1	REJECT		Somatic	0.0035673000384122133	0.0035673000384122133	COSM6056931,COSM6056932,COSM6056931,COSM6056932,COSM6056931,COSM6056932,COSM6056931,COSM6056932,COSM6056931,COSM6056932,COSM6056931,COSM6056932,COSM6056931,COSM6056932,COSM6056931,COSM6056932,COSM6056931,COSM6056932,COSM6056931,COSM6056932,COSM6056931,COSM6056932,COSM6056931,COSM6056932,COSM6056931,COSM6056932,COSM6056931,COSM6056932,COSM6056931,COSM6056932,COSM6056931,COSM6056932,COSM6056931,COS…	34	1	large_intestine	5619	3174	29	NS,adrenal_gland,autonomic_ganglia,biliary_tract,bone,breast,central_nervous_system,cervix,endometrium,eye,genital_tract,haematopoietic_and_lymphoid_tissue,kidney,large_intestine,liver,lung,oesophagus,ovary,pancreas,prostate,salivary_gland,skin,small_intestine,soft_tissue,stomach,thymus,thyroid,upper_aerodigestive_tract,urinary_tract		KMT2C,MLL3,KIAA1506,HALR	0.0	HIGH	splice_acceptor_variant	0.0
chr7	151970859	C	T	MAH_R17017913LU01	KMT2C	ENSP00000262189:p.G315S,ENSP00000347325:p.G315S												0	1	REJECT		Somatic	0.0017520999535918236	0.0017520999535918236	COSM1179668,COSM1179669,COSM1179668,COSM1179669,COSM1179668,COSM1179669,COSM1179668,COSM1179669,COSM1179668,COSM1179669,COSM1179668,COSM1179669,COSM1179668,COSM1179669,COSM1179668,COSM1179669,COSM1179668,COSM1179669,COSM1179668,COSM1179669,COSM1179668,COSM1179669,COSM1179668,COSM1179669,COSM1179668,COSM1179669,COSM1179668,COSM1179669,COSM1179668,COSM1179669,COSM1179668,COSM1179669,COSM1179668,COS…	1040	10	biliary_tract,central_nervous_system,haematopoietic_and_lymphoid_tissue,large_intestine,liver,ovary,prostate,skin,soft...,soft_tissue	5619	3174	29	NS,adrenal_gland,autonomic_ganglia,biliary_tract,bone,breast,central_nervous_system,cervix,endometrium,eye,genital_tract,haematopoietic_and_lymphoid_tissue,kidney,large_intestine,liver,lung,oesophagus,ovary,pancreas,prostate,salivary_gland,skin,small_intestine,soft_tissue,stomach,thymus,thyroid,upper_aerodigestive_tract,urinary_tract	Zinc finger, PHD-type (1);	KMT2C,MLL3,KIAA1506,HALR	0.0	MODERATE	missense_variant	1.0
chr7	151970859	C	T	MAH_R17017915LU01	KMT2C	ENSP00000262189:p.G315S,ENSP00000347325:p.G315S												0	1	REJECT		Somatic	0.003710400080308318	0.003710400080308318	COSM1179668,COSM1179669,COSM1179668,COSM1179669,COSM1179668,COSM1179669,COSM1179668,COSM1179669,COSM1179668,COSM1179669,COSM1179668,COSM1179669,COSM1179668,COSM1179669,COSM1179668,COSM1179669,COSM1179668,COSM1179669,COSM1179668,COSM1179669,COSM1179668,COSM1179669,COSM1179668,COSM1179669,COSM1179668,COSM1179669,COSM1179668,COSM1179669,COSM1179668,COSM1179669,COSM1179668,COSM1179669,COSM1179668,COS…	1040	10	biliary_tract,central_nervous_system,haematopoietic_and_lymphoid_tissue,large_intestine,liver,ovary,prostate,skin,soft...,soft_tissue	5619	3174	29	NS,adrenal_gland,autonomic_ganglia,biliary_tract,bone,breast,central_nervous_system,cervix,endometrium,eye,genital_tract,haematopoietic_and_lymphoid_tissue,kidney,large_intestine,liver,lung,oesophagus,ovary,pancreas,prostate,salivary_gland,skin,small_intestine,soft_tissue,stomach,thymus,thyroid,upper_aerodigestive_tract,urinary_tract	Zinc finger, PHD-type (1);	KMT2C,MLL3,KIAA1506,HALR	0.0	MODERATE	missense_variant	1.0
chr7	151962294	G	A	MAH_R17017917LU01	KMT2C	ENSP00000262189:p.S338L,ENSP00000347325:p.S338L												0	1	REJECT		Somatic	2.2277000243775547E-4	2.2277000243775547E-4	COSM6056929,COSM6056930,COSM6056929,COSM6056930,COSM6056929,COSM6056930,COSM6056929,COSM6056930,COSM6056929,COSM6056930,COSM6056929,COSM6056930,COSM6056929,COSM6056930,COSM6056929,COSM6056930,COSM6056929,COSM6056930,COSM6056929,COSM6056930,COSM6056929,COSM6056930,COSM6056929,COSM6056930,COSM6056929,COSM6056930,COSM6056929,COSM6056930,COSM6056929,COSM6056930,COSM6056929,COSM6056930,COSM6056929,COS…	36	1	large_intestine	5619	3174	29	NS,adrenal_gland,autonomic_ganglia,biliary_tract,bone,breast,central_nervous_system,cervix,endometrium,eye,genital_tract,haematopoietic_and_lymphoid_tissue,kidney,large_intestine,liver,lung,oesophagus,ovary,pancreas,prostate,salivary_gland,skin,small_intestine,soft_tissue,stomach,thymus,thyroid,upper_aerodigestive_tract,urinary_tract	Zinc finger, RING/FYVE/PHD-type (1);Protein kinase C-like, phorbol ester/diacylglycerol binding (1);Zinc finger, FYVE/PHD-type (1);	KMT2C,MLL3,KIAA1506,HALR	0.0	MODERATE	missense_variant	0.9990000128746033
chr7	151962296	T	C	MAH_R17017917LU01	KMT2C	ENSP00000347325:p.,ENSP00000262189:p.												0	1	REJECT		Somatic	4.5031000627204776E-4	4.5031000627204776E-4	COSM6056931,COSM6056932,COSM6056931,COSM6056932,COSM6056931,COSM6056932,COSM6056931,COSM6056932,COSM6056931,COSM6056932,COSM6056931,COSM6056932,COSM6056931,COSM6056932,COSM6056931,COSM6056932,COSM6056931,COSM6056932,COSM6056931,COSM6056932,COSM6056931,COSM6056932,COSM6056931,COSM6056932,COSM6056931,COSM6056932,COSM6056931,COSM6056932,COSM6056931,COSM6056932,COSM6056931,COSM6056932,COSM6056931,COS…	34	1	large_intestine	5619	3174	29	NS,adrenal_gland,autonomic_ganglia,biliary_tract,bone,breast,central_nervous_system,cervix,endometrium,eye,genital_tract,haematopoietic_and_lymphoid_tissue,kidney,large_intestine,liver,lung,oesophagus,ovary,pancreas,prostate,salivary_gland,skin,small_intestine,soft_tissue,stomach,thymus,thyroid,upper_aerodigestive_tract,urinary_tract		KMT2C,MLL3,KIAA1506,HALR	0.0	HIGH	splice_acceptor_variant	0.0
chr7	151970795	T	C	MAH_R17017917LU01	KMT2C	ENSP00000262189:p.E336G,ENSP00000347325:p.E336G												1	1	KEEP		Somatic	4.2773998575285077E-4	4.2773998575285077E-4	COSM5482468,COSM5482469	2	1	large_intestine	5619	3174	29	NS,adrenal_gland,autonomic_ganglia,biliary_tract,bone,breast,central_nervous_system,cervix,endometrium,eye,genital_tract,haematopoietic_and_lymphoid_tissue,kidney,large_intestine,liver,lung,oesophagus,ovary,pancreas,prostate,salivary_gland,skin,small_intestine,soft_tissue,stomach,thymus,thyroid,upper_aerodigestive_tract,urinary_tract	Zinc finger, RING/FYVE/PHD-type (1);Protein kinase C-like, phorbol ester/diacylglycerol binding (1);Zinc finger, FYVE/PHD-type (1);	KMT2C,MLL3,KIAA1506,HALR	0.0	MODERATE	missense_variant	0.7910000085830688
chr7	151970859	C	T	MAH_R17017917LU01	KMT2C	ENSP00000262189:p.G315S,ENSP00000347325:p.G315S												0	1	REJECT		Somatic	4.393999988678843E-4	4.393999988678843E-4	COSM1179668,COSM1179669,COSM1179668,COSM1179669,COSM1179668,COSM1179669,COSM1179668,COSM1179669,COSM1179668,COSM1179669,COSM1179668,COSM1179669,COSM1179668,COSM1179669,COSM1179668,COSM1179669,COSM1179668,COSM1179669,COSM1179668,COSM1179669,COSM1179668,COSM1179669,COSM1179668,COSM1179669,COSM1179668,COSM1179669,COSM1179668,COSM1179669,COSM1179668,COSM1179669,COSM1179668,COSM1179669,COSM1179668,COS…	1040	10	biliary_tract,central_nervous_system,haematopoietic_and_lymphoid_tissue,large_intestine,liver,ovary,prostate,skin,soft...,soft_tissue	5619	3174	29	NS,adrenal_gland,autonomic_ganglia,biliary_tract,bone,breast,central_nervous_system,cervix,endometrium,eye,genital_tract,haematopoietic_and_lymphoid_tissue,kidney,large_intestine,liver,lung,oesophagus,ovary,pancreas,prostate,salivary_gland,skin,small_intestine,soft_tissue,stomach,thymus,thyroid,upper_aerodigestive_tract,urinary_tract	Zinc finger, PHD-type (1);	KMT2C,MLL3,KIAA1506,HALR	0.0	MODERATE	missense_variant	1.0
chr7	151842355	T	C	MAH_R17017919LU01	KMT2C	ENSP00000347325:p.N4743S,ENSP00000262189:p.N4686S												1	1	KEEP		Somatic	6.061799922463251E-6	6.061799922463251E-6		null	null		5619	3174	29	NS,adrenal_gland,autonomic_ganglia,biliary_tract,bone,breast,central_nervous_system,cervix,endometrium,eye,genital_tract,haematopoietic_and_lymphoid_tissue,kidney,large_intestine,liver,lung,oesophagus,ovary,pancreas,prostate,salivary_gland,skin,small_intestine,soft_tissue,stomach,thymus,thyroid,upper_aerodigestive_tract,urinary_tract	FY-rich, C-terminal (1);FY-rich, C-terminal subgroup (1);	KMT2C,MLL3,KIAA1506,HALR	0.009864360094070435	MODERATE	missense_variant	0.9390000104904175
chr7	151962153	C	A	MAH_R17017919LU01	KMT2C	ENSP00000262189:p.C385F,ENSP00000347325:p.C385F												0	1	REJECT		Somatic	4.4160999823361635E-4	4.4160999823361635E-4		null	null		5619	3174	29	NS,adrenal_gland,autonomic_ganglia,biliary_tract,bone,breast,central_nervous_system,cervix,endometrium,eye,genital_tract,haematopoietic_and_lymphoid_tissue,kidney,large_intestine,liver,lung,oesophagus,ovary,pancreas,prostate,salivary_gland,skin,small_intestine,soft_tissue,stomach,thymus,thyroid,upper_aerodigestive_tract,urinary_tract	Zinc finger, PHD-finger (1);Zinc finger, RING/FYVE/PHD-type (1);Zinc finger, RING-type (2);Zinc finger, PHD-type (1);Protein kinase C-like, phorbol ester/diacylglycerol binding (1);Zinc finger, FYVE/PHD-type (1);	KMT2C,MLL3,KIAA1506,HALR	0.0	MODERATE	missense_variant	0.9980000257492065
chr7	151945060	G	A	MAH_R17017920LU01	KMT2C	ENSP00000347325:p.T820I,ENSP00000262189:p.T820I												0	1	REJECT		Somatic	2.2353000531438738E-4	2.2353000531438738E-4	COSM4606481,COSM4606482,COSM4606481,COSM4606482,COSM4606481,COSM4606482,COSM4606481,COSM4606482,COSM4606481,COSM4606482,COSM4606481,COSM4606482,COSM4606481,COSM4606482,COSM4606481,COSM4606482,COSM4606481,COSM4606482,COSM4606481,COSM4606482,COSM4606481,COSM4606482,COSM4606481,COSM4606482,COSM4606481,COSM4606482,COSM4606481,COSM4606482,COSM4606481,COSM4606482,COSM4606481,COSM4606482,COSM4606481,COS…	114	4	haematopoietic_and_lymphoid_tis...,haematopoietic_and_lymphoid_tissue,large_intestine,liver	5619	3174	29	NS,adrenal_gland,autonomic_ganglia,biliary_tract,bone,breast,central_nervous_system,cervix,endometrium,eye,genital_tract,haematopoietic_and_lymphoid_tissue,kidney,large_intestine,liver,lung,oesophagus,ovary,pancreas,prostate,salivary_gland,skin,small_intestine,soft_tissue,stomach,thymus,thyroid,upper_aerodigestive_tract,urinary_tract		KMT2C,MLL3,KIAA1506,HALR	0.009999999776482582	MODERATE	missense_variant	0.9610000252723694
chr7	151962294	G	A	MAH_R17017920LU01	KMT2C	ENSP00000262189:p.S338L,ENSP00000347325:p.S338L												0	1	REJECT		Somatic	5.239899837761186E-5	5.239899837761186E-5	COSM6056929,COSM6056930,COSM6056929,COSM6056930,COSM6056929,COSM6056930,COSM6056929,COSM6056930,COSM6056929,COSM6056930,COSM6056929,COSM6056930,COSM6056929,COSM6056930,COSM6056929,COSM6056930,COSM6056929,COSM6056930,COSM6056929,COSM6056930,COSM6056929,COSM6056930,COSM6056929,COSM6056930,COSM6056929,COSM6056930,COSM6056929,COSM6056930,COSM6056929,COSM6056930,COSM6056929,COSM6056930,COSM6056929,COS…	36	1	large_intestine	5619	3174	29	NS,adrenal_gland,autonomic_ganglia,biliary_tract,bone,breast,central_nervous_system,cervix,endometrium,eye,genital_tract,haematopoietic_and_lymphoid_tissue,kidney,large_intestine,liver,lung,oesophagus,ovary,pancreas,prostate,salivary_gland,skin,small_intestine,soft_tissue,stomach,thymus,thyroid,upper_aerodigestive_tract,urinary_tract	Zinc finger, RING/FYVE/PHD-type (1);Protein kinase C-like, phorbol ester/diacylglycerol binding (1);Zinc finger, FYVE/PHD-type (1);	KMT2C,MLL3,KIAA1506,HALR	0.0	MODERATE	missense_variant	0.9990000128746033
chr7	151962296	T	C	MAH_R17017920LU01	KMT2C	ENSP00000347325:p.,ENSP00000262189:p.												0	1			Somatic	5.138000051374547E-5	5.138000051374547E-5	COSM6056931,COSM6056932,COSM6056931,COSM6056932,COSM6056931,COSM6056932,COSM6056931,COSM6056932,COSM6056931,COSM6056932,COSM6056931,COSM6056932,COSM6056931,COSM6056932,COSM6056931,COSM6056932,COSM6056931,COSM6056932,COSM6056931,COSM6056932,COSM6056931,COSM6056932,COSM6056931,COSM6056932,COSM6056931,COSM6056932,COSM6056931,COSM6056932,COSM6056931,COSM6056932,COSM6056931,COSM6056932,COSM6056931,COS…	34	1	large_intestine	5619	3174	29	NS,adrenal_gland,autonomic_ganglia,biliary_tract,bone,breast,central_nervous_system,cervix,endometrium,eye,genital_tract,haematopoietic_and_lymphoid_tissue,kidney,large_intestine,liver,lung,oesophagus,ovary,pancreas,prostate,salivary_gland,skin,small_intestine,soft_tissue,stomach,thymus,thyroid,upper_aerodigestive_tract,urinary_tract		KMT2C,MLL3,KIAA1506,HALR	0.0	HIGH	splice_acceptor_variant	0.0
chr7	151970859	C	T	MAH_R17017920LU01	KMT2C	ENSP00000262189:p.G315S,ENSP00000347325:p.G315S												0	1	REJECT		Somatic	4.357800062280148E-4	4.357800062280148E-4	COSM1179668,COSM1179669,COSM1179668,COSM1179669,COSM1179668,COSM1179669,COSM1179668,COSM1179669,COSM1179668,COSM1179669,COSM1179668,COSM1179669,COSM1179668,COSM1179669,COSM1179668,COSM1179669,COSM1179668,COSM1179669,COSM1179668,COSM1179669,COSM1179668,COSM1179669,COSM1179668,COSM1179669,COSM1179668,COSM1179669,COSM1179668,COSM1179669,COSM1179668,COSM1179669,COSM1179668,COSM1179669,COSM1179668,COS…	1040	10	biliary_tract,central_nervous_system,haematopoietic_and_lymphoid_tissue,large_intestine,liver,ovary,prostate,skin,soft...,soft_tissue	5619	3174	29	NS,adrenal_gland,autonomic_ganglia,biliary_tract,bone,breast,central_nervous_system,cervix,endometrium,eye,genital_tract,haematopoietic_and_lymphoid_tissue,kidney,large_intestine,liver,lung,oesophagus,ovary,pancreas,prostate,salivary_gland,skin,small_intestine,soft_tissue,stomach,thymus,thyroid,upper_aerodigestive_tract,urinary_tract	Zinc finger, PHD-type (1);	KMT2C,MLL3,KIAA1506,HALR	0.0	MODERATE	missense_variant	1.0

## Sheet: SYNE1
Chrom	Pos	Reference	Call	PN	Gene_symbol	COSMIC_HGVSp	Drug_Gene	Drug_Gene_ApprovalStatus	Drug_Pathway	Drug_Pathway_ApprovalStatus	Drug_SourcePathway	Drug_Mechanism_of_Action	Gene_ActionableDrugClasses	Gene_ActionablePathways	Gene_ActionableTumors	ResistancexSensitivity_Variants	Gene_ActionableMutations	caller_both	caller_either	mutect_judgement	mutect_failure_reasons	varscan2_somatic_status	varscan2_somatic_p_value	varscan2_variant_p_value	COSMIC_IDs	COSMIC_count_vars	COSMIC_pscount	COSMIC_primarysites	COSMIC_count_varsInGene	COSMIC_count_lociInGene	COSMIC_count_primarysitesInGene	COSMIC_primarysitesInGene	dbNSFP_Interpro_domain	GENE_Aliases	VEP_Max_Af	VEP_Max_Impact	VEP_max_consequence	VEP_max_score
chr6	152737945	C	T	MAH_BTN-004	SYNE1	ENSP00000396024:p.S1883N,ENSP00000390975:p.S1883N,ENSP00000341887:p.S1913N,ENSP00000265368:p.S1876N												1	1	KEEP		Somatic	6.0618e-06	6.0618e-06		null	null		14394	11968	32	NS,adrenal_gland,autonomic_ganglia,biliary_tract,bone,breast,central_nervous_system,cervix,endometrium,genital_tract,haematopoietic_and_lymphoid_tissue,kidney,large_intestine,liver,lung,meninges,oesophagus,ovary,pancreas,parathyroid,peritoneum,pituitary,pleura,prostate,salivary_gland,skin,small_intestine,soft_tissue,stomach,thyroid,upper_aerodigestive_tract,urinary_tract		ARCA1,C6orf98,CPG2,KIAA0796,MYNE1,Nesp1,Nesprin-1,SCAR8,SYNE-1B,SYNE1,dJ45H2.2,enaptin,8B	0	MODERATE	missense_variant	0.138
chr6	152688258	G	A	MAH_BTN-005	SYNE1	ENSP00000396024:p.,ENSP00000341887:p.,ENSP00000265368:p.,ENSP00000390975:p.												1	1	KEEP		Somatic	3.974e-37	3.974e-37		null	null		14394	11968	32	NS,adrenal_gland,autonomic_ganglia,biliary_tract,bone,breast,central_nervous_system,cervix,endometrium,genital_tract,haematopoietic_and_lymphoid_tissue,kidney,large_intestine,liver,lung,meninges,oesophagus,ovary,pancreas,parathyroid,peritoneum,pituitary,pleura,prostate,salivary_gland,skin,small_intestine,soft_tissue,stomach,thyroid,upper_aerodigestive_tract,urinary_tract		ARCA1,C6orf98,CPG2,KIAA0796,MYNE1,Nesp1,Nesprin-1,SCAR8,SYNE-1B,SYNE1,dJ45H2.2,enaptin,8B	0	MODERATE	missense_variant	0
chr6	152763241	C	T	MAH_BTN-006	SYNE1	ENSP00000396024:p.R1333H,ENSP00000390975:p.R1333H,ENSP00000265368:p.R1326H,ENSP00000341887:p.R1392H												1	1	KEEP		Somatic	0.0015455	0.0015455	COSM3021166,COSM3021167,COSM3021168,COSM4351850,COSM4351851,COSM3021166,COSM3021167,COSM3021168,COSM4351850,COSM4351851	10	1	stomach	14394	11968	32	NS,adrenal_gland,autonomic_ganglia,biliary_tract,bone,breast,central_nervous_system,cervix,endometrium,genital_tract,haematopoietic_and_lymphoid_tissue,kidney,large_intestine,liver,lung,meninges,oesophagus,ovary,pancreas,parathyroid,peritoneum,pituitary,pleura,prostate,salivary_gland,skin,small_intestine,soft_tissue,stomach,thyroid,upper_aerodigestive_tract,urinary_tract		ARCA1,C6orf98,CPG2,KIAA0796,MYNE1,Nesp1,Nesprin-1,SCAR8,SYNE-1B,SYNE1,dJ45H2.2,enaptin,8B	0.00666667	MODERATE	missense_variant	0.004
chr6	152697631	C	T	MAH_BTN-015	SYNE1	ENSP00000396024:p.R3077Q,ENSP00000390975:p.R3077Q,ENSP00000265368:p.R3070Q,ENSP00000341887:p.R3109Q												1	1	KEEP		Somatic	3.2167e-09	3.2167e-09	COSM1074968,COSM1074969,COSM1154595,COSM4785503,COSM4785504	7	2	endometrium,large_intestine	14394	11968	32	NS,adrenal_gland,autonomic_ganglia,biliary_tract,bone,breast,central_nervous_system,cervix,endometrium,genital_tract,haematopoietic_and_lymphoid_tissue,kidney,large_intestine,liver,lung,meninges,oesophagus,ovary,pancreas,parathyroid,peritoneum,pituitary,pleura,prostate,salivary_gland,skin,small_intestine,soft_tissue,stomach,thyroid,upper_aerodigestive_tract,urinary_tract		ARCA1,C6orf98,CPG2,KIAA0796,MYNE1,Nesp1,Nesprin-1,SCAR8,SYNE-1B,SYNE1,dJ45H2.2,enaptin,8B	0.000172861	MODERATE	missense_variant	0.406
chr6	152476025	A	G	MAH_BTN-016	SYNE1	ENSP00000341887:p.,ENSP00000396024:p.,ENSP00000265368:p.,ENSP00000390975:p.												1	1	KEEP		Somatic	2.9161e-06	2.9161e-06		null	null		14394	11968	32	NS,adrenal_gland,autonomic_ganglia,biliary_tract,bone,breast,central_nervous_system,cervix,endometrium,genital_tract,haematopoietic_and_lymphoid_tissue,kidney,large_intestine,liver,lung,meninges,oesophagus,ovary,pancreas,parathyroid,peritoneum,pituitary,pleura,prostate,salivary_gland,skin,small_intestine,soft_tissue,stomach,thyroid,upper_aerodigestive_tract,urinary_tract		ARCA1,C6orf98,CPG2,KIAA0796,MYNE1,Nesp1,Nesprin-1,SCAR8,SYNE-1B,SYNE1,dJ45H2.2,enaptin,8B	0.001	HIGH	splice_donor_variant	0
chr6	152841622	G	A	MAH_BTN-019	SYNE1	ENSP00000390975:p.T94M,ENSP00000341887:p.T94M,ENSP00000265368:p.T94M,ENSP00000396024:p.T94M												1	1	KEEP		Somatic	1.5685e-14	1.5685e-14	COSM3859745,COSM3859746,COSM3859747,COSM3859748,COSM3859749	5	1	stomach	14394	11968	32	NS,adrenal_gland,autonomic_ganglia,biliary_tract,bone,breast,central_nervous_system,cervix,endometrium,genital_tract,haematopoietic_and_lymphoid_tissue,kidney,large_intestine,liver,lung,meninges,oesophagus,ovary,pancreas,parathyroid,peritoneum,pituitary,pleura,prostate,salivary_gland,skin,small_intestine,soft_tissue,stomach,thyroid,upper_aerodigestive_tract,urinary_tract	Calponin homology domain (5);	ARCA1,C6orf98,CPG2,KIAA0796,MYNE1,Nesp1,Nesprin-1,SCAR8,SYNE-1B,SYNE1,dJ45H2.2,enaptin,8B	0.00061082	MODERATE	missense_variant	1
chr6	152621829	G	C	MAH_BTN-025	SYNE1	ENSP00000396024:p.P5806A,ENSP00000265368:p.P5877A,ENSP00000390975:p.P5806A,ENSP00000341887:p.P5489A												1	1	KEEP		Somatic	2.627e-07	2.627e-07		null	null		14394	11968	32	NS,adrenal_gland,autonomic_ganglia,biliary_tract,bone,breast,central_nervous_system,cervix,endometrium,genital_tract,haematopoietic_and_lymphoid_tissue,kidney,large_intestine,liver,lung,meninges,oesophagus,ovary,pancreas,parathyroid,peritoneum,pituitary,pleura,prostate,salivary_gland,skin,small_intestine,soft_tissue,stomach,thyroid,upper_aerodigestive_tract,urinary_tract		ARCA1,C6orf98,CPG2,KIAA0796,MYNE1,Nesp1,Nesprin-1,SCAR8,SYNE-1B,SYNE1,dJ45H2.2,enaptin,8B	0.001	MODERATE	missense_variant	0.99
chr6	152655269	C	T	MAH_BTN-025	SYNE1	ENSP00000390975:p.R4152H,ENSP00000341887:p.R4088H,ENSP00000265368:p.R4223H,ENSP00000396024:p.R4152H												1	1	KEEP		Somatic	3.2555e-29	3.2555e-29	COSM1441445,COSM1441446,COSM32658,COSM3430205,COSM3430206	18	2	central_nervous_system,large_intestine	14394	11968	32	NS,adrenal_gland,autonomic_ganglia,biliary_tract,bone,breast,central_nervous_system,cervix,endometrium,genital_tract,haematopoietic_and_lymphoid_tissue,kidney,large_intestine,liver,lung,meninges,oesophagus,ovary,pancreas,parathyroid,peritoneum,pituitary,pleura,prostate,salivary_gland,skin,small_intestine,soft_tissue,stomach,thyroid,upper_aerodigestive_tract,urinary_tract		ARCA1,C6orf98,CPG2,KIAA0796,MYNE1,Nesp1,Nesprin-1,SCAR8,SYNE-1B,SYNE1,dJ45H2.2,enaptin,8B	0.00411523	MODERATE	missense_variant	0.001
chr6	152738069	G	C	MAH_BTN-028	SYNE1	ENSP00000341887:p.R1872G,ENSP00000396024:p.R1842G,ENSP00000390975:p.R1842G,ENSP00000265368:p.R1835G												1	1	KEEP		Somatic	0.0029874	0.0029874		null	null		14394	11968	32	NS,adrenal_gland,autonomic_ganglia,biliary_tract,bone,breast,central_nervous_system,cervix,endometrium,genital_tract,haematopoietic_and_lymphoid_tissue,kidney,large_intestine,liver,lung,meninges,oesophagus,ovary,pancreas,parathyroid,peritoneum,pituitary,pleura,prostate,salivary_gland,skin,small_intestine,soft_tissue,stomach,thyroid,upper_aerodigestive_tract,urinary_tract		ARCA1,C6orf98,CPG2,KIAA0796,MYNE1,Nesp1,Nesprin-1,SCAR8,SYNE-1B,SYNE1,dJ45H2.2,enaptin,8B	0	MODERATE	missense_variant	0.2
chr6	152623126	T	C	MAH_BTN-031	SYNE1	ENSP00000265368:p.M5807V,ENSP00000396024:p.M5736V,ENSP00000390975:p.M5736V,ENSP00000341887:p.M5419V												1	1	KEEP		Somatic	7.4301e-20	7.4301e-20		null	null		14394	11968	32	NS,adrenal_gland,autonomic_ganglia,biliary_tract,bone,breast,central_nervous_system,cervix,endometrium,genital_tract,haematopoietic_and_lymphoid_tissue,kidney,large_intestine,liver,lung,meninges,oesophagus,ovary,pancreas,parathyroid,peritoneum,pituitary,pleura,prostate,salivary_gland,skin,small_intestine,soft_tissue,stomach,thyroid,upper_aerodigestive_tract,urinary_tract		ARCA1,C6orf98,CPG2,KIAA0796,MYNE1,Nesp1,Nesprin-1,SCAR8,SYNE-1B,SYNE1,dJ45H2.2,enaptin,8B	0.000242248	MODERATE	missense_variant	0.108
chr6	152646407	C	T	MAH_BTN-035	SYNE1	ENSP00000390975:p.E5086K,ENSP00000341887:p.E4850K,ENSP00000265368:p.E5157K,ENSP00000396024:p.E5086K												1	1	KEEP		Somatic	1.7375e-10	1.7375e-10		null	null		14394	11968	32	NS,adrenal_gland,autonomic_ganglia,biliary_tract,bone,breast,central_nervous_system,cervix,endometrium,genital_tract,haematopoietic_and_lymphoid_tissue,kidney,large_intestine,liver,lung,meninges,oesophagus,ovary,pancreas,parathyroid,peritoneum,pituitary,pleura,prostate,salivary_gland,skin,small_intestine,soft_tissue,stomach,thyroid,upper_aerodigestive_tract,urinary_tract		ARCA1,C6orf98,CPG2,KIAA0796,MYNE1,Nesp1,Nesprin-1,SCAR8,SYNE-1B,SYNE1,dJ45H2.2,enaptin,8B	0.00462321	MODERATE	missense_variant	0.554
chr6	152462353	C	T	MAH_BTN-039	SYNE1	ENSP00000396024:p.E8363K,ENSP00000390975:p.E8363K,ENSP00000341887:p.E8023K,ENSP00000265368:p.E8411K												1	1	KEEP		Somatic	6.1809e-05	6.1809e-05		null	null		14394	11968	32	NS,adrenal_gland,autonomic_ganglia,biliary_tract,bone,breast,central_nervous_system,cervix,endometrium,genital_tract,haematopoietic_and_lymphoid_tissue,kidney,large_intestine,liver,lung,meninges,oesophagus,ovary,pancreas,parathyroid,peritoneum,pituitary,pleura,prostate,salivary_gland,skin,small_intestine,soft_tissue,stomach,thyroid,upper_aerodigestive_tract,urinary_tract		ARCA1,C6orf98,CPG2,KIAA0796,MYNE1,Nesp1,Nesprin-1,SCAR8,SYNE-1B,SYNE1,dJ45H2.2,enaptin,8B	6.0562e-05	MODERATE	missense_variant	1
chr6	152652580	C	A	MAH_BTN-049	SYNE1	ENSP00000396024:p.D4343Y,ENSP00000390975:p.D4343Y,ENSP00000341887:p.D4279Y,ENSP00000265368:p.D4414Y												1	1	KEEP		Somatic	2.9186e-09	2.9186e-09		null	null		14394	11968	32	NS,adrenal_gland,autonomic_ganglia,biliary_tract,bone,breast,central_nervous_system,cervix,endometrium,genital_tract,haematopoietic_and_lymphoid_tissue,kidney,large_intestine,liver,lung,meninges,oesophagus,ovary,pancreas,parathyroid,peritoneum,pituitary,pleura,prostate,salivary_gland,skin,small_intestine,soft_tissue,stomach,thyroid,upper_aerodigestive_tract,urinary_tract		ARCA1,C6orf98,CPG2,KIAA0796,MYNE1,Nesp1,Nesprin-1,SCAR8,SYNE-1B,SYNE1,dJ45H2.2,enaptin,8B	0.000231214	MODERATE	missense_variant	0.865
chr6	152675994	G	A	MAH_BTN-050	SYNE1	ENSP00000390975:p.R3583W,ENSP00000265368:p.R3576W,ENSP00000396024:p.R3583W,ENSP00000341887:p.R3547W												0	1	KEEP			null	null		null	null		14394	11968	32	NS,adrenal_gland,autonomic_ganglia,biliary_tract,bone,breast,central_nervous_system,cervix,endometrium,genital_tract,haematopoietic_and_lymphoid_tissue,kidney,large_intestine,liver,lung,meninges,oesophagus,ovary,pancreas,parathyroid,peritoneum,pituitary,pleura,prostate,salivary_gland,skin,small_intestine,soft_tissue,stomach,thyroid,upper_aerodigestive_tract,urinary_tract		ARCA1,C6orf98,CPG2,KIAA0796,MYNE1,Nesp1,Nesprin-1,SCAR8,SYNE-1B,SYNE1,dJ45H2.2,enaptin,8B	9.60984e-05	MODERATE	missense_variant	1
chr6	152716744	G	A	MAH_BTN-051	SYNE1	ENSP00000265368:p.T2540M,ENSP00000396024:p.T2547M,ENSP00000390975:p.T2547M,ENSP00000341887:p.T2579M												1	1	KEEP		Somatic	2.2975e-07	2.2975e-07	COSM3020858,COSM3020859,COSM3020860,COSM4351614,COSM4351615	10	1	large_intestine	14394	11968	32	NS,adrenal_gland,autonomic_ganglia,biliary_tract,bone,breast,central_nervous_system,cervix,endometrium,genital_tract,haematopoietic_and_lymphoid_tissue,kidney,large_intestine,liver,lung,meninges,oesophagus,ovary,pancreas,parathyroid,peritoneum,pituitary,pleura,prostate,salivary_gland,skin,small_intestine,soft_tissue,stomach,thyroid,upper_aerodigestive_tract,urinary_tract		ARCA1,C6orf98,CPG2,KIAA0796,MYNE1,Nesp1,Nesprin-1,SCAR8,SYNE-1B,SYNE1,dJ45H2.2,enaptin,8B	0.001	MODERATE	missense_variant	1
chr6	152720753	C	T	MAH_BTN-053	SYNE1	ENSP00000265368:p.S2412N,ENSP00000341887:p.S2449N,ENSP00000396024:p.S2419N,ENSP00000390975:p.S2419N												0	1	KEEP			null	null		null	null		14394	11968	32	NS,adrenal_gland,autonomic_ganglia,biliary_tract,bone,breast,central_nervous_system,cervix,endometrium,genital_tract,haematopoietic_and_lymphoid_tissue,kidney,large_intestine,liver,lung,meninges,oesophagus,ovary,pancreas,parathyroid,peritoneum,pituitary,pleura,prostate,salivary_gland,skin,small_intestine,soft_tissue,stomach,thyroid,upper_aerodigestive_tract,urinary_tract		ARCA1,C6orf98,CPG2,KIAA0796,MYNE1,Nesp1,Nesprin-1,SCAR8,SYNE-1B,SYNE1,dJ45H2.2,enaptin,8B	0	MODERATE	missense_variant	0
chr6	152469219	C	T	MAH_BTN-058	SYNE1	ENSP00000390975:p.D8242N,ENSP00000396024:p.D8242N,ENSP00000265368:p.D8313N,ENSP00000341887:p.D7925N												1	1	KEEP		Somatic	0.0028249	0.0028249		null	null		14394	11968	32	NS,adrenal_gland,autonomic_ganglia,biliary_tract,bone,breast,central_nervous_system,cervix,endometrium,genital_tract,haematopoietic_and_lymphoid_tissue,kidney,large_intestine,liver,lung,meninges,oesophagus,ovary,pancreas,parathyroid,peritoneum,pituitary,pleura,prostate,salivary_gland,skin,small_intestine,soft_tissue,stomach,thyroid,upper_aerodigestive_tract,urinary_tract		ARCA1,C6orf98,CPG2,KIAA0796,MYNE1,Nesp1,Nesprin-1,SCAR8,SYNE-1B,SYNE1,dJ45H2.2,enaptin,8B	0	MODERATE	missense_variant	0.209
chr6	152711504	G	T	MAH_BTN-058	SYNE1	ENSP00000396024:p.N2703K,ENSP00000390975:p.N2703K,ENSP00000265368:p.N2696K,ENSP00000341887:p.N2735K												0	1	KEEP			null	null		null	null		14394	11968	32	NS,adrenal_gland,autonomic_ganglia,biliary_tract,bone,breast,central_nervous_system,cervix,endometrium,genital_tract,haematopoietic_and_lymphoid_tissue,kidney,large_intestine,liver,lung,meninges,oesophagus,ovary,pancreas,parathyroid,peritoneum,pituitary,pleura,prostate,salivary_gland,skin,small_intestine,soft_tissue,stomach,thyroid,upper_aerodigestive_tract,urinary_tract		ARCA1,C6orf98,CPG2,KIAA0796,MYNE1,Nesp1,Nesprin-1,SCAR8,SYNE-1B,SYNE1,dJ45H2.2,enaptin,8B	0	MODERATE	missense_variant	0.452
chr6	152805995	T	C	MAH_BTN-058	SYNE1	ENSP00000341887:p.Q387R,ENSP00000390975:p.Q394R,ENSP00000265368:p.Q387R,ENSP00000396024:p.Q394R												1	1	KEEP		Somatic	6.911e-06	6.911e-06		null	null		14394	11968	32	NS,adrenal_gland,autonomic_ganglia,biliary_tract,bone,breast,central_nervous_system,cervix,endometrium,genital_tract,haematopoietic_and_lymphoid_tissue,kidney,large_intestine,liver,lung,meninges,oesophagus,ovary,pancreas,parathyroid,peritoneum,pituitary,pleura,prostate,salivary_gland,skin,small_intestine,soft_tissue,stomach,thyroid,upper_aerodigestive_tract,urinary_tract		ARCA1,C6orf98,CPG2,KIAA0796,MYNE1,Nesp1,Nesprin-1,SCAR8,SYNE-1B,SYNE1,dJ45H2.2,enaptin,8B	0	MODERATE	missense_variant	1
chr6	152555026	G	A	MAH_BTN-060	SYNE1	ENSP00000390975:p.R6797*,ENSP00000341887:p.R6480*,ENSP00000265368:p.R6868*,ENSP00000396024:p.R6797*												0	1	KEEP			null	null		null	null		14394	11968	32	NS,adrenal_gland,autonomic_ganglia,biliary_tract,bone,breast,central_nervous_system,cervix,endometrium,genital_tract,haematopoietic_and_lymphoid_tissue,kidney,large_intestine,liver,lung,meninges,oesophagus,ovary,pancreas,parathyroid,peritoneum,pituitary,pleura,prostate,salivary_gland,skin,small_intestine,soft_tissue,stomach,thyroid,upper_aerodigestive_tract,urinary_tract		ARCA1,C6orf98,CPG2,KIAA0796,MYNE1,Nesp1,Nesprin-1,SCAR8,SYNE-1B,SYNE1,dJ45H2.2,enaptin,8B	8.64753e-05	HIGH	stop_gained	0
chr6	152671455	G	C	MAH_BTN-060	SYNE1	ENSP00000390975:p.,ENSP00000341887:p.L3841V,ENSP00000396024:p.,ENSP00000265368:p.L3917V												1	1	KEEP		Somatic	1.1337e-06	1.1337e-06		null	null		14394	11968	32	NS,adrenal_gland,autonomic_ganglia,biliary_tract,bone,breast,central_nervous_system,cervix,endometrium,genital_tract,haematopoietic_and_lymphoid_tissue,kidney,large_intestine,liver,lung,meninges,oesophagus,ovary,pancreas,parathyroid,peritoneum,pituitary,pleura,prostate,salivary_gland,skin,small_intestine,soft_tissue,stomach,thyroid,upper_aerodigestive_tract,urinary_tract		ARCA1,C6orf98,CPG2,KIAA0796,MYNE1,Nesp1,Nesprin-1,SCAR8,SYNE-1B,SYNE1,dJ45H2.2,enaptin,8B	0	MODERATE	missense_variant	0.999
chr6	152792881	T	C	MAH_BTN-065	SYNE1	ENSP00000265368:p.T495A,ENSP00000390975:p.T502A,ENSP00000341887:p.T502A,ENSP00000396024:p.T502A												0	1	KEEP			null	null		null	null		14394	11968	32	NS,adrenal_gland,autonomic_ganglia,biliary_tract,bone,breast,central_nervous_system,cervix,endometrium,genital_tract,haematopoietic_and_lymphoid_tissue,kidney,large_intestine,liver,lung,meninges,oesophagus,ovary,pancreas,parathyroid,peritoneum,pituitary,pleura,prostate,salivary_gland,skin,small_intestine,soft_tissue,stomach,thyroid,upper_aerodigestive_tract,urinary_tract		ARCA1,C6orf98,CPG2,KIAA0796,MYNE1,Nesp1,Nesprin-1,SCAR8,SYNE-1B,SYNE1,dJ45H2.2,enaptin,8B	0.00854856	MODERATE	missense_variant	0.014
chr6	152690101	C	T	MAH_BTN-068	SYNE1	ENSP00000390975:p.,ENSP00000396024:p.,ENSP00000341887:p.,ENSP00000265368:p.												1	1	KEEP		Somatic	2.091e-06	2.091e-06		null	null		14394	11968	32	NS,adrenal_gland,autonomic_ganglia,biliary_tract,bone,breast,central_nervous_system,cervix,endometrium,genital_tract,haematopoietic_and_lymphoid_tissue,kidney,large_intestine,liver,lung,meninges,oesophagus,ovary,pancreas,parathyroid,peritoneum,pituitary,pleura,prostate,salivary_gland,skin,small_intestine,soft_tissue,stomach,thyroid,upper_aerodigestive_tract,urinary_tract		ARCA1,C6orf98,CPG2,KIAA0796,MYNE1,Nesp1,Nesprin-1,SCAR8,SYNE-1B,SYNE1,dJ45H2.2,enaptin,8B	0.000231107	MODERATE	splice_region_variant	0
chr6	152823790	C	G	MAH_BTN-069	SYNE1	ENSP00000265368:p.S289T,ENSP00000390975:p.S296T,ENSP00000396024:p.S296T,ENSP00000341887:p.S289T												1	1	KEEP		Somatic	1.1498e-30	1.1498e-30		null	null		14394	11968	32	NS,adrenal_gland,autonomic_ganglia,biliary_tract,bone,breast,central_nervous_system,cervix,endometrium,genital_tract,haematopoietic_and_lymphoid_tissue,kidney,large_intestine,liver,lung,meninges,oesophagus,ovary,pancreas,parathyroid,peritoneum,pituitary,pleura,prostate,salivary_gland,skin,small_intestine,soft_tissue,stomach,thyroid,upper_aerodigestive_tract,urinary_tract		ARCA1,C6orf98,CPG2,KIAA0796,MYNE1,Nesp1,Nesprin-1,SCAR8,SYNE-1B,SYNE1,dJ45H2.2,enaptin,8B	0.00568445	MODERATE	missense_variant	0.06
chr6	152826444	A	C	MAH_BTN-073	SYNE1	ENSP00000265368:p.L224V,ENSP00000390975:p.L231V,ENSP00000396024:p.L231V,ENSP00000341887:p.L224V												1	1	KEEP		Somatic	0.006377	0.006377		null	null		14394	11968	32	NS,adrenal_gland,autonomic_ganglia,biliary_tract,bone,breast,central_nervous_system,cervix,endometrium,genital_tract,haematopoietic_and_lymphoid_tissue,kidney,large_intestine,liver,lung,meninges,oesophagus,ovary,pancreas,parathyroid,peritoneum,pituitary,pleura,prostate,salivary_gland,skin,small_intestine,soft_tissue,stomach,thyroid,upper_aerodigestive_tract,urinary_tract	Calponin homology domain (5);	ARCA1,C6orf98,CPG2,KIAA0796,MYNE1,Nesp1,Nesprin-1,SCAR8,SYNE-1B,SYNE1,dJ45H2.2,enaptin,8B	0	MODERATE	missense_variant	0.996
chr6	152718078	A	G	MAH_BTN-076	SYNE1	ENSP00000390975:p.L2470P,ENSP00000265368:p.L2463P,ENSP00000396024:p.L2470P,ENSP00000341887:p.L2502P												1	1	KEEP		Somatic	0.0064254	0.0064254		null	null		14394	11968	32	NS,adrenal_gland,autonomic_ganglia,biliary_tract,bone,breast,central_nervous_system,cervix,endometrium,genital_tract,haematopoietic_and_lymphoid_tissue,kidney,large_intestine,liver,lung,meninges,oesophagus,ovary,pancreas,parathyroid,peritoneum,pituitary,pleura,prostate,salivary_gland,skin,small_intestine,soft_tissue,stomach,thyroid,upper_aerodigestive_tract,urinary_tract		ARCA1,C6orf98,CPG2,KIAA0796,MYNE1,Nesp1,Nesprin-1,SCAR8,SYNE-1B,SYNE1,dJ45H2.2,enaptin,8B	0	MODERATE	missense_variant	1
chr6	152563380	G	A	MAH_BTN-078	SYNE1	ENSP00000341887:p.H6242Y,ENSP00000396024:p.H6559Y,ENSP00000390975:p.H6559Y,ENSP00000265368:p.H6630Y												0	1	KEEP			null	null		null	null		14394	11968	32	NS,adrenal_gland,autonomic_ganglia,biliary_tract,bone,breast,central_nervous_system,cervix,endometrium,genital_tract,haematopoietic_and_lymphoid_tissue,kidney,large_intestine,liver,lung,meninges,oesophagus,ovary,pancreas,parathyroid,peritoneum,pituitary,pleura,prostate,salivary_gland,skin,small_intestine,soft_tissue,stomach,thyroid,upper_aerodigestive_tract,urinary_tract		ARCA1,C6orf98,CPG2,KIAA0796,MYNE1,Nesp1,Nesprin-1,SCAR8,SYNE-1B,SYNE1,dJ45H2.2,enaptin,8B	0	MODERATE	missense_variant	1
chr6	152651868	T	C	MAH_BTN-082	SYNE1	ENSP00000265368:p.Q4651R,ENSP00000396024:p.Q4580R,ENSP00000341887:p.Q4398R,ENSP00000390975:p.Q4580R												1	1	KEEP		Somatic	3.8184e-05	3.8184e-05		null	null		14394	11968	32	NS,adrenal_gland,autonomic_ganglia,biliary_tract,bone,breast,central_nervous_system,cervix,endometrium,genital_tract,haematopoietic_and_lymphoid_tissue,kidney,large_intestine,liver,lung,meninges,oesophagus,ovary,pancreas,parathyroid,peritoneum,pituitary,pleura,prostate,salivary_gland,skin,small_intestine,soft_tissue,stomach,thyroid,upper_aerodigestive_tract,urinary_tract		ARCA1,C6orf98,CPG2,KIAA0796,MYNE1,Nesp1,Nesprin-1,SCAR8,SYNE-1B,SYNE1,dJ45H2.2,enaptin,8B	0.001	MODERATE	missense_variant	1
chr6	152680491	C	T	MAH_BTN-082	SYNE1	ENSP00000396024:p.D3475N,ENSP00000341887:p.,ENSP00000390975:p.D3475N,ENSP00000265368:p.D3468N												0	1	KEEP			null	null		null	null		14394	11968	32	NS,adrenal_gland,autonomic_ganglia,biliary_tract,bone,breast,central_nervous_system,cervix,endometrium,genital_tract,haematopoietic_and_lymphoid_tissue,kidney,large_intestine,liver,lung,meninges,oesophagus,ovary,pancreas,parathyroid,peritoneum,pituitary,pleura,prostate,salivary_gland,skin,small_intestine,soft_tissue,stomach,thyroid,upper_aerodigestive_tract,urinary_tract		ARCA1,C6orf98,CPG2,KIAA0796,MYNE1,Nesp1,Nesprin-1,SCAR8,SYNE-1B,SYNE1,dJ45H2.2,enaptin,8B	0	MODERATE	missense_variant	0.897
chr6	152470620	G	A	MAH_BTN-083	SYNE1	ENSP00000396024:p.R8141C,ENSP00000390975:p.R8141C,ENSP00000265368:p.R8212C,ENSP00000341887:p.R7824C												1	1	KEEP		Somatic	2.3367e-26	2.3367e-26	COSM3393865,COSM3393866,COSM3393867,COSM3393868,COSM3393869,COSM3393865,COSM3393866,COSM3393867,COSM3393868,COSM3393869,COSM3393865,COSM3393866,COSM3393867,COSM3393868,COSM3393869,COSM3393865,COSM3393866,COSM3393867,COSM3393868,COSM3393869	20	1	pancreas	14394	11968	32	NS,adrenal_gland,autonomic_ganglia,biliary_tract,bone,breast,central_nervous_system,cervix,endometrium,genital_tract,haematopoietic_and_lymphoid_tissue,kidney,large_intestine,liver,lung,meninges,oesophagus,ovary,pancreas,parathyroid,peritoneum,pituitary,pleura,prostate,salivary_gland,skin,small_intestine,soft_tissue,stomach,thyroid,upper_aerodigestive_tract,urinary_tract		ARCA1,C6orf98,CPG2,KIAA0796,MYNE1,Nesp1,Nesprin-1,SCAR8,SYNE-1B,SYNE1,dJ45H2.2,enaptin,8B	0.000242277	MODERATE	missense_variant	1
chr6	152560708	C	T	MAH_BTN-083	SYNE1	ENSP00000396024:p.R6605Q,ENSP00000265368:p.R6676Q,ENSP00000390975:p.R6605Q,ENSP00000341887:p.R6288Q												1	1	KEEP		Somatic	8.7966e-12	8.7966e-12		null	null		14394	11968	32	NS,adrenal_gland,autonomic_ganglia,biliary_tract,bone,breast,central_nervous_system,cervix,endometrium,genital_tract,haematopoietic_and_lymphoid_tissue,kidney,large_intestine,liver,lung,meninges,oesophagus,ovary,pancreas,parathyroid,peritoneum,pituitary,pleura,prostate,salivary_gland,skin,small_intestine,soft_tissue,stomach,thyroid,upper_aerodigestive_tract,urinary_tract		ARCA1,C6orf98,CPG2,KIAA0796,MYNE1,Nesp1,Nesprin-1,SCAR8,SYNE-1B,SYNE1,dJ45H2.2,enaptin,8B	0.0069	MODERATE	missense_variant	0.002
chr6	152763241	C	T	MAH_BTN-083	SYNE1	ENSP00000396024:p.R1333H,ENSP00000390975:p.R1333H,ENSP00000265368:p.R1326H,ENSP00000341887:p.R1392H												1	1	KEEP		Somatic	3.0612e-16	3.0612e-16	COSM3021166,COSM3021167,COSM3021168,COSM4351850,COSM4351851,COSM3021166,COSM3021167,COSM3021168,COSM4351850,COSM4351851	10	1	stomach	14394	11968	32	NS,adrenal_gland,autonomic_ganglia,biliary_tract,bone,breast,central_nervous_system,cervix,endometrium,genital_tract,haematopoietic_and_lymphoid_tissue,kidney,large_intestine,liver,lung,meninges,oesophagus,ovary,pancreas,parathyroid,peritoneum,pituitary,pleura,prostate,salivary_gland,skin,small_intestine,soft_tissue,stomach,thyroid,upper_aerodigestive_tract,urinary_tract		ARCA1,C6orf98,CPG2,KIAA0796,MYNE1,Nesp1,Nesprin-1,SCAR8,SYNE-1B,SYNE1,dJ45H2.2,enaptin,8B	0.00666667	MODERATE	missense_variant	0.004
chr6	152652096	C	A	MAH_BTN-089	SYNE1	ENSP00000341887:p.C4322F,ENSP00000390975:p.C4504F,ENSP00000396024:p.C4504F,ENSP00000265368:p.C4575F												1	1	KEEP		Somatic	7.7752e-12	7.7752e-12		null	null		14394	11968	32	NS,adrenal_gland,autonomic_ganglia,biliary_tract,bone,breast,central_nervous_system,cervix,endometrium,genital_tract,haematopoietic_and_lymphoid_tissue,kidney,large_intestine,liver,lung,meninges,oesophagus,ovary,pancreas,parathyroid,peritoneum,pituitary,pleura,prostate,salivary_gland,skin,small_intestine,soft_tissue,stomach,thyroid,upper_aerodigestive_tract,urinary_tract		ARCA1,C6orf98,CPG2,KIAA0796,MYNE1,Nesp1,Nesprin-1,SCAR8,SYNE-1B,SYNE1,dJ45H2.2,enaptin,8B	0.00374065	MODERATE	missense_variant	1
chr6	152523014	G	A	MAH_R17017908LU01	SYNE1	ENSP00000341887:p.S7309L,ENSP00000396024:p.S7626L,ENSP00000265368:p.S7697L,ENSP00000390975:p.S7626L												1	1	KEEP		Somatic	3.005499893333763E-4	3.005499893333763E-4	COSM1441285,COSM258626,COSM258627,COSM4762719,COSM4762720	12	2	large_intestine,stomach	14909	12370	32	NS,adrenal_gland,autonomic_ganglia,biliary_tract,bone,breast,central_nervous_system,cervix,endometrium,genital_tract,haematopoietic_and_lymphoid_tissue,kidney,large_intestine,liver,lung,meninges,oesophagus,ovary,pancreas,parathyroid,peritoneum,pituitary,pleura,prostate,salivary_gland,skin,small_intestine,soft_tissue,stomach,thyroid,upper_aerodigestive_tract,urinary_tract		SYNE1,C6orf98,SYNE-1B,KIAA0796,8B,Nesprin-1,enaptin,MYNE1,CPG2,dJ45H2.2,SCAR8,ARCA1,Nesp1	6.535093416459858E-5	MODERATE	missense_variant	0.9980000257492065
chr6	152621829	G	C	MAH_R17017893LU01	SYNE1	ENSP00000396024:p.P5806A,ENSP00000265368:p.P5877A,ENSP00000390975:p.P5806A,ENSP00000341887:p.P5489A												1	1	KEEP		Somatic	2.3037000573822297E-6	2.3037000573822297E-6		null	null		14909	12370	32	NS,adrenal_gland,autonomic_ganglia,biliary_tract,bone,breast,central_nervous_system,cervix,endometrium,genital_tract,haematopoietic_and_lymphoid_tissue,kidney,large_intestine,liver,lung,meninges,oesophagus,ovary,pancreas,parathyroid,peritoneum,pituitary,pleura,prostate,salivary_gland,skin,small_intestine,soft_tissue,stomach,thyroid,upper_aerodigestive_tract,urinary_tract		SYNE1,C6orf98,SYNE-1B,KIAA0796,8B,Nesprin-1,enaptin,MYNE1,CPG2,dJ45H2.2,SCAR8,ARCA1,Nesp1	0.0010000000474974513	MODERATE	missense_variant	0.9900000095367432
chr6	152642914	G	A	MAH_R17017900LU01	SYNE1	ENSP00000341887:p.T5015M,ENSP00000265368:p.T5342M,ENSP00000396024:p.T5271M,ENSP00000390975:p.T5271M												1	1	KEEP		Somatic	0.00703920004889369	0.00703920004889369	COSM1074846,COSM1074847,COSM1596051,COSM4866987,COSM4866988,COSM1074846,COSM1074847,COSM1596051,COSM4866987,COSM4866988	10	1	endometrium	14909	12370	32	NS,adrenal_gland,autonomic_ganglia,biliary_tract,bone,breast,central_nervous_system,cervix,endometrium,genital_tract,haematopoietic_and_lymphoid_tissue,kidney,large_intestine,liver,lung,meninges,oesophagus,ovary,pancreas,parathyroid,peritoneum,pituitary,pleura,prostate,salivary_gland,skin,small_intestine,soft_tissue,stomach,thyroid,upper_aerodigestive_tract,urinary_tract		SYNE1,C6orf98,SYNE-1B,KIAA0796,8B,Nesprin-1,enaptin,MYNE1,CPG2,dJ45H2.2,SCAR8,ARCA1,Nesp1	0.0012345700524747372	MODERATE	missense_variant	1.0
chr6	152642914	G	A	MAH_R17017897LU01	SYNE1	ENSP00000341887:p.T5015M,ENSP00000265368:p.T5342M,ENSP00000396024:p.T5271M,ENSP00000390975:p.T5271M												1	1	KEEP		Somatic	2.5371999372526844E-32	2.5371999372526844E-32	COSM1074846,COSM1074847,COSM1596051,COSM4866987,COSM4866988,COSM1074846,COSM1074847,COSM1596051,COSM4866987,COSM4866988	10	1	endometrium	14909	12370	32	NS,adrenal_gland,autonomic_ganglia,biliary_tract,bone,breast,central_nervous_system,cervix,endometrium,genital_tract,haematopoietic_and_lymphoid_tissue,kidney,large_intestine,liver,lung,meninges,oesophagus,ovary,pancreas,parathyroid,peritoneum,pituitary,pleura,prostate,salivary_gland,skin,small_intestine,soft_tissue,stomach,thyroid,upper_aerodigestive_tract,urinary_tract		SYNE1,C6orf98,SYNE-1B,KIAA0796,8B,Nesprin-1,enaptin,MYNE1,CPG2,dJ45H2.2,SCAR8,ARCA1,Nesp1	0.0012345700524747372	MODERATE	missense_variant	1.0
chr6	152646425	C	T	MAH_R17017913LU01	SYNE1	ENSP00000265368:p.V5151M,ENSP00000396024:p.V5080M,ENSP00000390975:p.V5080M,ENSP00000341887:p.V4844M												1	1	KEEP		Somatic	9.273299656342715E-5	9.273299656342715E-5		null	null		14909	12370	32	NS,adrenal_gland,autonomic_ganglia,biliary_tract,bone,breast,central_nervous_system,cervix,endometrium,genital_tract,haematopoietic_and_lymphoid_tissue,kidney,large_intestine,liver,lung,meninges,oesophagus,ovary,pancreas,parathyroid,peritoneum,pituitary,pleura,prostate,salivary_gland,skin,small_intestine,soft_tissue,stomach,thyroid,upper_aerodigestive_tract,urinary_tract		SYNE1,C6orf98,SYNE-1B,KIAA0796,8B,Nesprin-1,enaptin,MYNE1,CPG2,dJ45H2.2,SCAR8,ARCA1,Nesp1	0.00760185020044446	MODERATE	missense_variant	0.019999999552965164
chr6	152841655	A	G	MAH_R17017908LU01	SYNE1	ENSP00000341887:p.M83T,ENSP00000396024:p.M83T,ENSP00000390975:p.M83T,ENSP00000265368:p.M83T												1	1	KEEP		Somatic	6.739400123478845E-5	6.739400123478845E-5		null	null		14909	12370	32	NS,adrenal_gland,autonomic_ganglia,biliary_tract,bone,breast,central_nervous_system,cervix,endometrium,genital_tract,haematopoietic_and_lymphoid_tissue,kidney,large_intestine,liver,lung,meninges,oesophagus,ovary,pancreas,parathyroid,peritoneum,pituitary,pleura,prostate,salivary_gland,skin,small_intestine,soft_tissue,stomach,thyroid,upper_aerodigestive_tract,urinary_tract	Calponin homology domain (5);	SYNE1,C6orf98,SYNE-1B,KIAA0796,8B,Nesprin-1,enaptin,MYNE1,CPG2,dJ45H2.2,SCAR8,ARCA1,Nesp1	0.0	MODERATE	missense_variant	0.2669999897480011

## Sheet: PIK3CA
Chrom	Pos	Reference	Call	PN	Gene_symbol	COSMIC_HGVSp	Drug_Gene	Drug_Gene_ApprovalStatus	Drug_Pathway	Drug_Pathway_ApprovalStatus	Drug_SourcePathway	Drug_Mechanism_of_Action	Gene_ActionableDrugClasses	Gene_ActionablePathways	Gene_ActionableTumors	ResistancexSensitivity_Variants	Gene_ActionableMutations	caller_both	caller_either	mutect_judgement	mutect_failure_reasons	varscan2_somatic_status	varscan2_somatic_p_value	varscan2_variant_p_value	COSMIC_IDs	COSMIC_count_vars	COSMIC_pscount	COSMIC_primarysites	COSMIC_count_varsInGene	COSMIC_count_lociInGene	COSMIC_count_primarysitesInGene	COSMIC_primarysitesInGene	dbNSFP_Interpro_domain	GENE_Aliases	VEP_Max_Af	VEP_Max_Impact	VEP_max_consequence	VEP_max_score
chr3	178921553	T	A	MAH_BTN-004	PIK3CA	NP_006209.2:p.N345K,ENSP00000263967:p.N345K	EVEROLIMUS,TEMSIROLIMUS	FDA Approved,FDA Approved					PI3K inhibitors, AKT inhibitors , mTOR inhibitors	PI3K	Breast, colorectal, endometrial cancer		Mutation or amplification	1	1	KEEP		Somatic	0.0033988	0.0033988	COSM132748,COSM754	170	11	biliary_tract,breast,central_nervous_system,endometrium,large_intestine,oesophagus,prostate,salivary_gland,soft_tissue,stomach,urinary_tract	10535	1027	36	NS,autonomic_ganglia,biliary_tract,bone,breast,central_nervous_system,cervix,endometrium,eye,gastrointestinal_tract_(site_indeterminate),genital_tract,haematopoietic_and_lymphoid_tissue,kidney,large_intestine,liver,lung,meninges,oesophagus,ovary,pancreas,parathyroid,penis,peritoneum,pituitary,pleura,prostate,salivary_gland,skin,small_intestine,soft_tissue,stomach,thymus,thyroid,upper_aerodigestiv…	C2 calcium-dependent membrane targeting (1);C2 calcium/lipid-binding domain, CaLB (1);Phosphoinositide 3-kinase, C2 (1);	PI3K,PIK3CA	0	MODERATE	missense_variant	1
chr3	178952085	A	G	MAH_BTN-007	PIK3CA	NP_006209.2:p.H1047R,ENSP00000263967:p.H1047R	EVEROLIMUS,TEMSIROLIMUS	FDA Approved,FDA Approved					PI3K inhibitors, AKT inhibitors , mTOR inhibitors	PI3K	Breast, colorectal, endometrial cancer		Mutation or amplification	1	1	KEEP		Somatic	1.2249e-18	1.2249e-18	COSM775,COSM94986,COSM775,COSM94986,COSM775,COSM94986,COSM775,COSM94986,COSM775,COSM94986,COSM775,COSM94986,COSM775,COSM94986,COSM775,COSM94986,COSM775,COSM94986,COSM775,COSM94986,COSM775,COSM94986,COSM775,COSM94986,COSM775,COSM94986,COSM775,COSM94986,COSM775,COSM94986	40785	28	NS,biliary_tract,bone,breast,central_nervous_system,cervix,endometrium,gastrointestinal_tract_(site_indeterminate),haematopoietic_and_lymphoid_tissue,kidney,large_intest...,large_intestine,liver,lung,meninges,oesophagus,ovary,pancreas,pituitary,prostate,salivary_gland,skin,small_intestine,soft_tissue,stomach,thyroid,upper_aerodigestive_tract,urinary_tract	10535	1027	36	NS,autonomic_ganglia,biliary_tract,bone,breast,central_nervous_system,cervix,endometrium,eye,gastrointestinal_tract_(site_indeterminate),genital_tract,haematopoietic_and_lymphoid_tissue,kidney,large_intestine,liver,lung,meninges,oesophagus,ovary,pancreas,parathyroid,penis,peritoneum,pituitary,pleura,prostate,salivary_gland,skin,small_intestine,soft_tissue,stomach,thymus,thyroid,upper_aerodigestiv…	Protein kinase-like domain (1);Phosphatidylinositol 3-/4-kinase, catalytic (3);	PI3K,PIK3CA	1.50489e-05	MODERATE	missense_variant	0.981
chr3	178936091	G	A	MAH_BTN-008	PIK3CA	ENSP00000263967:p.E545K,NP_006209.2:p.E545K	EVEROLIMUS,TEMSIROLIMUS	FDA Approved,FDA Approved					PI3K inhibitors, AKT inhibitors , mTOR inhibitors	PI3K	Breast, colorectal, endometrial cancer		Mutation or amplification	1	1	KEEP		Somatic	7.0924e-18	7.0924e-18	COSM125370,COSM763,COSM125370,COSM763,COSM125370,COSM763	6117	31	...,NS,biliary_tract,breast,central_nervous_system,cervix,endometrium,gastrointestinal_tract_(site_indeterminate),haematopoietic_and_lymphoid_tissue,kidney,large_intestine,liver,lung,oesophagus,ovary,pancreas,parathyroid,penis,peritoneum,pituitary,prostate,salivary_gland,skin,small_intestine,soft_tissue,stomach,thymus,thyroid,upper_aerodigestive_tract,urinary_tract,vulva	10535	1027	36	NS,autonomic_ganglia,biliary_tract,bone,breast,central_nervous_system,cervix,endometrium,eye,gastrointestinal_tract_(site_indeterminate),genital_tract,haematopoietic_and_lymphoid_tissue,kidney,large_intestine,liver,lung,meninges,oesophagus,ovary,pancreas,parathyroid,penis,peritoneum,pituitary,pleura,prostate,salivary_gland,skin,small_intestine,soft_tissue,stomach,thymus,thyroid,upper_aerodigestiv…	Phosphoinositide 3-kinase, accessory (PIK) domain (3);Armadillo-type fold (1);	PI3K,PIK3CA	1.50811e-05	MODERATE	missense_variant	0.998
chr3	178941879	A	G	MAH_BTN-010	PIK3CA	NP_006209.2:p.K733R,ENSP00000263967:p.K733R	EVEROLIMUS,TEMSIROLIMUS	FDA Approved,FDA Approved					PI3K inhibitors, AKT inhibitors , mTOR inhibitors	PI3K	Breast, colorectal, endometrial cancer		Mutation or amplification	1	1	KEEP		Somatic	7.8126e-18	7.8126e-18	COSM1566569,COSM6148,COSM1566569,COSM6148,COSM1566569,COSM6148	9	2	bone,large_intestine	10535	1027	36	NS,autonomic_ganglia,biliary_tract,bone,breast,central_nervous_system,cervix,endometrium,eye,gastrointestinal_tract_(site_indeterminate),genital_tract,haematopoietic_and_lymphoid_tissue,kidney,large_intestine,liver,lung,meninges,oesophagus,ovary,pancreas,parathyroid,penis,peritoneum,pituitary,pleura,prostate,salivary_gland,skin,small_intestine,soft_tissue,stomach,thymus,thyroid,upper_aerodigestiv…	Protein kinase-like domain (1);	PI3K,PIK3CA	0.00593161	MODERATE	missense_variant	0.955
chr3	178922370	A	G	MAH_BTN-011	PIK3CA	NP_006209.2:p.N380S,ENSP00000263967:p.N380S	EVEROLIMUS,TEMSIROLIMUS	FDA Approved,FDA Approved					PI3K inhibitors, AKT inhibitors , mTOR inhibitors	PI3K	Breast, colorectal, endometrial cancer		Mutation or amplification	0	1	KEEP			null	null	COSM4115413,COSM4115414	2	1	stomach	10535	1027	36	NS,autonomic_ganglia,biliary_tract,bone,breast,central_nervous_system,cervix,endometrium,eye,gastrointestinal_tract_(site_indeterminate),genital_tract,haematopoietic_and_lymphoid_tissue,kidney,large_intestine,liver,lung,meninges,oesophagus,ovary,pancreas,parathyroid,penis,peritoneum,pituitary,pleura,prostate,salivary_gland,skin,small_intestine,soft_tissue,stomach,thymus,thyroid,upper_aerodigestiv…	C2 calcium-dependent membrane targeting (1);C2 calcium/lipid-binding domain, CaLB (1);Phosphoinositide 3-kinase, C2 (2);	PI3K,PIK3CA	0.001002	MODERATE	missense_variant	0.6
chr3	178952085	A	G	MAH_BTN-011	PIK3CA	NP_006209.2:p.H1047R,ENSP00000263967:p.H1047R	EVEROLIMUS,TEMSIROLIMUS	FDA Approved,FDA Approved					PI3K inhibitors, AKT inhibitors , mTOR inhibitors	PI3K	Breast, colorectal, endometrial cancer		Mutation or amplification	1	1	KEEP		Somatic	0	0	COSM775,COSM94986,COSM775,COSM94986,COSM775,COSM94986,COSM775,COSM94986,COSM775,COSM94986,COSM775,COSM94986,COSM775,COSM94986,COSM775,COSM94986,COSM775,COSM94986,COSM775,COSM94986,COSM775,COSM94986,COSM775,COSM94986,COSM775,COSM94986,COSM775,COSM94986,COSM775,COSM94986	40785	28	NS,biliary_tract,bone,breast,central_nervous_system,cervix,endometrium,gastrointestinal_tract_(site_indeterminate),haematopoietic_and_lymphoid_tissue,kidney,large_intest...,large_intestine,liver,lung,meninges,oesophagus,ovary,pancreas,pituitary,prostate,salivary_gland,skin,small_intestine,soft_tissue,stomach,thyroid,upper_aerodigestive_tract,urinary_tract	10535	1027	36	NS,autonomic_ganglia,biliary_tract,bone,breast,central_nervous_system,cervix,endometrium,eye,gastrointestinal_tract_(site_indeterminate),genital_tract,haematopoietic_and_lymphoid_tissue,kidney,large_intestine,liver,lung,meninges,oesophagus,ovary,pancreas,parathyroid,penis,peritoneum,pituitary,pleura,prostate,salivary_gland,skin,small_intestine,soft_tissue,stomach,thymus,thyroid,upper_aerodigestiv…	Protein kinase-like domain (1);Phosphatidylinositol 3-/4-kinase, catalytic (3);	PI3K,PIK3CA	1.50489e-05	MODERATE	missense_variant	0.981
chr3	178952085	A	G	MAH_BTN-012	PIK3CA	NP_006209.2:p.H1047R,ENSP00000263967:p.H1047R	EVEROLIMUS,TEMSIROLIMUS	FDA Approved,FDA Approved					PI3K inhibitors, AKT inhibitors , mTOR inhibitors	PI3K	Breast, colorectal, endometrial cancer		Mutation or amplification	1	1	KEEP		Somatic	2.2574e-23	2.2574e-23	COSM775,COSM94986,COSM775,COSM94986,COSM775,COSM94986,COSM775,COSM94986,COSM775,COSM94986,COSM775,COSM94986,COSM775,COSM94986,COSM775,COSM94986,COSM775,COSM94986,COSM775,COSM94986,COSM775,COSM94986,COSM775,COSM94986,COSM775,COSM94986,COSM775,COSM94986,COSM775,COSM94986	40785	28	NS,biliary_tract,bone,breast,central_nervous_system,cervix,endometrium,gastrointestinal_tract_(site_indeterminate),haematopoietic_and_lymphoid_tissue,kidney,large_intest...,large_intestine,liver,lung,meninges,oesophagus,ovary,pancreas,pituitary,prostate,salivary_gland,skin,small_intestine,soft_tissue,stomach,thyroid,upper_aerodigestive_tract,urinary_tract	10535	1027	36	NS,autonomic_ganglia,biliary_tract,bone,breast,central_nervous_system,cervix,endometrium,eye,gastrointestinal_tract_(site_indeterminate),genital_tract,haematopoietic_and_lymphoid_tissue,kidney,large_intestine,liver,lung,meninges,oesophagus,ovary,pancreas,parathyroid,penis,peritoneum,pituitary,pleura,prostate,salivary_gland,skin,small_intestine,soft_tissue,stomach,thymus,thyroid,upper_aerodigestiv…	Protein kinase-like domain (1);Phosphatidylinositol 3-/4-kinase, catalytic (3);	PI3K,PIK3CA	1.50489e-05	MODERATE	missense_variant	0.981
chr3	178941879	A	G	MAH_BTN-017	PIK3CA	NP_006209.2:p.K733R,ENSP00000263967:p.K733R	EVEROLIMUS,TEMSIROLIMUS	FDA Approved,FDA Approved					PI3K inhibitors, AKT inhibitors , mTOR inhibitors	PI3K	Breast, colorectal, endometrial cancer		Mutation or amplification	1	1	KEEP		Somatic	6.2266e-08	6.2266e-08	COSM1566569,COSM6148,COSM1566569,COSM6148,COSM1566569,COSM6148	9	2	bone,large_intestine	10535	1027	36	NS,autonomic_ganglia,biliary_tract,bone,breast,central_nervous_system,cervix,endometrium,eye,gastrointestinal_tract_(site_indeterminate),genital_tract,haematopoietic_and_lymphoid_tissue,kidney,large_intestine,liver,lung,meninges,oesophagus,ovary,pancreas,parathyroid,penis,peritoneum,pituitary,pleura,prostate,salivary_gland,skin,small_intestine,soft_tissue,stomach,thymus,thyroid,upper_aerodigestiv…	Protein kinase-like domain (1);	PI3K,PIK3CA	0.00593161	MODERATE	missense_variant	0.955
chr3	178952085	A	G	MAH_BTN-023	PIK3CA	NP_006209.2:p.H1047R,ENSP00000263967:p.H1047R	EVEROLIMUS,TEMSIROLIMUS	FDA Approved,FDA Approved					PI3K inhibitors, AKT inhibitors , mTOR inhibitors	PI3K	Breast, colorectal, endometrial cancer		Mutation or amplification	1	1	KEEP		Somatic	8.655e-20	8.655e-20	COSM775,COSM94986,COSM775,COSM94986,COSM775,COSM94986,COSM775,COSM94986,COSM775,COSM94986,COSM775,COSM94986,COSM775,COSM94986,COSM775,COSM94986,COSM775,COSM94986,COSM775,COSM94986,COSM775,COSM94986,COSM775,COSM94986,COSM775,COSM94986,COSM775,COSM94986,COSM775,COSM94986	40785	28	NS,biliary_tract,bone,breast,central_nervous_system,cervix,endometrium,gastrointestinal_tract_(site_indeterminate),haematopoietic_and_lymphoid_tissue,kidney,large_intest...,large_intestine,liver,lung,meninges,oesophagus,ovary,pancreas,pituitary,prostate,salivary_gland,skin,small_intestine,soft_tissue,stomach,thyroid,upper_aerodigestive_tract,urinary_tract	10535	1027	36	NS,autonomic_ganglia,biliary_tract,bone,breast,central_nervous_system,cervix,endometrium,eye,gastrointestinal_tract_(site_indeterminate),genital_tract,haematopoietic_and_lymphoid_tissue,kidney,large_intestine,liver,lung,meninges,oesophagus,ovary,pancreas,parathyroid,penis,peritoneum,pituitary,pleura,prostate,salivary_gland,skin,small_intestine,soft_tissue,stomach,thymus,thyroid,upper_aerodigestiv…	Protein kinase-like domain (1);Phosphatidylinositol 3-/4-kinase, catalytic (3);	PI3K,PIK3CA	1.50489e-05	MODERATE	missense_variant	0.981
chr3	178952085	A	G	MAH_BTN-035	PIK3CA	NP_006209.2:p.H1047R,ENSP00000263967:p.H1047R	EVEROLIMUS,TEMSIROLIMUS	FDA Approved,FDA Approved					PI3K inhibitors, AKT inhibitors , mTOR inhibitors	PI3K	Breast, colorectal, endometrial cancer		Mutation or amplification	1	1	KEEP		Somatic	5.5153e-20	5.5153e-20	COSM775,COSM94986,COSM775,COSM94986,COSM775,COSM94986,COSM775,COSM94986,COSM775,COSM94986,COSM775,COSM94986,COSM775,COSM94986,COSM775,COSM94986,COSM775,COSM94986,COSM775,COSM94986,COSM775,COSM94986,COSM775,COSM94986,COSM775,COSM94986,COSM775,COSM94986,COSM775,COSM94986	40785	28	NS,biliary_tract,bone,breast,central_nervous_system,cervix,endometrium,gastrointestinal_tract_(site_indeterminate),haematopoietic_and_lymphoid_tissue,kidney,large_intest...,large_intestine,liver,lung,meninges,oesophagus,ovary,pancreas,pituitary,prostate,salivary_gland,skin,small_intestine,soft_tissue,stomach,thyroid,upper_aerodigestive_tract,urinary_tract	10535	1027	36	NS,autonomic_ganglia,biliary_tract,bone,breast,central_nervous_system,cervix,endometrium,eye,gastrointestinal_tract_(site_indeterminate),genital_tract,haematopoietic_and_lymphoid_tissue,kidney,large_intestine,liver,lung,meninges,oesophagus,ovary,pancreas,parathyroid,penis,peritoneum,pituitary,pleura,prostate,salivary_gland,skin,small_intestine,soft_tissue,stomach,thymus,thyroid,upper_aerodigestiv…	Protein kinase-like domain (1);Phosphatidylinositol 3-/4-kinase, catalytic (3);	PI3K,PIK3CA	1.50489e-05	MODERATE	missense_variant	0.981
chr3	178952085	A	G	MAH_BTN-040	PIK3CA	NP_006209.2:p.H1047R,ENSP00000263967:p.H1047R	EVEROLIMUS,TEMSIROLIMUS	FDA Approved,FDA Approved					PI3K inhibitors, AKT inhibitors , mTOR inhibitors	PI3K	Breast, colorectal, endometrial cancer		Mutation or amplification	1	1	KEEP		Somatic	1.808e-19	1.808e-19	COSM775,COSM94986,COSM775,COSM94986,COSM775,COSM94986,COSM775,COSM94986,COSM775,COSM94986,COSM775,COSM94986,COSM775,COSM94986,COSM775,COSM94986,COSM775,COSM94986,COSM775,COSM94986,COSM775,COSM94986,COSM775,COSM94986,COSM775,COSM94986,COSM775,COSM94986,COSM775,COSM94986	40785	28	NS,biliary_tract,bone,breast,central_nervous_system,cervix,endometrium,gastrointestinal_tract_(site_indeterminate),haematopoietic_and_lymphoid_tissue,kidney,large_intest...,large_intestine,liver,lung,meninges,oesophagus,ovary,pancreas,pituitary,prostate,salivary_gland,skin,small_intestine,soft_tissue,stomach,thyroid,upper_aerodigestive_tract,urinary_tract	10535	1027	36	NS,autonomic_ganglia,biliary_tract,bone,breast,central_nervous_system,cervix,endometrium,eye,gastrointestinal_tract_(site_indeterminate),genital_tract,haematopoietic_and_lymphoid_tissue,kidney,large_intestine,liver,lung,meninges,oesophagus,ovary,pancreas,parathyroid,penis,peritoneum,pituitary,pleura,prostate,salivary_gland,skin,small_intestine,soft_tissue,stomach,thymus,thyroid,upper_aerodigestiv…	Protein kinase-like domain (1);Phosphatidylinositol 3-/4-kinase, catalytic (3);	PI3K,PIK3CA	1.50489e-05	MODERATE	missense_variant	0.981
chr3	178952085	A	G	MAH_BTN-041	PIK3CA	NP_006209.2:p.H1047R,ENSP00000263967:p.H1047R	EVEROLIMUS,TEMSIROLIMUS	FDA Approved,FDA Approved					PI3K inhibitors, AKT inhibitors , mTOR inhibitors	PI3K	Breast, colorectal, endometrial cancer		Mutation or amplification	1	1	KEEP		Somatic	0	0	COSM775,COSM94986,COSM775,COSM94986,COSM775,COSM94986,COSM775,COSM94986,COSM775,COSM94986,COSM775,COSM94986,COSM775,COSM94986,COSM775,COSM94986,COSM775,COSM94986,COSM775,COSM94986,COSM775,COSM94986,COSM775,COSM94986,COSM775,COSM94986,COSM775,COSM94986,COSM775,COSM94986	40785	28	NS,biliary_tract,bone,breast,central_nervous_system,cervix,endometrium,gastrointestinal_tract_(site_indeterminate),haematopoietic_and_lymphoid_tissue,kidney,large_intest...,large_intestine,liver,lung,meninges,oesophagus,ovary,pancreas,pituitary,prostate,salivary_gland,skin,small_intestine,soft_tissue,stomach,thyroid,upper_aerodigestive_tract,urinary_tract	10535	1027	36	NS,autonomic_ganglia,biliary_tract,bone,breast,central_nervous_system,cervix,endometrium,eye,gastrointestinal_tract_(site_indeterminate),genital_tract,haematopoietic_and_lymphoid_tissue,kidney,large_intestine,liver,lung,meninges,oesophagus,ovary,pancreas,parathyroid,penis,peritoneum,pituitary,pleura,prostate,salivary_gland,skin,small_intestine,soft_tissue,stomach,thymus,thyroid,upper_aerodigestiv…	Protein kinase-like domain (1);Phosphatidylinositol 3-/4-kinase, catalytic (3);	PI3K,PIK3CA	1.50489e-05	MODERATE	missense_variant	0.981
chr3	178952085	A	G	MAH_BTN-046	PIK3CA	NP_006209.2:p.H1047R,ENSP00000263967:p.H1047R	EVEROLIMUS,TEMSIROLIMUS	FDA Approved,FDA Approved					PI3K inhibitors, AKT inhibitors , mTOR inhibitors	PI3K	Breast, colorectal, endometrial cancer		Mutation or amplification	1	1	KEEP		Somatic	0	0	COSM775,COSM94986,COSM775,COSM94986,COSM775,COSM94986,COSM775,COSM94986,COSM775,COSM94986,COSM775,COSM94986,COSM775,COSM94986,COSM775,COSM94986,COSM775,COSM94986,COSM775,COSM94986,COSM775,COSM94986,COSM775,COSM94986,COSM775,COSM94986,COSM775,COSM94986,COSM775,COSM94986	40785	28	NS,biliary_tract,bone,breast,central_nervous_system,cervix,endometrium,gastrointestinal_tract_(site_indeterminate),haematopoietic_and_lymphoid_tissue,kidney,large_intest...,large_intestine,liver,lung,meninges,oesophagus,ovary,pancreas,pituitary,prostate,salivary_gland,skin,small_intestine,soft_tissue,stomach,thyroid,upper_aerodigestive_tract,urinary_tract	10535	1027	36	NS,autonomic_ganglia,biliary_tract,bone,breast,central_nervous_system,cervix,endometrium,eye,gastrointestinal_tract_(site_indeterminate),genital_tract,haematopoietic_and_lymphoid_tissue,kidney,large_intestine,liver,lung,meninges,oesophagus,ovary,pancreas,parathyroid,penis,peritoneum,pituitary,pleura,prostate,salivary_gland,skin,small_intestine,soft_tissue,stomach,thymus,thyroid,upper_aerodigestiv…	Protein kinase-like domain (1);Phosphatidylinositol 3-/4-kinase, catalytic (3);	PI3K,PIK3CA	1.50489e-05	MODERATE	missense_variant	0.981
chr3	178936082	G	A	MAH_BTN-052	PIK3CA	ENSP00000263967:p.E542K,NP_006209.2:p.E542K	EVEROLIMUS,TEMSIROLIMUS	FDA Approved,FDA Approved					PI3K inhibitors, AKT inhibitors , mTOR inhibitors	PI3K	Breast, colorectal, endometrial cancer		Mutation or amplification	1	1	KEEP		Somatic	2.4933e-11	2.4933e-11	COSM125369,COSM760	1233	27	biliary_tract,bone,breast,central_nervous_system,cervix,endometrium,gastrointestinal_tract_(site_indeterminate),genital_tract,haematopoietic_and_lymphoid_tissue,kidney,large_intestine,liver,lung,oesophagus,ovary,pancreas,penis,pituitary,prostate,salivary_gland,skin,small_intestine,soft_tissue,stomach,thyroid,upper_aerodigestive_tract,urinary_tract	10535	1027	36	NS,autonomic_ganglia,biliary_tract,bone,breast,central_nervous_system,cervix,endometrium,eye,gastrointestinal_tract_(site_indeterminate),genital_tract,haematopoietic_and_lymphoid_tissue,kidney,large_intestine,liver,lung,meninges,oesophagus,ovary,pancreas,parathyroid,penis,peritoneum,pituitary,pleura,prostate,salivary_gland,skin,small_intestine,soft_tissue,stomach,thymus,thyroid,upper_aerodigestiv…	Phosphoinositide 3-kinase, accessory (PIK) domain (3);Armadillo-type fold (1);	PI3K,PIK3CA	0	MODERATE	missense_variant	0.995
chr3	178952085	A	G	MAH_BTN-053	PIK3CA	NP_006209.2:p.H1047R,ENSP00000263967:p.H1047R	EVEROLIMUS,TEMSIROLIMUS	FDA Approved,FDA Approved					PI3K inhibitors, AKT inhibitors , mTOR inhibitors	PI3K	Breast, colorectal, endometrial cancer		Mutation or amplification	1	1	KEEP		Somatic	0	0	COSM775,COSM94986,COSM775,COSM94986,COSM775,COSM94986,COSM775,COSM94986,COSM775,COSM94986,COSM775,COSM94986,COSM775,COSM94986,COSM775,COSM94986,COSM775,COSM94986,COSM775,COSM94986,COSM775,COSM94986,COSM775,COSM94986,COSM775,COSM94986,COSM775,COSM94986,COSM775,COSM94986	40785	28	NS,biliary_tract,bone,breast,central_nervous_system,cervix,endometrium,gastrointestinal_tract_(site_indeterminate),haematopoietic_and_lymphoid_tissue,kidney,large_intest...,large_intestine,liver,lung,meninges,oesophagus,ovary,pancreas,pituitary,prostate,salivary_gland,skin,small_intestine,soft_tissue,stomach,thyroid,upper_aerodigestive_tract,urinary_tract	10535	1027	36	NS,autonomic_ganglia,biliary_tract,bone,breast,central_nervous_system,cervix,endometrium,eye,gastrointestinal_tract_(site_indeterminate),genital_tract,haematopoietic_and_lymphoid_tissue,kidney,large_intestine,liver,lung,meninges,oesophagus,ovary,pancreas,parathyroid,penis,peritoneum,pituitary,pleura,prostate,salivary_gland,skin,small_intestine,soft_tissue,stomach,thymus,thyroid,upper_aerodigestiv…	Protein kinase-like domain (1);Phosphatidylinositol 3-/4-kinase, catalytic (3);	PI3K,PIK3CA	1.50489e-05	MODERATE	missense_variant	0.981
chr3	178952085	A	G	MAH_BTN-056	PIK3CA	NP_006209.2:p.H1047R,ENSP00000263967:p.H1047R	EVEROLIMUS,TEMSIROLIMUS	FDA Approved,FDA Approved					PI3K inhibitors, AKT inhibitors , mTOR inhibitors	PI3K	Breast, colorectal, endometrial cancer		Mutation or amplification	1	1	KEEP		Somatic	3.595e-15	3.595e-15	COSM775,COSM94986,COSM775,COSM94986,COSM775,COSM94986,COSM775,COSM94986,COSM775,COSM94986,COSM775,COSM94986,COSM775,COSM94986,COSM775,COSM94986,COSM775,COSM94986,COSM775,COSM94986,COSM775,COSM94986,COSM775,COSM94986,COSM775,COSM94986,COSM775,COSM94986,COSM775,COSM94986	40785	28	NS,biliary_tract,bone,breast,central_nervous_system,cervix,endometrium,gastrointestinal_tract_(site_indeterminate),haematopoietic_and_lymphoid_tissue,kidney,large_intest...,large_intestine,liver,lung,meninges,oesophagus,ovary,pancreas,pituitary,prostate,salivary_gland,skin,small_intestine,soft_tissue,stomach,thyroid,upper_aerodigestive_tract,urinary_tract	10535	1027	36	NS,autonomic_ganglia,biliary_tract,bone,breast,central_nervous_system,cervix,endometrium,eye,gastrointestinal_tract_(site_indeterminate),genital_tract,haematopoietic_and_lymphoid_tissue,kidney,large_intestine,liver,lung,meninges,oesophagus,ovary,pancreas,parathyroid,penis,peritoneum,pituitary,pleura,prostate,salivary_gland,skin,small_intestine,soft_tissue,stomach,thymus,thyroid,upper_aerodigestiv…	Protein kinase-like domain (1);Phosphatidylinositol 3-/4-kinase, catalytic (3);	PI3K,PIK3CA	1.50489e-05	MODERATE	missense_variant	0.981
chr3	178952085	A	G	MAH_BTN-057	PIK3CA	NP_006209.2:p.H1047R,ENSP00000263967:p.H1047R	EVEROLIMUS,TEMSIROLIMUS	FDA Approved,FDA Approved					PI3K inhibitors, AKT inhibitors , mTOR inhibitors	PI3K	Breast, colorectal, endometrial cancer		Mutation or amplification	1	1	KEEP		Somatic	1.7604e-09	1.7604e-09	COSM775,COSM94986,COSM775,COSM94986,COSM775,COSM94986,COSM775,COSM94986,COSM775,COSM94986,COSM775,COSM94986,COSM775,COSM94986,COSM775,COSM94986,COSM775,COSM94986,COSM775,COSM94986,COSM775,COSM94986,COSM775,COSM94986,COSM775,COSM94986,COSM775,COSM94986,COSM775,COSM94986	40785	28	NS,biliary_tract,bone,breast,central_nervous_system,cervix,endometrium,gastrointestinal_tract_(site_indeterminate),haematopoietic_and_lymphoid_tissue,kidney,large_intest...,large_intestine,liver,lung,meninges,oesophagus,ovary,pancreas,pituitary,prostate,salivary_gland,skin,small_intestine,soft_tissue,stomach,thyroid,upper_aerodigestive_tract,urinary_tract	10535	1027	36	NS,autonomic_ganglia,biliary_tract,bone,breast,central_nervous_system,cervix,endometrium,eye,gastrointestinal_tract_(site_indeterminate),genital_tract,haematopoietic_and_lymphoid_tissue,kidney,large_intestine,liver,lung,meninges,oesophagus,ovary,pancreas,parathyroid,penis,peritoneum,pituitary,pleura,prostate,salivary_gland,skin,small_intestine,soft_tissue,stomach,thymus,thyroid,upper_aerodigestiv…	Protein kinase-like domain (1);Phosphatidylinositol 3-/4-kinase, catalytic (3);	PI3K,PIK3CA	1.50489e-05	MODERATE	missense_variant	0.981
chr3	178952085	A	G	MAH_BTN-062	PIK3CA	NP_006209.2:p.H1047R,ENSP00000263967:p.H1047R	EVEROLIMUS,TEMSIROLIMUS	FDA Approved,FDA Approved					PI3K inhibitors, AKT inhibitors , mTOR inhibitors	PI3K	Breast, colorectal, endometrial cancer		Mutation or amplification	1	1	KEEP		Somatic	0	0	COSM775,COSM94986,COSM775,COSM94986,COSM775,COSM94986,COSM775,COSM94986,COSM775,COSM94986,COSM775,COSM94986,COSM775,COSM94986,COSM775,COSM94986,COSM775,COSM94986,COSM775,COSM94986,COSM775,COSM94986,COSM775,COSM94986,COSM775,COSM94986,COSM775,COSM94986,COSM775,COSM94986	40785	28	NS,biliary_tract,bone,breast,central_nervous_system,cervix,endometrium,gastrointestinal_tract_(site_indeterminate),haematopoietic_and_lymphoid_tissue,kidney,large_intest...,large_intestine,liver,lung,meninges,oesophagus,ovary,pancreas,pituitary,prostate,salivary_gland,skin,small_intestine,soft_tissue,stomach,thyroid,upper_aerodigestive_tract,urinary_tract	10535	1027	36	NS,autonomic_ganglia,biliary_tract,bone,breast,central_nervous_system,cervix,endometrium,eye,gastrointestinal_tract_(site_indeterminate),genital_tract,haematopoietic_and_lymphoid_tissue,kidney,large_intestine,liver,lung,meninges,oesophagus,ovary,pancreas,parathyroid,penis,peritoneum,pituitary,pleura,prostate,salivary_gland,skin,small_intestine,soft_tissue,stomach,thymus,thyroid,upper_aerodigestiv…	Protein kinase-like domain (1);Phosphatidylinositol 3-/4-kinase, catalytic (3);	PI3K,PIK3CA	1.50489e-05	MODERATE	missense_variant	0.981
chr3	178927980	T	C	MAH_BTN-065	PIK3CA	NP_006209.2:p.C420R,ENSP00000263967:p.C420R	EVEROLIMUS,TEMSIROLIMUS	FDA Approved,FDA Approved					PI3K inhibitors, AKT inhibitors , mTOR inhibitors	PI3K	Breast, colorectal, endometrial cancer		Mutation or amplification	1	1	KEEP		Somatic	1.2355e-09	1.2355e-09	COSM267862,COSM757	122	11	NS,breast,central_nervous_system,endometrium,large_intestine,lung,oesophagus,prostate,salivary_gland,small_intestine,stomach	10535	1027	36	NS,autonomic_ganglia,biliary_tract,bone,breast,central_nervous_system,cervix,endometrium,eye,gastrointestinal_tract_(site_indeterminate),genital_tract,haematopoietic_and_lymphoid_tissue,kidney,large_intestine,liver,lung,meninges,oesophagus,ovary,pancreas,parathyroid,penis,peritoneum,pituitary,pleura,prostate,salivary_gland,skin,small_intestine,soft_tissue,stomach,thymus,thyroid,upper_aerodigestiv…	C2 calcium-dependent membrane targeting (1);C2 calcium/lipid-binding domain, CaLB (1);Phosphoinositide 3-kinase, C2 (2);	PI3K,PIK3CA	0	MODERATE	missense_variant	0.997
chr3	178936091	G	A	MAH_BTN-066	PIK3CA	ENSP00000263967:p.E545K,NP_006209.2:p.E545K	EVEROLIMUS,TEMSIROLIMUS	FDA Approved,FDA Approved					PI3K inhibitors, AKT inhibitors , mTOR inhibitors	PI3K	Breast, colorectal, endometrial cancer		Mutation or amplification	1	1	KEEP		Somatic	6.7171e-08	6.7171e-08	COSM125370,COSM763,COSM125370,COSM763,COSM125370,COSM763	6117	31	...,NS,biliary_tract,breast,central_nervous_system,cervix,endometrium,gastrointestinal_tract_(site_indeterminate),haematopoietic_and_lymphoid_tissue,kidney,large_intestine,liver,lung,oesophagus,ovary,pancreas,parathyroid,penis,peritoneum,pituitary,prostate,salivary_gland,skin,small_intestine,soft_tissue,stomach,thymus,thyroid,upper_aerodigestive_tract,urinary_tract,vulva	10535	1027	36	NS,autonomic_ganglia,biliary_tract,bone,breast,central_nervous_system,cervix,endometrium,eye,gastrointestinal_tract_(site_indeterminate),genital_tract,haematopoietic_and_lymphoid_tissue,kidney,large_intestine,liver,lung,meninges,oesophagus,ovary,pancreas,parathyroid,penis,peritoneum,pituitary,pleura,prostate,salivary_gland,skin,small_intestine,soft_tissue,stomach,thymus,thyroid,upper_aerodigestiv…	Phosphoinositide 3-kinase, accessory (PIK) domain (3);Armadillo-type fold (1);	PI3K,PIK3CA	1.50811e-05	MODERATE	missense_variant	0.998
chr3	178936091	G	A	MAH_BTN-068	PIK3CA	ENSP00000263967:p.E545K,NP_006209.2:p.E545K	EVEROLIMUS,TEMSIROLIMUS	FDA Approved,FDA Approved					PI3K inhibitors, AKT inhibitors , mTOR inhibitors	PI3K	Breast, colorectal, endometrial cancer		Mutation or amplification	1	1	KEEP		Somatic	0.00027081	0.00027081	COSM125370,COSM763,COSM125370,COSM763,COSM125370,COSM763	6117	31	...,NS,biliary_tract,breast,central_nervous_system,cervix,endometrium,gastrointestinal_tract_(site_indeterminate),haematopoietic_and_lymphoid_tissue,kidney,large_intestine,liver,lung,oesophagus,ovary,pancreas,parathyroid,penis,peritoneum,pituitary,prostate,salivary_gland,skin,small_intestine,soft_tissue,stomach,thymus,thyroid,upper_aerodigestive_tract,urinary_tract,vulva	10535	1027	36	NS,autonomic_ganglia,biliary_tract,bone,breast,central_nervous_system,cervix,endometrium,eye,gastrointestinal_tract_(site_indeterminate),genital_tract,haematopoietic_and_lymphoid_tissue,kidney,large_intestine,liver,lung,meninges,oesophagus,ovary,pancreas,parathyroid,penis,peritoneum,pituitary,pleura,prostate,salivary_gland,skin,small_intestine,soft_tissue,stomach,thymus,thyroid,upper_aerodigestiv…	Phosphoinositide 3-kinase, accessory (PIK) domain (3);Armadillo-type fold (1);	PI3K,PIK3CA	1.50811e-05	MODERATE	missense_variant	0.998
chr3	178941879	A	G	MAH_BTN-074	PIK3CA	NP_006209.2:p.K733R,ENSP00000263967:p.K733R	EVEROLIMUS,TEMSIROLIMUS	FDA Approved,FDA Approved					PI3K inhibitors, AKT inhibitors , mTOR inhibitors	PI3K	Breast, colorectal, endometrial cancer		Mutation or amplification	1	1	KEEP		Somatic	1.5964e-18	1.5964e-18	COSM1566569,COSM6148,COSM1566569,COSM6148,COSM1566569,COSM6148	9	2	bone,large_intestine	10535	1027	36	NS,autonomic_ganglia,biliary_tract,bone,breast,central_nervous_system,cervix,endometrium,eye,gastrointestinal_tract_(site_indeterminate),genital_tract,haematopoietic_and_lymphoid_tissue,kidney,large_intestine,liver,lung,meninges,oesophagus,ovary,pancreas,parathyroid,penis,peritoneum,pituitary,pleura,prostate,salivary_gland,skin,small_intestine,soft_tissue,stomach,thymus,thyroid,upper_aerodigestiv…	Protein kinase-like domain (1);	PI3K,PIK3CA	0.00593161	MODERATE	missense_variant	0.955
chr3	178941879	A	G	MAH_R17017891LU01	PIK3CA	NP_006209.2:p.K733R,ENSP00000263967:p.K733R	EVEROLIMUS,TEMSIROLIMUS	FDA Approved,FDA Approved					PI3K inhibitors, AKT inhibitors , mTOR inhibitors	PI3K	Breast, colorectal, endometrial cancer		Mutation or amplification	1	1	KEEP		Somatic	8.864600148432729E-17	8.864600148432729E-17	COSM1566569,COSM6148,COSM1566569,COSM6148,COSM1566569,COSM6148	9	2	bone,large_intestine	10789	1054	36	NS,autonomic_ganglia,biliary_tract,bone,breast,central_nervous_system,cervix,endometrium,eye,gastrointestinal_tract_(site_indeterminate),genital_tract,haematopoietic_and_lymphoid_tissue,kidney,large_intestine,liver,lung,meninges,oesophagus,ovary,pancreas,parathyroid,penis,peritoneum,pituitary,pleura,prostate,salivary_gland,skin,small_intestine,soft_tissue,stomach,thymus,thyroid,upper_aerodigestiv…	Protein kinase-like domain (1);	PIK3CA,PI3K	0.006234410218894482	MODERATE	missense_variant	0.9549999833106995
chr3	178941879	A	G	MAH_R17017893LU01	PIK3CA	NP_006209.2:p.K733R,ENSP00000263967:p.K733R	EVEROLIMUS,TEMSIROLIMUS	FDA Approved,FDA Approved					PI3K inhibitors, AKT inhibitors , mTOR inhibitors	PI3K	Breast, colorectal, endometrial cancer		Mutation or amplification	1	1	KEEP		Somatic	6.403400032439777E-9	6.403400032439777E-9	COSM1566569,COSM6148,COSM1566569,COSM6148,COSM1566569,COSM6148	9	2	bone,large_intestine	10789	1054	36	NS,autonomic_ganglia,biliary_tract,bone,breast,central_nervous_system,cervix,endometrium,eye,gastrointestinal_tract_(site_indeterminate),genital_tract,haematopoietic_and_lymphoid_tissue,kidney,large_intestine,liver,lung,meninges,oesophagus,ovary,pancreas,parathyroid,penis,peritoneum,pituitary,pleura,prostate,salivary_gland,skin,small_intestine,soft_tissue,stomach,thymus,thyroid,upper_aerodigestiv…	Protein kinase-like domain (1);	PIK3CA,PI3K	0.006234410218894482	MODERATE	missense_variant	0.9549999833106995
chr3	178941879	A	G	MAH_R17017908LU01	PIK3CA	NP_006209.2:p.K733R,ENSP00000263967:p.K733R	EVEROLIMUS,TEMSIROLIMUS	FDA Approved,FDA Approved					PI3K inhibitors, AKT inhibitors , mTOR inhibitors	PI3K	Breast, colorectal, endometrial cancer		Mutation or amplification	1	1	KEEP		Somatic	1.8007999535996078E-9	1.8007999535996078E-9	COSM1566569,COSM6148,COSM1566569,COSM6148,COSM1566569,COSM6148	9	2	bone,large_intestine	10789	1054	36	NS,autonomic_ganglia,biliary_tract,bone,breast,central_nervous_system,cervix,endometrium,eye,gastrointestinal_tract_(site_indeterminate),genital_tract,haematopoietic_and_lymphoid_tissue,kidney,large_intestine,liver,lung,meninges,oesophagus,ovary,pancreas,parathyroid,penis,peritoneum,pituitary,pleura,prostate,salivary_gland,skin,small_intestine,soft_tissue,stomach,thymus,thyroid,upper_aerodigestiv…	Protein kinase-like domain (1);	PIK3CA,PI3K	0.006234410218894482	MODERATE	missense_variant	0.9549999833106995
chr3	178952085	A	G	MAH_R17017888LU01	PIK3CA	NP_006209.2:p.H1047R,ENSP00000263967:p.H1047R	EVEROLIMUS,TEMSIROLIMUS	FDA Approved,FDA Approved					PI3K inhibitors, AKT inhibitors , mTOR inhibitors	PI3K	Breast, colorectal, endometrial cancer		Mutation or amplification	1	1	KEEP		Somatic	9.703599914624608E-16	9.703599914624608E-16	COSM775,COSM94986,COSM775,COSM94986,COSM775,COSM94986,COSM775,COSM94986	11040	28	NS,biliary_tract,bone,breast,central_nervous_system,cervix,endometrium,gastrointestinal_tract_(site_indeterminate),haematopoietic_and_lymphoid_tissue,kidney,large_intest...,large_intestine,liver,lung,meninges,oesophagus,ovary,pancreas,pituitary,prostate,salivary_gland,skin,small_intestine,soft_tissue,stomach,thyroid,upper_aerodigestive_tract,urinary_tract	10789	1054	36	NS,autonomic_ganglia,biliary_tract,bone,breast,central_nervous_system,cervix,endometrium,eye,gastrointestinal_tract_(site_indeterminate),genital_tract,haematopoietic_and_lymphoid_tissue,kidney,large_intestine,liver,lung,meninges,oesophagus,ovary,pancreas,parathyroid,penis,peritoneum,pituitary,pleura,prostate,salivary_gland,skin,small_intestine,soft_tissue,stomach,thymus,thyroid,upper_aerodigestiv…	Protein kinase-like domain (1);Phosphatidylinositol 3-/4-kinase, catalytic (3);	PIK3CA,PI3K	9.040119948622305E-6	MODERATE	missense_variant	0.9810000061988831
chr3	178952085	A	G	MAH_R17017913LU01	PIK3CA	NP_006209.2:p.H1047R,ENSP00000263967:p.H1047R	EVEROLIMUS,TEMSIROLIMUS	FDA Approved,FDA Approved					PI3K inhibitors, AKT inhibitors , mTOR inhibitors	PI3K	Breast, colorectal, endometrial cancer		Mutation or amplification	1	1	KEEP		Somatic	1.0746999956623426E-9	1.0746999956623426E-9	COSM775,COSM94986,COSM775,COSM94986,COSM775,COSM94986,COSM775,COSM94986	11040	28	NS,biliary_tract,bone,breast,central_nervous_system,cervix,endometrium,gastrointestinal_tract_(site_indeterminate),haematopoietic_and_lymphoid_tissue,kidney,large_intest...,large_intestine,liver,lung,meninges,oesophagus,ovary,pancreas,pituitary,prostate,salivary_gland,skin,small_intestine,soft_tissue,stomach,thyroid,upper_aerodigestive_tract,urinary_tract	10789	1054	36	NS,autonomic_ganglia,biliary_tract,bone,breast,central_nervous_system,cervix,endometrium,eye,gastrointestinal_tract_(site_indeterminate),genital_tract,haematopoietic_and_lymphoid_tissue,kidney,large_intestine,liver,lung,meninges,oesophagus,ovary,pancreas,parathyroid,penis,peritoneum,pituitary,pleura,prostate,salivary_gland,skin,small_intestine,soft_tissue,stomach,thymus,thyroid,upper_aerodigestiv…	Protein kinase-like domain (1);Phosphatidylinositol 3-/4-kinase, catalytic (3);	PIK3CA,PI3K	9.040119948622305E-6	MODERATE	missense_variant	0.9810000061988831
chr3	178952085	A	G	MAH_R17017910LU01	PIK3CA	NP_006209.2:p.H1047R,ENSP00000263967:p.H1047R	EVEROLIMUS,TEMSIROLIMUS	FDA Approved,FDA Approved					PI3K inhibitors, AKT inhibitors , mTOR inhibitors	PI3K	Breast, colorectal, endometrial cancer		Mutation or amplification	1	1	KEEP		Somatic	3.8477998520426835E-21	3.8477998520426835E-21	COSM775,COSM94986,COSM775,COSM94986,COSM775,COSM94986,COSM775,COSM94986	11040	28	NS,biliary_tract,bone,breast,central_nervous_system,cervix,endometrium,gastrointestinal_tract_(site_indeterminate),haematopoietic_and_lymphoid_tissue,kidney,large_intest...,large_intestine,liver,lung,meninges,oesophagus,ovary,pancreas,pituitary,prostate,salivary_gland,skin,small_intestine,soft_tissue,stomach,thyroid,upper_aerodigestive_tract,urinary_tract	10789	1054	36	NS,autonomic_ganglia,biliary_tract,bone,breast,central_nervous_system,cervix,endometrium,eye,gastrointestinal_tract_(site_indeterminate),genital_tract,haematopoietic_and_lymphoid_tissue,kidney,large_intestine,liver,lung,meninges,oesophagus,ovary,pancreas,parathyroid,penis,peritoneum,pituitary,pleura,prostate,salivary_gland,skin,small_intestine,soft_tissue,stomach,thymus,thyroid,upper_aerodigestiv…	Protein kinase-like domain (1);Phosphatidylinositol 3-/4-kinase, catalytic (3);	PIK3CA,PI3K	9.040119948622305E-6	MODERATE	missense_variant	0.9810000061988831
chr3	178952085	A	G	MAH_R17017893LU01	PIK3CA	NP_006209.2:p.H1047R,ENSP00000263967:p.H1047R	EVEROLIMUS,TEMSIROLIMUS	FDA Approved,FDA Approved					PI3K inhibitors, AKT inhibitors , mTOR inhibitors	PI3K	Breast, colorectal, endometrial cancer		Mutation or amplification	1	1	KEEP		Somatic	1.3916000513383708E-13	1.3916000513383708E-13	COSM775,COSM94986,COSM775,COSM94986,COSM775,COSM94986,COSM775,COSM94986	11040	28	NS,biliary_tract,bone,breast,central_nervous_system,cervix,endometrium,gastrointestinal_tract_(site_indeterminate),haematopoietic_and_lymphoid_tissue,kidney,large_intest...,large_intestine,liver,lung,meninges,oesophagus,ovary,pancreas,pituitary,prostate,salivary_gland,skin,small_intestine,soft_tissue,stomach,thyroid,upper_aerodigestive_tract,urinary_tract	10789	1054	36	NS,autonomic_ganglia,biliary_tract,bone,breast,central_nervous_system,cervix,endometrium,eye,gastrointestinal_tract_(site_indeterminate),genital_tract,haematopoietic_and_lymphoid_tissue,kidney,large_intestine,liver,lung,meninges,oesophagus,ovary,pancreas,parathyroid,penis,peritoneum,pituitary,pleura,prostate,salivary_gland,skin,small_intestine,soft_tissue,stomach,thymus,thyroid,upper_aerodigestiv…	Protein kinase-like domain (1);Phosphatidylinositol 3-/4-kinase, catalytic (3);	PIK3CA,PI3K	9.040119948622305E-6	MODERATE	missense_variant	0.9810000061988831

## Sheet: BRCA1
Chrom	Pos	Reference	Call	PN	Gene_symbol	COSMIC_HGVSp	Drug_Gene	Drug_Gene_ApprovalStatus	Drug_Pathway	Drug_Pathway_ApprovalStatus	Drug_SourcePathway	Drug_Mechanism_of_Action	Gene_ActionableDrugClasses	Gene_ActionablePathways	Gene_ActionableTumors	ResistancexSensitivity_Variants	Gene_ActionableMutations	caller_both	caller_either	mutect_judgement	mutect_failure_reasons	varscan2_somatic_status	varscan2_somatic_p_value	varscan2_variant_p_value	COSMIC_IDs	COSMIC_count_vars	COSMIC_pscount	COSMIC_primarysites	COSMIC_count_varsInGene	COSMIC_count_lociInGene	COSMIC_count_primarysitesInGene	COSMIC_primarysitesInGene	dbNSFP_Interpro_domain	GENE_Aliases	VEP_Max_Af	VEP_Max_Impact	VEP_max_consequence	VEP_max_score
chr17	41246404	C	T	MAH_BTN-002	BRCA1	ENSP00000418960:p.V382I,ENSP00000350283:p.V382I	CARBOPLATIN,OLAPARIB	FDA Approved,FDA Approved					PARP inhibitors		Advanced or metastatic ovarian cancer and breast cancer		Biallelic Inactivation	1	1	KEEP		Somatic	5.9484e-22	5.9484e-22		null	null		1123	823	26	NS,biliary_tract,bone,breast,central_nervous_system,cervix,endometrium,haematopoietic_and_lymphoid_tissue,kidney,large_intestine,liver,lung,meninges,oesophagus,ovary,pancreas,prostate,salivary_gland,skin,small_intestine,soft_tissue,stomach,thymus,thyroid,upper_aerodigestive_tract,urinary_tract		BRCA1,BRCC1,FANCS,PPP1R53,RNF53	0	MODERATE	missense_variant	1
chr17	41209133	C	G	MAH_BTN-006	BRCA1	ENSP00000350283:p.G1738A,ENSP00000418960:p.G1759A	CARBOPLATIN,OLAPARIB	FDA Approved,FDA Approved					PARP inhibitors		Advanced or metastatic ovarian cancer and breast cancer		Biallelic Inactivation	1	1	KEEP		Somatic	1.1285e-05	1.1285e-05		null	null		1123	823	26	NS,biliary_tract,bone,breast,central_nervous_system,cervix,endometrium,haematopoietic_and_lymphoid_tissue,kidney,large_intestine,liver,lung,meninges,oesophagus,ovary,pancreas,prostate,salivary_gland,skin,small_intestine,soft_tissue,stomach,thymus,thyroid,upper_aerodigestive_tract,urinary_tract	BRCT (1);	BRCA1,BRCC1,FANCS,PPP1R53,RNF53	0	MODERATE	missense_variant	1
chr17	41245262	T	A	MAH_BTN-007	BRCA1	ENSP00000418960:p.R762S,ENSP00000350283:p.R762S	CARBOPLATIN,OLAPARIB	FDA Approved,FDA Approved					PARP inhibitors		Advanced or metastatic ovarian cancer and breast cancer		Biallelic Inactivation	1	1	KEEP		Somatic	2.4827e-23	2.4827e-23		null	null		1123	823	26	NS,biliary_tract,bone,breast,central_nervous_system,cervix,endometrium,haematopoietic_and_lymphoid_tissue,kidney,large_intestine,liver,lung,meninges,oesophagus,ovary,pancreas,prostate,salivary_gland,skin,small_intestine,soft_tissue,stomach,thymus,thyroid,upper_aerodigestive_tract,urinary_tract		BRCA1,BRCC1,FANCS,PPP1R53,RNF53	0.0015022	MODERATE	missense_variant	0.993
chr17	41242980	C	T	MAH_BTN-009	BRCA1	ENSP00000350283:p.S1389N,ENSP00000418960:p.S1389N	CARBOPLATIN,OLAPARIB	FDA Approved,FDA Approved					PARP inhibitors		Advanced or metastatic ovarian cancer and breast cancer		Biallelic Inactivation	1	1	KEEP		Somatic	9.5212e-22	9.5212e-22		null	null		1123	823	26	NS,biliary_tract,bone,breast,central_nervous_system,cervix,endometrium,haematopoietic_and_lymphoid_tissue,kidney,large_intestine,liver,lung,meninges,oesophagus,ovary,pancreas,prostate,salivary_gland,skin,small_intestine,soft_tissue,stomach,thymus,thyroid,upper_aerodigestive_tract,urinary_tract		BRCA1,BRCC1,FANCS,PPP1R53,RNF53	0.002	MODERATE	missense_variant	0.994
chr17	41243809	C	T	MAH_BTN-014	BRCA1	ENSP00000350283:p.V1247I,ENSP00000418960:p.V1247I	CARBOPLATIN,OLAPARIB	FDA Approved,FDA Approved					PARP inhibitors		Advanced or metastatic ovarian cancer and breast cancer		Biallelic Inactivation	1	1	KEEP		Somatic	0.0015753	0.0015753	COSM1383507,COSM4948850,COSM1383507,COSM4948850,COSM1383507,COSM4948850	6	1	large_intestine	1123	823	26	NS,biliary_tract,bone,breast,central_nervous_system,cervix,endometrium,haematopoietic_and_lymphoid_tissue,kidney,large_intestine,liver,lung,meninges,oesophagus,ovary,pancreas,prostate,salivary_gland,skin,small_intestine,soft_tissue,stomach,thymus,thyroid,upper_aerodigestive_tract,urinary_tract		BRCA1,BRCC1,FANCS,PPP1R53,RNF53	0.003	MODERATE	missense_variant	0.154
chr17	41197776	C	A	MAH_BTN-018	BRCA1	ENSP00000350283:p.W1837C,ENSP00000418960:p.W1858C	CARBOPLATIN,OLAPARIB	FDA Approved,FDA Approved					PARP inhibitors		Advanced or metastatic ovarian cancer and breast cancer		Biallelic Inactivation	1	1	KEEP		Somatic	3.159e-32	3.159e-32		null	null		1123	823	26	NS,biliary_tract,bone,breast,central_nervous_system,cervix,endometrium,haematopoietic_and_lymphoid_tissue,kidney,large_intestine,liver,lung,meninges,oesophagus,ovary,pancreas,prostate,salivary_gland,skin,small_intestine,soft_tissue,stomach,thymus,thyroid,upper_aerodigestive_tract,urinary_tract	BRCT (4);	BRCA1,BRCC1,FANCS,PPP1R53,RNF53	0	MODERATE	missense_variant	1
chr17	41244499	C	A	MAH_BTN-022	BRCA1	ENSP00000350283:p.E1017*,ENSP00000418960:p.E1017*	CARBOPLATIN,OLAPARIB	FDA Approved,FDA Approved					PARP inhibitors		Advanced or metastatic ovarian cancer and breast cancer		Biallelic Inactivation	1	1	KEEP		Somatic	7.413e-21	7.413e-21		null	null		1123	823	26	NS,biliary_tract,bone,breast,central_nervous_system,cervix,endometrium,haematopoietic_and_lymphoid_tissue,kidney,large_intestine,liver,lung,meninges,oesophagus,ovary,pancreas,prostate,salivary_gland,skin,small_intestine,soft_tissue,stomach,thymus,thyroid,upper_aerodigestive_tract,urinary_tract		BRCA1,BRCC1,FANCS,PPP1R53,RNF53	0	HIGH	stop_gained	0
chr17	41243479	CTTGA	C	MAH_BTN-029	BRCA1	ENSP00000350283:p.NQ1355-1356X,ENSP00000418960:p.NQ1355-1356X	CARBOPLATIN,OLAPARIB	FDA Approved,FDA Approved					PARP inhibitors		Advanced or metastatic ovarian cancer and breast cancer		Biallelic Inactivation	0	1			Somatic	5.6371e-17	5.6371e-17		null	null		1123	823	26	NS,biliary_tract,bone,breast,central_nervous_system,cervix,endometrium,haematopoietic_and_lymphoid_tissue,kidney,large_intestine,liver,lung,meninges,oesophagus,ovary,pancreas,prostate,salivary_gland,skin,small_intestine,soft_tissue,stomach,thymus,thyroid,upper_aerodigestive_tract,urinary_tract		BRCA1,BRCC1,FANCS,PPP1R53,RNF53	6.0584e-05	HIGH	frameshift_variant	0
chr17	41199674	T	C	MAH_BTN-031	BRCA1	ENSP00000350283:p.D1818G,ENSP00000418960:p.D1839G	CARBOPLATIN,OLAPARIB	FDA Approved,FDA Approved					PARP inhibitors		Advanced or metastatic ovarian cancer and breast cancer		Biallelic Inactivation	1	1	KEEP		Somatic	6.6356e-35	6.6356e-35		null	null		1123	823	26	NS,biliary_tract,bone,breast,central_nervous_system,cervix,endometrium,haematopoietic_and_lymphoid_tissue,kidney,large_intestine,liver,lung,meninges,oesophagus,ovary,pancreas,prostate,salivary_gland,skin,small_intestine,soft_tissue,stomach,thymus,thyroid,upper_aerodigestive_tract,urinary_tract	BRCT (4);	BRCA1,BRCC1,FANCS,PPP1R53,RNF53	0	MODERATE	missense_variant	0.753
chr17	41242980	C	T	MAH_BTN-039	BRCA1	ENSP00000350283:p.S1389N,ENSP00000418960:p.S1389N	CARBOPLATIN,OLAPARIB	FDA Approved,FDA Approved					PARP inhibitors		Advanced or metastatic ovarian cancer and breast cancer		Biallelic Inactivation	1	1	KEEP		Somatic	4.8148e-22	4.8148e-22		null	null		1123	823	26	NS,biliary_tract,bone,breast,central_nervous_system,cervix,endometrium,haematopoietic_and_lymphoid_tissue,kidney,large_intestine,liver,lung,meninges,oesophagus,ovary,pancreas,prostate,salivary_gland,skin,small_intestine,soft_tissue,stomach,thymus,thyroid,upper_aerodigestive_tract,urinary_tract		BRCA1,BRCC1,FANCS,PPP1R53,RNF53	0.002	MODERATE	missense_variant	0.994
chr17	41244579	A	G	MAH_BTN-042	BRCA1	ENSP00000418960:p.V990A,ENSP00000350283:p.V990A	CARBOPLATIN,OLAPARIB	FDA Approved,FDA Approved					PARP inhibitors		Advanced or metastatic ovarian cancer and breast cancer		Biallelic Inactivation	1	1	KEEP		Somatic	1.3095e-14	1.3095e-14		null	null		1123	823	26	NS,biliary_tract,bone,breast,central_nervous_system,cervix,endometrium,haematopoietic_and_lymphoid_tissue,kidney,large_intestine,liver,lung,meninges,oesophagus,ovary,pancreas,prostate,salivary_gland,skin,small_intestine,soft_tissue,stomach,thymus,thyroid,upper_aerodigestive_tract,urinary_tract		BRCA1,BRCC1,FANCS,PPP1R53,RNF53	0.002331	MODERATE	missense_variant	0.984
chr17	41243776	CCT	C	MAH_BTN-044	BRCA1	ENSP00000350283:p.TE1256-1257TX,ENSP00000418960:p.TE1256-1257TX	CARBOPLATIN,OLAPARIB	FDA Approved,FDA Approved					PARP inhibitors		Advanced or metastatic ovarian cancer and breast cancer		Biallelic Inactivation	0	1			Somatic	5.60519e-45	5.60519e-45		null	null		1123	823	26	NS,biliary_tract,bone,breast,central_nervous_system,cervix,endometrium,haematopoietic_and_lymphoid_tissue,kidney,large_intestine,liver,lung,meninges,oesophagus,ovary,pancreas,prostate,salivary_gland,skin,small_intestine,soft_tissue,stomach,thymus,thyroid,upper_aerodigestive_tract,urinary_tract		BRCA1,BRCC1,FANCS,PPP1R53,RNF53	1.49844e-05	HIGH	frameshift_variant	0
chr17	41244526	T	C	MAH_BTN-050	BRCA1	ENSP00000350283:p.M1008V,ENSP00000418960:p.M1008V	CARBOPLATIN,OLAPARIB	FDA Approved,FDA Approved					PARP inhibitors		Advanced or metastatic ovarian cancer and breast cancer		Biallelic Inactivation	1	1	KEEP		Somatic	2.3419e-08	2.3419e-08		null	null		1123	823	26	NS,biliary_tract,bone,breast,central_nervous_system,cervix,endometrium,haematopoietic_and_lymphoid_tissue,kidney,large_intestine,liver,lung,meninges,oesophagus,ovary,pancreas,prostate,salivary_gland,skin,small_intestine,soft_tissue,stomach,thymus,thyroid,upper_aerodigestive_tract,urinary_tract		BRCA1,BRCC1,FANCS,PPP1R53,RNF53	0.00244188	MODERATE	missense_variant	0.001
chr17	41246725	C	T	MAH_BTN-052	BRCA1	ENSP00000418960:p.G275S,ENSP00000350283:p.G275S	CARBOPLATIN,OLAPARIB	FDA Approved,FDA Approved					PARP inhibitors		Advanced or metastatic ovarian cancer and breast cancer		Biallelic Inactivation	1	1	KEEP		Somatic	0	0		null	null		1123	823	26	NS,biliary_tract,bone,breast,central_nervous_system,cervix,endometrium,haematopoietic_and_lymphoid_tissue,kidney,large_intestine,liver,lung,meninges,oesophagus,ovary,pancreas,prostate,salivary_gland,skin,small_intestine,soft_tissue,stomach,thymus,thyroid,upper_aerodigestive_tract,urinary_tract		BRCA1,BRCC1,FANCS,PPP1R53,RNF53	0.00496324	MODERATE	missense_variant	0.997
chr17	41242980	C	T	MAH_BTN-066	BRCA1	ENSP00000350283:p.S1389N,ENSP00000418960:p.S1389N	CARBOPLATIN,OLAPARIB	FDA Approved,FDA Approved					PARP inhibitors		Advanced or metastatic ovarian cancer and breast cancer		Biallelic Inactivation	1	1	KEEP		Somatic	2.4613e-05	2.4613e-05		null	null		1123	823	26	NS,biliary_tract,bone,breast,central_nervous_system,cervix,endometrium,haematopoietic_and_lymphoid_tissue,kidney,large_intestine,liver,lung,meninges,oesophagus,ovary,pancreas,prostate,salivary_gland,skin,small_intestine,soft_tissue,stomach,thymus,thyroid,upper_aerodigestive_tract,urinary_tract		BRCA1,BRCC1,FANCS,PPP1R53,RNF53	0.002	MODERATE	missense_variant	0.994
chr17	41245706	C	A	MAH_BTN-073	BRCA1	ENSP00000418960:p.K614N,ENSP00000350283:p.K614N	CARBOPLATIN,OLAPARIB	FDA Approved,FDA Approved					PARP inhibitors		Advanced or metastatic ovarian cancer and breast cancer		Biallelic Inactivation	1	1	KEEP		Somatic	5.1909e-05	5.1909e-05		null	null		1123	823	26	NS,biliary_tract,bone,breast,central_nervous_system,cervix,endometrium,haematopoietic_and_lymphoid_tissue,kidney,large_intestine,liver,lung,meninges,oesophagus,ovary,pancreas,prostate,salivary_gland,skin,small_intestine,soft_tissue,stomach,thymus,thyroid,upper_aerodigestive_tract,urinary_tract		BRCA1,BRCC1,FANCS,PPP1R53,RNF53	6.05694e-05	MODERATE	missense_variant	1
chr17	41197749	CTGG	C	MAH_BTN-077	BRCA1	ENSP00000350283:p.YQ1845-1846*,ENSP00000418960:p.YQ1866-1867*	CARBOPLATIN,OLAPARIB	FDA Approved,FDA Approved					PARP inhibitors		Advanced or metastatic ovarian cancer and breast cancer		Biallelic Inactivation	0	1			Somatic	2.9522e-11	2.9522e-11		null	null		1123	823	26	NS,biliary_tract,bone,breast,central_nervous_system,cervix,endometrium,haematopoietic_and_lymphoid_tissue,kidney,large_intestine,liver,lung,meninges,oesophagus,ovary,pancreas,prostate,salivary_gland,skin,small_intestine,soft_tissue,stomach,thymus,thyroid,upper_aerodigestive_tract,urinary_tract		BRCA1,BRCC1,FANCS,PPP1R53,RNF53	0	HIGH	stop_gained	0
chr17	41243952	G	A	MAH_BTN-078	BRCA1	ENSP00000350283:p.A1199V,ENSP00000418960:p.A1199V	CARBOPLATIN,OLAPARIB	FDA Approved,FDA Approved					PARP inhibitors		Advanced or metastatic ovarian cancer and breast cancer		Biallelic Inactivation	1	1	KEEP		Somatic	2.9698e-22	2.9698e-22		null	null		1123	823	26	NS,biliary_tract,bone,breast,central_nervous_system,cervix,endometrium,haematopoietic_and_lymphoid_tissue,kidney,large_intestine,liver,lung,meninges,oesophagus,ovary,pancreas,prostate,salivary_gland,skin,small_intestine,soft_tissue,stomach,thymus,thyroid,upper_aerodigestive_tract,urinary_tract		BRCA1,BRCC1,FANCS,PPP1R53,RNF53	0.000471254	MODERATE	missense_variant	0.537
chr17	41226530	G	A	MAH_BTN-079	BRCA1	ENSP00000350283:p.P1498L,ENSP00000418960:p.P1519L	CARBOPLATIN,OLAPARIB	FDA Approved,FDA Approved					PARP inhibitors		Advanced or metastatic ovarian cancer and breast cancer		Biallelic Inactivation	0	1	KEEP			null	null		null	null		1123	823	26	NS,biliary_tract,bone,breast,central_nervous_system,cervix,endometrium,haematopoietic_and_lymphoid_tissue,kidney,large_intestine,liver,lung,meninges,oesophagus,ovary,pancreas,prostate,salivary_gland,skin,small_intestine,soft_tissue,stomach,thymus,thyroid,upper_aerodigestive_tract,urinary_tract		BRCA1,BRCC1,FANCS,PPP1R53,RNF53	0	MODERATE	missense_variant	0.267
chr17	41197776	C	A	MAH_BTN-082	BRCA1	ENSP00000350283:p.W1837C,ENSP00000418960:p.W1858C	CARBOPLATIN,OLAPARIB	FDA Approved,FDA Approved					PARP inhibitors		Advanced or metastatic ovarian cancer and breast cancer		Biallelic Inactivation	1	1	KEEP		Somatic	4.2492e-34	4.2492e-34		null	null		1123	823	26	NS,biliary_tract,bone,breast,central_nervous_system,cervix,endometrium,haematopoietic_and_lymphoid_tissue,kidney,large_intestine,liver,lung,meninges,oesophagus,ovary,pancreas,prostate,salivary_gland,skin,small_intestine,soft_tissue,stomach,thymus,thyroid,upper_aerodigestive_tract,urinary_tract	BRCT (4);	BRCA1,BRCC1,FANCS,PPP1R53,RNF53	0	MODERATE	missense_variant	1
chr17	41244333	AG	A	MAH_R17017894LU01	BRCA1	ENSP00000350283:p.L1072X,ENSP00000418960:p.L1072X	CARBOPLATIN,OLAPARIB	FDA Approved,FDA Approved					PARP inhibitors		Advanced or metastatic ovarian cancer and breast cancer		Biallelic Inactivation	0	1			Somatic	2.9854000181297384E-34	2.9854000181297384E-34		null	null		1151	846	26	NS,biliary_tract,bone,breast,central_nervous_system,cervix,endometrium,haematopoietic_and_lymphoid_tissue,kidney,large_intestine,liver,lung,meninges,oesophagus,ovary,pancreas,prostate,salivary_gland,skin,small_intestine,soft_tissue,stomach,thymus,thyroid,upper_aerodigestive_tract,urinary_tract		BRCA1,RNF53,BRCC1,PPP1R53,FANCS	0.0	HIGH	frameshift_variant	0.0
chr17	41245122	T	C	MAH_R17017902LU01	BRCA1	ENSP00000418960:p.E809G,ENSP00000350283:p.E809G	CARBOPLATIN,OLAPARIB	FDA Approved,FDA Approved					PARP inhibitors		Advanced or metastatic ovarian cancer and breast cancer		Biallelic Inactivation	1	1	KEEP		Somatic	0.0	0.0	COSM148279,COSM4782351	2	1	stomach	1151	846	26	NS,biliary_tract,bone,breast,central_nervous_system,cervix,endometrium,haematopoietic_and_lymphoid_tissue,kidney,large_intestine,liver,lung,meninges,oesophagus,ovary,pancreas,prostate,salivary_gland,skin,small_intestine,soft_tissue,stomach,thymus,thyroid,upper_aerodigestive_tract,urinary_tract		BRCA1,RNF53,BRCC1,PPP1R53,FANCS	5.85137982852757E-4	MODERATE	missense_variant	0.10100000351667404
chr17	41246039	CTTTAA	C	MAH_R17017897LU01	BRCA1	ENSP00000418960:p.NKL500-502NX,ENSP00000350283:p.NKL500-502NX	CARBOPLATIN,OLAPARIB	FDA Approved,FDA Approved					PARP inhibitors		Advanced or metastatic ovarian cancer and breast cancer		Biallelic Inactivation	0	1			Somatic	2.939400025464556E-12	2.939400025464556E-12	COSM5702554,COSM5702555	2	1	ovary	1151	846	26	NS,biliary_tract,bone,breast,central_nervous_system,cervix,endometrium,haematopoietic_and_lymphoid_tissue,kidney,large_intestine,liver,lung,meninges,oesophagus,ovary,pancreas,prostate,salivary_gland,skin,small_intestine,soft_tissue,stomach,thymus,thyroid,upper_aerodigestive_tract,urinary_tract		BRCA1,RNF53,BRCC1,PPP1R53,FANCS	6.501110328827053E-5	HIGH	frameshift_variant	0.0
chr17	41256900	C	CA	MAH_R17017896LU01	BRCA1	ENSP00000350283:p.-95-96X,ENSP00000418960:p.-95-96X	CARBOPLATIN,OLAPARIB	FDA Approved,FDA Approved					PARP inhibitors		Advanced or metastatic ovarian cancer and breast cancer		Biallelic Inactivation	0	1			Somatic	2.2367000612755206E-11	2.2367000612755206E-11		null	null		1151	846	26	NS,biliary_tract,bone,breast,central_nervous_system,cervix,endometrium,haematopoietic_and_lymphoid_tissue,kidney,large_intestine,liver,lung,meninges,oesophagus,ovary,pancreas,prostate,salivary_gland,skin,small_intestine,soft_tissue,stomach,thymus,thyroid,upper_aerodigestive_tract,urinary_tract		BRCA1,RNF53,BRCC1,PPP1R53,FANCS	0.0	HIGH	frameshift_variant	0.0
chr17	41276033	C	A	MAH_R17017890LU01	BRCA1	ENSP00000418960:p.,ENSP00000350283:p.	CARBOPLATIN,OLAPARIB	FDA Approved,FDA Approved					PARP inhibitors		Advanced or metastatic ovarian cancer and breast cancer		Biallelic Inactivation	1	1	KEEP		Somatic	4.932900199428047E-10	4.932900199428047E-10	COSM3734724	1	1	ovary	1151	846	26	NS,biliary_tract,bone,breast,central_nervous_system,cervix,endometrium,haematopoietic_and_lymphoid_tissue,kidney,large_intestine,liver,lung,meninges,oesophagus,ovary,pancreas,prostate,salivary_gland,skin,small_intestine,soft_tissue,stomach,thymus,thyroid,upper_aerodigestive_tract,urinary_tract		BRCA1,RNF53,BRCC1,PPP1R53,FANCS	0.0	HIGH	splice_donor_variant	0.0

## Sheet: BRCA2
Chrom	Pos	Reference	Call	PN	Gene_symbol	COSMIC_HGVSp	Drug_Gene	Drug_Gene_ApprovalStatus	Drug_Pathway	Drug_Pathway_ApprovalStatus	Drug_SourcePathway	Drug_Mechanism_of_Action	Gene_ActionableDrugClasses	Gene_ActionablePathways	Gene_ActionableTumors	ResistancexSensitivity_Variants	Gene_ActionableMutations	caller_both	caller_either	mutect_judgement	mutect_failure_reasons	varscan2_somatic_status	varscan2_somatic_p_value	varscan2_variant_p_value	COSMIC_IDs	COSMIC_count_vars	COSMIC_pscount	COSMIC_primarysites	COSMIC_count_varsInGene	COSMIC_count_lociInGene	COSMIC_count_primarysitesInGene	COSMIC_primarysitesInGene	dbNSFP_Interpro_domain	GENE_Aliases	VEP_Max_Af	VEP_Max_Impact	VEP_max_consequence	VEP_max_score
chr13	32911822	A	C	MAH_BTN-001	BRCA2	ENSP00000369497:p.E1110D,ENSP00000439902:p.E1110D	OLAPARIB	FDA Approved					PARP inhibitors		Advanced or metastatic ovarian cancer and breast cancer		Biallelic Inactivation	1	1	KEEP		Somatic	6.4034e-09	6.4034e-09		null	null		1830	1508	29	NS,adrenal_gland,autonomic_ganglia,biliary_tract,bone,breast,central_nervous_system,cervix,endometrium,eye,haematopoietic_and_lymphoid_tissue,kidney,large_intestine,liver,lung,oesophagus,ovary,pancreas,peritoneum,pituitary,prostate,salivary_gland,skin,small_intestine,soft_tissue,stomach,thyroid,upper_aerodigestive_tract,urinary_tract		BRCA2,BRCC2,FACD,FAD,FAD1,FANCD,FANCD1,XRCC11	0.001	MODERATE	missense_variant	0.991
chr13	32913576	A	G	MAH_BTN-001	BRCA2	ENSP00000369497:p.E1695G,ENSP00000439902:p.E1695G	OLAPARIB	FDA Approved					PARP inhibitors		Advanced or metastatic ovarian cancer and breast cancer		Biallelic Inactivation	1	1	KEEP		Somatic	1.7206e-15	1.7206e-15		null	null		1830	1508	29	NS,adrenal_gland,autonomic_ganglia,biliary_tract,bone,breast,central_nervous_system,cervix,endometrium,eye,haematopoietic_and_lymphoid_tissue,kidney,large_intestine,liver,lung,oesophagus,ovary,pancreas,peritoneum,pituitary,prostate,salivary_gland,skin,small_intestine,soft_tissue,stomach,thyroid,upper_aerodigestive_tract,urinary_tract		BRCA2,BRCC2,FACD,FAD,FAD1,FANCD,FANCD1,XRCC11	0	MODERATE	missense_variant	0.421
chr13	32912868	A	G	MAH_BTN-003	BRCA2	ENSP00000369497:p.N1459S,ENSP00000439902:p.N1459S	OLAPARIB	FDA Approved					PARP inhibitors		Advanced or metastatic ovarian cancer and breast cancer		Biallelic Inactivation	1	1	KEEP		Somatic	2.7295e-10	2.7295e-10		null	null		1830	1508	29	NS,adrenal_gland,autonomic_ganglia,biliary_tract,bone,breast,central_nervous_system,cervix,endometrium,eye,haematopoietic_and_lymphoid_tissue,kidney,large_intestine,liver,lung,oesophagus,ovary,pancreas,peritoneum,pituitary,prostate,salivary_gland,skin,small_intestine,soft_tissue,stomach,thyroid,upper_aerodigestive_tract,urinary_tract		BRCA2,BRCC2,FACD,FAD,FAD1,FANCD,FANCD1,XRCC11	0.001	MODERATE	missense_variant	0.172
chr13	32913928	ACTTGTGACTAG	A	MAH_BTN-019	BRCA2	ENSP00000439902:p.LVTS1813-1816X,ENSP00000369497:p.LVTS1813-1816X	OLAPARIB	FDA Approved					PARP inhibitors		Advanced or metastatic ovarian cancer and breast cancer		Biallelic Inactivation	0	1			Somatic	1.4831e-05	1.4831e-05		null	null		1830	1508	29	NS,adrenal_gland,autonomic_ganglia,biliary_tract,bone,breast,central_nervous_system,cervix,endometrium,eye,haematopoietic_and_lymphoid_tissue,kidney,large_intestine,liver,lung,oesophagus,ovary,pancreas,peritoneum,pituitary,prostate,salivary_gland,skin,small_intestine,soft_tissue,stomach,thyroid,upper_aerodigestive_tract,urinary_tract		BRCA2,BRCC2,FACD,FAD,FAD1,FANCD,FANCD1,XRCC11	0	HIGH	frameshift_variant	0
chr13	32906781	C	A	MAH_BTN-024	BRCA2	ENSP00000369497:p.P389Q,ENSP00000439902:p.P389Q	OLAPARIB	FDA Approved					PARP inhibitors		Advanced or metastatic ovarian cancer and breast cancer		Biallelic Inactivation	1	1	KEEP		Somatic	8.5516e-27	8.5516e-27		null	null		1830	1508	29	NS,adrenal_gland,autonomic_ganglia,biliary_tract,bone,breast,central_nervous_system,cervix,endometrium,eye,haematopoietic_and_lymphoid_tissue,kidney,large_intestine,liver,lung,oesophagus,ovary,pancreas,peritoneum,pituitary,prostate,salivary_gland,skin,small_intestine,soft_tissue,stomach,thyroid,upper_aerodigestive_tract,urinary_tract		BRCA2,BRCC2,FACD,FAD,FAD1,FANCD,FANCD1,XRCC11	0.0051	MODERATE	missense_variant	0.154
chr13	32944624	C	G	MAH_BTN-032	BRCA2	ENSP00000439902:p.S2806*,ENSP00000369497:p.S2806*	OLAPARIB	FDA Approved					PARP inhibitors		Advanced or metastatic ovarian cancer and breast cancer		Biallelic Inactivation	1	1	KEEP		Somatic	2.6525e-14	2.6525e-14		null	null		1830	1508	29	NS,adrenal_gland,autonomic_ganglia,biliary_tract,bone,breast,central_nervous_system,cervix,endometrium,eye,haematopoietic_and_lymphoid_tissue,kidney,large_intestine,liver,lung,oesophagus,ovary,pancreas,peritoneum,pituitary,prostate,salivary_gland,skin,small_intestine,soft_tissue,stomach,thyroid,upper_aerodigestive_tract,urinary_tract		BRCA2,BRCC2,FACD,FAD,FAD1,FANCD,FANCD1,XRCC11	0	HIGH	stop_gained	0
chr13	32906748	GT	G	MAH_BTN-042	BRCA2	ENSP00000439902:p.S378X,ENSP00000369497:p.S378X	OLAPARIB	FDA Approved					PARP inhibitors		Advanced or metastatic ovarian cancer and breast cancer		Biallelic Inactivation	0	1			Somatic	1.4861e-20	1.4861e-20		null	null		1830	1508	29	NS,adrenal_gland,autonomic_ganglia,biliary_tract,bone,breast,central_nervous_system,cervix,endometrium,eye,haematopoietic_and_lymphoid_tissue,kidney,large_intestine,liver,lung,oesophagus,ovary,pancreas,peritoneum,pituitary,prostate,salivary_gland,skin,small_intestine,soft_tissue,stomach,thyroid,upper_aerodigestive_tract,urinary_tract		BRCA2,BRCC2,FACD,FAD,FAD1,FANCD,FANCD1,XRCC11	0	HIGH	frameshift_variant	0
chr13	32949509	C	G	MAH_BTN-042	BRCA2	ENSP00000439902:p.,ENSP00000369497:p.	OLAPARIB	FDA Approved					PARP inhibitors		Advanced or metastatic ovarian cancer and breast cancer		Biallelic Inactivation	1	1	KEEP		Somatic	5.3843e-05	5.3843e-05		null	null		1830	1508	29	NS,adrenal_gland,autonomic_ganglia,biliary_tract,bone,breast,central_nervous_system,cervix,endometrium,eye,haematopoietic_and_lymphoid_tissue,kidney,large_intestine,liver,lung,oesophagus,ovary,pancreas,peritoneum,pituitary,prostate,salivary_gland,skin,small_intestine,soft_tissue,stomach,thyroid,upper_aerodigestive_tract,urinary_tract		BRCA2,BRCC2,FACD,FAD,FAD1,FANCD,FANCD1,XRCC11	0	MODERATE	missense_variant	0
chr13	32905069	A	AT	MAH_BTN-043	BRCA2	ENSP00000439902:p.Y232YX,ENSP00000369497:p.Y232YX	OLAPARIB	FDA Approved					PARP inhibitors		Advanced or metastatic ovarian cancer and breast cancer		Biallelic Inactivation	0	1			Somatic	9.9678e-07	9.9678e-07		null	null		1830	1508	29	NS,adrenal_gland,autonomic_ganglia,biliary_tract,bone,breast,central_nervous_system,cervix,endometrium,eye,haematopoietic_and_lymphoid_tissue,kidney,large_intestine,liver,lung,oesophagus,ovary,pancreas,peritoneum,pituitary,prostate,salivary_gland,skin,small_intestine,soft_tissue,stomach,thyroid,upper_aerodigestive_tract,urinary_tract		BRCA2,BRCC2,FACD,FAD,FAD1,FANCD,FANCD1,XRCC11	0	HIGH	frameshift_variant	0
chr13	32954022	C	CA	MAH_BTN-043	BRCA2	ENSP00000369497:p.T3033NX,ENSP00000439902:p.T3033NX	OLAPARIB	FDA Approved					PARP inhibitors		Advanced or metastatic ovarian cancer and breast cancer		Biallelic Inactivation	0	1			Somatic	0.0053469	0.0053469	COSM2071555,COSM2071556,COSM5801062,COSM5801063	22	2	breast,upper_aerodigestive_tract	1830	1508	29	NS,adrenal_gland,autonomic_ganglia,biliary_tract,bone,breast,central_nervous_system,cervix,endometrium,eye,haematopoietic_and_lymphoid_tissue,kidney,large_intestine,liver,lung,oesophagus,ovary,pancreas,peritoneum,pituitary,prostate,salivary_gland,skin,small_intestine,soft_tissue,stomach,thyroid,upper_aerodigestive_tract,urinary_tract		BRCA2,BRCC2,FACD,FAD,FAD1,FANCD,FANCD1,XRCC11	0.000160875	HIGH	frameshift_variant	0
chr13	32953521	A	C	MAH_BTN-046	BRCA2	ENSP00000369497:p.Q2941P,ENSP00000439902:p.Q2941P	OLAPARIB	FDA Approved					PARP inhibitors		Advanced or metastatic ovarian cancer and breast cancer		Biallelic Inactivation	1	1	KEEP		Somatic	1.37327e-43	1.37327e-43		null	null		1830	1508	29	NS,adrenal_gland,autonomic_ganglia,biliary_tract,bone,breast,central_nervous_system,cervix,endometrium,eye,haematopoietic_and_lymphoid_tissue,kidney,large_intestine,liver,lung,oesophagus,ovary,pancreas,peritoneum,pituitary,prostate,salivary_gland,skin,small_intestine,soft_tissue,stomach,thyroid,upper_aerodigestive_tract,urinary_tract	Nucleic acid-binding, OB-fold-like (1);	BRCA2,BRCC2,FACD,FAD,FAD1,FANCD,FANCD1,XRCC11	0	MODERATE	missense_variant	1
chr13	32911937	A	G	MAH_BTN-050	BRCA2	ENSP00000369497:p.M1149V,ENSP00000439902:p.M1149V	OLAPARIB	FDA Approved					PARP inhibitors		Advanced or metastatic ovarian cancer and breast cancer		Biallelic Inactivation	1	1	KEEP		Somatic	6.5271e-15	6.5271e-15		null	null		1830	1508	29	NS,adrenal_gland,autonomic_ganglia,biliary_tract,bone,breast,central_nervous_system,cervix,endometrium,eye,haematopoietic_and_lymphoid_tissue,kidney,large_intestine,liver,lung,oesophagus,ovary,pancreas,peritoneum,pituitary,prostate,salivary_gland,skin,small_intestine,soft_tissue,stomach,thyroid,upper_aerodigestive_tract,urinary_tract		BRCA2,BRCC2,FACD,FAD,FAD1,FANCD,FANCD1,XRCC11	0.005	MODERATE	missense_variant	0.001
chr13	32914348	G	T	MAH_BTN-066	BRCA2	ENSP00000369497:p.L1952F,ENSP00000439902:p.L1952F	OLAPARIB	FDA Approved					PARP inhibitors		Advanced or metastatic ovarian cancer and breast cancer		Biallelic Inactivation	0	1	KEEP			null	null		null	null		1830	1508	29	NS,adrenal_gland,autonomic_ganglia,biliary_tract,bone,breast,central_nervous_system,cervix,endometrium,eye,haematopoietic_and_lymphoid_tissue,kidney,large_intestine,liver,lung,oesophagus,ovary,pancreas,peritoneum,pituitary,prostate,salivary_gland,skin,small_intestine,soft_tissue,stomach,thyroid,upper_aerodigestive_tract,urinary_tract		BRCA2,BRCC2,FACD,FAD,FAD1,FANCD,FANCD1,XRCC11	0	MODERATE	missense_variant	0.117
chr13	32913271	A	C	MAH_BTN-077	BRCA2	ENSP00000369497:p.E1593D,ENSP00000439902:p.E1593D	OLAPARIB	FDA Approved					PARP inhibitors		Advanced or metastatic ovarian cancer and breast cancer		Biallelic Inactivation	1	1	KEEP		Somatic	3.55e-15	3.55e-15		null	null		1830	1508	29	NS,adrenal_gland,autonomic_ganglia,biliary_tract,bone,breast,central_nervous_system,cervix,endometrium,eye,haematopoietic_and_lymphoid_tissue,kidney,large_intestine,liver,lung,oesophagus,ovary,pancreas,peritoneum,pituitary,prostate,salivary_gland,skin,small_intestine,soft_tissue,stomach,thyroid,upper_aerodigestive_tract,urinary_tract		BRCA2,BRCC2,FACD,FAD,FAD1,FANCD,FANCD1,XRCC11	0.0051	MODERATE	missense_variant	0.128
chr13	32906558	T	A	MAH_BTN-079	BRCA2	ENSP00000439902:p.C315S,ENSP00000369497:p.C315S	OLAPARIB	FDA Approved					PARP inhibitors		Advanced or metastatic ovarian cancer and breast cancer		Biallelic Inactivation	0	1	KEEP			null	null		null	null		1830	1508	29	NS,adrenal_gland,autonomic_ganglia,biliary_tract,bone,breast,central_nervous_system,cervix,endometrium,eye,haematopoietic_and_lymphoid_tissue,kidney,large_intestine,liver,lung,oesophagus,ovary,pancreas,peritoneum,pituitary,prostate,salivary_gland,skin,small_intestine,soft_tissue,stomach,thyroid,upper_aerodigestive_tract,urinary_tract		BRCA2,BRCC2,FACD,FAD,FAD1,FANCD,FANCD1,XRCC11	0.0079	MODERATE	missense_variant	0.289
chr13	32911822	A	C	MAH_BTN-092	BRCA2	ENSP00000369497:p.E1110D,ENSP00000439902:p.E1110D	OLAPARIB	FDA Approved					PARP inhibitors		Advanced or metastatic ovarian cancer and breast cancer		Biallelic Inactivation	1	1	KEEP		Somatic	1.8324e-10	1.8324e-10		null	null		1830	1508	29	NS,adrenal_gland,autonomic_ganglia,biliary_tract,bone,breast,central_nervous_system,cervix,endometrium,eye,haematopoietic_and_lymphoid_tissue,kidney,large_intestine,liver,lung,oesophagus,ovary,pancreas,peritoneum,pituitary,prostate,salivary_gland,skin,small_intestine,soft_tissue,stomach,thyroid,upper_aerodigestive_tract,urinary_tract		BRCA2,BRCC2,FACD,FAD,FAD1,FANCD,FANCD1,XRCC11	0.001	MODERATE	missense_variant	0.991
chr13	32910840	T	C	MAH_R17017917LU01	BRCA2	ENSP00000369497:p.V783A,ENSP00000439902:p.V783A	OLAPARIB	FDA Approved					PARP inhibitors		Advanced or metastatic ovarian cancer and breast cancer		Biallelic Inactivation	1	1	KEEP		Somatic	4.876900190517409E-15	4.876900190517409E-15		null	null		1885	1554	29	NS,adrenal_gland,autonomic_ganglia,biliary_tract,bone,breast,central_nervous_system,cervix,endometrium,eye,haematopoietic_and_lymphoid_tissue,kidney,large_intestine,liver,lung,oesophagus,ovary,pancreas,peritoneum,pituitary,prostate,salivary_gland,skin,small_intestine,soft_tissue,stomach,thyroid,upper_aerodigestive_tract,urinary_tract		BRCA2,FANCD1,FACD,FANCD,FAD,FAD1,BRCC2,XRCC11	1.1598237324506044E-4	MODERATE	missense_variant	0.003000000026077032
chr13	32911937	A	G	MAH_R17017902LU01	BRCA2	ENSP00000369497:p.M1149V,ENSP00000439902:p.M1149V	OLAPARIB	FDA Approved					PARP inhibitors		Advanced or metastatic ovarian cancer and breast cancer		Biallelic Inactivation	1	1	KEEP		Somatic	1.7289000533786E-20	1.7289000533786E-20		null	null		1885	1554	29	NS,adrenal_gland,autonomic_ganglia,biliary_tract,bone,breast,central_nervous_system,cervix,endometrium,eye,haematopoietic_and_lymphoid_tissue,kidney,large_intestine,liver,lung,oesophagus,ovary,pancreas,peritoneum,pituitary,prostate,salivary_gland,skin,small_intestine,soft_tissue,stomach,thyroid,upper_aerodigestive_tract,urinary_tract		BRCA2,FANCD1,FACD,FANCD,FAD,FAD1,BRCC2,XRCC11	0.004999999888241291	MODERATE	missense_variant	0.0010000000474974513
chr13	32911937	A	G	MAH_R17017891LU01	BRCA2	ENSP00000369497:p.M1149V,ENSP00000439902:p.M1149V	OLAPARIB	FDA Approved					PARP inhibitors		Advanced or metastatic ovarian cancer and breast cancer		Biallelic Inactivation	1	1	KEEP		Somatic	4.2656000786229775E-24	4.2656000786229775E-24		null	null		1885	1554	29	NS,adrenal_gland,autonomic_ganglia,biliary_tract,bone,breast,central_nervous_system,cervix,endometrium,eye,haematopoietic_and_lymphoid_tissue,kidney,large_intestine,liver,lung,oesophagus,ovary,pancreas,peritoneum,pituitary,prostate,salivary_gland,skin,small_intestine,soft_tissue,stomach,thyroid,upper_aerodigestive_tract,urinary_tract		BRCA2,FANCD1,FACD,FANCD,FAD,FAD1,BRCC2,XRCC11	0.004999999888241291	MODERATE	missense_variant	0.0010000000474974513
chr13	32913411	A	G	MAH_R17017912LU01	BRCA2	ENSP00000439902:p.H1640R,ENSP00000369497:p.H1640R	OLAPARIB	FDA Approved					PARP inhibitors		Advanced or metastatic ovarian cancer and breast cancer		Biallelic Inactivation	0	1	KEEP			null	null	COSM3376531,COSM3376532	2	1	pancreas	1885	1554	29	NS,adrenal_gland,autonomic_ganglia,biliary_tract,bone,breast,central_nervous_system,cervix,endometrium,eye,haematopoietic_and_lymphoid_tissue,kidney,large_intestine,liver,lung,oesophagus,ovary,pancreas,peritoneum,pituitary,prostate,salivary_gland,skin,small_intestine,soft_tissue,stomach,thyroid,upper_aerodigestive_tract,urinary_tract		BRCA2,FANCD1,FACD,FANCD,FAD,FAD1,BRCC2,XRCC11	1.8649800040293485E-4	MODERATE	missense_variant	0.9490000009536743
chr13	32913603	GAATA	G	MAH_R17017890LU01	BRCA2	ENSP00000369497:p.NT1706-1707X,ENSP00000439902:p.NT1706-1707X	OLAPARIB	FDA Approved					PARP inhibitors		Advanced or metastatic ovarian cancer and breast cancer		Biallelic Inactivation	0	1			Somatic	0.0014296999434009194	0.0014296999434009194		null	null		1885	1554	29	NS,adrenal_gland,autonomic_ganglia,biliary_tract,bone,breast,central_nervous_system,cervix,endometrium,eye,haematopoietic_and_lymphoid_tissue,kidney,large_intestine,liver,lung,oesophagus,ovary,pancreas,peritoneum,pituitary,prostate,salivary_gland,skin,small_intestine,soft_tissue,stomach,thyroid,upper_aerodigestive_tract,urinary_tract		BRCA2,FANCD1,FACD,FANCD,FAD,FAD1,BRCC2,XRCC11	0.0	HIGH	frameshift_variant	0.0
chr13	32913603	GAATA	G	MAH_R17017889LU01	BRCA2	ENSP00000369497:p.NT1706-1707X,ENSP00000439902:p.NT1706-1707X	OLAPARIB	FDA Approved					PARP inhibitors		Advanced or metastatic ovarian cancer and breast cancer		Biallelic Inactivation	0	1			Somatic	3.1153000179529045E-9	3.1153000179529045E-9		null	null		1885	1554	29	NS,adrenal_gland,autonomic_ganglia,biliary_tract,bone,breast,central_nervous_system,cervix,endometrium,eye,haematopoietic_and_lymphoid_tissue,kidney,large_intestine,liver,lung,oesophagus,ovary,pancreas,peritoneum,pituitary,prostate,salivary_gland,skin,small_intestine,soft_tissue,stomach,thyroid,upper_aerodigestive_tract,urinary_tract		BRCA2,FANCD1,FACD,FANCD,FAD,FAD1,BRCC2,XRCC11	0.0	HIGH	frameshift_variant	0.0
chr13	32914137	C	G	MAH_R17017918LU01	BRCA2	ENSP00000439902:p.S1882*,ENSP00000369497:p.S1882*	OLAPARIB	FDA Approved					PARP inhibitors		Advanced or metastatic ovarian cancer and breast cancer		Biallelic Inactivation	1	1	KEEP		Somatic	1.8462000298313797E-5	1.8462000298313797E-5		null	null		1885	1554	29	NS,adrenal_gland,autonomic_ganglia,biliary_tract,bone,breast,central_nervous_system,cervix,endometrium,eye,haematopoietic_and_lymphoid_tissue,kidney,large_intestine,liver,lung,oesophagus,ovary,pancreas,peritoneum,pituitary,prostate,salivary_gland,skin,small_intestine,soft_tissue,stomach,thyroid,upper_aerodigestive_tract,urinary_tract		BRCA2,FANCD1,FACD,FANCD,FAD,FAD1,BRCC2,XRCC11	0.0	HIGH	stop_gained	0.0
chr13	32914331	C	T	MAH_R17017891LU01	BRCA2	ENSP00000439902:p.P1947S,ENSP00000369497:p.P1947S	OLAPARIB	FDA Approved					PARP inhibitors		Advanced or metastatic ovarian cancer and breast cancer		Biallelic Inactivation	1	1	KEEP		Somatic	5.934199798218742E-10	5.934199798218742E-10		null	null		1885	1554	29	NS,adrenal_gland,autonomic_ganglia,biliary_tract,bone,breast,central_nervous_system,cervix,endometrium,eye,haematopoietic_and_lymphoid_tissue,kidney,large_intestine,liver,lung,oesophagus,ovary,pancreas,peritoneum,pituitary,prostate,salivary_gland,skin,small_intestine,soft_tissue,stomach,thyroid,upper_aerodigestive_tract,urinary_tract		BRCA2,FANCD1,FACD,FANCD,FAD,FAD1,BRCC2,XRCC11	1.739332074066624E-4	MODERATE	missense_variant	0.024000000208616257
chr13	32949509	C	G	MAH_R17017909LU01	BRCA2	ENSP00000439902:p.,ENSP00000369497:p.	OLAPARIB	FDA Approved					PARP inhibitors		Advanced or metastatic ovarian cancer and breast cancer		Biallelic Inactivation	1	1	KEEP		Somatic	1.2089000023252083E-8	1.2089000023252083E-8		null	null		1885	1554	29	NS,adrenal_gland,autonomic_ganglia,biliary_tract,bone,breast,central_nervous_system,cervix,endometrium,eye,haematopoietic_and_lymphoid_tissue,kidney,large_intestine,liver,lung,oesophagus,ovary,pancreas,peritoneum,pituitary,prostate,salivary_gland,skin,small_intestine,soft_tissue,stomach,thyroid,upper_aerodigestive_tract,urinary_tract		BRCA2,FANCD1,FACD,FANCD,FAD,FAD1,BRCC2,XRCC11	6.172839784994721E-4	MODERATE	missense_variant	0.0

## Sheet: NF1
Chrom	Pos	Reference	Call	PN	Gene_symbol	COSMIC_HGVSp	Drug_Gene	Drug_Gene_ApprovalStatus	Drug_Pathway	Drug_Pathway_ApprovalStatus	Drug_SourcePathway	Drug_Mechanism_of_Action	Gene_ActionableDrugClasses	Gene_ActionablePathways	Gene_ActionableTumors	ResistancexSensitivity_Variants	Gene_ActionableMutations	caller_both	caller_either	mutect_judgement	mutect_failure_reasons	varscan2_somatic_status	varscan2_somatic_p_value	varscan2_variant_p_value	COSMIC_IDs	COSMIC_count_vars	COSMIC_pscount	COSMIC_primarysites	COSMIC_count_varsInGene	COSMIC_count_lociInGene	COSMIC_count_primarysitesInGene	COSMIC_primarysitesInGene	dbNSFP_Interpro_domain	GENE_Aliases	VEP_Max_Af	VEP_Max_Impact	VEP_max_consequence	VEP_max_score	a
chr17	29554278	G	A	MAH_BTN-003	NF1	ENSP00000351015:p.R765H	TRAMETINIB	FDA Approved	Vemurafenib	FDA approved	RAF/MEK	Vemurafenib is an orally available inhibitor of mutated BRAF-serine-threonine kinase. It is especially potent against the BRAF V600E mutation. This mutation involves the substitution of glutamic acid for valine at codon 600. The BRAF oncogene, most of which have the V600E mutation, activates mitogen-activated kinase (MAPK) pathway which results in cell growth, proliferation, and metastasis. Vemur…	PI3K/AKT/mTOR inhibitors, RAF inhibitors, MEK inhibitors	PI3K, RAF/MEK			Biallelic Inactivation	1	1	KEEP		Somatic	1.8169e-21	1.8169e-21		null	null		3190	2417	29	NS,adrenal_gland,autonomic_ganglia,biliary_tract,bone,breast,central_nervous_system,cervix,endometrium,genital_tract,haematopoietic_and_lymphoid_tissue,kidney,large_intestine,liver,lung,oesophagus,ovary,pancreas,pleura,prostate,salivary_gland,skin,small_intestine,soft_tissue,stomach,testis,thyroid,upper_aerodigestive_tract,urinary_tract	Armadillo-type fold (1);	NF1	0.0014	MODERATE	missense_variant	0.999
chr17	29665041	A	G	MAH_BTN-007	NF1	ENSP00000396481:p.R28G,ENSP00000351015:p.	TRAMETINIB	FDA Approved	Vemurafenib	FDA approved	RAF/MEK	Vemurafenib is an orally available inhibitor of mutated BRAF-serine-threonine kinase. It is especially potent against the BRAF V600E mutation. This mutation involves the substitution of glutamic acid for valine at codon 600. The BRAF oncogene, most of which have the V600E mutation, activates mitogen-activated kinase (MAPK) pathway which results in cell growth, proliferation, and metastasis. Vemur…	PI3K/AKT/mTOR inhibitors, RAF inhibitors, MEK inhibitors	PI3K, RAF/MEK			Biallelic Inactivation	1	1	KEEP		Somatic	0.00011557	0.00011557		null	null		3190	2417	29	NS,adrenal_gland,autonomic_ganglia,biliary_tract,bone,breast,central_nervous_system,cervix,endometrium,genital_tract,haematopoietic_and_lymphoid_tissue,kidney,large_intestine,liver,lung,oesophagus,ovary,pancreas,pleura,prostate,salivary_gland,skin,small_intestine,soft_tissue,stomach,testis,thyroid,upper_aerodigestive_tract,urinary_tract		NF1	0	HIGH	splice_acceptor_variant	0.995
chr17	29554593	A	G	MAH_BTN-013	NF1	ENSP00000351015:p.N793S	TRAMETINIB	FDA Approved	Vemurafenib	FDA approved	RAF/MEK	Vemurafenib is an orally available inhibitor of mutated BRAF-serine-threonine kinase. It is especially potent against the BRAF V600E mutation. This mutation involves the substitution of glutamic acid for valine at codon 600. The BRAF oncogene, most of which have the V600E mutation, activates mitogen-activated kinase (MAPK) pathway which results in cell growth, proliferation, and metastasis. Vemur…	PI3K/AKT/mTOR inhibitors, RAF inhibitors, MEK inhibitors	PI3K, RAF/MEK			Biallelic Inactivation	0	1	KEEP			null	null		null	null		3190	2417	29	NS,adrenal_gland,autonomic_ganglia,biliary_tract,bone,breast,central_nervous_system,cervix,endometrium,genital_tract,haematopoietic_and_lymphoid_tissue,kidney,large_intestine,liver,lung,oesophagus,ovary,pancreas,pleura,prostate,salivary_gland,skin,small_intestine,soft_tissue,stomach,testis,thyroid,upper_aerodigestive_tract,urinary_tract	Armadillo-type fold (1);	NF1	0	MODERATE	missense_variant	0.974
chr17	29527461	C	T	MAH_BTN-043	NF1	ENSP00000351015:p.R304*	TRAMETINIB	FDA Approved	Vemurafenib	FDA approved	RAF/MEK	Vemurafenib is an orally available inhibitor of mutated BRAF-serine-threonine kinase. It is especially potent against the BRAF V600E mutation. This mutation involves the substitution of glutamic acid for valine at codon 600. The BRAF oncogene, most of which have the V600E mutation, activates mitogen-activated kinase (MAPK) pathway which results in cell growth, proliferation, and metastasis. Vemur…	PI3K/AKT/mTOR inhibitors, RAF inhibitors, MEK inhibitors	PI3K, RAF/MEK			Biallelic Inactivation	1	1	KEEP		Somatic	2.789e-09	2.789e-09	COSM1666613,COSM24486	7	2	adrenal_gland,soft_tissue	3190	2417	29	NS,adrenal_gland,autonomic_ganglia,biliary_tract,bone,breast,central_nervous_system,cervix,endometrium,genital_tract,haematopoietic_and_lymphoid_tissue,kidney,large_intestine,liver,lung,oesophagus,ovary,pancreas,pleura,prostate,salivary_gland,skin,small_intestine,soft_tissue,stomach,testis,thyroid,upper_aerodigestive_tract,urinary_tract		NF1	0	HIGH	stop_gained	0
chr17	29701039	A	C	MAH_BTN-047	NF1	ENSP00000396481:p.K589Q,ENSP00000351015:p.K2796Q	TRAMETINIB	FDA Approved	Vemurafenib	FDA approved	RAF/MEK	Vemurafenib is an orally available inhibitor of mutated BRAF-serine-threonine kinase. It is especially potent against the BRAF V600E mutation. This mutation involves the substitution of glutamic acid for valine at codon 600. The BRAF oncogene, most of which have the V600E mutation, activates mitogen-activated kinase (MAPK) pathway which results in cell growth, proliferation, and metastasis. Vemur…	PI3K/AKT/mTOR inhibitors, RAF inhibitors, MEK inhibitors	PI3K, RAF/MEK			Biallelic Inactivation	0	1	KEEP			null	null		null	null		3190	2417	29	NS,adrenal_gland,autonomic_ganglia,biliary_tract,bone,breast,central_nervous_system,cervix,endometrium,genital_tract,haematopoietic_and_lymphoid_tissue,kidney,large_intestine,liver,lung,oesophagus,ovary,pancreas,pleura,prostate,salivary_gland,skin,small_intestine,soft_tissue,stomach,testis,thyroid,upper_aerodigestive_tract,urinary_tract		NF1	0	MODERATE	missense_variant	0.989
chr17	29553484	C	T	MAH_BTN-050	NF1	ENSP00000351015:p.P678L	TRAMETINIB	FDA Approved	Vemurafenib	FDA approved	RAF/MEK	Vemurafenib is an orally available inhibitor of mutated BRAF-serine-threonine kinase. It is especially potent against the BRAF V600E mutation. This mutation involves the substitution of glutamic acid for valine at codon 600. The BRAF oncogene, most of which have the V600E mutation, activates mitogen-activated kinase (MAPK) pathway which results in cell growth, proliferation, and metastasis. Vemur…	PI3K/AKT/mTOR inhibitors, RAF inhibitors, MEK inhibitors	PI3K, RAF/MEK			Biallelic Inactivation	1	1	KEEP		Somatic	1.2119e-10	1.2119e-10		null	null		3190	2417	29	NS,adrenal_gland,autonomic_ganglia,biliary_tract,bone,breast,central_nervous_system,cervix,endometrium,genital_tract,haematopoietic_and_lymphoid_tissue,kidney,large_intestine,liver,lung,oesophagus,ovary,pancreas,pleura,prostate,salivary_gland,skin,small_intestine,soft_tissue,stomach,testis,thyroid,upper_aerodigestive_tract,urinary_tract	Armadillo-type fold (1);	NF1	0.003	MODERATE	missense_variant	0.816
chr17	29527462	G	A	MAH_BTN-051	NF1	ENSP00000351015:p.R304Q	TRAMETINIB	FDA Approved	Vemurafenib	FDA approved	RAF/MEK	Vemurafenib is an orally available inhibitor of mutated BRAF-serine-threonine kinase. It is especially potent against the BRAF V600E mutation. This mutation involves the substitution of glutamic acid for valine at codon 600. The BRAF oncogene, most of which have the V600E mutation, activates mitogen-activated kinase (MAPK) pathway which results in cell growth, proliferation, and metastasis. Vemur…	PI3K/AKT/mTOR inhibitors, RAF inhibitors, MEK inhibitors	PI3K, RAF/MEK			Biallelic Inactivation	0	1	KEEP			null	null		null	null		3190	2417	29	NS,adrenal_gland,autonomic_ganglia,biliary_tract,bone,breast,central_nervous_system,cervix,endometrium,genital_tract,haematopoietic_and_lymphoid_tissue,kidney,large_intestine,liver,lung,oesophagus,ovary,pancreas,pleura,prostate,salivary_gland,skin,small_intestine,soft_tissue,stomach,testis,thyroid,upper_aerodigestive_tract,urinary_tract	Armadillo-type fold (1);	NF1	0	MODERATE	missense_variant	0.997
chr17	29665757	C	A	MAH_BTN-057	NF1	ENSP00000396481:p.Y78*,ENSP00000351015:p.Y2285*	TRAMETINIB	FDA Approved	Vemurafenib	FDA approved	RAF/MEK	Vemurafenib is an orally available inhibitor of mutated BRAF-serine-threonine kinase. It is especially potent against the BRAF V600E mutation. This mutation involves the substitution of glutamic acid for valine at codon 600. The BRAF oncogene, most of which have the V600E mutation, activates mitogen-activated kinase (MAPK) pathway which results in cell growth, proliferation, and metastasis. Vemur…	PI3K/AKT/mTOR inhibitors, RAF inhibitors, MEK inhibitors	PI3K, RAF/MEK			Biallelic Inactivation	0	1	KEEP			null	null	COSM33676,COSM705652	3	2	lung,soft_tissue	3190	2417	29	NS,adrenal_gland,autonomic_ganglia,biliary_tract,bone,breast,central_nervous_system,cervix,endometrium,genital_tract,haematopoietic_and_lymphoid_tissue,kidney,large_intestine,liver,lung,oesophagus,ovary,pancreas,pleura,prostate,salivary_gland,skin,small_intestine,soft_tissue,stomach,testis,thyroid,upper_aerodigestive_tract,urinary_tract		NF1	0	HIGH	stop_gained	0
chr17	29509688	G	A	MAH_BTN-058	NF1	ENSP00000351015:p.	TRAMETINIB	FDA Approved	Vemurafenib	FDA approved	RAF/MEK	Vemurafenib is an orally available inhibitor of mutated BRAF-serine-threonine kinase. It is especially potent against the BRAF V600E mutation. This mutation involves the substitution of glutamic acid for valine at codon 600. The BRAF oncogene, most of which have the V600E mutation, activates mitogen-activated kinase (MAPK) pathway which results in cell growth, proliferation, and metastasis. Vemur…	PI3K/AKT/mTOR inhibitors, RAF inhibitors, MEK inhibitors	PI3K, RAF/MEK			Biallelic Inactivation	1	1	KEEP		Somatic	2.0568e-13	2.0568e-13		null	null		3190	2417	29	NS,adrenal_gland,autonomic_ganglia,biliary_tract,bone,breast,central_nervous_system,cervix,endometrium,genital_tract,haematopoietic_and_lymphoid_tissue,kidney,large_intestine,liver,lung,oesophagus,ovary,pancreas,pleura,prostate,salivary_gland,skin,small_intestine,soft_tissue,stomach,testis,thyroid,upper_aerodigestive_tract,urinary_tract		NF1	0.002	MODERATE	splice_region_variant	0
chr17	29483109	G	A	MAH_BTN-065	NF1	ENSP00000351015:p.G57S	TRAMETINIB	FDA Approved	Vemurafenib	FDA approved	RAF/MEK	Vemurafenib is an orally available inhibitor of mutated BRAF-serine-threonine kinase. It is especially potent against the BRAF V600E mutation. This mutation involves the substitution of glutamic acid for valine at codon 600. The BRAF oncogene, most of which have the V600E mutation, activates mitogen-activated kinase (MAPK) pathway which results in cell growth, proliferation, and metastasis. Vemur…	PI3K/AKT/mTOR inhibitors, RAF inhibitors, MEK inhibitors	PI3K, RAF/MEK			Biallelic Inactivation	0	1	KEEP			null	null	COSM977392,COSM977393	2	1	endometrium	3190	2417	29	NS,adrenal_gland,autonomic_ganglia,biliary_tract,bone,breast,central_nervous_system,cervix,endometrium,genital_tract,haematopoietic_and_lymphoid_tissue,kidney,large_intestine,liver,lung,oesophagus,ovary,pancreas,pleura,prostate,salivary_gland,skin,small_intestine,soft_tissue,stomach,testis,thyroid,upper_aerodigestive_tract,urinary_tract		NF1	0.000172891	MODERATE	missense_variant	1
chr17	29653020	A	G	MAH_BTN-079	NF1	ENSP00000351015:p.N1673S	TRAMETINIB	FDA Approved	Vemurafenib	FDA approved	RAF/MEK	Vemurafenib is an orally available inhibitor of mutated BRAF-serine-threonine kinase. It is especially potent against the BRAF V600E mutation. This mutation involves the substitution of glutamic acid for valine at codon 600. The BRAF oncogene, most of which have the V600E mutation, activates mitogen-activated kinase (MAPK) pathway which results in cell growth, proliferation, and metastasis. Vemur…	PI3K/AKT/mTOR inhibitors, RAF inhibitors, MEK inhibitors	PI3K, RAF/MEK			Biallelic Inactivation	1	1	KEEP		Somatic	1.3424e-14	1.3424e-14		null	null		3190	2417	29	NS,adrenal_gland,autonomic_ganglia,biliary_tract,bone,breast,central_nervous_system,cervix,endometrium,genital_tract,haematopoietic_and_lymphoid_tissue,kidney,large_intestine,liver,lung,oesophagus,ovary,pancreas,pleura,prostate,salivary_gland,skin,small_intestine,soft_tissue,stomach,testis,thyroid,upper_aerodigestive_tract,urinary_tract	Cellular retinaldehyde-binding/triple function, C-terminal (2);Armadillo-type fold (1);	NF1	0	MODERATE	missense_variant	1
chr17	29557366	G	A	MAH_BTN-085	NF1	ENSP00000351015:p.D1027N	TRAMETINIB	FDA Approved	Vemurafenib	FDA approved	RAF/MEK	Vemurafenib is an orally available inhibitor of mutated BRAF-serine-threonine kinase. It is especially potent against the BRAF V600E mutation. This mutation involves the substitution of glutamic acid for valine at codon 600. The BRAF oncogene, most of which have the V600E mutation, activates mitogen-activated kinase (MAPK) pathway which results in cell growth, proliferation, and metastasis. Vemur…	PI3K/AKT/mTOR inhibitors, RAF inhibitors, MEK inhibitors	PI3K, RAF/MEK			Biallelic Inactivation	0	1	KEEP			null	null		null	null		3190	2417	29	NS,adrenal_gland,autonomic_ganglia,biliary_tract,bone,breast,central_nervous_system,cervix,endometrium,genital_tract,haematopoietic_and_lymphoid_tissue,kidney,large_intestine,liver,lung,oesophagus,ovary,pancreas,pleura,prostate,salivary_gland,skin,small_intestine,soft_tissue,stomach,testis,thyroid,upper_aerodigestive_tract,urinary_tract	Armadillo-type fold (1);	NF1	3.01586e-05	MODERATE	missense_variant	1
chr17	29553484	C	T	MAH_BTN-091	NF1	ENSP00000351015:p.P678L	TRAMETINIB	FDA Approved	Vemurafenib	FDA approved	RAF/MEK	Vemurafenib is an orally available inhibitor of mutated BRAF-serine-threonine kinase. It is especially potent against the BRAF V600E mutation. This mutation involves the substitution of glutamic acid for valine at codon 600. The BRAF oncogene, most of which have the V600E mutation, activates mitogen-activated kinase (MAPK) pathway which results in cell growth, proliferation, and metastasis. Vemur…	PI3K/AKT/mTOR inhibitors, RAF inhibitors, MEK inhibitors	PI3K, RAF/MEK			Biallelic Inactivation	1	1	KEEP		Somatic	2.6426e-16	2.6426e-16		null	null		3190	2417	29	NS,adrenal_gland,autonomic_ganglia,biliary_tract,bone,breast,central_nervous_system,cervix,endometrium,genital_tract,haematopoietic_and_lymphoid_tissue,kidney,large_intestine,liver,lung,oesophagus,ovary,pancreas,pleura,prostate,salivary_gland,skin,small_intestine,soft_tissue,stomach,testis,thyroid,upper_aerodigestive_tract,urinary_tract	Armadillo-type fold (1);	NF1	0.003	MODERATE	missense_variant	0.816
chr17	29509688	G	A	MAH_R17017915LU01	NF1	ENSP00000351015:p.	TRAMETINIB	FDA Approved	Vemurafenib	FDA approved	RAF/MEK	Vemurafenib is an orally available inhibitor of mutated BRAF-serine-threonine kinase. It is especially potent against the BRAF V600E mutation. This mutation involves the substitution of glutamic acid for valine at codon 600. The BRAF oncogene, most of which have the V600E mutation, activates mitogen-activated kinase (MAPK) pathway which results in cell growth, proliferation, and metastasis. Vemur…	PI3K/AKT/mTOR inhibitors, RAF inhibitors, MEK inhibitors	PI3K, RAF/MEK			Biallelic Inactivation	1	1	KEEP		Somatic	3.3854001230793074E-5	3.3854001230793074E-5		null	null		3309	2517	29	NS,adrenal_gland,autonomic_ganglia,biliary_tract,bone,breast,central_nervous_system,cervix,endometrium,genital_tract,haematopoietic_and_lymphoid_tissue,kidney,large_intestine,liver,lung,oesophagus,ovary,pancreas,pleura,prostate,salivary_gland,skin,small_intestine,soft_tissue,stomach,testis,thyroid,upper_aerodigestive_tract,urinary_tract		NF1	0.0020000000949949026	MODERATE	splice_region_variant	0.0
chr17	29654538	G	A	MAH_R17017921LU01	NF1	ENSP00000351015:p.V1764I	TRAMETINIB	FDA Approved	Vemurafenib	FDA approved	RAF/MEK	Vemurafenib is an orally available inhibitor of mutated BRAF-serine-threonine kinase. It is especially potent against the BRAF V600E mutation. This mutation involves the substitution of glutamic acid for valine at codon 600. The BRAF oncogene, most of which have the V600E mutation, activates mitogen-activated kinase (MAPK) pathway which results in cell growth, proliferation, and metastasis. Vemur…	PI3K/AKT/mTOR inhibitors, RAF inhibitors, MEK inhibitors	PI3K, RAF/MEK			Biallelic Inactivation	1	1	KEEP		Somatic	1.1117000440208358E-6	1.1117000440208358E-6		null	null		3309	2517	29	NS,adrenal_gland,autonomic_ganglia,biliary_tract,bone,breast,central_nervous_system,cervix,endometrium,genital_tract,haematopoietic_and_lymphoid_tissue,kidney,large_intestine,liver,lung,oesophagus,ovary,pancreas,pleura,prostate,salivary_gland,skin,small_intestine,soft_tissue,stomach,testis,thyroid,upper_aerodigestive_tract,urinary_tract	Armadillo-type fold (1);	NF1	2.899222890846431E-4	MODERATE	missense_variant	0.8970000147819519
chr17	29661930	A	C	MAH_R17017907LU01	NF1	ENSP00000351015:p.N1963H,ENSP00000396481:p.	TRAMETINIB	FDA Approved	Vemurafenib	FDA approved	RAF/MEK	Vemurafenib is an orally available inhibitor of mutated BRAF-serine-threonine kinase. It is especially potent against the BRAF V600E mutation. This mutation involves the substitution of glutamic acid for valine at codon 600. The BRAF oncogene, most of which have the V600E mutation, activates mitogen-activated kinase (MAPK) pathway which results in cell growth, proliferation, and metastasis. Vemur…	PI3K/AKT/mTOR inhibitors, RAF inhibitors, MEK inhibitors	PI3K, RAF/MEK			Biallelic Inactivation	1	1	KEEP		Somatic	0.0015869999770075083	0.0015869999770075083		null	null		3309	2517	29	NS,adrenal_gland,autonomic_ganglia,biliary_tract,bone,breast,central_nervous_system,cervix,endometrium,genital_tract,haematopoietic_and_lymphoid_tissue,kidney,large_intestine,liver,lung,oesophagus,ovary,pancreas,pleura,prostate,salivary_gland,skin,small_intestine,soft_tissue,stomach,testis,thyroid,upper_aerodigestive_tract,urinary_tract	Armadillo-type fold (2);	NF1	0.0	MODERATE	missense_variant	0.9459999799728394
chr17	29684020	G	A	MAH_R17017890LU01	NF1	ENSP00000396481:p.R387H,ENSP00000351015:p.R2594H	TRAMETINIB	FDA Approved	Vemurafenib	FDA approved	RAF/MEK	Vemurafenib is an orally available inhibitor of mutated BRAF-serine-threonine kinase. It is especially potent against the BRAF V600E mutation. This mutation involves the substitution of glutamic acid for valine at codon 600. The BRAF oncogene, most of which have the V600E mutation, activates mitogen-activated kinase (MAPK) pathway which results in cell growth, proliferation, and metastasis. Vemur…	PI3K/AKT/mTOR inhibitors, RAF inhibitors, MEK inhibitors	PI3K, RAF/MEK			Biallelic Inactivation	0	1	KEEP			null	null	COSM3378125,COSM3378126,COSM3378125,COSM3378126	12	1	pancreas	3309	2517	29	NS,adrenal_gland,autonomic_ganglia,biliary_tract,bone,breast,central_nervous_system,cervix,endometrium,genital_tract,haematopoietic_and_lymphoid_tissue,kidney,large_intestine,liver,lung,oesophagus,ovary,pancreas,pleura,prostate,salivary_gland,skin,small_intestine,soft_tissue,stomach,testis,thyroid,upper_aerodigestive_tract,urinary_tract	Armadillo-type fold (1);	NF1	0.0	MODERATE	missense_variant	0.9990000128746033

## Sheet: PTEN
Chrom	Pos	Reference	Call	PN	Gene_symbol	COSMIC_HGVSp	Drug_Gene	Drug_Gene_ApprovalStatus	Drug_Pathway	Drug_Pathway_ApprovalStatus	Drug_SourcePathway	Drug_Mechanism_of_Action	Gene_ActionableDrugClasses	Gene_ActionablePathways	Gene_ActionableTumors	ResistancexSensitivity_Variants	Gene_ActionableMutations	caller_both	caller_either	mutect_judgement	mutect_failure_reasons	varscan2_somatic_status	varscan2_somatic_p_value	varscan2_variant_p_value	COSMIC_IDs	COSMIC_count_vars	COSMIC_pscount	COSMIC_primarysites	COSMIC_count_varsInGene	COSMIC_count_lociInGene	COSMIC_count_primarysitesInGene	COSMIC_primarysitesInGene	dbNSFP_Interpro_domain	GENE_Aliases	VEP_Max_Af	VEP_Max_Impact	VEP_max_consequence	VEP_max_score
chr10	89624265	AAGG	A	MAH_BTN-012	PTEN	ENSP00000361021:p.RR14-15R	ERLOTINIB,EVEROLIMUS,GEFITINIB,TEMSIROLIMUS	FDA Approved,FDA Approved,FDA Approved,FDA Approved					PI3K inhibitors, AKT inhibitors, and mTOR inhibitors, PARP inhibitors	PI3K	Numerous cancers	Resistance to EGFR inhibition	Deletion; Biallelic Inactivation	0	1			Somatic	1.9604e-05	1.9604e-05	COSM5878509	1	1	central_nervous_system	3591	1496	29	NS,autonomic_ganglia,biliary_tract,bone,breast,central_nervous_system,cervix,endometrium,eye,genital_tract,haematopoietic_and_lymphoid_tissue,kidney,large_intestine,liver,lung,meninges,oesophagus,ovary,pancreas,prostate,salivary_gland,skin,small_intestine,soft_tissue,stomach,thyroid,upper_aerodigestive_tract,urinary_tract,vulva		BZS,MHAM,MMAC1,PTEN,PTEN1,TEP1	0	MODERATE	inframe_deletion	0
chr10	89685307	T	C	MAH_BTN-024	PTEN	ENSP00000361021:p.Y68H	ERLOTINIB,EVEROLIMUS,GEFITINIB,TEMSIROLIMUS	FDA Approved,FDA Approved,FDA Approved,FDA Approved					PI3K inhibitors, AKT inhibitors, and mTOR inhibitors, PARP inhibitors	PI3K	Numerous cancers	Resistance to EGFR inhibition	Deletion; Biallelic Inactivation	1	1	KEEP		Somatic	0.0028986	0.0028986	COSM5036	14	10	NS,breast,central_nervous_system,endometrium,haematopoietic_and_lymphoid_tissue,kidney,ovary,pancreas,prostate,skin	3591	1496	29	NS,autonomic_ganglia,biliary_tract,bone,breast,central_nervous_system,cervix,endometrium,eye,genital_tract,haematopoietic_and_lymphoid_tissue,kidney,large_intestine,liver,lung,meninges,oesophagus,ovary,pancreas,prostate,salivary_gland,skin,small_intestine,soft_tissue,stomach,thyroid,upper_aerodigestive_tract,urinary_tract,vulva	Phosphatase tensin type (1);	BZS,MHAM,MMAC1,PTEN,PTEN1,TEP1	0	MODERATE	missense_variant	1
chr10	89692839	T	G	MAH_BTN-052	PTEN	ENSP00000361021:p.L108R	ERLOTINIB,EVEROLIMUS,GEFITINIB,TEMSIROLIMUS	FDA Approved,FDA Approved,FDA Approved,FDA Approved					PI3K inhibitors, AKT inhibitors, and mTOR inhibitors, PARP inhibitors	PI3K	Numerous cancers	Resistance to EGFR inhibition	Deletion; Biallelic Inactivation	1	1	KEEP		Somatic	5.1574e-22	5.1574e-22	COSM13135	3	2	breast,pancreas	3591	1496	29	NS,autonomic_ganglia,biliary_tract,bone,breast,central_nervous_system,cervix,endometrium,eye,genital_tract,haematopoietic_and_lymphoid_tissue,kidney,large_intestine,liver,lung,meninges,oesophagus,ovary,pancreas,prostate,salivary_gland,skin,small_intestine,soft_tissue,stomach,thyroid,upper_aerodigestive_tract,urinary_tract,vulva	Phosphatase tensin type (1);Dual specificity phosphatase, catalytic domain (1);	BZS,MHAM,MMAC1,PTEN,PTEN1,TEP1	0	MODERATE	missense_variant	0.999
chr10	89692880	A	G	MAH_BTN-052	PTEN	ENSP00000361021:p.I122V	ERLOTINIB,EVEROLIMUS,GEFITINIB,TEMSIROLIMUS	FDA Approved,FDA Approved,FDA Approved,FDA Approved					PI3K inhibitors, AKT inhibitors, and mTOR inhibitors, PARP inhibitors	PI3K	Numerous cancers	Resistance to EGFR inhibition	Deletion; Biallelic Inactivation	1	1	KEEP		Somatic	1.6526e-19	1.6526e-19		null	null		3591	1496	29	NS,autonomic_ganglia,biliary_tract,bone,breast,central_nervous_system,cervix,endometrium,eye,genital_tract,haematopoietic_and_lymphoid_tissue,kidney,large_intestine,liver,lung,meninges,oesophagus,ovary,pancreas,prostate,salivary_gland,skin,small_intestine,soft_tissue,stomach,thyroid,upper_aerodigestive_tract,urinary_tract,vulva	Phosphatase tensin type (1);Dual specificity phosphatase, catalytic domain (1);	BZS,MHAM,MMAC1,PTEN,PTEN1,TEP1	0	MODERATE	missense_variant	0.333
chr10	89692905	G	A	MAH_BTN-052	PTEN	ENSP00000361021:p.R130Q	ERLOTINIB,EVEROLIMUS,GEFITINIB,TEMSIROLIMUS	FDA Approved,FDA Approved,FDA Approved,FDA Approved					PI3K inhibitors, AKT inhibitors, and mTOR inhibitors, PARP inhibitors	PI3K	Numerous cancers	Resistance to EGFR inhibition	Deletion; Biallelic Inactivation	1	1	KEEP		Somatic	5.6076e-16	5.6076e-16	COSM5033,COSM5033,COSM5033,COSM5033	520	18	biliary_tract,breast,central_nervous_system,cervix,endometrium,kidney,large_intestine,lung,oesophagus,ovary,pancreas,prostate,skin,small_intestine,soft_tissue,stomach,thyroid,upper_aerodigestive_tract	3591	1496	29	NS,autonomic_ganglia,biliary_tract,bone,breast,central_nervous_system,cervix,endometrium,eye,genital_tract,haematopoietic_and_lymphoid_tissue,kidney,large_intestine,liver,lung,meninges,oesophagus,ovary,pancreas,prostate,salivary_gland,skin,small_intestine,soft_tissue,stomach,thyroid,upper_aerodigestive_tract,urinary_tract,vulva	Phosphatase tensin type (1);Dual specificity phosphatase, catalytic domain (1);	BZS,MHAM,MMAC1,PTEN,PTEN1,TEP1	0	MODERATE	missense_variant	1
chr10	89720671	G	A	MAH_BTN-054	PTEN	ENSP00000361021:p.W274*	ERLOTINIB,EVEROLIMUS,GEFITINIB,TEMSIROLIMUS	FDA Approved,FDA Approved,FDA Approved,FDA Approved					PI3K inhibitors, AKT inhibitors, and mTOR inhibitors, PARP inhibitors	PI3K	Numerous cancers	Resistance to EGFR inhibition	Deletion; Biallelic Inactivation	1	1	KEEP		Somatic	9.7292e-12	9.7292e-12	COSM5158,COSM5158	8	2	central_nervous_system,endometrium	3591	1496	29	NS,autonomic_ganglia,biliary_tract,bone,breast,central_nervous_system,cervix,endometrium,eye,genital_tract,haematopoietic_and_lymphoid_tissue,kidney,large_intestine,liver,lung,meninges,oesophagus,ovary,pancreas,prostate,salivary_gland,skin,small_intestine,soft_tissue,stomach,thyroid,upper_aerodigestive_tract,urinary_tract,vulva		BZS,MHAM,MMAC1,PTEN,PTEN1,TEP1	0	HIGH	stop_gained	0
chr10	89624294	T	TA	MAH_BTN-055	PTEN	ENSP00000361021:p.-23-24X	ERLOTINIB,EVEROLIMUS,GEFITINIB,TEMSIROLIMUS	FDA Approved,FDA Approved,FDA Approved,FDA Approved					PI3K inhibitors, AKT inhibitors, and mTOR inhibitors, PARP inhibitors	PI3K	Numerous cancers	Resistance to EGFR inhibition	Deletion; Biallelic Inactivation	0	1			Somatic	0.0059972	0.0059972	COSM5752868,COSM5801969	2	1	breast	3591	1496	29	NS,autonomic_ganglia,biliary_tract,bone,breast,central_nervous_system,cervix,endometrium,eye,genital_tract,haematopoietic_and_lymphoid_tissue,kidney,large_intestine,liver,lung,meninges,oesophagus,ovary,pancreas,prostate,salivary_gland,skin,small_intestine,soft_tissue,stomach,thyroid,upper_aerodigestive_tract,urinary_tract,vulva		BZS,MHAM,MMAC1,PTEN,PTEN1,TEP1	0	HIGH	frameshift_variant	0
chr10	89720730	G	GAAA	MAH_BTN-065	PTEN	ENSP00000361021:p.S294RN	ERLOTINIB,EVEROLIMUS,GEFITINIB,TEMSIROLIMUS	FDA Approved,FDA Approved,FDA Approved,FDA Approved					PI3K inhibitors, AKT inhibitors, and mTOR inhibitors, PARP inhibitors	PI3K	Numerous cancers	Resistance to EGFR inhibition	Deletion; Biallelic Inactivation	0	1			Somatic	1.647e-11	1.647e-11		null	null		3591	1496	29	NS,autonomic_ganglia,biliary_tract,bone,breast,central_nervous_system,cervix,endometrium,eye,genital_tract,haematopoietic_and_lymphoid_tissue,kidney,large_intestine,liver,lung,meninges,oesophagus,ovary,pancreas,prostate,salivary_gland,skin,small_intestine,soft_tissue,stomach,thyroid,upper_aerodigestive_tract,urinary_tract,vulva		BZS,MHAM,MMAC1,PTEN,PTEN1,TEP1	0	MODERATE	protein_altering_variant	0
chr10	89720732	CTATGT	C	MAH_BTN-065	PTEN	ENSP00000361021:p.LC295-296X	ERLOTINIB,EVEROLIMUS,GEFITINIB,TEMSIROLIMUS	FDA Approved,FDA Approved,FDA Approved,FDA Approved					PI3K inhibitors, AKT inhibitors, and mTOR inhibitors, PARP inhibitors	PI3K	Numerous cancers	Resistance to EGFR inhibition	Deletion; Biallelic Inactivation	0	1			Somatic	2.0853e-12	2.0853e-12		null	null		3591	1496	29	NS,autonomic_ganglia,biliary_tract,bone,breast,central_nervous_system,cervix,endometrium,eye,genital_tract,haematopoietic_and_lymphoid_tissue,kidney,large_intestine,liver,lung,meninges,oesophagus,ovary,pancreas,prostate,salivary_gland,skin,small_intestine,soft_tissue,stomach,thyroid,upper_aerodigestive_tract,urinary_tract,vulva		BZS,MHAM,MMAC1,PTEN,PTEN1,TEP1	0	HIGH	frameshift_variant	0
chr10	89725078	C	T	MAH_BTN-078	PTEN	ENSP00000361021:p.P354L	ERLOTINIB,EVEROLIMUS,GEFITINIB,TEMSIROLIMUS	FDA Approved,FDA Approved,FDA Approved,FDA Approved					PI3K inhibitors, AKT inhibitors, and mTOR inhibitors, PARP inhibitors	PI3K	Numerous cancers	Resistance to EGFR inhibition	Deletion; Biallelic Inactivation	0	1	KEEP			null	null	COSM5031897	1	1	pancreas	3591	1496	29	NS,autonomic_ganglia,biliary_tract,bone,breast,central_nervous_system,cervix,endometrium,eye,genital_tract,haematopoietic_and_lymphoid_tissue,kidney,large_intestine,liver,lung,meninges,oesophagus,ovary,pancreas,prostate,salivary_gland,skin,small_intestine,soft_tissue,stomach,thyroid,upper_aerodigestive_tract,urinary_tract,vulva		BZS,MHAM,MMAC1,PTEN,PTEN1,TEP1	0.0002	MODERATE	missense_variant	0.972
chr10	89717672	C	T	MAH_BTN-079	PTEN	ENSP00000361021:p.R233*	ERLOTINIB,EVEROLIMUS,GEFITINIB,TEMSIROLIMUS	FDA Approved,FDA Approved,FDA Approved,FDA Approved					PI3K inhibitors, AKT inhibitors, and mTOR inhibitors, PARP inhibitors	PI3K	Numerous cancers	Resistance to EGFR inhibition	Deletion; Biallelic Inactivation	1	1	KEEP		Somatic	2.2059e-12	2.2059e-12	COSM5154	120	16	NS,breast,central_nervous_system,cervix,endometrium,haematopoietic_and_lymphoid_tissue,kidney,large_intestine,lung,ovary,pancreas,prostate,skin,small_intestine,soft_tissue,stomach	3591	1496	29	NS,autonomic_ganglia,biliary_tract,bone,breast,central_nervous_system,cervix,endometrium,eye,genital_tract,haematopoietic_and_lymphoid_tissue,kidney,large_intestine,liver,lung,meninges,oesophagus,ovary,pancreas,prostate,salivary_gland,skin,small_intestine,soft_tissue,stomach,thyroid,upper_aerodigestive_tract,urinary_tract,vulva		BZS,MHAM,MMAC1,PTEN,PTEN1,TEP1	0	HIGH	stop_gained	0
chr10	89685307	T	A	MAH_BTN-083	PTEN	ENSP00000361021:p.Y68N	ERLOTINIB,EVEROLIMUS,GEFITINIB,TEMSIROLIMUS	FDA Approved,FDA Approved,FDA Approved,FDA Approved					PI3K inhibitors, AKT inhibitors, and mTOR inhibitors, PARP inhibitors	PI3K	Numerous cancers	Resistance to EGFR inhibition	Deletion; Biallelic Inactivation	0	1	KEEP			null	null	COSM249839	4	3	breast,endometrium,large_intestine	3591	1496	29	NS,autonomic_ganglia,biliary_tract,bone,breast,central_nervous_system,cervix,endometrium,eye,genital_tract,haematopoietic_and_lymphoid_tissue,kidney,large_intestine,liver,lung,meninges,oesophagus,ovary,pancreas,prostate,salivary_gland,skin,small_intestine,soft_tissue,stomach,thyroid,upper_aerodigestive_tract,urinary_tract,vulva	Phosphatase tensin type (1);	BZS,MHAM,MMAC1,PTEN,PTEN1,TEP1	0	MODERATE	missense_variant	1
chr10	89720671	G	A	MAH_BTN-085	PTEN	ENSP00000361021:p.W274*	ERLOTINIB,EVEROLIMUS,GEFITINIB,TEMSIROLIMUS	FDA Approved,FDA Approved,FDA Approved,FDA Approved					PI3K inhibitors, AKT inhibitors, and mTOR inhibitors, PARP inhibitors	PI3K	Numerous cancers	Resistance to EGFR inhibition	Deletion; Biallelic Inactivation	1	1	KEEP		Somatic	0.00071196	0.00071196	COSM5158,COSM5158	8	2	central_nervous_system,endometrium	3591	1496	29	NS,autonomic_ganglia,biliary_tract,bone,breast,central_nervous_system,cervix,endometrium,eye,genital_tract,haematopoietic_and_lymphoid_tissue,kidney,large_intestine,liver,lung,meninges,oesophagus,ovary,pancreas,prostate,salivary_gland,skin,small_intestine,soft_tissue,stomach,thyroid,upper_aerodigestive_tract,urinary_tract,vulva		BZS,MHAM,MMAC1,PTEN,PTEN1,TEP1	0	HIGH	stop_gained	0
chr10	89720832	CAAAT	C	MAH_BTN-085	PTEN	ENSP00000361021:p.NK329-330X	ERLOTINIB,EVEROLIMUS,GEFITINIB,TEMSIROLIMUS	FDA Approved,FDA Approved,FDA Approved,FDA Approved					PI3K inhibitors, AKT inhibitors, and mTOR inhibitors, PARP inhibitors	PI3K	Numerous cancers	Resistance to EGFR inhibition	Deletion; Biallelic Inactivation	0	1			Somatic	0.0015712	0.0015712	COSM4955,COSM4932	9	4	breast,central_nervous_system,endometrium,skin	3591	1496	29	NS,autonomic_ganglia,biliary_tract,bone,breast,central_nervous_system,cervix,endometrium,eye,genital_tract,haematopoietic_and_lymphoid_tissue,kidney,large_intestine,liver,lung,meninges,oesophagus,ovary,pancreas,prostate,salivary_gland,skin,small_intestine,soft_tissue,stomach,thyroid,upper_aerodigestive_tract,urinary_tract,vulva		BZS,MHAM,MMAC1,PTEN,PTEN1,TEP1	0	HIGH	frameshift_variant	0
chr10	89624301	G	C	MAH_R17017895LU01	PTEN	ENSP00000361021:p.L25F	ERLOTINIB,EVEROLIMUS,GEFITINIB,TEMSIROLIMUS	FDA Approved,FDA Approved,FDA Approved,FDA Approved					PI3K inhibitors, AKT inhibitors, and mTOR inhibitors, PARP inhibitors	PI3K	Numerous cancers	Resistance to EGFR inhibition	Deletion; Biallelic Inactivation	1	1	KEEP		Somatic	1.1750999692594633E-4	1.1750999692594633E-4	COSM39165	1	1	central_nervous_system	3609	1504	29	NS,autonomic_ganglia,biliary_tract,bone,breast,central_nervous_system,cervix,endometrium,eye,genital_tract,haematopoietic_and_lymphoid_tissue,kidney,large_intestine,liver,lung,meninges,oesophagus,ovary,pancreas,prostate,salivary_gland,skin,small_intestine,soft_tissue,stomach,thyroid,upper_aerodigestive_tract,urinary_tract,vulva	Phosphatase tensin type (1);	PTEN,BZS,MHAM,MMAC1,TEP1,PTEN1	0.0	MODERATE	missense_variant	0.996999979019165
chr10	89692917	T	A	MAH_R17017894LU01	PTEN	ENSP00000361021:p.M134K	ERLOTINIB,EVEROLIMUS,GEFITINIB,TEMSIROLIMUS	FDA Approved,FDA Approved,FDA Approved,FDA Approved					PI3K inhibitors, AKT inhibitors, and mTOR inhibitors, PARP inhibitors	PI3K	Numerous cancers	Resistance to EGFR inhibition	Deletion; Biallelic Inactivation	1	1	KEEP		Somatic	2.520000066397188E-7	2.520000066397188E-7		null	null		3609	1504	29	NS,autonomic_ganglia,biliary_tract,bone,breast,central_nervous_system,cervix,endometrium,eye,genital_tract,haematopoietic_and_lymphoid_tissue,kidney,large_intestine,liver,lung,meninges,oesophagus,ovary,pancreas,prostate,salivary_gland,skin,small_intestine,soft_tissue,stomach,thyroid,upper_aerodigestive_tract,urinary_tract,vulva	Phosphatase tensin type (1);Dual specificity phosphatase, catalytic domain (1);	PTEN,BZS,MHAM,MMAC1,TEP1,PTEN1	0.0	MODERATE	missense_variant	1.0
chr10	89693002	C	CA	MAH_R17017899LU01	PTEN	ENSP00000361021:p.-162-163X	ERLOTINIB,EVEROLIMUS,GEFITINIB,TEMSIROLIMUS	FDA Approved,FDA Approved,FDA Approved,FDA Approved					PI3K inhibitors, AKT inhibitors, and mTOR inhibitors, PARP inhibitors	PI3K	Numerous cancers	Resistance to EGFR inhibition	Deletion; Biallelic Inactivation	0	1			Somatic	3.960499983524102E-11	3.960499983524102E-11	COSM5193686,COSM4999	6	4	NS,breast,endometrium,skin	3609	1504	29	NS,autonomic_ganglia,biliary_tract,bone,breast,central_nervous_system,cervix,endometrium,eye,genital_tract,haematopoietic_and_lymphoid_tissue,kidney,large_intestine,liver,lung,meninges,oesophagus,ovary,pancreas,prostate,salivary_gland,skin,small_intestine,soft_tissue,stomach,thyroid,upper_aerodigestive_tract,urinary_tract,vulva		PTEN,BZS,MHAM,MMAC1,TEP1,PTEN1	0.0	HIGH	frameshift_variant	0.0

## Sheet: RB1
Chrom	Pos	Reference	Call	PN	Gene_symbol	COSMIC_HGVSp	Drug_Gene	Drug_Gene_ApprovalStatus	Drug_Pathway	Drug_Pathway_ApprovalStatus	Drug_SourcePathway	Drug_Mechanism_of_Action	Gene_ActionableDrugClasses	Gene_ActionablePathways	Gene_ActionableTumors	ResistancexSensitivity_Variants	Gene_ActionableMutations	caller_both	caller_either	mutect_judgement	mutect_failure_reasons	varscan2_somatic_status	varscan2_somatic_p_value	varscan2_variant_p_value	COSMIC_IDs	COSMIC_count_vars	COSMIC_pscount	COSMIC_primarysites	COSMIC_count_varsInGene	COSMIC_count_lociInGene	COSMIC_count_primarysitesInGene	COSMIC_primarysitesInGene	dbNSFP_Interpro_domain	GENE_Aliases	VEP_Max_Af	VEP_Max_Impact	VEP_max_consequence	VEP_max_score
chr13	49039407	C	T	MAH_BTN-028	RB1	ENSP00000267163:p.R798W			Palbociclib	FDA approved	CDK	Palbociclib is an oral, reversible, selective, small-molecule inhibitor of CDK4 and CDK6. CDK4 and CDK6 along with their regulatory partner cyclin D1 play a key role in regulating the G1- to S-phase cell-cycle transition via regulation of phosphorylation of the retinoblastoma (Rb) protein.	CDK inhibitors	CDK			Biallelic Inactivation	1	1	KEEP		Somatic	7.1741e-08	7.1741e-08	COSM3369088,COSM925,COSM3369088,COSM925,COSM3369088,COSM925	9	2	ovary,thyroid	1767	1149	29	NS,adrenal_gland,biliary_tract,bone,breast,central_nervous_system,cervix,endometrium,eye,fallopian_tube,haematopoietic_and_lymphoid_tissue,kidney,large_intestine,liver,lung,oesophagus,ovary,pancreas,pituitary,prostate,salivary_gland,skin,small_intestine,soft_tissue,stomach,thymus,thyroid,upper_aerodigestive_tract,urinary_tract	Rb C-terminal (1);	OSRC,PPP1R130,RB,RB1	0.0043	MODERATE	missense_variant	1
chr13	49030386	C	A	MAH_BTN-029	RB1	ENSP00000267163:p.R621S			Palbociclib	FDA approved	CDK	Palbociclib is an oral, reversible, selective, small-molecule inhibitor of CDK4 and CDK6. CDK4 and CDK6 along with their regulatory partner cyclin D1 play a key role in regulating the G1- to S-phase cell-cycle transition via regulation of phosphorylation of the retinoblastoma (Rb) protein.	CDK inhibitors	CDK			Biallelic Inactivation	1	1	KEEP		Somatic	3.6511e-11	3.6511e-11	COSM1046,COSM1740016	5	3	haematopoietic_and_lymphoid_tissue,pituitary,stomach	1767	1149	29	NS,adrenal_gland,biliary_tract,bone,breast,central_nervous_system,cervix,endometrium,eye,fallopian_tube,haematopoietic_and_lymphoid_tissue,kidney,large_intestine,liver,lung,oesophagus,ovary,pancreas,pituitary,prostate,salivary_gland,skin,small_intestine,soft_tissue,stomach,thymus,thyroid,upper_aerodigestive_tract,urinary_tract		OSRC,PPP1R130,RB,RB1	0.00411523	MODERATE	missense_variant	0.015
chr13	48954326	CAT	C	MAH_BTN-047	RB1	ENSP00000267163:p.M484X			Palbociclib	FDA approved	CDK	Palbociclib is an oral, reversible, selective, small-molecule inhibitor of CDK4 and CDK6. CDK4 and CDK6 along with their regulatory partner cyclin D1 play a key role in regulating the G1- to S-phase cell-cycle transition via regulation of phosphorylation of the retinoblastoma (Rb) protein.	CDK inhibitors	CDK			Biallelic Inactivation	0	1			Somatic	0.0028986	0.0028986	COSM4990380,COSM4990381	2	1	skin	1767	1149	29	NS,adrenal_gland,biliary_tract,bone,breast,central_nervous_system,cervix,endometrium,eye,fallopian_tube,haematopoietic_and_lymphoid_tissue,kidney,large_intestine,liver,lung,oesophagus,ovary,pancreas,pituitary,prostate,salivary_gland,skin,small_intestine,soft_tissue,stomach,thymus,thyroid,upper_aerodigestive_tract,urinary_tract		OSRC,PPP1R130,RB,RB1	0	HIGH	frameshift_variant	0
chr13	48878186	G	A	MAH_BTN-062	RB1	ENSP00000267163:p.			Palbociclib	FDA approved	CDK	Palbociclib is an oral, reversible, selective, small-molecule inhibitor of CDK4 and CDK6. CDK4 and CDK6 along with their regulatory partner cyclin D1 play a key role in regulating the G1- to S-phase cell-cycle transition via regulation of phosphorylation of the retinoblastoma (Rb) protein.	CDK inhibitors	CDK			Biallelic Inactivation	1	1	KEEP		Somatic	3.3652e-05	3.3652e-05		null	null		1767	1149	29	NS,adrenal_gland,biliary_tract,bone,breast,central_nervous_system,cervix,endometrium,eye,fallopian_tube,haematopoietic_and_lymphoid_tissue,kidney,large_intestine,liver,lung,oesophagus,ovary,pancreas,pituitary,prostate,salivary_gland,skin,small_intestine,soft_tissue,stomach,thymus,thyroid,upper_aerodigestive_tract,urinary_tract		OSRC,PPP1R130,RB,RB1	0	HIGH	splice_donor_variant	0
chr13	48954369	C	T	MAH_BTN-062	RB1	ENSP00000267163:p.T497I			Palbociclib	FDA approved	CDK	Palbociclib is an oral, reversible, selective, small-molecule inhibitor of CDK4 and CDK6. CDK4 and CDK6 along with their regulatory partner cyclin D1 play a key role in regulating the G1- to S-phase cell-cycle transition via regulation of phosphorylation of the retinoblastoma (Rb) protein.	CDK inhibitors	CDK			Biallelic Inactivation	1	1	KEEP		Somatic	0.00035723	0.00035723		null	null		1767	1149	29	NS,adrenal_gland,biliary_tract,bone,breast,central_nervous_system,cervix,endometrium,eye,fallopian_tube,haematopoietic_and_lymphoid_tissue,kidney,large_intestine,liver,lung,oesophagus,ovary,pancreas,pituitary,prostate,salivary_gland,skin,small_intestine,soft_tissue,stomach,thymus,thyroid,upper_aerodigestive_tract,urinary_tract	Retinoblastoma-associated protein, A-box (1);Cyclin-like (2);	OSRC,PPP1R130,RB,RB1	0	MODERATE	missense_variant	1
chr13	48936961	T	TA	MAH_BTN-071	RB1	ENSP00000267163:p.I244NX			Palbociclib	FDA approved	CDK	Palbociclib is an oral, reversible, selective, small-molecule inhibitor of CDK4 and CDK6. CDK4 and CDK6 along with their regulatory partner cyclin D1 play a key role in regulating the G1- to S-phase cell-cycle transition via regulation of phosphorylation of the retinoblastoma (Rb) protein.	CDK inhibitors	CDK			Biallelic Inactivation	0	1			Somatic	2.0853e-29	2.0853e-29		null	null		1767	1149	29	NS,adrenal_gland,biliary_tract,bone,breast,central_nervous_system,cervix,endometrium,eye,fallopian_tube,haematopoietic_and_lymphoid_tissue,kidney,large_intestine,liver,lung,oesophagus,ovary,pancreas,pituitary,prostate,salivary_gland,skin,small_intestine,soft_tissue,stomach,thymus,thyroid,upper_aerodigestive_tract,urinary_tract		OSRC,PPP1R130,RB,RB1	0	HIGH	frameshift_variant	0
chr13	48941648	C	T	MAH_BTN-079	RB1	ENSP00000267163:p.R320*			Palbociclib	FDA approved	CDK	Palbociclib is an oral, reversible, selective, small-molecule inhibitor of CDK4 and CDK6. CDK4 and CDK6 along with their regulatory partner cyclin D1 play a key role in regulating the G1- to S-phase cell-cycle transition via regulation of phosphorylation of the retinoblastoma (Rb) protein.	CDK inhibitors	CDK			Biallelic Inactivation	0	1	KEEP			null	null	COSM1152653,COSM891	20	7	breast,endometrium,eye,ovary,pancreas,soft_tissue,stomach	1767	1149	29	NS,adrenal_gland,biliary_tract,bone,breast,central_nervous_system,cervix,endometrium,eye,fallopian_tube,haematopoietic_and_lymphoid_tissue,kidney,large_intestine,liver,lung,oesophagus,ovary,pancreas,pituitary,prostate,salivary_gland,skin,small_intestine,soft_tissue,stomach,thymus,thyroid,upper_aerodigestive_tract,urinary_tract		OSRC,PPP1R130,RB,RB1	0	HIGH	stop_gained	0
chr13	48955403	G	C	MAH_BTN-088	RB1	ENSP00000267163:p.D507H			Palbociclib	FDA approved	CDK	Palbociclib is an oral, reversible, selective, small-molecule inhibitor of CDK4 and CDK6. CDK4 and CDK6 along with their regulatory partner cyclin D1 play a key role in regulating the G1- to S-phase cell-cycle transition via regulation of phosphorylation of the retinoblastoma (Rb) protein.	CDK inhibitors	CDK			Biallelic Inactivation	0	1	KEEP			null	null		null	null		1767	1149	29	NS,adrenal_gland,biliary_tract,bone,breast,central_nervous_system,cervix,endometrium,eye,fallopian_tube,haematopoietic_and_lymphoid_tissue,kidney,large_intestine,liver,lung,oesophagus,ovary,pancreas,pituitary,prostate,salivary_gland,skin,small_intestine,soft_tissue,stomach,thymus,thyroid,upper_aerodigestive_tract,urinary_tract	Retinoblastoma-associated protein, A-box (1);Cyclin-like (2);	OSRC,PPP1R130,RB,RB1	0	MODERATE	missense_variant	0.759
chr13	49039407	C	T	MAH_BTN-088	RB1	ENSP00000267163:p.R798W			Palbociclib	FDA approved	CDK	Palbociclib is an oral, reversible, selective, small-molecule inhibitor of CDK4 and CDK6. CDK4 and CDK6 along with their regulatory partner cyclin D1 play a key role in regulating the G1- to S-phase cell-cycle transition via regulation of phosphorylation of the retinoblastoma (Rb) protein.	CDK inhibitors	CDK			Biallelic Inactivation	1	1	KEEP		Somatic	3.6447e-21	3.6447e-21	COSM3369088,COSM925,COSM3369088,COSM925,COSM3369088,COSM925	9	2	ovary,thyroid	1767	1149	29	NS,adrenal_gland,biliary_tract,bone,breast,central_nervous_system,cervix,endometrium,eye,fallopian_tube,haematopoietic_and_lymphoid_tissue,kidney,large_intestine,liver,lung,oesophagus,ovary,pancreas,pituitary,prostate,salivary_gland,skin,small_intestine,soft_tissue,stomach,thymus,thyroid,upper_aerodigestive_tract,urinary_tract	Rb C-terminal (1);	OSRC,PPP1R130,RB,RB1	0.0043	MODERATE	missense_variant	1
chr13	48947629	G	A	MAH_BTN-089	RB1	ENSP00000267163:p.			Palbociclib	FDA approved	CDK	Palbociclib is an oral, reversible, selective, small-molecule inhibitor of CDK4 and CDK6. CDK4 and CDK6 along with their regulatory partner cyclin D1 play a key role in regulating the G1- to S-phase cell-cycle transition via regulation of phosphorylation of the retinoblastoma (Rb) protein.	CDK inhibitors	CDK			Biallelic Inactivation	0	1	KEEP			null	null	COSM1015,COSM1152654,COSM1015,COSM1152654	48	8	bone,central_nervous_system,endometrium,eye,oesophagus,ovary,prostate,urinary_tract	1767	1149	29	NS,adrenal_gland,biliary_tract,bone,breast,central_nervous_system,cervix,endometrium,eye,fallopian_tube,haematopoietic_and_lymphoid_tissue,kidney,large_intestine,liver,lung,oesophagus,ovary,pancreas,pituitary,prostate,salivary_gland,skin,small_intestine,soft_tissue,stomach,thymus,thyroid,upper_aerodigestive_tract,urinary_tract		OSRC,PPP1R130,RB,RB1	1.50295e-05	HIGH	splice_donor_variant	0
chr13	48878131	C	G	MAH_R17017910LU01	RB1	ENSP00000267163:p.P28R			Palbociclib	FDA approved	CDK	Palbociclib is an oral, reversible, selective, small-molecule inhibitor of CDK4 and CDK6. CDK4 and CDK6 along with their regulatory partner cyclin D1 play a key role in regulating the G1- to S-phase cell-cycle transition via regulation of phosphorylation of the retinoblastoma (Rb) protein.	CDK inhibitors	CDK			Biallelic Inactivation	0	1	KEEP			null	null		null	null		1781	1155	29	NS,adrenal_gland,biliary_tract,bone,breast,central_nervous_system,cervix,endometrium,eye,fallopian_tube,haematopoietic_and_lymphoid_tissue,kidney,large_intestine,liver,lung,oesophagus,ovary,pancreas,pituitary,prostate,salivary_gland,skin,small_intestine,soft_tissue,stomach,thymus,thyroid,upper_aerodigestive_tract,urinary_tract		RB1,OSRC,RB,PPP1R130	5.357334157451987E-5	MODERATE	missense_variant	0.1509999930858612
chr13	48881415	G	A	MAH_R17017906LU01	RB1	ENSP00000267163:p.			Palbociclib	FDA approved	CDK	Palbociclib is an oral, reversible, selective, small-molecule inhibitor of CDK4 and CDK6. CDK4 and CDK6 along with their regulatory partner cyclin D1 play a key role in regulating the G1- to S-phase cell-cycle transition via regulation of phosphorylation of the retinoblastoma (Rb) protein.	CDK inhibitors	CDK			Biallelic Inactivation	1	1	KEEP		Somatic	3.36519988195505E-5	3.36519988195505E-5		null	null		1781	1155	29	NS,adrenal_gland,biliary_tract,bone,breast,central_nervous_system,cervix,endometrium,eye,fallopian_tube,haematopoietic_and_lymphoid_tissue,kidney,large_intestine,liver,lung,oesophagus,ovary,pancreas,pituitary,prostate,salivary_gland,skin,small_intestine,soft_tissue,stomach,thymus,thyroid,upper_aerodigestive_tract,urinary_tract		RB1,OSRC,RB,PPP1R130	0.0	HIGH	splice_acceptor_variant	0.0
chr13	49030387	G	A	MAH_R17017913LU01	RB1	ENSP00000267163:p.R621H			Palbociclib	FDA approved	CDK	Palbociclib is an oral, reversible, selective, small-molecule inhibitor of CDK4 and CDK6. CDK4 and CDK6 along with their regulatory partner cyclin D1 play a key role in regulating the G1- to S-phase cell-cycle transition via regulation of phosphorylation of the retinoblastoma (Rb) protein.	CDK inhibitors	CDK			Biallelic Inactivation	1	1	KEEP		Somatic	2.1852999048012523E-21	2.1852999048012523E-21	COSM4962401,COSM4962402	3	2	haematopoietic_and_lymphoid_tissue,pancreas	1781	1155	29	NS,adrenal_gland,biliary_tract,bone,breast,central_nervous_system,cervix,endometrium,eye,fallopian_tube,haematopoietic_and_lymphoid_tissue,kidney,large_intestine,liver,lung,oesophagus,ovary,pancreas,pituitary,prostate,salivary_gland,skin,small_intestine,soft_tissue,stomach,thymus,thyroid,upper_aerodigestive_tract,urinary_tract		RB1,OSRC,RB,PPP1R130	1.9999999494757503E-4	MODERATE	missense_variant	0.9919999837875366
chr13	49030486	G	T	MAH_R17017893LU01	RB1	ENSP00000267163:p.			Palbociclib	FDA approved	CDK	Palbociclib is an oral, reversible, selective, small-molecule inhibitor of CDK4 and CDK6. CDK4 and CDK6 along with their regulatory partner cyclin D1 play a key role in regulating the G1- to S-phase cell-cycle transition via regulation of phosphorylation of the retinoblastoma (Rb) protein.	CDK inhibitors	CDK			Biallelic Inactivation	1	1	KEEP		Somatic	4.50999999884516E-4	4.50999999884516E-4		null	null		1781	1155	29	NS,adrenal_gland,biliary_tract,bone,breast,central_nervous_system,cervix,endometrium,eye,fallopian_tube,haematopoietic_and_lymphoid_tissue,kidney,large_intestine,liver,lung,oesophagus,ovary,pancreas,pituitary,prostate,salivary_gland,skin,small_intestine,soft_tissue,stomach,thymus,thyroid,upper_aerodigestive_tract,urinary_tract		RB1,OSRC,RB,PPP1R130	0.0	HIGH	splice_donor_variant	0.0

[truncated: 2 more sheets: ARID1B, TMB]
